# Supplementary material for: A silicon–carbonyl complex stable at room temperature
Source: Springer Nature journal article supplement (doi:10.1038/s41557-020-0456-x), 2020-04-20
Supplement: 41557_2020_456_MOESM34_ESM.cif [file 41557_2020_456_MOESM34_ESM.cif]

 
data_jus_132_a2_tw5
###################################################################
#                                                                 #
#   for any questions concerning this structure please contact:   #
#                                                                 #
#   Christoph W\"olper                                            #
#   Fachbereich Chemie der                                        #
#   Universit\"at Duisburg-Essen                                  #
#   Campus Essen Universit\"atsstr. 7                             #
#   D-45117 Essen, Germany                                        #
#                                                                 #
#   e-mail: christoph.woelper@uni-due.de                          #
#   phone:  ++49 (0)201 183 4780                                  #
#                                                                 #
###################################################################


_publ_contact_author 
;
         Prof. Dr. Schulz, Stephan
         Fachbereich Chemie der
         Universit\"at Duisburg-Essen
         Campus Essen, Universit\"atsstr. 7
         D-45141 Essen, Germany
;
_publ_contact_author_email          'stephan.schulz@.uni-due.de'
_publ_contact_author_phone          '++49 (0)201 183 4635'
_publ_contact_author_fax            '++49 (0)201 183 3830'

loop_
 _publ_author_name
 _publ_author_address
   'Chelladurai, Ganesamoorthy'
;
   Fachbereich Chemie der
   Universit\"at Duisburg-Essen
   Campus Essen Universit\"atsstr. 7
   D-45117 Essen, Germany
; 
   'Schoening, Juliane'
;
   Fachbereich Chemie der
   Universit\"at Duisburg-Essen
   Campus Essen Universit\"atsstr. 7
   D-45117 Essen, Germany
; 
   'W\"olper, Christoph'
;
   Fachbereich Chemie der
   Universit\"at Duisburg-Essen
   Campus Essen Universit\"atsstr. 7
   D-45117 Essen, Germany
; 
   'Song, Lijuan'
;
   Institute of Organic Chemistry
   Justus Liebig University
   Heinrich-Buff-Ring 17
   D-35392 Giessen, Germany
; 
   'Schreiner, Peter R.'
;
   Institute of Organic Chemistry
   Justus Liebig University
   Heinrich-Buff-Ring 17
   D-35392 Giessen, Germany
; 
   'Schulz, Stephan'
;
   Fachbereich Chemie der
   Universit\"at Duisburg-Essen
   Campus Essen Universit\"atsstr. 7
   D-45117 Essen, Germany
; 


_publ_section_title
;
 Synthesis, structure and reactivity of a stable main group metal
 carbonyl complex
;
_publ_requested_journal           'Nature Chemistry'
_journal_name_full                   
;
 ?
;
_journal_coden_Cambridge             353
_journal_year                        ?
_journal_volume                      ?
_journal_issue                       ?
_journal_page_first                  ?
_journal_page_last                   ?
_journal_paper_doi                   ?

_database_code_depnum_ccdc_archive   ?
 
_audit_creation_method            'SHELXL-2017/1'
_shelx_SHELXL_version_number      '2017/1'
_chemical_name_systematic         ?
_chemical_name_common             ?
_chemical_melting_point           ?
_chemical_formula_moiety          ?
_chemical_formula_sum
 'C59 H82 Br2 Ga2 N4 O Si' 
_chemical_formula_weight          1190.63

loop_
 _atom_type_symbol
 _atom_type_description
 _atom_type_scat_dispersion_real
 _atom_type_scat_dispersion_imag
 _atom_type_scat_source
 'C'  'C'   0.0033   0.0016
 'International Tables Vol C Tables 4.2.6.8 and 6.1.1.4'
 'H'  'H'   0.0000   0.0000
 'International Tables Vol C Tables 4.2.6.8 and 6.1.1.4'
 'O'  'O'   0.0106   0.0060
 'International Tables Vol C Tables 4.2.6.8 and 6.1.1.4'
 'Si'  'Si'   0.0817   0.0704
 'International Tables Vol C Tables 4.2.6.8 and 6.1.1.4'
 'Br'  'Br'  -0.2901   2.4595
 'International Tables Vol C Tables 4.2.6.8 and 6.1.1.4'
 'Ga'  'Ga'   0.2307   1.6083
 'International Tables Vol C Tables 4.2.6.8 and 6.1.1.4'
 'N'  'N'   0.0061   0.0033
 'International Tables Vol C Tables 4.2.6.8 and 6.1.1.4'
 
_space_group_crystal_system       monoclinic
_space_group_IT_number            15
_space_group_name_H-M_alt         'C 2/c'
_space_group_name_Hall            '-C 2yc'
 
_shelx_space_group_comment
;
The symmetry employed for this shelxl refinement is uniquely defined
by the following loop, which should always be used as a source of
symmetry information in preference to the above space-group names.
They are only intended as comments.
;
 
loop_
 _space_group_symop_operation_xyz
 'x, y, z'
 '-x, y, -z+1/2'
 'x+1/2, y+1/2, z'
 '-x+1/2, y+1/2, -z+1/2'
 '-x, -y, -z'
 'x, -y, z-1/2'
 '-x+1/2, -y+1/2, -z'
 'x+1/2, -y+1/2, z-1/2'
 
_cell_length_a                    23.9753(15)
_cell_length_b                    10.8256(7)
_cell_length_c                    23.4438(16)
_cell_angle_alpha                 90
_cell_angle_beta                  99.840(4)
_cell_angle_gamma                 90
_cell_volume                      5995.3(7)
_cell_formula_units_Z             4
_cell_measurement_temperature     100(2)
_cell_measurement_reflns_used     4523
_cell_measurement_theta_min        2.81
_cell_measurement_theta_max       28.32
 
_exptl_crystal_description        tablet
_exptl_crystal_colour             'pale orange'
_exptl_crystal_density_meas       ?
_exptl_crystal_density_method     ?
_exptl_crystal_density_diffrn     1.319          
_exptl_crystal_F_000              2472
_exptl_transmission_factor_min    ?
_exptl_transmission_factor_max    ?
_exptl_crystal_size_max           0.167
_exptl_crystal_size_mid           0.118
_exptl_crystal_size_min           0.074
_exptl_absorpt_coefficient_mu     2.292
_shelx_estimated_absorpt_T_min    0.701
_shelx_estimated_absorpt_T_max    0.849
_exptl_absorpt_correction_type    'multi-scan' 
_exptl_absorpt_correction_T_min   0.64 
_exptl_absorpt_correction_T_max   0.75 
_exptl_absorpt_process_details     
; 
 TWINABS
;
_exptl_absorpt_special_details    ?
_diffrn_ambient_temperature       100(2)
_diffrn_radiation_wavelength      0.71073
_diffrn_radiation_type            MoK\a
_diffrn_radiation_source          'fine-focus sealed tube' 
_diffrn_radiation_monochromator   'Triumph Goebel mirror' 
_diffrn_measurement_device_type   'Bruker D8 KAPPA II (APEX II detector)' 
_diffrn_measurement_method        'Data collection strategy APEX 2/COSMO'
_diffrn_detector_area_resol_mean  512
_diffrn_reflns_number             75013
_diffrn_reflns_av_unetI/netI      0.0598
_diffrn_reflns_av_R_equivalents   0.0542
_diffrn_reflns_limit_h_min        -36
_diffrn_reflns_limit_h_max        36
_diffrn_reflns_limit_k_min        0
_diffrn_reflns_limit_k_max        16
_diffrn_reflns_limit_l_min        0
_diffrn_reflns_limit_l_max        36
_diffrn_reflns_theta_min          1.724
_diffrn_reflns_theta_max          33.344
_diffrn_reflns_theta_full         25.242
_diffrn_measured_fraction_theta_max   0.911
_diffrn_measured_fraction_theta_full  0.994
_diffrn_reflns_Laue_measured_fraction_max    0.911
_diffrn_reflns_Laue_measured_fraction_full   0.994
_diffrn_reflns_point_group_measured_fraction_max   0.911
_diffrn_reflns_point_group_measured_fraction_full  0.994
_reflns_number_total              10218
_reflns_number_gt                 7680
_reflns_threshold_expression      'I > 2\s(I)'
_reflns_Friedel_coverage          0.000
_reflns_Friedel_fraction_max      .
_reflns_Friedel_fraction_full     .
 
_reflns_special_details
;
 _reflns_Friedel_fraction is defined as the number of unique
 Friedel pairs measured divided by the number that would be
 possible theoretically, ignoring centric projections and
 systematic absences.
;
 
_computing_data_collection        'BRUKER APEX2(v2009.5-1)' 
_computing_cell_refinement        'BRUKER APEX2(v2009.5-1)' 
_computing_data_reduction         'BRUKER APEX2(v2009.5-1)' 
_computing_structure_solution     'BRUKER APEX2(v2009.5-1)'
_computing_structure_refinement   'SHELXL-2017/1 (Sheldrick, 2017)'
_computing_molecular_graphics     'ORTEP/PLATON (Spek)' 
_computing_publication_material   'BRUKER AXS SHELXTL (c) 2008 / Vers. 2008/4' 

_refine_special_details           
;
 Treatment of hydrogen atoms:    
 Riding model on idealized geometries 
 with the 1.2 fold isotropic displacement 
 parameters of the equivalent Uij of the 
 corresponding carbon atom.
 The methyl groups are idealized with
 tetrahedral angles in a combined 
 rotating and rigid group refinement
 with the 1.5 fold isotropic displacement
 parameters of the equivalent Uij of the 
 corresponding carbon atom.
 Twinning:
 Refined as a 2-component non-merohedral twin against HKLF5 data.
 Disorder:
 The molecule is disordered over a two-fold rotational axis. SADI
 and RIGU restraints were applied to both components of the phenyl
 ring C18 to C23. The adp of both components of the i-pr group
 C15 to C17 were restrained with RIGU.
;
_refine_ls_structure_factor_coef  Fsqd
_refine_ls_matrix_type            full
_refine_ls_weighting_scheme       calc
_refine_ls_weighting_details
'w=1/[\s^2^(Fo^2^)+(0.0418P)^2^] where P=(Fo^2^+2Fc^2^)/3'
_atom_sites_solution_primary      dreict
_atom_sites_solution_secondary    diffmap
_atom_sites_solution_hydrogens    geom
_refine_ls_hydrogen_treatment     constr
_refine_ls_extinction_method      none
_refine_ls_extinction_coef        .
_refine_ls_number_reflns          10218
_refine_ls_number_parameters      444
_refine_ls_number_restraints      156
_refine_ls_R_factor_all           0.0656
_refine_ls_R_factor_gt            0.0373
_refine_ls_wR_factor_ref          0.0789
_refine_ls_wR_factor_gt           0.0726
_refine_ls_goodness_of_fit_ref    1.022
_refine_ls_restrained_S_all       1.017
_refine_ls_shift/su_max           0.001
_refine_ls_shift/su_mean          0.000
 
loop_
 _atom_site_label
 _atom_site_type_symbol
 _atom_site_fract_x
 _atom_site_fract_y
 _atom_site_fract_z
 _atom_site_U_iso_or_equiv
 _atom_site_adp_type
 _atom_site_occupancy
 _atom_site_site_symmetry_order  
 _atom_site_calc_flag
 _atom_site_refinement_flags_posn
 _atom_site_refinement_flags_adp
 _atom_site_refinement_flags_occupancy
 _atom_site_disorder_assembly
 _atom_site_disorder_group
Br1 Br -0.03125(2) 0.43042(2) 0.14524(2) 0.02686(6) Uani 1 1 d . . . . .
Ga1 Ga -0.00146(2) 0.63938(2) 0.15914(2) 0.02122(6) Uani 1 1 d . . . . .
Si1 Si 0.000000 0.74651(8) 0.250000 0.0228(2) Uani 1 2 d S T P . .
O1 O 0.1257(2) 0.7822(5) 0.27151(18) 0.0559(13) Uani 0.5 1 d . . P A 1
C30 C 0.0787(2) 0.7604(5) 0.2637(2) 0.0325(11) Uani 0.5 1 d . . P A 1
N1 N -0.04994(9) 0.72397(17) 0.09505(8) 0.0228(4) Uani 1 1 d . . . . .
N2 N 0.06684(8) 0.64185(18) 0.12424(9) 0.0274(4) Uani 1 1 d . . . . .
C1 C -0.03978(11) 0.7048(2) 0.04149(10) 0.0284(5) Uani 1 1 d . . . . .
C2 C 0.00909(12) 0.6513(2) 0.02911(11) 0.0304(6) Uani 1 1 d . . . . .
H2 H 0.007687 0.624523 -0.009692 0.036 Uiso 1 1 calc R U . . .
C3 C 0.06056(12) 0.6317(2) 0.06662(12) 0.0328(6) Uani 1 1 d . . . . .
C4 C -0.08289(14) 0.7474(3) -0.00989(11) 0.0425(7) Uani 1 1 d . . . . .
H4A H -0.088606 0.836700 -0.007281 0.064 Uiso 1 1 calc R U . . .
H4B H -0.118883 0.704604 -0.009694 0.064 Uiso 1 1 calc R U . . .
H4C H -0.069010 0.728305 -0.045863 0.064 Uiso 1 1 calc R U . . .
C5 C 0.11070(15) 0.6009(3) 0.03904(19) 0.0585(10) Uani 1 1 d . . . . .
H5A H 0.100185 0.607129 -0.003131 0.088 Uiso 1 1 calc R U . . .
H5B H 0.123268 0.516546 0.049577 0.088 Uiso 1 1 calc R U . . .
H5C H 0.141496 0.658923 0.052618 0.088 Uiso 1 1 calc R U . . .
C6 C -0.09980(12) 0.7953(2) 0.10239(11) 0.0301(5) Uani 1 1 d . . . . .
C7 C -0.15259(12) 0.7371(3) 0.09739(12) 0.0330(6) Uani 1 1 d . . . . .
C8 C -0.19923(14) 0.8101(3) 0.10377(15) 0.0464(8) Uani 1 1 d . . . . .
H8 H -0.235395 0.772519 0.101028 0.056 Uiso 1 1 calc R U . . .
C9 C -0.19407(16) 0.9342(3) 0.11384(18) 0.0565(10) Uani 1 1 d . . . . .
H9 H -0.226595 0.982184 0.116963 0.068 Uiso 1 1 calc R U . . .
C10 C -0.14191(16) 0.9898(3) 0.11946(16) 0.0542(9) Uani 1 1 d . . . . .
H10 H -0.138694 1.075858 0.127192 0.065 Uiso 1 1 calc R U . . .
C11 C -0.09356(14) 0.9222(3) 0.11402(14) 0.0419(7) Uani 1 1 d . . . . .
C12 C -0.16180(11) 0.6004(3) 0.08590(13) 0.0327(6) Uani 1 1 d . . . . .
H12 H -0.125708 0.564448 0.077329 0.039 Uiso 1 1 calc R U . . .
C13 C -0.17626(13) 0.5356(3) 0.13953(15) 0.0434(8) Uani 1 1 d . . . . .
H13A H -0.212259 0.567483 0.147888 0.065 Uiso 1 1 calc R U . . .
H13B H -0.146224 0.551215 0.172693 0.065 Uiso 1 1 calc R U . . .
H13C H -0.179566 0.446463 0.132351 0.065 Uiso 1 1 calc R U . . .
C14 C -0.20900(12) 0.5751(3) 0.03339(14) 0.0427(7) Uani 1 1 d . . . . .
H14A H -0.201380 0.622476 -0.000079 0.064 Uiso 1 1 calc R U . . .
H14B H -0.245638 0.600152 0.042829 0.064 Uiso 1 1 calc R U . . .
H14C H -0.209872 0.486800 0.024155 0.064 Uiso 1 1 calc R U . . .
C15 C -0.0363(8) 0.9855(13) 0.1272(4) 0.039(3) Uani 0.5 1 d . . P B 1
H15 H -0.007135 0.919512 0.137845 0.047 Uiso 0.5 1 calc R U P B 1
C16 C -0.0277(12) 1.0817(17) 0.1765(6) 0.049(3) Uani 0.5 1 d . . P B 1
H16A H -0.054167 1.150381 0.166425 0.074 Uiso 0.5 1 calc R U P B 1
H16B H 0.011214 1.112788 0.182128 0.074 Uiso 0.5 1 calc R U P B 1
H16C H -0.034798 1.042847 0.212391 0.074 Uiso 0.5 1 calc R U P B 1
C17 C -0.0263(7) 1.0417(11) 0.0704(4) 0.079(5) Uani 0.5 1 d . . P B 1
H17A H -0.023525 0.975769 0.042426 0.118 Uiso 0.5 1 calc R U P B 1
H17B H 0.009051 1.089247 0.077043 0.118 Uiso 0.5 1 calc R U P B 1
H17C H -0.057864 1.096514 0.055234 0.118 Uiso 0.5 1 calc R U P B 1
C15' C -0.0382(7) 0.9920(13) 0.1083(4) 0.042(3) Uani 0.5 1 d . . P B 2
H15' H -0.007229 0.930423 0.107542 0.051 Uiso 0.5 1 calc R U P B 2
C16' C -0.0238(10) 1.0704(17) 0.1616(7) 0.061(5) Uani 0.5 1 d . . P B 2
H16D H 0.011503 1.115095 0.160486 0.092 Uiso 0.5 1 calc R U P B 2
H16E H -0.019205 1.017533 0.196019 0.092 Uiso 0.5 1 calc R U P B 2
H16F H -0.054440 1.129687 0.163081 0.092 Uiso 0.5 1 calc R U P B 2
C17' C -0.0415(6) 1.0787(10) 0.0550(5) 0.059(2) Uani 0.5 1 d . . P B 2
H17D H -0.055130 1.031879 0.019529 0.088 Uiso 0.5 1 calc R U P B 2
H17E H -0.003827 1.112049 0.053335 0.088 Uiso 0.5 1 calc R U P B 2
H17F H -0.067680 1.146730 0.058411 0.088 Uiso 0.5 1 calc R U P B 2
C18' C 0.1227(5) 0.6405(8) 0.1662(3) 0.0213(17) Uani 0.5 1 d D . P C 2
C19' C 0.1492(6) 0.5298(13) 0.1856(6) 0.021(2) Uani 0.5 1 d D . P C 2
C20' C 0.2058(7) 0.5339(12) 0.2145(9) 0.038(3) Uani 0.5 1 d D . P C 2
H20' H 0.225607 0.459886 0.226650 0.045 Uiso 0.5 1 calc R U P C 2
C21' C 0.2318(5) 0.6474(9) 0.2248(5) 0.041(2) Uani 0.5 1 d D . P C 2
H21' H 0.270380 0.650549 0.242846 0.049 Uiso 0.5 1 calc R U P C 2
C22' C 0.2030(3) 0.7574(6) 0.2096(3) 0.0396(15) Uani 0.5 1 d D . P C 2
H22' H 0.221098 0.834081 0.220074 0.047 Uiso 0.5 1 calc R U P C 2
C23' C 0.1477(2) 0.7557(5) 0.1790(3) 0.0301(11) Uani 0.5 1 d D . P C 2
C27' C 0.1179(3) 0.8771(5) 0.1632(3) 0.0389(14) Uani 0.5 1 d . . P C 2
H27' H 0.076348 0.859388 0.157036 0.047 Uiso 0.5 1 calc R U P C 2
C28' C 0.1305(5) 0.9288(9) 0.1069(4) 0.060(3) Uani 0.5 1 d . . P C 2
H28A H 0.118337 0.869495 0.075656 0.089 Uiso 0.5 1 calc R U P C 2
H28B H 0.171220 0.943591 0.110387 0.089 Uiso 0.5 1 calc R U P C 2
H28C H 0.109971 1.006680 0.098189 0.089 Uiso 0.5 1 calc R U P C 2
C29' C 0.1295(4) 0.9738(6) 0.2123(4) 0.058(2) Uani 0.5 1 d . . P C 2
H29A H 0.170011 0.993585 0.220084 0.087 Uiso 0.5 1 calc R U P C 2
H29B H 0.118166 0.940284 0.247422 0.087 Uiso 0.5 1 calc R U P C 2
H29C H 0.107797 1.049008 0.200553 0.087 Uiso 0.5 1 calc R U P C 2
C18 C 0.1256(5) 0.6530(8) 0.1481(3) 0.0234(17) Uani 0.5 1 d D . P C 1
C19 C 0.1533(6) 0.5468(12) 0.1734(6) 0.020(2) Uani 0.5 1 d D . P C 1
C20 C 0.2080(6) 0.5605(10) 0.2056(8) 0.026(2) Uani 0.5 1 d D . P C 1
H20 H 0.226255 0.492175 0.226390 0.032 Uiso 0.5 1 calc R U P C 1
C21 C 0.2356(5) 0.6738(8) 0.2071(4) 0.037(2) Uani 0.5 1 d D . P C 1
H21 H 0.272882 0.681837 0.228302 0.044 Uiso 0.5 1 calc R U P C 1
C22 C 0.2095(2) 0.7741(6) 0.1783(3) 0.0365(13) Uani 0.5 1 d D . P C 1
H22 H 0.229368 0.850139 0.179232 0.044 Uiso 0.5 1 calc R U P C 1
C23 C 0.1538(2) 0.7667(5) 0.1474(3) 0.0321(12) Uani 0.5 1 d D . P C 1
C27 C 0.1262(3) 0.8820(7) 0.1201(5) 0.045(2) Uani 0.5 1 d . . P C 1
H27 H 0.087125 0.859263 0.100569 0.054 Uiso 0.5 1 calc R U P C 1
C28 C 0.1585(4) 0.9283(9) 0.0729(3) 0.066(2) Uani 0.5 1 d . . P C 1
H28D H 0.160952 0.861750 0.045076 0.099 Uiso 0.5 1 calc R U P C 1
H28E H 0.196795 0.953590 0.090798 0.099 Uiso 0.5 1 calc R U P C 1
H28F H 0.138515 0.998932 0.052812 0.099 Uiso 0.5 1 calc R U P C 1
C29 C 0.1207(5) 0.9832(6) 0.1615(5) 0.075(3) Uani 0.5 1 d . . P C 1
H29D H 0.102514 1.054641 0.140331 0.113 Uiso 0.5 1 calc R U P C 1
H29E H 0.158334 1.006741 0.181819 0.113 Uiso 0.5 1 calc R U P C 1
H29F H 0.097578 0.954878 0.189596 0.113 Uiso 0.5 1 calc R U P C 1
C24 C 0.12418(11) 0.4118(2) 0.17126(12) 0.0303(6) Uani 1 1 d . . . . .
H24' H 0.088641 0.423301 0.142482 0.036 Uiso 0.5 1 calc R U P C 2
H24 H 0.088131 0.416943 0.142716 0.036 Uiso 0.5 1 calc R U P C 1
C25 C 0.16266(11) 0.3196(3) 0.14648(12) 0.0366(6) Uani 1 1 d . . . . .
H25A H 0.142540 0.241196 0.137891 0.055 Uiso 1 1 calc R U . . .
H25B H 0.197084 0.305561 0.174917 0.055 Uiso 1 1 calc R U . . .
H25C H 0.172878 0.353307 0.110863 0.055 Uiso 1 1 calc R U . . .
C26 C 0.10881(13) 0.3624(3) 0.22742(13) 0.0444(7) Uani 1 1 d . . . . .
H26A H 0.088243 0.284230 0.219773 0.067 Uiso 1 1 calc R U . . .
H26B H 0.084856 0.422525 0.243055 0.067 Uiso 1 1 calc R U . . .
H26C H 0.143455 0.348508 0.255570 0.067 Uiso 1 1 calc R U . . .
 
loop_
 _atom_site_aniso_label
 _atom_site_aniso_U_11
 _atom_site_aniso_U_22
 _atom_site_aniso_U_33
 _atom_site_aniso_U_23
 _atom_site_aniso_U_13
 _atom_site_aniso_U_12
Br1 0.02844(12) 0.01906(9) 0.03268(13) -0.00030(9) 0.00402(11) 0.00009(10)
Ga1 0.02796(13) 0.01736(10) 0.01745(11) -0.00156(9) 0.00135(11) 0.00331(11)
Si1 0.0337(5) 0.0186(4) 0.0154(4) 0.000 0.0022(4) 0.000
O1 0.051(3) 0.087(4) 0.030(2) -0.014(2) 0.009(2) -0.035(3)
C30 0.035(3) 0.050(3) 0.013(2) -0.001(2) 0.004(2) -0.008(3)
N1 0.0281(11) 0.0227(9) 0.0169(9) 0.0023(7) 0.0017(8) 0.0007(8)
N2 0.0239(10) 0.0213(8) 0.0360(12) -0.0093(8) 0.0025(8) -0.0013(8)
C1 0.0374(14) 0.0260(11) 0.0198(12) 0.0011(9) -0.0003(10) -0.0106(10)
C2 0.0457(15) 0.0281(11) 0.0202(12) -0.0076(10) 0.0140(11) -0.0095(11)
C3 0.0391(14) 0.0198(10) 0.0444(16) -0.0073(10) 0.0208(13) -0.0044(11)
C4 0.0526(17) 0.0482(16) 0.0226(17) 0.0072(13) -0.0051(14) -0.0126(15)
C5 0.056(2) 0.0434(17) 0.088(3) -0.0056(18) 0.046(2) -0.0014(15)
C6 0.0345(14) 0.0280(11) 0.0277(13) 0.0063(10) 0.0047(11) 0.0086(11)
C7 0.0303(13) 0.0355(13) 0.0332(15) 0.0061(12) 0.0053(11) 0.0086(11)
C8 0.0401(17) 0.0488(18) 0.051(2) 0.0045(16) 0.0109(15) 0.0151(14)
C9 0.051(2) 0.051(2) 0.067(3) 0.0037(19) 0.0087(18) 0.0292(18)
C10 0.061(2) 0.0318(15) 0.066(2) -0.0003(15) 0.0017(18) 0.0165(16)
C11 0.0487(17) 0.0265(12) 0.0489(18) 0.0044(12) 0.0032(15) 0.0082(13)
C12 0.0248(12) 0.0350(13) 0.0385(16) 0.0070(11) 0.0056(11) 0.0029(10)
C13 0.0341(16) 0.0502(18) 0.048(2) 0.0165(15) 0.0139(15) 0.0038(13)
C14 0.0290(14) 0.0471(16) 0.0514(19) 0.0047(16) 0.0055(13) -0.0007(13)
C15 0.075(7) 0.022(3) 0.022(4) 0.006(3) 0.014(6) 0.006(4)
C16 0.092(8) 0.026(4) 0.030(6) -0.008(4) 0.009(7) -0.001(4)
C17 0.136(13) 0.068(7) 0.031(5) 0.011(4) 0.014(6) -0.060(8)
C15' 0.046(4) 0.025(3) 0.048(7) 0.003(5) -0.013(6) -0.005(3)
C16' 0.090(12) 0.038(7) 0.044(8) 0.012(5) -0.025(7) -0.029(8)
C17' 0.077(6) 0.043(5) 0.054(6) 0.022(4) 0.005(5) -0.006(4)
C18' 0.024(3) 0.021(3) 0.019(4) -0.004(3) 0.006(3) -0.006(2)
C19' 0.027(4) 0.028(4) 0.009(5) -0.001(3) 0.006(3) -0.004(3)
C20' 0.041(4) 0.037(5) 0.032(7) 0.001(4) -0.005(4) -0.002(4)
C21' 0.032(4) 0.046(4) 0.040(6) -0.002(4) -0.009(4) -0.003(3)
C22' 0.036(3) 0.040(3) 0.040(4) -0.002(3) -0.001(3) -0.009(3)
C23' 0.028(3) 0.026(2) 0.036(3) -0.005(2) 0.006(3) -0.004(2)
C27' 0.031(3) 0.025(3) 0.057(4) -0.003(3) -0.004(3) -0.011(2)
C28' 0.106(8) 0.046(5) 0.024(4) 0.012(4) 0.004(4) 0.005(6)
C29' 0.073(5) 0.029(3) 0.077(6) -0.006(3) 0.029(4) 0.010(3)
C18 0.025(3) 0.023(3) 0.023(4) -0.005(3) 0.008(4) -0.004(2)
C19 0.025(3) 0.027(4) 0.011(5) -0.003(3) 0.010(3) -0.004(3)
C20 0.024(3) 0.031(4) 0.023(5) -0.004(4) -0.001(3) 0.002(3)
C21 0.027(3) 0.043(4) 0.038(6) -0.015(3) 0.001(3) -0.014(3)
C22 0.031(3) 0.036(3) 0.044(4) -0.009(3) 0.011(3) -0.012(2)
C23 0.025(3) 0.032(3) 0.041(3) -0.009(3) 0.012(3) -0.011(2)
C27 0.032(3) 0.032(4) 0.072(7) 0.011(4) 0.011(4) -0.010(3)
C28 0.063(5) 0.085(6) 0.048(4) 0.017(4) 0.004(4) -0.003(5)
C29 0.122(8) 0.026(3) 0.083(7) 0.006(4) 0.031(6) 0.000(4)
C24 0.0291(13) 0.0319(13) 0.0277(13) -0.0068(11) -0.0012(11) 0.0066(10)
C25 0.0309(13) 0.0401(14) 0.0343(15) -0.0119(12) -0.0068(13) 0.0125(12)
C26 0.0454(17) 0.0500(17) 0.0354(16) 0.0000(13) 0.0003(13) 0.0098(14)
 
_geom_special_details
;
 All esds (except the esd in the dihedral angle between two l.s. planes)
 are estimated using the full covariance matrix.  The cell esds are taken
 into account individually in the estimation of esds in distances, angles
 and torsion angles; correlations between esds in cell parameters are only
 used when they are defined by crystal symmetry.  An approximate (isotropic)
 treatment of cell esds is used for estimating esds involving l.s. planes.
;
 
loop_
 _geom_bond_atom_site_label_1
 _geom_bond_atom_site_label_2
 _geom_bond_distance
 _geom_bond_site_symmetry_2
 _geom_bond_publ_flag
Br1 Ga1 2.3777(3) . ?
Ga1 N2 1.952(2) . ?
Ga1 N1 1.9623(19) . ?
Ga1 Si1 2.4203(5) . ?
Si1 C30 1.865(6) 2 ?
Si1 C30 1.865(6) . ?
O1 C30 1.136(7) . ?
N1 C1 1.336(3) . ?
N1 C6 1.458(3) . ?
N2 C3 1.338(3) . ?
N2 C18 1.428(11) . ?
N2 C18' 1.520(11) . ?
C1 C2 1.381(4) . ?
C1 C4 1.519(4) . ?
C2 C3 1.404(4) . ?
C3 C5 1.497(4) . ?
C6 C7 1.400(4) . ?
C6 C11 1.404(4) . ?
C7 C8 1.398(4) . ?
C7 C12 1.513(4) . ?
C8 C9 1.366(5) . ?
C9 C10 1.373(5) . ?
C10 C11 1.395(5) . ?
C11 C15 1.519(18) . ?
C11 C15' 1.553(16) . ?
C12 C13 1.531(4) . ?
C12 C14 1.548(4) . ?
C15 C17 1.519(11) . ?
C15 C16 1.544(13) . ?
C15' C16' 1.502(15) . ?
C15' C17' 1.554(12) . ?
C18' C23' 1.395(9) . ?
C18' C19' 1.396(9) . ?
C19' C20' 1.409(10) . ?
C19' C24 1.427(16) . ?
C20' C21' 1.381(10) . ?
C21' C22' 1.392(9) . ?
C22' C23' 1.395(7) . ?
C23' C27' 1.511(8) . ?
C27' C28' 1.511(10) . ?
C27' C29' 1.546(10) . ?
C18 C23 1.407(9) . ?
C18 C19 1.407(9) . ?
C19 C20 1.407(10) . ?
C19 C24 1.617(14) . ?
C20 C21 1.391(9) . ?
C21 C22 1.372(9) . ?
C22 C23 1.408(7) . ?
C23 C27 1.504(11) . ?
C27 C29 1.484(13) . ?
C27 C28 1.539(12) . ?
C24 C26 1.524(4) . ?
C24 C25 1.539(4) . ?
 
loop_
 _geom_angle_atom_site_label_1
 _geom_angle_atom_site_label_2
 _geom_angle_atom_site_label_3
 _geom_angle
 _geom_angle_site_symmetry_1
 _geom_angle_site_symmetry_3
 _geom_angle_publ_flag
N2 Ga1 N1 95.86(9) . . ?
N2 Ga1 Br1 102.09(6) . . ?
N1 Ga1 Br1 102.37(6) . . ?
N2 Ga1 Si1 118.39(6) . . ?
N1 Ga1 Si1 111.58(6) . . ?
Br1 Ga1 Si1 122.37(2) . . ?
C30 Si1 C30 170.7(4) 2 . ?
C30 Si1 Ga1 91.47(15) 2 . ?
C30 Si1 Ga1 92.97(15) . . ?
C30 Si1 Ga1 92.97(15) 2 2 ?
C30 Si1 Ga1 91.47(15) . 2 ?
Ga1 Si1 Ga1 122.73(4) . 2 ?
O1 C30 Si1 172.7(6) . . ?
C1 N1 C6 118.6(2) . . ?
C1 N1 Ga1 117.91(17) . . ?
C6 N1 Ga1 123.16(16) . . ?
C3 N2 C18 109.6(4) . . ?
C3 N2 C18' 125.9(4) . . ?
C3 N2 Ga1 117.67(17) . . ?
C18 N2 Ga1 132.7(3) . . ?
C18' N2 Ga1 116.0(3) . . ?
N1 C1 C2 124.1(2) . . ?
N1 C1 C4 119.3(2) . . ?
C2 C1 C4 116.6(2) . . ?
C1 C2 C3 128.2(2) . . ?
N2 C3 C2 123.7(2) . . ?
N2 C3 C5 119.6(3) . . ?
C2 C3 C5 116.6(3) . . ?
C7 C6 C11 121.4(3) . . ?
C7 C6 N1 120.0(2) . . ?
C11 C6 N1 118.6(3) . . ?
C8 C7 C6 117.7(3) . . ?
C8 C7 C12 118.5(3) . . ?
C6 C7 C12 123.8(2) . . ?
C9 C8 C7 121.6(3) . . ?
C8 C9 C10 120.1(3) . . ?
C9 C10 C11 121.2(3) . . ?
C10 C11 C6 117.9(3) . . ?
C10 C11 C15 118.8(6) . . ?
C6 C11 C15 122.9(6) . . ?
C10 C11 C15' 119.2(6) . . ?
C6 C11 C15' 121.6(6) . . ?
C7 C12 C13 110.4(3) . . ?
C7 C12 C14 112.3(2) . . ?
C13 C12 C14 109.6(2) . . ?
C11 C15 C17 106.0(10) . . ?
C11 C15 C16 117.1(15) . . ?
C17 C15 C16 111.4(11) . . ?
C16' C15' C11 106.3(12) . . ?
C16' C15' C17' 107.5(11) . . ?
C11 C15' C17' 115.9(10) . . ?
C23' C18' C19' 122.8(10) . . ?
C23' C18' N2 115.5(7) . . ?
C19' C18' N2 121.4(9) . . ?
C18' C19' C20' 118.5(12) . . ?
C18' C19' C24 122.8(11) . . ?
C20' C19' C24 118.2(10) . . ?
C21' C20' C19' 118.7(12) . . ?
C20' C21' C22' 121.8(10) . . ?
C21' C22' C23' 120.5(7) . . ?
C18' C23' C22' 117.3(7) . . ?
C18' C23' C27' 123.8(6) . . ?
C22' C23' C27' 118.9(5) . . ?
C28' C27' C23' 112.2(7) . . ?
C28' C27' C29' 111.2(6) . . ?
C23' C27' C29' 112.9(6) . . ?
C23 C18 C19 121.8(10) . . ?
C23 C18 N2 120.9(8) . . ?
C19 C18 N2 117.3(8) . . ?
C20 C19 C18 118.1(12) . . ?
C20 C19 C24 118.0(8) . . ?
C18 C19 C24 123.8(10) . . ?
C21 C20 C19 120.1(11) . . ?
C22 C21 C20 120.7(9) . . ?
C21 C22 C23 121.4(7) . . ?
C18 C23 C22 117.3(7) . . ?
C18 C23 C27 123.6(7) . . ?
C22 C23 C27 118.8(5) . . ?
C29 C27 C23 114.6(9) . . ?
C29 C27 C28 110.0(7) . . ?
C23 C27 C28 109.7(7) . . ?
C19' C24 C26 105.4(5) . . ?
C19' C24 C25 114.4(6) . . ?
C26 C24 C25 110.3(2) . . ?
C26 C24 C19 117.2(5) . . ?
C25 C24 C19 108.3(5) . . ?
 
_refine_diff_density_max    0.516
_refine_diff_density_min   -0.669
_refine_diff_density_rms    0.091

_shelx_res_file
;
TITL jus_132_a2_tw4 in C2/c
    jus_132_a2_tw5.res
    created by SHELXL-2017/1 at 13:07:08 on 27-Jun-2019
CELL 0.71073  23.9753  10.8256  23.4438  90.000  99.840  90.000
ZERR    4.00   0.0015   0.0007   0.0016   0.000   0.004   0.000
LATT  7
SYMM -X, Y, 0.5-Z
SFAC C H O SI br GA N
UNIT 236 328 4 4 8 8 16
LIST 6 ! automatically inserted. Change 6 to 4 for CHECKCIF!!
TEMP -173.160
SIZE 0.074 0.118 0.167
L.S. 16
ACTA
FMAP 2
PLAN 10
SADI c18 c19 c19 c20 c20 c21 c21 c22 c22 c23 c23 c18 =
     C18' C19' C19' C20' C20' C21' C21' C22' C22' C23' C23' C18'
RIGU c18 c19 c20 c21 c22 c23 c18' c19' c20' c21' c22' c23' c15 c16 c17 =
  C15' C16' C17'

WGHT    0.041800
BASF   0.51600
FVAR       0.15888
BR1   5   -0.031251    0.430425    0.145237    11.00000    0.02844    0.01906 =
         0.03268   -0.00030    0.00402    0.00009
GA1   6   -0.001459    0.639375    0.159142    11.00000    0.02796    0.01736 =
         0.01745   -0.00156    0.00135    0.00331
SI1   4    0.000000    0.746511    0.250000    10.50000    0.03373    0.01858 =
         0.01535    0.00000    0.00218    0.00000
PART 1 10.5
O1    3    0.125736    0.782172    0.271507    10.50000    0.05133    0.08727 =
         0.02992   -0.01384    0.00931   -0.03482
C30   1    0.078707    0.760431    0.263660    10.50000    0.03477    0.04972 =
         0.01278   -0.00087    0.00383   -0.00809
PART 0
N1    7   -0.049942    0.723968    0.095046    11.00000    0.02810    0.02268 =
         0.01693    0.00226    0.00165    0.00074
N2    7    0.066837    0.641850    0.124239    11.00000    0.02388    0.02129 =
         0.03602   -0.00932    0.00251   -0.00128
C1    1   -0.039778    0.704805    0.041487    11.00000    0.03742    0.02601 =
         0.01981    0.00108   -0.00034   -0.01063
C2    1    0.009086    0.651350    0.029109    11.00000    0.04573    0.02813 =
         0.02019   -0.00759    0.01400   -0.00950
AFIX  43
H2    2    0.007687    0.624523   -0.009692    11.00000   -1.20000
AFIX   0
C3    1    0.060556    0.631653    0.066622    11.00000    0.03911    0.01978 =
         0.04441   -0.00730    0.02076   -0.00444
C4    1   -0.082892    0.747378   -0.009894    11.00000    0.05262    0.04816 =
         0.02255    0.00716   -0.00510   -0.01256
AFIX 137
H4A   2   -0.088606    0.836700   -0.007281    11.00000   -1.50000
H4B   2   -0.118883    0.704604   -0.009694    11.00000   -1.50000
H4C   2   -0.069010    0.728305   -0.045863    11.00000   -1.50000
AFIX   0
C5    1    0.110705    0.600909    0.039041    11.00000    0.05580    0.04341 =
         0.08795   -0.00557    0.04558   -0.00136
AFIX 137
H5A   2    0.100185    0.607129   -0.003131    11.00000   -1.50000
H5B   2    0.123268    0.516546    0.049577    11.00000   -1.50000
H5C   2    0.141496    0.658923    0.052618    11.00000   -1.50000
AFIX   0
C6    1   -0.099802    0.795255    0.102392    11.00000    0.03447    0.02803 =
         0.02771    0.00625    0.00472    0.00865
C7    1   -0.152586    0.737092    0.097389    11.00000    0.03027    0.03549 =
         0.03316    0.00612    0.00526    0.00859
C8    1   -0.199233    0.810124    0.103767    11.00000    0.04011    0.04879 =
         0.05136    0.00455    0.01088    0.01510
AFIX  43
H8    2   -0.235395    0.772519    0.101028    11.00000   -1.20000
AFIX   0
C9    1   -0.194068    0.934233    0.113840    11.00000    0.05125    0.05062 =
         0.06712    0.00374    0.00873    0.02916
AFIX  43
H9    2   -0.226595    0.982184    0.116963    11.00000   -1.20000
AFIX   0
C10   1   -0.141908    0.989773    0.119458    11.00000    0.06138    0.03182 =
         0.06617   -0.00033    0.00166    0.01653
AFIX  43
H10   2   -0.138694    1.075858    0.127192    11.00000   -1.20000
AFIX   0
C11   1   -0.093556    0.922152    0.114022    11.00000    0.04866    0.02652 =
         0.04886    0.00440    0.00323    0.00821
C12   1   -0.161796    0.600423    0.085895    11.00000    0.02480    0.03500 =
         0.03848    0.00703    0.00561    0.00289
AFIX  13
H12   2   -0.125708    0.564448    0.077329    11.00000   -1.20000
AFIX   0
C13   1   -0.176263    0.535561    0.139532    11.00000    0.03410    0.05018 =
         0.04845    0.01655    0.01386    0.00380
AFIX 137
H13A  2   -0.212259    0.567483    0.147888    11.00000   -1.50000
H13B  2   -0.146224    0.551215    0.172693    11.00000   -1.50000
H13C  2   -0.179566    0.446463    0.132351    11.00000   -1.50000
AFIX   0
C14   1   -0.208999    0.575145    0.033385    11.00000    0.02897    0.04711 =
         0.05139    0.00468    0.00547   -0.00068
AFIX 137
H14A  2   -0.201380    0.622476   -0.000079    11.00000   -1.50000
H14B  2   -0.245638    0.600152    0.042829    11.00000   -1.50000
H14C  2   -0.209872    0.486800    0.024155    11.00000   -1.50000
AFIX   0
PART 1 10.5
C15   1   -0.036254    0.985471    0.127197    10.50000    0.07484    0.02156 =
         0.02220    0.00629    0.01415    0.00565
AFIX  13
H15   2   -0.007135    0.919512    0.137845    10.50000   -1.20000
AFIX   0
C16   1   -0.027722    1.081653    0.176540    10.50000    0.09177    0.02559 =
         0.02965   -0.00762    0.00941   -0.00054
AFIX 137
H16A  2   -0.054167    1.150381    0.166425    10.50000   -1.50000
H16B  2    0.011214    1.112788    0.182128    10.50000   -1.50000
H16C  2   -0.034798    1.042847    0.212391    10.50000   -1.50000
AFIX   0
C17   1   -0.026261    1.041743    0.070439    10.50000    0.13604    0.06803 =
         0.03131    0.01065    0.01359   -0.06010
AFIX 137
H17A  2   -0.023525    0.975769    0.042426    10.50000   -1.50000
H17B  2    0.009051    1.089247    0.077043    10.50000   -1.50000
H17C  2   -0.057864    1.096514    0.055234    10.50000   -1.50000
AFIX   0
PART 2 10.5
C15'  1   -0.038203    0.991976    0.108252    10.50000    0.04597    0.02453 =
         0.04844    0.00345   -0.01349   -0.00465
AFIX  13
H15'  2   -0.007229    0.930423    0.107542    10.50000   -1.20000
AFIX   0
C16'  1   -0.023838    1.070384    0.161594    10.50000    0.09014    0.03774 =
         0.04384    0.01239   -0.02474   -0.02903
AFIX 137
H16D  2    0.011503    1.115095    0.160486    10.50000   -1.50000
H16E  2   -0.019205    1.017533    0.196019    10.50000   -1.50000
H16F  2   -0.054440    1.129687    0.163081    10.50000   -1.50000
AFIX   0
C17'  1   -0.041516    1.078659    0.054963    10.50000    0.07713    0.04271 =
         0.05417    0.02240    0.00475   -0.00600
AFIX 137
H17D  2   -0.055130    1.031879    0.019529    10.50000   -1.50000
H17E  2   -0.003827    1.112049    0.053335    10.50000   -1.50000
H17F  2   -0.067680    1.146730    0.058411    10.50000   -1.50000
AFIX   0
PART 0
PART 2 10.5
C18'  1    0.122693    0.640511    0.166173    10.50000    0.02398    0.02128 =
         0.01936   -0.00444    0.00601   -0.00567
C19'  1    0.149241    0.529804    0.185551    10.50000    0.02699    0.02849 =
         0.00949   -0.00094    0.00602   -0.00375
C20'  1    0.205763    0.533853    0.214484    10.50000    0.04134    0.03654 =
         0.03170    0.00059   -0.00463   -0.00245
AFIX  43
H20'  2    0.225607    0.459886    0.226650    10.50000   -1.20000
AFIX   0
C21'  1    0.231778    0.647405    0.224826    10.50000    0.03163    0.04646 =
         0.04012   -0.00208   -0.00875   -0.00326
AFIX  43
H21'  2    0.270380    0.650549    0.242846    10.50000   -1.20000
AFIX   0
C22'  1    0.202982    0.757364    0.209569    10.50000    0.03567    0.04048 =
         0.03996   -0.00194   -0.00089   -0.00906
AFIX  43
H22'  2    0.221098    0.834081    0.220074    10.50000   -1.20000
AFIX   0
C23'  1    0.147727    0.755746    0.178971    10.50000    0.02824    0.02625 =
         0.03596   -0.00549    0.00622   -0.00448
C27'  1    0.117880    0.877114    0.163224    10.50000    0.03074    0.02453 =
         0.05721   -0.00279   -0.00412   -0.01075
AFIX  13
H27'  2    0.076348    0.859388    0.157036    10.50000   -1.20000
AFIX   0
C28'  1    0.130456    0.928755    0.106920    10.50000    0.10611    0.04627 =
         0.02363    0.01213    0.00372    0.00518
AFIX 137
H28A  2    0.118337    0.869495    0.075656    10.50000   -1.50000
H28B  2    0.171220    0.943591    0.110387    10.50000   -1.50000
H28C  2    0.109971    1.006680    0.098189    10.50000   -1.50000
AFIX   0
C29'  1    0.129529    0.973848    0.212312    10.50000    0.07336    0.02937 =
         0.07737   -0.00602    0.02867    0.00960
AFIX 137
H29A  2    0.170011    0.993585    0.220084    10.50000   -1.50000
H29B  2    0.118166    0.940284    0.247422    10.50000   -1.50000
H29C  2    0.107797    1.049008    0.200553    10.50000   -1.50000
AFIX   0
PART 1 10.5
C18   1    0.125558    0.652987    0.148086    10.50000    0.02537    0.02273 =
         0.02348   -0.00470    0.00775   -0.00396
C19   1    0.153256    0.546828    0.173379    10.50000    0.02486    0.02667 =
         0.01135   -0.00276    0.01028   -0.00380
C20   1    0.208035    0.560492    0.205605    10.50000    0.02412    0.03082 =
         0.02253   -0.00374   -0.00061    0.00225
AFIX  43
H20   2    0.226255    0.492175    0.226390    10.50000   -1.20000
AFIX   0
C21   1    0.235579    0.673793    0.207104    10.50000    0.02745    0.04279 =
         0.03822   -0.01529    0.00077   -0.01405
AFIX  43
H21   2    0.272882    0.681837    0.228302    10.50000   -1.20000
AFIX   0
C22   1    0.209460    0.774091    0.178298    10.50000    0.03085    0.03623 =
         0.04381   -0.00923    0.01064   -0.01216
AFIX  43
H22   2    0.229368    0.850139    0.179232    10.50000   -1.20000
AFIX   0
C23   1    0.153782    0.766740    0.147378    10.50000    0.02536    0.03245 =
         0.04065   -0.00945    0.01213   -0.01123
C27   1    0.126181    0.882019    0.120057    10.50000    0.03206    0.03188 =
         0.07174    0.01112    0.01054   -0.00975
AFIX  13
H27   2    0.087125    0.859263    0.100569    10.50000   -1.20000
AFIX   0
C28   1    0.158550    0.928273    0.072904    10.50000    0.06282    0.08485 =
         0.04765    0.01690    0.00354   -0.00286
AFIX 137
H28D  2    0.160952    0.861750    0.045076    10.50000   -1.50000
H28E  2    0.196795    0.953590    0.090798    10.50000   -1.50000
H28F  2    0.138515    0.998932    0.052812    10.50000   -1.50000
AFIX   0
C29   1    0.120685    0.983157    0.161467    10.50000    0.12164    0.02634 =
         0.08313    0.00565    0.03094   -0.00016
AFIX 137
H29D  2    0.102514    1.054641    0.140331    10.50000   -1.50000
H29E  2    0.158334    1.006741    0.181819    10.50000   -1.50000
H29F  2    0.097578    0.954878    0.189596    10.50000   -1.50000
AFIX   0
PART 0
C24   1    0.124175    0.411791    0.171258    11.00000    0.02911    0.03193 =
         0.02775   -0.00678   -0.00119    0.00663
PART 2 10.5
AFIX  13
H24'  2    0.088641    0.423301    0.142482    10.50000   -1.20000
AFIX  13
PART 1 10.5
H24   2    0.088131    0.416943    0.142716    10.50000   -1.20000
AFIX   0
PART 0
C25   1    0.162664    0.319592    0.146483    11.00000    0.03092    0.04014 =
         0.03432   -0.01193   -0.00684    0.01248
AFIX 137
H25A  2    0.142540    0.241196    0.137891    11.00000   -1.50000
H25B  2    0.197084    0.305561    0.174917    11.00000   -1.50000
H25C  2    0.172878    0.353307    0.110863    11.00000   -1.50000
AFIX   0
C26   1    0.108812    0.362353    0.227424    11.00000    0.04537    0.05004 =
         0.03535    0.00001    0.00027    0.00984
AFIX 137
H26A  2    0.088243    0.284230    0.219773    11.00000   -1.50000
H26B  2    0.084856    0.422525    0.243055    11.00000   -1.50000
H26C  2    0.143455    0.348508    0.255570    11.00000   -1.50000
AFIX   0
HKLF 5


REM  jus_132_a2_tw4 in C2/c
REM R1 =  0.0373 for    7680 Fo > 4sig(Fo)  and  0.0656 for all   10218 data
REM    444 parameters refined using    156 restraints

END

WGHT      0.0404      0.0000

REM Highest difference peak  0.516,  deepest hole -0.669,  1-sigma level  0.091
Q1    1  -0.0136  0.6973  0.1720  11.00000  0.05    0.52
Q2    1  -0.0573  0.3858  0.1091  11.00000  0.05    0.51
Q3    1   0.0127  0.5742  0.1476  11.00000  0.05    0.51
Q4    1  -0.0462  0.4821  0.1621  11.00000  0.05    0.51
Q5    1  -0.0149  0.4361  0.1700  11.00000  0.05    0.50
Q6    1  -0.0007  0.7015  0.1579  11.00000  0.05    0.50
Q7    1  -0.0419  0.3651  0.1517  11.00000  0.05    0.48
Q8    1  -0.0155  0.3707  0.1255  11.00000  0.05    0.47
Q9    1  -0.0247  0.6856  0.1184  11.00000  0.05    0.46
Q10   1  -0.0072  0.5785  0.1603  11.00000  0.05    0.45
;
_shelx_res_checksum   24382

_shelx_hkl_file
;
   2   0   0 4566.52 112.576   2
   4   0   0 212.212 8.12080  -1
  -4   0   1 212.212 8.12080   2
   6   0   0 7717.89 103.920  -1
  -6   0   2 7717.89 103.920   2
   8   0   0 846.634 31.1522  -1
  -8   0   3 846.634 31.1522   2
  10   0   0 168.526 5.79560  -1
 -10   0   3 168.526 5.79560   2
  12   0   0 263.777 3.63486  -1
 -12   0   4 263.777 3.63486   2
  14   0   0 52.1780 4.08440  -1
 -14   0   5 52.1780 4.08440   2
  16   0   0 1.27583 4.01792  -1
 -16   0   5 1.27583 4.01792   2
  18   0   0 72.8543 2.38743  -1
 -18   0   6 72.8543 2.38743   2
  20   0   0 59.0964 3.38387  -1
 -20   0   7 59.0964 3.38387   2
  22   0   0 -1.5542 3.20976  -1
 -22   0   7 -1.5542 3.20976   2
  24   0   0 187.765 4.97256  -1
 -24   0   8 187.765 4.97256   2
  26   0   0 149.011 6.86505  -1
 -26   0   9 149.011 6.86505   2
  28   0   0 78.5156 7.19351  -1
 -28   0   9 78.5156 7.19351   2
   1   1   0 1862.88 33.4206   2
   3   1   0 487.344 5.95328  -1
  -3   1   1 487.344 5.95328   2
   5   1   0 1419.34 56.5330  -1
  -5   1   2 1419.34 56.5330   2
   7   1   0 895.084 36.6448  -1
  -7   1   2 895.084 36.6448   2
   9   1   0 55.9258 0.87046  -1
  -9   1   3 55.9258 0.87046   2
  11   1   0 97.5735 3.60718  -1
 -11   1   4 97.5735 3.60718   2
  13   1   0 73.6109 2.54799  -1
 -13   1   4 73.6109 2.54799   2
  15   1   0 357.392 3.63514  -1
 -15   1   5 357.392 3.63514   2
  17   1   0 40.6291 2.08118  -1
 -17   1   6 40.6291 2.08118   2
  19   1   0 8.59670 2.31960  -1
 -19   1   6 8.59670 2.31960   2
  21   1   0 56.2238 2.01100  -1
 -21   1   7 56.2238 2.01100   2
  23   1   0 24.7821 3.38997  -1
 -23   1   8 24.7821 3.38997   2
  25   1   0 55.1912 4.16926  -1
 -25   1   8 55.1912 4.16926   2
  27   1   0 39.1455 3.32475  -1
 -27   1   9 39.1455 3.32475   2
  29   1   0 97.2818 7.47934  -1
 -29   1  10 97.2818 7.47934   2
  31   1   0 50.8780 12.0682  -1
 -31   1  10 50.8780 12.0682   2
  33   1   0 30.6573 9.66072  -1
 -33   1  11 30.6573 9.66072   2
   0   2   0 298.495 6.91208  -1
   0   2   0 298.495 6.91208   2
   2   2   0 53.7428 4.40726  -1
  -2   2   1 53.7428 4.40726   2
   4   2   0 61.8999 5.25396  -1
  -4   2   1 61.8999 5.25396   2
   6   2   0 506.906 7.35125  -1
  -6   2   2 506.906 7.35125   2
   8   2   0 91.9214 4.80965  -1
  -8   2   3 91.9214 4.80965   2
  10   2   0 118.593 4.39468  -1
 -10   2   3 118.593 4.39468   2
  12   2   0 433.829 4.36305  -1
 -12   2   4 433.829 4.36305   2
  14   2   0 1357.58 19.2908  -1
 -14   2   5 1357.58 19.2908   2
  16   2   0 693.897 10.5502  -1
 -16   2   5 693.897 10.5502   2
  18   2   0 219.789 2.99898  -1
 -18   2   6 219.789 2.99898   2
  20   2   0 479.661 8.14769  -1
 -20   2   7 479.661 8.14769   2
  22   2   0 235.806 6.18856  -1
 -22   2   7 235.806 6.18856   2
  24   2   0 15.6960 2.53699  -1
 -24   2   8 15.6960 2.53699   2
  26   2   0 8.31891 3.56946  -1
 -26   2   9 8.31891 3.56946   2
  28   2   0 0.82932 4.81220  -1
 -28   2   9 0.82932 4.81220   2
  30   2   0 -1.7542 3.24287  -1
 -30   2  10 -1.7542 3.24287   2
  32   2   0 6.86103 8.11014  -1
 -32   2  11 6.86103 8.11014   2
  34   2   0 -3.4347 13.2917  -1
 -34   2  11 -3.4347 13.2917   2
   1   3   0 3424.78 134.652  -1
   1   3   0 3424.78 134.652   2
   3   3   0 3623.28 36.7286  -1
  -3   3   1 3623.28 36.7286   2
   5   3   0 179.681 9.80351  -1
  -5   3   2 179.681 9.80351   2
   7   3   0 711.825 20.6131  -1
  -7   3   2 711.825 20.6131   2
   9   3   0 1238.72 12.8477  -1
  -9   3   3 1238.72 12.8477   2
  11   3   0 139.781 5.18105  -1
 -11   3   4 139.781 5.18105   2
  13   3   0 643.270 13.6929  -1
 -13   3   4 643.270 13.6929   2
  15   3   0 820.160 8.90839  -1
 -15   3   5 820.160 8.90839   2
  17   3   0 623.115 11.9192  -1
 -17   3   6 623.115 11.9192   2
  19   3   0 257.987 6.10101  -1
 -19   3   6 257.987 6.10101   2
  21   3   0 294.127 4.78568  -1
 -21   3   7 294.127 4.78568   2
  23   3   0 72.1346 3.47520  -1
 -23   3   8 72.1346 3.47520   2
  25   3   0 46.5815 3.85369  -1
 -25   3   8 46.5815 3.85369   2
  27   3   0 49.9728 3.46810  -1
 -27   3   9 49.9728 3.46810   2
  29   3   0 16.4242 5.90572  -1
 -29   3  10 16.4242 5.90572   2
  31   3   0 12.6887 6.37865  -1
 -31   3  10 12.6887 6.37865   2
  33   3   0 11.6845 5.04925  -1
 -33   3  11 11.6845 5.04925   2
  35   3   0 2.72679 14.5075  -1
 -35   3  12 2.72679 14.5075   2
   0   4   0 710.281 13.9005  -1
   0   4   0 710.281 13.9005   2
   2   4   0 1735.29 47.4465  -1
  -2   4   1 1735.29 47.4465   2
   4   4   0 1520.74 41.8676  -1
  -4   4   1 1520.74 41.8676   2
   6   4   0 63.3268 1.52690  -1
  -6   4   2 63.3268 1.52690   2
   8   4   0 921.385 23.5089  -1
  -8   4   3 921.385 23.5089   2
  10   4   0 604.417 14.5057  -1
 -10   4   3 604.417 14.5057   2
  12   4   0 274.828 3.45235  -1
 -12   4   4 274.828 3.45235   2
  14   4   0 92.4001 3.12069  -1
 -14   4   5 92.4001 3.12069   2
  16   4   0 263.500 5.98997  -1
 -16   4   5 263.500 5.98997   2
  18   4   0 266.373 4.42590  -1
 -18   4   6 266.373 4.42590   2
  20   4   0 73.4060 4.18517  -1
 -20   4   7 73.4060 4.18517   2
  22   4   0 26.1191 4.32731  -1
 -22   4   7 26.1191 4.32731   2
  24   4   0 31.7092 2.73442  -1
 -24   4   8 31.7092 2.73442   2
  26   4   0 61.9892 4.57824  -1
 -26   4   9 61.9892 4.57824   2
  28   4   0 50.9872 8.75150  -1
 -28   4   9 50.9872 8.75150   2
  30   4   0 48.6418 6.47448  -1
 -30   4  10 48.6418 6.47448   2
  32   4   0 43.8298 9.68121  -1
 -32   4  11 43.8298 9.68121   2
  34   4   0 27.9771 15.5327  -1
 -34   4  11 27.9771 15.5327   2
   1   5   0 942.760 20.0517  -1
   1   5   0 942.760 20.0517   2
   3   5   0 1250.12 11.5654  -1
  -3   5   1 1250.12 11.5654   2
   5   5   0 52.8869 3.65805  -1
  -5   5   2 52.8869 3.65805   2
   7   5   0 299.602 8.00533  -1
  -7   5   2 299.602 8.00533   2
   9   5   0 165.480 2.28502  -1
  -9   5   3 165.480 2.28502   2
  11   5   0 22.0738 3.68118  -1
 -11   5   4 22.0738 3.68118   2
  13   5   0 42.9189 3.10643  -1
 -13   5   4 42.9189 3.10643   2
  15   5   0 39.9976 1.64022  -1
 -15   5   5 39.9976 1.64022   2
  17   5   0 30.3356 2.75940  -1
 -17   5   6 30.3356 2.75940   2
  19   5   0 15.2757 2.98207  -1
 -19   5   6 15.2757 2.98207   2
  21   5   0 17.1506 2.81620  -1
 -21   5   7 17.1506 2.81620   2
  23   5   0 4.09368 4.20816  -1
 -23   5   8 4.09368 4.20816   2
  25   5   0 3.99073 4.91602  -1
 -25   5   8 3.99073 4.91602   2
  27   5   0 28.5979 4.02821  -1
 -27   5   9 28.5979 4.02821   2
  29   5   0 32.7032 8.47615  -1
 -29   5  10 32.7032 8.47615   2
  31   5   0 9.13354 8.89830  -1
 -31   5  10 9.13354 8.89830   2
  33   5   0 48.0927 12.9684  -1
 -33   5  11 48.0927 12.9684   2
   0   6   0 742.629 8.81132  -1
   0   6   0 742.629 8.81132   2
   2   6   0 437.602 7.29255  -1
  -2   6   1 437.602 7.29255   2
   4   6   0 173.952 4.19949  -1
  -4   6   1 173.952 4.19949   2
   6   6   0 506.761 4.68830  -1
  -6   6   2 506.761 4.68830   2
   8   6   0 126.491 4.30814  -1
  -8   6   3 126.491 4.30814   2
  10   6   0 107.151 3.33665  -1
 -10   6   3 107.151 3.33665   2
  12   6   0 626.897 6.72944  -1
 -12   6   4 626.897 6.72944   2
  14   6   0 207.551 4.30083  -1
 -14   6   5 207.551 4.30083   2
  16   6   0 331.346 5.62764  -1
 -16   6   5 331.346 5.62764   2
  18   6   0 517.988 8.42220  -1
 -18   6   6 517.988 8.42220   2
  20   6   0 47.7129 4.42683  -1
 -20   6   7 47.7129 4.42683   2
  22   6   0 55.0723 4.93620  -1
 -22   6   7 55.0723 4.93620   2
  24   6   0 35.4114 3.53283  -1
 -24   6   8 35.4114 3.53283   2
  26   6   0 23.4567 5.43415  -1
 -26   6   9 23.4567 5.43415   2
  28   6   0 1.10234 7.80199  -1
 -28   6   9 1.10234 7.80199   2
  30   6   0 5.13900 5.71665  -1
 -30   6  10 5.13900 5.71665   2
  32   6   0 20.8019 14.1752  -1
 -32   6  11 20.8019 14.1752   2
   1   7   0 25.0949 2.25407  -1
   1   7   0 25.0949 2.25407   2
   3   7   0 53.5620 1.21670  -1
  -3   7   1 53.5620 1.21670   2
   5   7   0 182.437 3.91866  -1
  -5   7   2 182.437 3.91866   2
   7   7   0 350.136 5.71339  -1
  -7   7   2 350.136 5.71339   2
   9   7   0 458.900 5.07125  -1
  -9   7   3 458.900 5.07125   2
  11   7   0 1267.52 16.5670  -1
 -11   7   4 1267.52 16.5670   2
  13   7   0 1032.47 12.7908  -1
 -13   7   4 1032.47 12.7908   2
  15   7   0 518.772 7.49201  -1
 -15   7   5 518.772 7.49201   2
  17   7   0 712.602 11.1397  -1
 -17   7   6 712.602 11.1397   2
  19   7   0 502.411 9.48035  -1
 -19   7   6 502.411 9.48035   2
  21   7   0 133.184 4.88599  -1
 -21   7   7 133.184 4.88599   2
  23   7   0 79.1127 5.92701  -1
 -23   7   8 79.1127 5.92701   2
  25   7   0 33.7553 6.11196  -1
 -25   7   8 33.7553 6.11196   2
  27   7   0 -7.3464 4.40371  -1
 -27   7   9 -7.3464 4.40371   2
  29   7   0 7.79208 8.52865  -1
 -29   7  10 7.79208 8.52865   2
  31   7   0 15.4635 14.2191  -1
 -31   7  10 15.4635 14.2191   2
  33   7   0 -4.6315 11.4933  -1
 -33   7  11 -4.6315 11.4933   2
   0   8   0 11.9977 1.45980  -1
   0   8   0 11.9977 1.45980   2
   2   8   0 52.2979 2.06621  -1
  -2   8   1 52.2979 2.06621   2
   4   8   0 82.8395 2.24140  -1
  -4   8   1 82.8395 2.24140   2
   6   8   0 88.6569 1.90283  -1
  -6   8   2 88.6569 1.90283   2
   8   8   0 197.335 3.52009  -1
  -8   8   3 197.335 3.52009   2
  10   8   0 134.949 3.32476  -1
 -10   8   3 134.949 3.32476   2
  12   8   0 419.446 5.30910  -1
 -12   8   4 419.446 5.30910   2
  14   8   0 499.354 8.08891  -1
 -14   8   5 499.354 8.08891   2
  16   8   0 458.885 7.79619  -1
 -16   8   5 458.885 7.79619   2
  18   8   0 365.394 6.46961  -1
 -18   8   6 365.394 6.46961   2
  20   8   0 104.187 5.17087  -1
 -20   8   7 104.187 5.17087   2
  22   8   0 60.2486 6.18309  -1
 -22   8   7 60.2486 6.18309   2
  24   8   0 37.9466 4.05601  -1
 -24   8   8 37.9466 4.05601   2
  26   8   0 23.5909 7.46970  -1
 -26   8   9 23.5909 7.46970   2
  28   8   0 -11.114 8.17494  -1
 -28   8   9 -11.114 8.17494   2
  30   8   0 0.74343 10.6635  -1
 -30   8  10 0.74343 10.6635   2
   1   9   0 195.381 3.43397  -1
   1   9   0 195.381 3.43397   2
   3   9   0 353.411 4.19014  -1
  -3   9   1 353.411 4.19014   2
   5   9   0 116.457 3.01981  -1
  -5   9   2 116.457 3.01981   2
   7   9   0 36.2218 2.49809  -1
  -7   9   2 36.2218 2.49809   2
   9   9   0 227.082 3.91515  -1
  -9   9   3 227.082 3.91515   2
  11   9   0 64.8070 2.86790  -1
 -11   9   4 64.8070 2.86790   2
  13   9   0 84.5598 3.01796  -1
 -13   9   4 84.5598 3.01796   2
  15   9   0 35.0836 2.16302  -1
 -15   9   5 35.0836 2.16302   2
  17   9   0 73.2910 4.52630  -1
 -17   9   6 73.2910 4.52630   2
  19   9   0 40.0074 4.59764  -1
 -19   9   6 40.0074 4.59764   2
  21   9   0 12.7980 3.58297  -1
 -21   9   7 12.7980 3.58297   2
  23   9   0 12.2266 5.91656  -1
 -23   9   8 12.2266 5.91656   2
  25   9   0 26.0086 8.28363  -1
 -25   9   8 26.0086 8.28363   2
  27   9   0 26.1075 6.57554  -1
 -27   9   9 26.1075 6.57554   2
   0  10   0 607.066 9.21810  -1
   0  10   0 607.066 9.21810   2
   2  10   0 502.725 6.20023  -1
  -2  10   1 502.725 6.20023   2
   4  10   0 474.150 5.78460  -1
  -4  10   1 474.150 5.78460   2
   6  10   0 188.238 3.51049  -1
  -6  10   2 188.238 3.51049   2
   8  10   0 159.678 4.11959  -1
  -8  10   3 159.678 4.11959   2
  10  10   0 195.067 4.45859  -1
 -10  10   3 195.067 4.45859   2
  12  10   0 84.3589 2.89955  -1
 -12  10   4 84.3589 2.89955   2
  14  10   0 95.7532 3.62148  -1
 -14  10   5 95.7532 3.62148   2
  16  10   0 43.6835 3.13595  -1
 -16  10   5 43.6835 3.13595   2
  18  10   0 14.0398 2.86888  -1
 -18  10   6 14.0398 2.86888   2
  20  10   0 25.9348 6.00814  -1
 -20  10   7 25.9348 6.00814   2
  22  10   0 21.4940 7.79433  -1
 -22  10   7 21.4940 7.79433   2
  24  10   0 19.2471 5.31575  -1
 -24  10   8 19.2471 5.31575   2
   1  11   0 348.023 5.19549  -1
   1  11   0 348.023 5.19549   2
   3  11   0 196.884 3.57473  -1
  -3  11   1 196.884 3.57473   2
   5  11   0 80.4853 3.30289  -1
  -5  11   2 80.4853 3.30289   2
   7  11   0 67.8634 3.50238  -1
  -7  11   2 67.8634 3.50238   2
   9  11   0 123.689 3.49210  -1
  -9  11   3 123.689 3.49210   2
  11  11   0 65.9053 3.82087  -1
 -11  11   4 65.9053 3.82087   2
  13  11   0 72.3572 3.84875  -1
 -13  11   4 72.3572 3.84875   2
  15  11   0 133.578 3.70607  -1
 -15  11   5 133.578 3.70607   2
  17  11   0 76.3535 4.78100  -1
 -17  11   6 76.3535 4.78100   2
  19  11   0 43.8668 9.00852  -1
 -19  11   6 43.8668 9.00852   2
  21  11   0 57.6789 4.51278  -1
 -21  11   7 57.6789 4.51278   2
  23  11   0 25.4234 7.82703  -1
 -23  11   8 25.4234 7.82703   2
  27  11   0 9.67184 10.8228  -1
 -27  11   9 9.67184 10.8228   2
   0  12   0 23.6808 3.04357  -1
   0  12   0 23.6808 3.04357   2
   2  12   0 0.07812 2.82824  -1
  -2  12   1 0.07812 2.82824   2
   4  12   0 3.72828 2.78868  -1
  -4  12   1 3.72828 2.78868   2
   6  12   0 14.6287 2.22640  -1
  -6  12   2 14.6287 2.22640   2
   8  12   0 13.5492 3.63945  -1
  -8  12   3 13.5492 3.63945   2
  10  12   0 43.8217 3.63894  -1
 -10  12   3 43.8217 3.63894   2
  12  12   0 95.6931 3.62977  -1
 -12  12   4 95.6931 3.62977   2
  14  12   0 98.4759 4.99881  -1
 -14  12   5 98.4759 4.99881   2
  16  12   0 161.196 7.34791  -1
 -16  12   5 161.196 7.34791   2
  18  12   0 63.4697 4.46665  -1
 -18  12   6 63.4697 4.46665   2
  20  12   0 19.6248 7.39116  -1
 -20  12   7 19.6248 7.39116   2
  22  12   0 47.1216 13.5010  -1
 -22  12   7 47.1216 13.5010   2
   1  13   0 186.974 4.54874  -1
   1  13   0 186.974 4.54874   2
   3  13   0 89.5866 2.97086  -1
  -3  13   1 89.5866 2.97086   2
   5  13   0 56.5526 3.90648  -1
  -5  13   2 56.5526 3.90648   2
   7  13   0 89.5480 4.50206  -1
  -7  13   2 89.5480 4.50206   2
   9  13   0 41.2659 3.25365  -1
  -9  13   3 41.2659 3.25365   2
  11  13   0 18.0719 4.88600  -1
 -11  13   4 18.0719 4.88600   2
  13  13   0 30.9737 5.21883  -1
 -13  13   4 30.9737 5.21883   2
  15  13   0 56.5692 4.02134  -1
 -15  13   5 56.5692 4.02134   2
  17  13   0 3.49359 9.14182  -1
 -17  13   6 3.49359 9.14182   2
  19  13   0 27.6483 12.8992  -1
 -19  13   6 27.6483 12.8992   2
  21  13   0 26.0572 9.33259  -1
 -21  13   7 26.0572 9.33259   2
   0  14   0 447.581 10.3392  -1
   0  14   0 447.581 10.3392   2
   2  14   0 209.029 6.63364  -1
  -2  14   1 209.029 6.63364   2
   4  14   0 115.644 5.70945  -1
  -4  14   1 115.644 5.70945   2
   6  14   0 93.2661 4.15091  -1
  -6  14   2 93.2661 4.15091   2
   8  14   0 20.8167 5.41672  -1
  -8  14   3 20.8167 5.41672   2
  10  14   0 5.66663 5.48309  -1
 -10  14   3 5.66663 5.48309   2
  12  14   0 2.30775 3.35879  -1
 -12  14   4 2.30775 3.35879   2
  14  14   0 6.59068 9.81694  -1
 -14  14   5 6.59068 9.81694   2
  16  14   0 16.5499 13.9868  -1
 -16  14   5 16.5499 13.9868   2
  18  14   0 2.03263 8.54705  -1
 -18  14   6 2.03263 8.54705   2
   1  15   0 172.051 6.69119  -1
   1  15   0 172.051 6.69119   2
   3  15   0 113.758 4.65726  -1
  -3  15   1 113.758 4.65726   2
   5  15   0 95.5711 7.17078  -1
  -5  15   2 95.5711 7.17078   2
   7  15   0 55.1409 7.74693  -1
  -7  15   2 55.1409 7.74693   2
   9  15   0 6.46259 4.55433  -1
  -9  15   3 6.46259 4.55433   2
  11  15   0 -5.7110 9.69590  -1
 -11  15   4 -5.7110 9.69590   2
  15  15   0 18.3976 8.72776  -1
 -15  15   5 18.3976 8.72776   2
   0  16   0 69.4315 11.1141  -1
   0  16   0 69.4315 11.1141   2
   2  16   0 28.6708 10.7474  -1
  -2  16   1 28.6708 10.7474   2
   4  16   0 27.3540 10.3293  -1
  -4  16   1 27.3540 10.3293   2
   6  16   0 31.0023 7.28452  -1
  -6  16   2 31.0023 7.28452   2
 -28   0   1 81.1320 7.20210  -1
 -28   0   8 81.1320 7.20210   2
 -26   0   1 81.6790 5.85201  -1
 -26   0   8 81.6790 5.85201   2
 -24   0   1 0.17372 2.06591  -1
 -24   0   7 0.17372 2.06591   2
 -22   0   1 6.64172 3.37327  -1
 -22   0   6 6.64172 3.37327   2
 -20   0   1 68.0062 3.62723  -1
 -20   0   6 68.0062 3.62723   2
 -18   0   1 0.20812 1.52465  -1
 -18   0   5 0.20812 1.52465   2
 -16   0   1 80.4224 4.91502  -1
 -16   0   4 80.4224 4.91502   2
 -14   0   1 254.610 7.35312  -1
 -14   0   4 254.610 7.35312   2
 -12   0   1 -1.6903 0.94859  -1
 -12   0   3 -1.6903 0.94859   2
 -10   0   1 835.409 22.5787  -1
 -10   0   2 835.409 22.5787   2
  -8   0   1 3539.96 127.854  -1
  -8   0   2 3539.96 127.854   2
  -6   0   1 1.20716 0.77911  -1
  -6   0   1 1.20716 0.77911   2
  -4   0   1 212.187 8.44963  -1
   4   0   0 212.187 8.44963   2
  -2   0   1 0.42397 0.34087   2
   6   0   1 -0.3513 0.59897  -1
  -6   0   3 -0.3513 0.59897   2
   8   0   1 129.304 5.26999  -1
  -8   0   4 129.304 5.26999   2
  10   0   1 163.448 5.02774  -1
 -10   0   4 163.448 5.02774   2
  12   0   1 -1.0635 0.90721  -1
 -12   0   5 -1.0635 0.90721   2
  14   0   1 141.757 4.71816  -1
 -14   0   6 141.757 4.71816   2
  16   0   1 -0.5817 3.03970  -1
 -16   0   6 -0.5817 3.03970   2
  18   0   1 -0.4467 1.44439  -1
 -18   0   7 -0.4467 1.44439   2
  20   0   1 8.29988 2.98351  -1
 -20   0   8 8.29988 2.98351   2
  22   0   1 92.4947 4.48295  -1
 -22   0   8 92.4947 4.48295   2
  24   0   1 5.05669 2.46794  -1
 -24   0   9 5.05669 2.46794   2
  26   0   1 34.6404 5.15205  -1
 -26   0  10 34.6404 5.15205   2
  28   0   1 96.3515 11.7060  -1
 -28   0  10 96.3515 11.7060   2
 -33   1   1 26.1117 7.27387  -1
 -33   1  10 26.1117 7.27387   2
 -31   1   1 24.2829 8.51392  -1
 -31   1   9 24.2829 8.51392   2
 -29   1   1 17.5215 5.33786  -1
 -29   1   9 17.5215 5.33786   2
 -27   1   1 88.9232 4.00050  -1
 -27   1   8 88.9232 4.00050   2
 -25   1   1 150.769 5.20383  -1
 -25   1   7 150.769 5.20383   2
 -23   1   1 155.538 4.21706  -1
 -23   1   7 155.538 4.21706   2
 -21   1   1 194.797 3.31896  -1
 -21   1   6 194.797 3.31896   2
 -19   1   1 147.408 4.24206  -1
 -19   1   5 147.408 4.24206   2
 -17   1   1 178.234 3.58962  -1
 -17   1   5 178.234 3.58962   2
 -15   1   1 558.274 5.22228  -1
 -15   1   4 558.274 5.22228   2
 -13   1   1 546.029 9.36107  -1
 -13   1   3 546.029 9.36107   2
 -11   1   1 84.3650 3.95788  -1
 -11   1   3 84.3650 3.95788   2
  -9   1   1 534.407 4.99646  -1
  -9   1   2 534.407 4.99646   2
  -7   1   1 206.544 10.3167  -1
  -7   1   1 206.544 10.3167   2
  -5   1   1 327.747 14.2622  -1
  -5   1   1 327.747 14.2622   2
  -3   1   1 508.838 5.59448  -1
   3   1   0 508.838 5.59448   2
  -1   1   1 2279.82 36.7787   2
   1   1   1 588.068 12.5747   2
   3   1   1 13.1694 0.53739  -1
  -3   1   2 13.1694 0.53739   2
   5   1   1 549.600 22.8504  -1
  -5   1   3 549.600 22.8504   2
   7   1   1 132.050 7.74419  -1
  -7   1   3 132.050 7.74419   2
   9   1   1 1345.10 12.0881  -1
  -9   1   4 1345.10 12.0881   2
  11   1   1 652.528 11.8163  -1
 -11   1   5 652.528 11.8163   2
  13   1   1 632.891 9.71841  -1
 -13   1   5 632.891 9.71841   2
  15   1   1 452.987 4.54962  -1
 -15   1   6 452.987 4.54962   2
  17   1   1 380.974 5.17194  -1
 -17   1   7 380.974 5.17194   2
  19   1   1 351.892 6.18400  -1
 -19   1   7 351.892 6.18400   2
  21   1   1 74.5716 2.25263  -1
 -21   1   8 74.5716 2.25263   2
  23   1   1 34.5708 3.68637  -1
 -23   1   9 34.5708 3.68637   2
  25   1   1 0.38904 3.65446  -1
 -25   1   9 0.38904 3.65446   2
  27   1   1 11.7817 2.97539  -1
 -27   1  10 11.7817 2.97539   2
  29   1   1 13.9979 6.43646  -1
 -29   1  11 13.9979 6.43646   2
  31   1   1 6.74286 12.0930  -1
 -31   1  11 6.74286 12.0930   2
  33   1   1 2.78543 8.56524  -1
 -33   1  12 2.78543 8.56524   2
 -36   2   1 10.4325 11.9490  -1
 -36   2  11 10.4325 11.9490   2
 -34   2   1 2.11428 12.8203  -1
 -34   2  10 2.11428 12.8203   2
 -32   2   1 0.85160 7.83230  -1
 -32   2  10 0.85160 7.83230   2
 -30   2   1 18.1445 3.06753  -1
 -30   2   9 18.1445 3.06753   2
 -28   2   1 60.5832 4.15742  -1
 -28   2   8 60.5832 4.15742   2
 -26   2   1 90.1123 4.32552  -1
 -26   2   8 90.1123 4.32552   2
 -24   2   1 279.919 5.82019  -1
 -24   2   7 279.919 5.82019   2
 -22   2   1 166.164 4.87666  -1
 -22   2   6 166.164 4.87666   2
 -20   2   1 360.366 6.22183  -1
 -20   2   6 360.366 6.22183   2
 -18   2   1 733.773 7.54112  -1
 -18   2   5 733.773 7.54112   2
 -16   2   1 359.391 6.75469  -1
 -16   2   4 359.391 6.75469   2
 -14   2   1 820.419 11.9356  -1
 -14   2   4 820.419 11.9356   2
 -12   2   1 293.977 3.16035  -1
 -12   2   3 293.977 3.16035   2
 -10   2   1 28.1151 2.10507  -1
 -10   2   2 28.1151 2.10507   2
  -8   2   1 345.712 10.9569  -1
  -8   2   2 345.712 10.9569   2
  -6   2   1 48.8363 1.10562  -1
  -6   2   1 48.8363 1.10562   2
  -4   2   1 66.3459 5.27359  -1
   4   2   0 66.3459 5.27359   2
  -2   2   1 45.9480 3.94059  -1
   2   2   0 45.9480 3.94059   2
   0   2   1 35.3870 0.86317  -1
   0   2   1 35.3870 0.86317   2
   2   2   1 440.669 18.4307  -1
  -2   2   2 440.669 18.4307   2
   4   2   1 2455.40 96.8473  -1
  -4   2   2 2455.40 96.8473   2
   6   2   1 1177.84 16.3847  -1
  -6   2   3 1177.84 16.3847   2
   8   2   1 157.685 6.25035  -1
  -8   2   4 157.685 6.25035   2
  10   2   1 305.613 7.98183  -1
 -10   2   4 305.613 7.98183   2
  12   2   1 1498.96 13.9123  -1
 -12   2   5 1498.96 13.9123   2
  14   2   1 746.548 10.8998  -1
 -14   2   6 746.548 10.8998   2
  16   2   1 518.482 8.30621  -1
 -16   2   6 518.482 8.30621   2
  18   2   1 483.659 5.60082  -1
 -18   2   7 483.659 5.60082   2
  20   2   1 63.2496 2.91818  -1
 -20   2   8 63.2496 2.91818   2
  22   2   1 85.0928 4.65631  -1
 -22   2   8 85.0928 4.65631   2
  24   2   1 -3.3546 2.21076  -1
 -24   2   9 -3.3546 2.21076   2
  26   2   1 7.94156 4.28037  -1
 -26   2  10 7.94156 4.28037   2
  28   2   1 6.60001 7.24112  -1
 -28   2  10 6.60001 7.24112   2
  30   2   1 32.2502 4.59212  -1
 -30   2  11 32.2502 4.59212   2
  32   2   1 -11.394 8.88795  -1
 -32   2  12 -11.394 8.88795   2
  34   2   1 21.3327 14.0243  -1
 -34   2  12 21.3327 14.0243   2
 -35   3   1 -3.9494 15.0578  -1
 -35   3  11 -3.9494 15.0578   2
 -33   3   1 5.99503 4.81772  -1
 -33   3  10 5.99503 4.81772   2
 -31   3   1 27.9212 6.35379  -1
 -31   3   9 27.9212 6.35379   2
 -29   3   1 23.6512 4.89593  -1
 -29   3   9 23.6512 4.89593   2
 -27   3   1 3.55545 2.69744  -1
 -27   3   8 3.55545 2.69744   2
 -25   3   1 177.427 5.20919  -1
 -25   3   7 177.427 5.20919   2
 -23   3   1 243.764 5.81218  -1
 -23   3   7 243.764 5.81218   2
 -21   3   1 202.995 3.91121  -1
 -21   3   6 202.995 3.91121   2
 -19   3   1 445.228 8.70424  -1
 -19   3   5 445.228 8.70424   2
 -17   3   1 855.752 15.6078  -1
 -17   3   5 855.752 15.6078   2
 -15   3   1 353.712 4.17404  -1
 -15   3   4 353.712 4.17404   2
 -13   3   1 399.678 9.27267  -1
 -13   3   3 399.678 9.27267   2
 -11   3   1 855.830 19.8904  -1
 -11   3   3 855.830 19.8904   2
  -9   3   1 543.038 5.95170  -1
  -9   3   2 543.038 5.95170   2
  -7   3   1 420.585 12.9877  -1
  -7   3   1 420.585 12.9877   2
  -5   3   1 1295.18 52.4138  -1
  -5   3   1 1295.18 52.4138   2
  -3   3   1 3457.51 40.3879  -1
   3   3   0 3457.51 40.3879   2
  -1   3   1 871.446 35.6004  -1
   1   3   1 871.446 35.6004   2
   1   3   1 950.577 38.6131  -1
  -1   3   1 950.577 38.6131   2
   3   3   1 171.307 1.96438  -1
  -3   3   2 171.307 1.96438   2
   5   3   1 441.472 19.4267  -1
  -5   3   3 441.472 19.4267   2
   7   3   1 751.219 16.9389  -1
  -7   3   3 751.219 16.9389   2
   9   3   1 707.084 8.27533  -1
  -9   3   4 707.084 8.27533   2
  11   3   1 920.193 21.1786  -1
 -11   3   5 920.193 21.1786   2
  13   3   1 1156.66 23.2200  -1
 -13   3   5 1156.66 23.2200   2
  15   3   1 425.458 5.73791  -1
 -15   3   6 425.458 5.73791   2
  17   3   1 225.176 5.86093  -1
 -17   3   7 225.176 5.86093   2
  19   3   1 284.076 5.48924  -1
 -19   3   7 284.076 5.48924   2
  21   3   1 8.91774 1.89136  -1
 -21   3   8 8.91774 1.89136   2
  23   3   1 -1.5228 2.87931  -1
 -23   3   9 -1.5228 2.87931   2
  25   3   1 84.1771 5.01298  -1
 -25   3   9 84.1771 5.01298   2
  27   3   1 24.9227 3.13267  -1
 -27   3  10 24.9227 3.13267   2
  29   3   1 9.57549 5.94684  -1
 -29   3  11 9.57549 5.94684   2
  31   3   1 6.23921 6.50120  -1
 -31   3  11 6.23921 6.50120   2
  33   3   1 11.5402 5.08917  -1
 -33   3  12 11.5402 5.08917   2
  35   3   1 -13.411 15.3316  -1
 -35   3  13 -13.411 15.3316   2
 -34   4   1 10.0686 14.0360  -1
 -34   4  10 10.0686 14.0360   2
 -32   4   1 17.7135 9.46458  -1
 -32   4  10 17.7135 9.46458   2
 -30   4   1 61.5555 6.49489  -1
 -30   4   9 61.5555 6.49489   2
 -28   4   1 7.74508 4.76050  -1
 -28   4   8 7.74508 4.76050   2
 -26   4   1 -3.2973 3.92740  -1
 -26   4   8 -3.2973 3.92740   2
 -24   4   1 58.7049 3.51556  -1
 -24   4   7 58.7049 3.51556   2
 -22   4   1 119.803 5.29021  -1
 -22   4   6 119.803 5.29021   2
 -20   4   1 207.750 5.38095  -1
 -20   4   6 207.750 5.38095   2
 -18   4   1 163.253 3.27442  -1
 -18   4   5 163.253 3.27442   2
 -16   4   1 93.4346 3.73642  -1
 -16   4   4 93.4346 3.73642   2
 -14   4   1 133.734 4.53411  -1
 -14   4   4 133.734 4.53411   2
 -12   4   1 242.481 3.15459  -1
 -12   4   3 242.481 3.15459   2
 -10   4   1 23.5627 3.16598  -1
 -10   4   2 23.5627 3.16598   2
  -8   4   1 666.053 27.1254  -1
  -8   4   2 666.053 27.1254   2
  -6   4   1 601.244 6.81327  -1
  -6   4   1 601.244 6.81327   2
  -4   4   1 1362.68 37.6650  -1
   4   4   0 1362.68 37.6650   2
  -2   4   1 1653.69 45.2548  -1
   2   4   0 1653.69 45.2548   2
   0   4   1 852.241 10.3108  -1
   0   4   1 852.241 10.3108   2
   2   4   1 734.224 21.0283  -1
  -2   4   2 734.224 21.0283   2
   4   4   1 60.3354 4.28786  -1
  -4   4   2 60.3354 4.28786   2
   6   4   1 504.830 5.80430  -1
  -6   4   3 504.830 5.80430   2
   8   4   1 19.6401 5.47374  -1
  -8   4   4 19.6401 5.47374   2
  10   4   1 266.824 7.55780  -1
 -10   4   4 266.824 7.55780   2
  12   4   1 279.796 3.61592  -1
 -12   4   5 279.796 3.61592   2
  14   4   1 364.069 6.96560  -1
 -14   4   6 364.069 6.96560   2
  16   4   1 148.104 4.53447  -1
 -16   4   6 148.104 4.53447   2
  18   4   1 12.2212 1.70302  -1
 -18   4   7 12.2212 1.70302   2
  20   4   1 13.4682 3.58325  -1
 -20   4   8 13.4682 3.58325   2
  22   4   1 82.4839 4.71366  -1
 -22   4   8 82.4839 4.71366   2
  24   4   1 70.3041 3.21526  -1
 -24   4   9 70.3041 3.21526   2
  26   4   1 116.099 6.07522  -1
 -26   4  10 116.099 6.07522   2
  28   4   1 21.7694 5.83045  -1
 -28   4  10 21.7694 5.83045   2
  30   4   1 41.7000 6.31351  -1
 -30   4  11 41.7000 6.31351   2
  32   4   1 49.9500 9.85155  -1
 -32   4  12 49.9500 9.85155   2
  34   4   1 14.1223 15.4204  -1
 -34   4  12 14.1223 15.4204   2
 -33   5   1 41.7225 12.2549  -1
 -33   5  10 41.7225 12.2549   2
 -31   5   1 47.7990 9.85740  -1
 -31   5   9 47.7990 9.85740   2
 -29   5   1 22.3240 8.57508  -1
 -29   5   9 22.3240 8.57508   2
 -27   5   1 23.1736 4.01587  -1
 -27   5   8 23.1736 4.01587   2
 -25   5   1 2.31478 4.75921  -1
 -25   5   7 2.31478 4.75921   2
 -23   5   1 7.48192 4.63010  -1
 -23   5   7 7.48192 4.63010   2
 -21   5   1 13.6871 2.77561  -1
 -21   5   6 13.6871 2.77561   2
 -19   5   1 84.2617 3.92325  -1
 -19   5   5 84.2617 3.92325   2
 -17   5   1 17.2699 2.82508  -1
 -17   5   5 17.2699 2.82508   2
 -15   5   1 20.4950 1.35628  -1
 -15   5   4 20.4950 1.35628   2
 -13   5   1 137.377 3.80706  -1
 -13   5   3 137.377 3.80706   2
 -11   5   1 241.724 6.29305  -1
 -11   5   3 241.724 6.29305   2
  -9   5   1 686.296 6.61733  -1
  -9   5   2 686.296 6.61733   2
  -7   5   1 896.679 19.7541  -1
  -7   5   1 896.679 19.7541   2
  -5   5   1 610.932 14.3460  -1
  -5   5   1 610.932 14.3460   2
  -3   5   1 1194.89 11.8598  -1
   3   5   0 1194.89 11.8598   2
  -1   5   1 921.175 21.7904  -1
   1   5   1 921.175 21.7904   2
   1   5   1 916.650 21.7984  -1
  -1   5   1 916.650 21.7984   2
   3   5   1 1775.97 15.6141  -1
  -3   5   2 1775.97 15.6141   2
   5   5   1 184.236 6.72376  -1
  -5   5   3 184.236 6.72376   2
   7   5   1 257.029 6.15191  -1
  -7   5   3 257.029 6.15191   2
   9   5   1 36.8516 1.19506  -1
  -9   5   4 36.8516 1.19506   2
  11   5   1 135.696 5.43574  -1
 -11   5   5 135.696 5.43574   2
  13   5   1 78.4362 3.15939  -1
 -13   5   5 78.4362 3.15939   2
  15   5   1 12.5640 1.35818  -1
 -15   5   6 12.5640 1.35818   2
  17   5   1 100.469 3.44818  -1
 -17   5   7 100.469 3.44818   2
  19   5   1 -0.5469 3.21108  -1
 -19   5   7 -0.5469 3.21108   2
  21   5   1 17.2238 2.86889  -1
 -21   5   8 17.2238 2.86889   2
  23   5   1 60.9193 5.27969  -1
 -23   5   9 60.9193 5.27969   2
  25   5   1 106.765 6.11023  -1
 -25   5   9 106.765 6.11023   2
  27   5   1 53.1094 4.41084  -1
 -27   5  10 53.1094 4.41084   2
  29   5   1 42.6826 8.81395  -1
 -29   5  11 42.6826 8.81395   2
  31   5   1 61.5369 10.2299  -1
 -31   5  11 61.5369 10.2299   2
  33   5   1 17.8238 11.0503  -1
 -33   5  12 17.8238 11.0503   2
 -32   6   1 32.8342 15.3744  -1
 -32   6  10 32.8342 15.3744   2
 -30   6   1 37.1172 6.43771  -1
 -30   6   9 37.1172 6.43771   2
 -28   6   1 48.0164 9.28474  -1
 -28   6   8 48.0164 9.28474   2
 -26   6   1 45.5705 5.58917  -1
 -26   6   8 45.5705 5.58917   2
 -24   6   1 8.40282 3.19976  -1
 -24   6   7 8.40282 3.19976   2
 -22   6   1 166.445 6.38753  -1
 -22   6   6 166.445 6.38753   2
 -20   6   1 176.456 6.08773  -1
 -20   6   6 176.456 6.08773   2
 -18   6   1 -2.3470 2.21596  -1
 -18   6   5 -2.3470 2.21596   2
 -16   6   1 253.772 4.77249  -1
 -16   6   4 253.772 4.77249   2
 -14   6   1 529.866 7.88983  -1
 -14   6   4 529.866 7.88983   2
 -12   6   1 200.940 2.85446  -1
 -12   6   3 200.940 2.85446   2
 -10   6   1 253.243 5.94458  -1
 -10   6   2 253.243 5.94458   2
  -8   6   1 340.842 7.65162  -1
  -8   6   2 340.842 7.65162   2
  -6   6   1 262.545 2.72346  -1
  -6   6   1 262.545 2.72346   2
  -4   6   1 159.474 4.03907  -1
   4   6   0 159.474 4.03907   2
  -2   6   1 414.119 6.46346  -1
   2   6   0 414.119 6.46346   2
   0   6   1 1147.72 9.94286  -1
   0   6   1 1147.72 9.94286   2
   2   6   1 718.356 11.8540  -1
  -2   6   2 718.356 11.8540   2
   4   6   1 706.550 11.4435  -1
  -4   6   2 706.550 11.4435   2
   6   6   1 179.951 2.06617  -1
  -6   6   3 179.951 2.06617   2
   8   6   1 182.344 4.76078  -1
  -8   6   4 182.344 4.76078   2
  10   6   1 406.375 7.01328  -1
 -10   6   4 406.375 7.01328   2
  12   6   1 68.5824 1.81720  -1
 -12   6   5 68.5824 1.81720   2
  14   6   1 148.203 3.66098  -1
 -14   6   6 148.203 3.66098   2
  16   6   1 233.931 4.35222  -1
 -16   6   6 233.931 4.35222   2
  18   6   1 47.6785 2.58960  -1
 -18   6   7 47.6785 2.58960   2
  20   6   1 47.4573 4.39623  -1
 -20   6   8 47.4573 4.39623   2
  22   6   1 94.4205 5.35028  -1
 -22   6   8 94.4205 5.35028   2
  24   6   1 35.4364 3.60070  -1
 -24   6   9 35.4364 3.60070   2
  26   6   1 28.3727 5.28111  -1
 -26   6  10 28.3727 5.28111   2
  28   6   1 20.3838 7.63878  -1
 -28   6  10 20.3838 7.63878   2
  30   6   1 51.0405 6.96110  -1
 -30   6  11 51.0405 6.96110   2
  32   6   1 11.6310 14.2688  -1
 -32   6  12 11.6310 14.2688   2
 -33   7   1 -0.2583 11.1954  -1
 -33   7  10 -0.2583 11.1954   2
 -31   7   1 -1.8768 14.7590  -1
 -31   7   9 -1.8768 14.7590   2
 -29   7   1 17.0008 11.3335  -1
 -29   7   9 17.0008 11.3335   2
 -27   7   1 65.7946 5.62759  -1
 -27   7   8 65.7946 5.62759   2
 -25   7   1 17.1536 6.23103  -1
 -25   7   7 17.1536 6.23103   2
 -23   7   1 4.21544 5.53750  -1
 -23   7   7 4.21544 5.53750   2
 -21   7   1 322.766 7.43760  -1
 -21   7   6 322.766 7.43760   2
 -19   7   1 24.9442 3.70379  -1
 -19   7   5 24.9442 3.70379   2
 -17   7   1 42.5941 3.42704  -1
 -17   7   5 42.5941 3.42704   2
 -15   7   1 386.364 5.68188  -1
 -15   7   4 386.364 5.68188   2
 -13   7   1 34.5219 2.80812  -1
 -13   7   3 34.5219 2.80812   2
 -11   7   1 74.1632 3.03227  -1
 -11   7   3 74.1632 3.03227   2
  -9   7   1 145.773 2.26638  -1
  -9   7   2 145.773 2.26638   2
  -7   7   1 46.1078 2.67379  -1
  -7   7   1 46.1078 2.67379   2
  -5   7   1 61.5309 2.39440  -1
  -5   7   1 61.5309 2.39440   2
  -3   7   1 51.9383 1.20320  -1
   3   7   0 51.9383 1.20320   2
  -1   7   1 63.5042 2.42368  -1
   1   7   1 63.5042 2.42368   2
   1   7   1 63.4678 2.37807  -1
  -1   7   1 63.4678 2.37807   2
   3   7   1 163.417 2.11659  -1
  -3   7   2 163.417 2.11659   2
   5   7   1 49.5752 2.90188  -1
  -5   7   3 49.5752 2.90188   2
   7   7   1 30.0776 2.43544  -1
  -7   7   3 30.0776 2.43544   2
   9   7   1 215.770 2.79433  -1
  -9   7   4 215.770 2.79433   2
  11   7   1 35.4284 3.13679  -1
 -11   7   5 35.4284 3.13679   2
  13   7   1 24.3967 2.61229  -1
 -13   7   5 24.3967 2.61229   2
  15   7   1 288.814 4.94994  -1
 -15   7   6 288.814 4.94994   2
  17   7   1 5.16116 3.30810  -1
 -17   7   7 5.16116 3.30810   2
  19   7   1 21.3150 3.90201  -1
 -19   7   7 21.3150 3.90201   2
  21   7   1 40.0350 3.54466  -1
 -21   7   8 40.0350 3.54466   2
  23   7   1 1.48889 4.83157  -1
 -23   7   9 1.48889 4.83157   2
  25   7   1 1.03316 4.88137  -1
 -25   7   9 1.03316 4.88137   2
  27   7   1 5.35884 4.84977  -1
 -27   7  10 5.35884 4.84977   2
  29   7   1 -2.0231 8.47594  -1
 -29   7  11 -2.0231 8.47594   2
  31   7   1 6.40034 15.0686  -1
 -31   7  11 6.40034 15.0686   2
 -30   8   1 16.6824 11.6276  -1
 -30   8   9 16.6824 11.6276   2
 -28   8   1 1.08734 8.82139  -1
 -28   8   8 1.08734 8.82139   2
 -26   8   1 24.6787 7.44922  -1
 -26   8   8 24.6787 7.44922   2
 -24   8   1 7.80017 3.53076  -1
 -24   8   7 7.80017 3.53076   2
 -22   8   1 101.202 6.26311  -1
 -22   8   6 101.202 6.26311   2
 -20   8   1 161.451 6.55145  -1
 -20   8   6 161.451 6.55145   2
 -18   8   1 10.1158 2.43107  -1
 -18   8   5 10.1158 2.43107   2
 -16   8   1 127.341 4.22178  -1
 -16   8   4 127.341 4.22178   2
 -14   8   1 285.564 5.62307  -1
 -14   8   4 285.564 5.62307   2
 -12   8   1 105.746 2.25399  -1
 -12   8   3 105.746 2.25399   2
 -10   8   1 79.4784 2.90951  -1
 -10   8   2 79.4784 2.90951   2
  -8   8   1 26.7537 2.45068  -1
  -8   8   2 26.7537 2.45068   2
  -6   8   1 65.8040 1.68108  -1
  -6   8   1 65.8040 1.68108   2
  -4   8   1 79.7009 2.19837  -1
   4   8   0 79.7009 2.19837   2
  -2   8   1 50.0588 2.02121  -1
   2   8   0 50.0588 2.02121   2
   0   8   1 514.298 5.19622  -1
   0   8   1 514.298 5.19622   2
   2   8   1 191.286 3.31033  -1
  -2   8   2 191.286 3.31033   2
   4   8   1 133.073 2.65986  -1
  -4   8   2 133.073 2.65986   2
   6   8   1 106.242 2.11623  -1
  -6   8   3 106.242 2.11623   2
   8   8   1 270.365 4.38684  -1
  -8   8   4 270.365 4.38684   2
  10   8   1 92.0067 3.01614  -1
 -10   8   4 92.0067 3.01614   2
  12   8   1 46.9335 1.84194  -1
 -12   8   5 46.9335 1.84194   2
  14   8   1 79.6110 3.33511  -1
 -14   8   6 79.6110 3.33511   2
  16   8   1 131.651 4.23553  -1
 -16   8   6 131.651 4.23553   2
  18   8   1 1.48810 2.31445  -1
 -18   8   7 1.48810 2.31445   2
  20   8   1 22.2950 4.27806  -1
 -20   8   8 22.2950 4.27806   2
  22   8   1 34.4090 5.36855  -1
 -22   8   8 34.4090 5.36855   2
  24   8   1 23.5204 3.78841  -1
 -24   8   9 23.5204 3.78841   2
  26   8   1 25.8795 7.62387  -1
 -26   8  10 25.8795 7.62387   2
  28   8   1 14.4177 8.91197  -1
 -28   8  10 14.4177 8.91197   2
  30   8   1 18.8745 12.0792  -1
 -30   8  11 18.8745 12.0792   2
 -27   9   1 28.1117 5.54159  -1
 -27   9   8 28.1117 5.54159   2
 -25   9   1 5.87811 8.65528  -1
 -25   9   7 5.87811 8.65528   2
 -23   9   1 3.27430 5.79668  -1
 -23   9   7 3.27430 5.79668   2
 -21   9   1 32.5110 3.94916  -1
 -21   9   6 32.5110 3.94916   2
 -19   9   1 2.40048 4.39668  -1
 -19   9   5 2.40048 4.39668   2
 -17   9   1 15.3548 4.10607  -1
 -17   9   5 15.3548 4.10607   2
 -15   9   1 71.0854 2.53365  -1
 -15   9   4 71.0854 2.53365   2
 -13   9   1 199.851 4.13998  -1
 -13   9   3 199.851 4.13998   2
 -11   9   1 186.056 4.10273  -1
 -11   9   3 186.056 4.10273   2
  -9   9   1 220.848 3.69497  -1
  -9   9   2 220.848 3.69497   2
  -7   9   1 924.470 11.2525  -1
  -7   9   1 924.470 11.2525   2
  -5   9   1 843.796 10.2817  -1
  -5   9   1 843.796 10.2817   2
  -3   9   1 347.182 4.24050  -1
   3   9   0 347.182 4.24050   2
  -1   9   1 1340.37 13.4071  -1
   1   9   1 1340.37 13.4071   2
   1   9   1 1313.49 13.6449  -1
  -1   9   1 1313.49 13.6449   2
   3   9   1 239.234 3.21045  -1
  -3   9   2 239.234 3.21045   2
   5   9   1 281.483 4.56006  -1
  -5   9   3 281.483 4.56006   2
   7   9   1 241.792 4.19773  -1
  -7   9   3 241.792 4.19773   2
   9   9   1 23.5071 1.80354  -1
  -9   9   4 23.5071 1.80354   2
  11   9   1 4.64878 2.67480  -1
 -11   9   5 4.64878 2.67480   2
  13   9   1 8.18127 2.63600  -1
 -13   9   5 8.18127 2.63600   2
  15   9   1 23.3544 2.03143  -1
 -15   9   6 23.3544 2.03143   2
  17   9   1 21.1813 4.08538  -1
 -17   9   7 21.1813 4.08538   2
  19   9   1 6.00990 4.56420  -1
 -19   9   7 6.00990 4.56420   2
  21   9   1 40.3619 3.66393  -1
 -21   9   8 40.3619 3.66393   2
  23   9   1 32.1163 6.25280  -1
 -23   9   9 32.1163 6.25280   2
  25   9   1 57.8257 9.00131  -1
 -25   9   9 57.8257 9.00131   2
  27   9   1 43.9981 6.86450  -1
 -27   9  10 43.9981 6.86450   2
 -26  10   1 25.9861 13.8962  -1
 -26  10   8 25.9861 13.8962   2
 -24  10   1 3.87432 5.05529  -1
 -24  10   7 3.87432 5.05529   2
 -22  10   1 4.57632 7.45252  -1
 -22  10   6 4.57632 7.45252   2
 -20  10   1 8.60893 4.74187  -1
 -20  10   6 8.60893 4.74187   2
 -18  10   1 38.5298 3.14314  -1
 -18  10   5 38.5298 3.14314   2
 -16  10   1 3.82933 3.22832  -1
 -16  10   4 3.82933 3.22832   2
 -14  10   1 -0.1188 2.99263  -1
 -14  10   4 -0.1188 2.99263   2
 -12  10   1 150.703 3.43283  -1
 -12  10   3 150.703 3.43283   2
 -10  10   1 102.748 3.62598  -1
 -10  10   2 102.748 3.62598   2
  -8  10   1 139.247 3.88406  -1
  -8  10   2 139.247 3.88406   2
  -6  10   1 484.164 6.43498  -1
  -6  10   1 484.164 6.43498   2
  -4  10   1 474.304 5.81629  -1
   4  10   0 474.304 5.81629   2
  -2  10   1 502.084 6.19538  -1
   2  10   0 502.084 6.19538   2
   0  10   1 466.795 5.27777  -1
   0  10   1 466.795 5.27777   2
   2  10   1 144.238 3.23618  -1
  -2  10   2 144.238 3.23618   2
   4  10   1 95.7956 2.70077  -1
  -4  10   2 95.7956 2.70077   2
   6  10   1 99.8019 2.65022  -1
  -6  10   3 99.8019 2.65022   2
   8  10   1 18.2028 2.90832  -1
  -8  10   4 18.2028 2.90832   2
  10  10   1 17.5152 3.04974  -1
 -10  10   4 17.5152 3.04974   2
  12  10   1 13.3552 2.07697  -1
 -12  10   5 13.3552 2.07697   2
  14  10   1 42.3864 3.36060  -1
 -14  10   6 42.3864 3.36060   2
  16  10   1 2.67889 3.17316  -1
 -16  10   6 2.67889 3.17316   2
  18  10   1 -1.3200 2.67606  -1
 -18  10   7 -1.3200 2.67606   2
  20  10   1 21.3142 5.51674  -1
 -20  10   8 21.3142 5.51674   2
  22  10   1 7.87908 6.66273  -1
 -22  10   8 7.87908 6.66273   2
  24  10   1 30.1886 5.60373  -1
 -24  10   9 30.1886 5.60373   2
  28  10   1 23.6435 15.7575  -1
 -28  10  10 23.6435 15.7575   2
 -27  11   1 -4.8137 10.0863  -1
 -27  11   8 -4.8137 10.0863   2
 -23  11   1 47.0080 14.6731  -1
 -23  11   7 47.0080 14.6731   2
 -21  11   1 68.4930 4.63500  -1
 -21  11   6 68.4930 4.63500   2
 -19  11   1 109.672 7.22656  -1
 -19  11   5 109.672 7.22656   2
 -17  11   1 165.240 6.31191  -1
 -17  11   5 165.240 6.31191   2
 -15  11   1 92.2889 3.13507  -1
 -15  11   4 92.2889 3.13507   2
 -13  11   1 89.8928 3.94314  -1
 -13  11   3 89.8928 3.94314   2
 -11  11   1 88.7711 4.15277  -1
 -11  11   3 88.7711 4.15277   2
  -9  11   1 61.0328 2.87939  -1
  -9  11   2 61.0328 2.87939   2
  -7  11   1 151.288 4.20353  -1
  -7  11   1 151.288 4.20353   2
  -5  11   1 99.9864 3.29031  -1
  -5  11   1 99.9864 3.29031   2
  -3  11   1 201.873 3.59807  -1
   3  11   0 201.873 3.59807   2
  -1  11   1 79.4776 2.96435  -1
   1  11   1 79.4776 2.96435   2
   1  11   1 88.1825 3.06235  -1
  -1  11   1 88.1825 3.06235   2
   3  11   1 10.3373 1.73609  -1
  -3  11   2 10.3373 1.73609   2
   5  11   1 58.2719 3.14585  -1
  -5  11   3 58.2719 3.14585   2
   7  11   1 155.745 4.05737  -1
  -7  11   3 155.745 4.05737   2
   9  11   1 173.427 4.02551  -1
  -9  11   4 173.427 4.02551   2
  11  11   1 154.907 4.60239  -1
 -11  11   5 154.907 4.60239   2
  13  11   1 215.330 5.42875  -1
 -13  11   5 215.330 5.42875   2
  15  11   1 151.907 3.91965  -1
 -15  11   6 151.907 3.91965   2
  17  11   1 35.9471 4.36967  -1
 -17  11   7 35.9471 4.36967   2
  19  11   1 31.5153 8.42391  -1
 -19  11   7 31.5153 8.42391   2
  21  11   1 3.14143 3.63559  -1
 -21  11   8 3.14143 3.63559   2
  23  11   1 6.40403 8.86350  -1
 -23  11   9 6.40403 8.86350   2
  27  11   1 9.92077 11.4437  -1
 -27  11  10 9.92077 11.4437   2
 -20  12   1 115.875 10.9345  -1
 -20  12   6 115.875 10.9345   2
 -18  12   1 120.278 5.28617  -1
 -18  12   5 120.278 5.28617   2
 -16  12   1 138.189 6.56462  -1
 -16  12   4 138.189 6.56462   2
 -14  12   1 114.553 5.57961  -1
 -14  12   4 114.553 5.57961   2
 -12  12   1 46.7115 3.04830  -1
 -12  12   3 46.7115 3.04830   2
 -10  12   1 17.8317 3.49327  -1
 -10  12   2 17.8317 3.49327   2
  -8  12   1 18.4202 4.02119  -1
  -8  12   2 18.4202 4.02119   2
  -6  12   1 -0.4211 2.12931  -1
  -6  12   1 -0.4211 2.12931   2
  -4  12   1 2.67245 2.70441  -1
   4  12   0 2.67245 2.70441   2
  -2  12   1 5.59164 2.80215  -1
   2  12   0 5.59164 2.80215   2
   0  12   1 14.4967 2.05730  -1
   0  12   1 14.4967 2.05730   2
   2  12   1 41.2182 3.06001  -1
  -2  12   2 41.2182 3.06001   2
   4  12   1 62.9123 3.14702  -1
  -4  12   2 62.9123 3.14702   2
   6  12   1 62.5752 2.82825  -1
  -6  12   3 62.5752 2.82825   2
   8  12   1 129.971 4.74046  -1
  -8  12   4 129.971 4.74046   2
  10  12   1 157.556 4.66497  -1
 -10  12   4 157.556 4.66497   2
  12  12   1 178.006 4.56027  -1
 -12  12   5 178.006 4.56027   2
  14  12   1 140.317 5.60366  -1
 -14  12   6 140.317 5.60366   2
  16  12   1 122.892 6.72428  -1
 -16  12   6 122.892 6.72428   2
  18  12   1 108.904 5.53922  -1
 -18  12   7 108.904 5.53922   2
  20  12   1 24.9999 8.47078  -1
 -20  12   8 24.9999 8.47078   2
  22  12   1 6.60932 12.9870  -1
 -22  12   8 6.60932 12.9870   2
  24  12   1 -3.5681 8.28199  -1
 -24  12   9 -3.5681 8.28199   2
 -19  13   1 58.4536 13.4924  -1
 -19  13   5 58.4536 13.4924   2
 -17  13   1 117.003 10.8025  -1
 -17  13   5 117.003 10.8025   2
 -15  13   1 50.5157 4.03146  -1
 -15  13   4 50.5157 4.03146   2
 -13  13   1 40.4443 5.33301  -1
 -13  13   3 40.4443 5.33301   2
 -11  13   1 58.4510 5.19467  -1
 -11  13   3 58.4510 5.19467   2
  -9  13   1 46.3975 3.31117  -1
  -9  13   2 46.3975 3.31117   2
  -7  13   1 6.94189 3.97818  -1
  -7  13   1 6.94189 3.97818   2
  -5  13   1 -2.3880 3.84644  -1
  -5  13   1 -2.3880 3.84644   2
  -3  13   1 96.5551 2.98775  -1
   3  13   0 96.5551 2.98775   2
  -1  13   1 8.35917 3.67609  -1
   1  13   1 8.35917 3.67609   2
   1  13   1 9.72039 3.33156  -1
  -1  13   1 9.72039 3.33156   2
   3  13   1 40.3871 2.49949  -1
  -3  13   2 40.3871 2.49949   2
   5  13   1 15.9024 3.74947  -1
  -5  13   3 15.9024 3.74947   2
   7  13   1 42.3131 3.99035  -1
  -7  13   3 42.3131 3.99035   2
   9  13   1 49.2014 3.42902  -1
  -9  13   4 49.2014 3.42902   2
  11  13   1 125.614 6.61572  -1
 -11  13   5 125.614 6.61572   2
  13  13   1 101.132 6.44235  -1
 -13  13   5 101.132 6.44235   2
  15  13   1 55.5411 4.02557  -1
 -15  13   6 55.5411 4.02557   2
  17  13   1 53.3375 9.90825  -1
 -17  13   7 53.3375 9.90825   2
  19  13   1 39.5303 13.5280  -1
 -19  13   7 39.5303 13.5280   2
  21  13   1 11.1988 8.81488  -1
 -21  13   8 11.1988 8.81488   2
 -18  14   1 7.82642 8.31888  -1
 -18  14   5 7.82642 8.31888   2
 -16  14   1 29.8766 13.1272  -1
 -16  14   4 29.8766 13.1272   2
 -14  14   1 14.8412 9.97012  -1
 -14  14   4 14.8412 9.97012   2
 -12  14   1 2.69720 3.61592  -1
 -12  14   3 2.69720 3.61592   2
 -10  14   1 72.0299 6.13824  -1
 -10  14   2 72.0299 6.13824   2
  -8  14   1 84.9796 5.94809  -1
  -8  14   2 84.9796 5.94809   2
  -6  14   1 -2.9026 2.77812  -1
  -6  14   1 -2.9026 2.77812   2
  -4  14   1 116.736 5.72331  -1
   4  14   0 116.736 5.72331   2
  -2  14   1 219.678 6.70802  -1
   2  14   0 219.678 6.70802   2
   0  14   1 1.32581 2.48182  -1
   0  14   1 1.32581 2.48182   2
   2  14   1 51.1886 5.13762  -1
  -2  14   2 51.1886 5.13762   2
   4  14   1 54.1191 5.20501  -1
  -4  14   2 54.1191 5.20501   2
   6  14   1 1.92860 2.89687  -1
  -6  14   3 1.92860 2.89687   2
   8  14   1 5.25650 5.25999  -1
  -8  14   4 5.25650 5.25999   2
  10  14   1 -2.3842 5.37502  -1
 -10  14   4 -2.3842 5.37502   2
  12  14   1 4.96396 3.57862  -1
 -12  14   5 4.96396 3.57862   2
  14  14   1 35.3111 13.4207  -1
 -14  14   6 35.3111 13.4207   2
  16  14   1 5.07463 13.0841  -1
 -16  14   6 5.07463 13.0841   2
  18  14   1 10.9759 8.62800  -1
 -18  14   7 10.9759 8.62800   2
 -15  15   1 4.20875 8.76079  -1
 -15  15   4 4.20875 8.76079   2
 -13  15   1 10.8006 9.77680  -1
 -13  15   3 10.8006 9.77680   2
 -11  15   1 8.39441 8.14132  -1
 -11  15   3 8.39441 8.14132   2
  -9  15   1 52.5184 5.44167  -1
  -9  15   2 52.5184 5.44167   2
  -7  15   1 0.43067 6.42660  -1
  -7  15   1 0.43067 6.42660   2
  -5  15   1 4.39914 6.13181  -1
  -5  15   1 4.39914 6.13181   2
  -3  15   1 119.026 5.01043  -1
   3  15   0 119.026 5.01043   2
  -1  15   1 9.47294 5.85146  -1
   1  15   1 9.47294 5.85146   2
   1  15   1 4.83646 5.21523  -1
  -1  15   1 4.83646 5.21523   2
   3  15   1 14.2549 3.44303  -1
  -3  15   2 14.2549 3.44303   2
   5  15   1 0.98302 6.28501  -1
  -5  15   3 0.98302 6.28501   2
   7  15   1 8.67518 7.18567  -1
  -7  15   3 8.67518 7.18567   2
   9  15   1 5.68575 4.69825  -1
  -9  15   4 5.68575 4.69825   2
  11  15   1 40.2074 10.0617  -1
 -11  15   5 40.2074 10.0617   2
  13  15   1 18.2632 13.6902  -1
 -13  15   5 18.2632 13.6902   2
  15  15   1 11.9324 8.37315  -1
 -15  15   6 11.9324 8.37315   2
  -8  16   1 29.1340 13.9367  -1
  -8  16   2 29.1340 13.9367   2
  -6  16   1 3.29705 6.47261  -1
  -6  16   1 3.29705 6.47261   2
  -4  16   1 25.5611 10.6192  -1
   4  16   0 25.5611 10.6192   2
  -2  16   1 11.8342 10.5380  -1
   2  16   0 11.8342 10.5380   2
   0  16   1 -6.7608 5.78692  -1
   0  16   1 -6.7608 5.78692   2
   2  16   1 30.1979 10.8019  -1
  -2  16   2 30.1979 10.8019   2
   4  16   1 34.0461 10.3435  -1
  -4  16   2 34.0461 10.3435   2
   6  16   1 30.3155 7.03676  -1
  -6  16   3 30.3155 7.03676   2
 -28   0   2 6.53753 7.88303  -1
 -28   0   7 6.53753 7.88303   2
 -26   0   2 -4.4603 4.46562  -1
 -26   0   7 -4.4603 4.46562   2
 -24   0   2 8.28033 2.44203  -1
 -24   0   6 8.28033 2.44203   2
 -22   0   2 3.85686 3.40488  -1
 -22   0   5 3.85686 3.40488   2
 -20   0   2 156.913 4.86030  -1
 -20   0   5 156.913 4.86030   2
 -18   0   2 253.319 4.58778  -1
 -18   0   4 253.319 4.58778   2
 -16   0   2 19.9161 4.16087  -1
 -16   0   3 19.9161 4.16087   2
 -14   0   2 381.662 10.1769  -1
 -14   0   3 381.662 10.1769   2
 -12   0   2 1849.54 21.5348  -1
 -12   0   2 1849.54 21.5348   2
 -10   0   2 804.043 21.8662  -1
 -10   0   1 804.043 21.8662   2
  -8   0   2 3394.98 90.5770  -1
  -8   0   1 3394.98 90.5770   2
  -6   0   2 7546.56 109.316  -1
   6   0   0 7546.56 109.316   2
  -4   0   2 1078.77 17.4685   2
  -4   0   2 945.428 34.7178  -1
   4   0   1 945.428 34.7178   2
  -2   0   2 43.1538 1.44125   2
  -2   0   2 14.6482 1.29645  -1
   2   0   1 14.6482 1.29645   2
   0   0   2 961.936 24.8552  -1
   0   0   2 961.936 24.8552   2
   2   0   2 13.2815 1.22426  -1
  -2   0   3 13.2815 1.22426   2
   6   0   2 2299.11 34.5551  -1
  -6   0   4 2299.11 34.5551   2
  10   0   2 54.6574 4.88280  -1
 -10   0   5 54.6574 4.88280   2
  12   0   2 941.852 11.2869  -1
 -12   0   6 941.852 11.2869   2
  14   0   2 21.0327 3.05224  -1
 -14   0   7 21.0327 3.05224   2
  16   0   2 43.1918 3.51709  -1
 -16   0   7 43.1918 3.51709   2
  18   0   2 263.786 4.78362  -1
 -18   0   8 263.786 4.78362   2
  20   0   2 181.133 5.14269  -1
 -20   0   9 181.133 5.14269   2
  22   0   2 68.6026 4.22012  -1
 -22   0   9 68.6026 4.22012   2
  24   0   2 101.721 3.80463  -1
 -24   0  10 101.721 3.80463   2
  26   0   2 106.619 7.16103  -1
 -26   0  11 106.619 7.16103   2
 -33   1   2 -0.1497 6.68706  -1
 -33   1   9 -0.1497 6.68706   2
 -31   1   2 -3.6407 6.59151  -1
 -31   1   8 -3.6407 6.59151   2
 -29   1   2 22.5664 5.36465  -1
 -29   1   8 22.5664 5.36465   2
 -27   1   2 31.2401 3.20718  -1
 -27   1   7 31.2401 3.20718   2
 -25   1   2 5.63133 3.60260  -1
 -25   1   6 5.63133 3.60260   2
 -23   1   2 50.1996 3.11746  -1
 -23   1   6 50.1996 3.11746   2
 -21   1   2 210.946 3.45930  -1
 -21   1   5 210.946 3.45930   2
 -19   1   2 20.7184 2.68753  -1
 -19   1   4 20.7184 2.68753   2
 -17   1   2 26.5094 1.97863  -1
 -17   1   4 26.5094 1.97863   2
 -15   1   2 11.1294 0.76565  -1
 -15   1   3 11.1294 0.76565   2
 -13   1   2 494.989 8.61667  -1
 -13   1   2 494.989 8.61667   2
 -11   1   2 349.134 5.97845  -1
 -11   1   2 349.134 5.97845   2
  -9   1   2 513.794 4.95891  -1
  -9   1   1 513.794 4.95891   2
  -7   1   2 874.508 23.0693  -1
   7   1   0 874.508 23.0693   2
  -5   1   2 1463.54 58.2551  -1
   5   1   0 1463.54 58.2551   2
  -3   1   2 13.5425 0.42335  -1
   3   1   1 13.5425 0.42335   2
  -1   1   2 19.2234 0.54967   2
   1   1   2 310.743 4.48242   2
   3   1   2 104.746 1.86696  -1
  -3   1   3 104.746 1.86696   2
   5   1   2 12.5308 3.85809  -1
  -5   1   4 12.5308 3.85809   2
   7   1   2 220.586 7.25351  -1
  -7   1   4 220.586 7.25351   2
   9   1   2 522.369 5.25640  -1
  -9   1   5 522.369 5.25640   2
  11   1   2 435.204 6.53773  -1
 -11   1   6 435.204 6.53773   2
  13   1   2 177.427 3.27069  -1
 -13   1   6 177.427 3.27069   2
  15   1   2 57.8306 1.24056  -1
 -15   1   7 57.8306 1.24056   2
  17   1   2 16.5865 1.76709  -1
 -17   1   8 16.5865 1.76709   2
  19   1   2 1.63123 1.73251  -1
 -19   1   8 1.63123 1.73251   2
  21   1   2 135.555 2.91965  -1
 -21   1   9 135.555 2.91965   2
  23   1   2 84.2533 4.73159  -1
 -23   1  10 84.2533 4.73159   2
  25   1   2 49.9826 4.95490  -1
 -25   1  10 49.9826 4.95490   2
  27   1   2 82.4433 4.38847  -1
 -27   1  11 82.4433 4.38847   2
  29   1   2 10.4903 7.29728  -1
 -29   1  12 10.4903 7.29728   2
  31   1   2 17.0576 12.4823  -1
 -31   1  12 17.0576 12.4823   2
  33   1   2 1.50456 9.12996  -1
 -33   1  13 1.50456 9.12996   2
 -36   2   2 -1.5229 10.4868  -1
 -36   2  10 -1.5229 10.4868   2
 -34   2   2 10.1242 13.1577  -1
 -34   2   9 10.1242 13.1577   2
 -32   2   2 8.35273 8.54952  -1
 -32   2   9 8.35273 8.54952   2
 -30   2   2 7.38886 3.00873  -1
 -30   2   8 7.38886 3.00873   2
 -28   2   2 66.2692 4.32388  -1
 -28   2   7 66.2692 4.32388   2
 -26   2   2 152.904 5.01490  -1
 -26   2   7 152.904 5.01490   2
 -24   2   2 81.3082 3.18470  -1
 -24   2   6 81.3082 3.18470   2
 -22   2   2 224.443 5.24184  -1
 -22   2   5 224.443 5.24184   2
 -20   2   2 299.812 6.41109  -1
 -20   2   5 299.812 6.41109   2
 -18   2   2 74.4906 1.69870  -1
 -18   2   4 74.4906 1.69870   2
 -16   2   2 133.384 3.80171  -1
 -16   2   3 133.384 3.80171   2
 -14   2   2 71.0347 2.48630  -1
 -14   2   3 71.0347 2.48630   2
 -12   2   2 38.3861 1.05712  -1
 -12   2   2 38.3861 1.05712   2
 -10   2   2 30.3204 2.19258  -1
 -10   2   1 30.3204 2.19258   2
  -8   2   2 345.838 14.9478  -1
  -8   2   1 345.838 14.9478   2
  -6   2   2 491.095 5.92965  -1
   6   2   0 491.095 5.92965   2
  -4   2   2 2550.66 68.5348  -1
   4   2   1 2550.66 68.5348   2
  -2   2   2 408.130 17.1435  -1
   2   2   1 408.130 17.1435   2
   0   2   2 6.99875 0.52758  -1
   0   2   2 6.99875 0.52758   2
   2   2   2 233.712 10.6207  -1
  -2   2   3 233.712 10.6207   2
   4   2   2 106.840 6.67140  -1
  -4   2   3 106.840 6.67140   2
   6   2   2 808.495 10.6836  -1
  -6   2   4 808.495 10.6836   2
   8   2   2 1495.59 41.2043  -1
  -8   2   5 1495.59 41.2043   2
  10   2   2 842.333 19.1972  -1
 -10   2   5 842.333 19.1972   2
  12   2   2 221.714 2.53664  -1
 -12   2   6 221.714 2.53664   2
  14   2   2 216.980 4.18796  -1
 -14   2   7 216.980 4.18796   2
  16   2   2 142.159 3.41377  -1
 -16   2   7 142.159 3.41377   2
  18   2   2 15.6277 1.41466  -1
 -18   2   8 15.6277 1.41466   2
  20   2   2 61.6740 2.70981  -1
 -20   2   9 61.6740 2.70981   2
  22   2   2 35.6053 3.49375  -1
 -22   2   9 35.6053 3.49375   2
  24   2   2 35.0908 2.88595  -1
 -24   2  10 35.0908 2.88595   2
  26   2   2 70.4476 5.04082  -1
 -26   2  11 70.4476 5.04082   2
  28   2   2 26.3044 6.24747  -1
 -28   2  11 26.3044 6.24747   2
  30   2   2 5.37605 3.79380  -1
 -30   2  12 5.37605 3.79380   2
  32   2   2 24.1772 9.72792  -1
 -32   2  13 24.1772 9.72792   2
  34   2   2 -5.3234 13.5569  -1
 -34   2  13 -5.3234 13.5569   2
 -35   3   2 -0.0863 14.8016  -1
 -35   3  10 -0.0863 14.8016   2
 -33   3   2 2.15050 4.72421  -1
 -33   3   9 2.15050 4.72421   2
 -31   3   2 2.21599 6.32234  -1
 -31   3   8 2.21599 6.32234   2
 -29   3   2 37.1876 4.27444  -1
 -29   3   8 37.1876 4.27444   2
 -27   3   2 98.6789 3.76854  -1
 -27   3   7 98.6789 3.76854   2
 -25   3   2 96.0989 4.28309  -1
 -25   3   6 96.0989 4.28309   2
 -23   3   2 198.730 4.82731  -1
 -23   3   6 198.730 4.82731   2
 -21   3   2 182.657 3.45432  -1
 -21   3   5 182.657 3.45432   2
 -19   3   2 59.7995 3.68772  -1
 -19   3   4 59.7995 3.68772   2
 -17   3   2 82.5990 3.87736  -1
 -17   3   4 82.5990 3.87736   2
 -15   3   2 271.418 3.29289  -1
 -15   3   3 271.418 3.29289   2
 -13   3   2 17.3906 2.59824  -1
 -13   3   2 17.3906 2.59824   2
 -11   3   2 100.468 4.53694  -1
 -11   3   2 100.468 4.53694   2
  -9   3   2 530.281 5.61460  -1
  -9   3   1 530.281 5.61460   2
  -7   3   2 754.175 17.1283  -1
   7   3   0 754.175 17.1283   2
  -5   3   2 182.779 9.65516  -1
   5   3   0 182.779 9.65516   2
  -3   3   2 169.768 2.43270  -1
   3   3   1 169.768 2.43270   2
  -1   3   2 213.286 10.6176  -1
   1   3   2 213.286 10.6176   2
   1   3   2 197.250 9.82613  -1
  -1   3   2 197.250 9.82613   2
   3   3   2 141.277 1.83042  -1
  -3   3   3 141.277 1.83042   2
   5   3   2 67.7459 3.58653  -1
  -5   3   4 67.7459 3.58653   2
   7   3   2 129.645 4.00045  -1
  -7   3   4 129.645 4.00045   2
   9   3   2 57.7186 1.28948  -1
  -9   3   5 57.7186 1.28948   2
  11   3   2 480.959 10.1892  -1
 -11   3   6 480.959 10.1892   2
  13   3   2 191.089 5.80258  -1
 -13   3   6 191.089 5.80258   2
  15   3   2 30.1603 1.45448  -1
 -15   3   7 30.1603 1.45448   2
  17   3   2 51.3520 3.26004  -1
 -17   3   8 51.3520 3.26004   2
  19   3   2 26.5331 2.58125  -1
 -19   3   8 26.5331 2.58125   2
  21   3   2 8.91269 2.04304  -1
 -21   3   9 8.91269 2.04304   2
  23   3   2 29.9543 4.19974  -1
 -23   3  10 29.9543 4.19974   2
  25   3   2 29.0674 4.37889  -1
 -25   3  10 29.0674 4.37889   2
  27   3   2 14.4037 2.79601  -1
 -27   3  11 14.4037 2.79601   2
  29   3   2 16.6292 5.17907  -1
 -29   3  12 16.6292 5.17907   2
  31   3   2 16.5292 6.66933  -1
 -31   3  12 16.5292 6.66933   2
  33   3   2 1.45153 5.18534  -1
 -33   3  13 1.45153 5.18534   2
  35   3   2 -6.2748 15.5860  -1
 -35   3  14 -6.2748 15.5860   2
 -34   4   2 19.1867 15.2070  -1
 -34   4   9 19.1867 15.2070   2
 -32   4   2 25.6760 9.49839  -1
 -32   4   9 25.6760 9.49839   2
 -30   4   2 -3.8870 5.30804  -1
 -30   4   8 -3.8870 5.30804   2
 -28   4   2 19.3529 4.81444  -1
 -28   4   7 19.3529 4.81444   2
 -26   4   2 19.3610 3.48796  -1
 -26   4   7 19.3610 3.48796   2
 -24   4   2 76.4464 3.71020  -1
 -24   4   6 76.4464 3.71020   2
 -22   4   2 28.1966 3.87627  -1
 -22   4   5 28.1966 3.87627   2
 -20   4   2 85.4499 3.98068  -1
 -20   4   5 85.4499 3.98068   2
 -18   4   2 82.6353 2.43429  -1
 -18   4   4 82.6353 2.43429   2
 -16   4   2 97.6293 3.76368  -1
 -16   4   3 97.6293 3.76368   2
 -14   4   2 187.356 5.40672  -1
 -14   4   3 187.356 5.40672   2
 -12   4   2 124.092 1.97796  -1
 -12   4   2 124.092 1.97796   2
 -10   4   2 23.5317 3.11298  -1
 -10   4   1 23.5317 3.11298   2
  -8   4   2 691.995 28.1340  -1
  -8   4   1 691.995 28.1340   2
  -6   4   2 70.5356 1.34083  -1
   6   4   0 70.5356 1.34083   2
  -4   4   2 65.3720 4.03649  -1
   4   4   1 65.3720 4.03649   2
  -2   4   2 720.947 20.6449  -1
   2   4   1 720.947 20.6449   2
   0   4   2 0.38806 0.49701  -1
   0   4   2 0.38806 0.49701   2
   2   4   2 554.454 16.3707  -1
  -2   4   3 554.454 16.3707   2
   4   4   2 171.933 6.67113  -1
  -4   4   3 171.933 6.67113   2
   6   4   2 46.4590 1.19519  -1
  -6   4   4 46.4590 1.19519   2
   8   4   2 216.398 7.60200  -1
  -8   4   5 216.398 7.60200   2
  10   4   2 108.318 4.51809  -1
 -10   4   5 108.318 4.51809   2
  12   4   2 287.819 3.73783  -1
 -12   4   6 287.819 3.73783   2
  14   4   2 177.807 4.21437  -1
 -14   4   7 177.807 4.21437   2
  16   4   2 25.5556 3.10693  -1
 -16   4   7 25.5556 3.10693   2
  18   4   2 38.5028 2.07382  -1
 -18   4   8 38.5028 2.07382   2
  20   4   2 0.36674 3.55998  -1
 -20   4   9 0.36674 3.55998   2
  22   4   2 -5.1588 4.06021  -1
 -22   4   9 -5.1588 4.06021   2
  24   4   2 16.3199 2.40687  -1
 -24   4  10 16.3199 2.40687   2
  26   4   2 9.55458 3.54032  -1
 -26   4  11 9.55458 3.54032   2
  28   4   2 -2.8094 5.52436  -1
 -28   4  11 -2.8094 5.52436   2
  30   4   2 16.7989 4.66198  -1
 -30   4  12 16.7989 4.66198   2
  32   4   2 5.58773 9.04259  -1
 -32   4  13 5.58773 9.04259   2
  34   4   2 0.26668 15.1716  -1
 -34   4  13 0.26668 15.1716   2
 -35   5   2 28.9467 16.0028  -1
 -35   5  10 28.9467 16.0028   2
 -33   5   2 24.1628 8.13866  -1
 -33   5   9 24.1628 8.13866   2
 -31   5   2 11.8859 8.60683  -1
 -31   5   8 11.8859 8.60683   2
 -29   5   2 2.95649 8.08241  -1
 -29   5   8 2.95649 8.08241   2
 -27   5   2 -1.3213 3.54615  -1
 -27   5   7 -1.3213 3.54615   2
 -25   5   2 2.62855 4.81072  -1
 -25   5   6 2.62855 4.81072   2
 -23   5   2 5.62280 4.61830  -1
 -23   5   6 5.62280 4.61830   2
 -21   5   2 15.4535 2.52019  -1
 -21   5   5 15.4535 2.52019   2
 -19   5   2 22.8325 3.29851  -1
 -19   5   4 22.8325 3.29851   2
 -17   5   2 15.0220 3.08107  -1
 -17   5   4 15.0220 3.08107   2
 -15   5   2 70.5990 1.81282  -1
 -15   5   3 70.5990 1.81282   2
 -13   5   2 48.5674 2.87875  -1
 -13   5   2 48.5674 2.87875   2
 -11   5   2 42.4355 3.35312  -1
 -11   5   2 42.4355 3.35312   2
  -9   5   2 702.978 6.77204  -1
  -9   5   1 702.978 6.77204   2
  -7   5   2 274.312 7.43480  -1
   7   5   0 274.312 7.43480   2
  -5   5   2 55.6675 2.55461  -1
   5   5   0 55.6675 2.55461   2
  -3   5   2 1850.43 17.5905  -1
   3   5   1 1850.43 17.5905   2
  -1   5   2 183.219 6.18569  -1
   1   5   2 183.219 6.18569   2
   1   5   2 194.953 6.60064  -1
  -1   5   2 194.953 6.60064   2
   3   5   2 116.777 1.57520  -1
  -3   5   3 116.777 1.57520   2
   5   5   2 2.67042 2.85313  -1
  -5   5   4 2.67042 2.85313   2
   7   5   2 47.4249 2.15865  -1
  -7   5   4 47.4249 2.15865   2
   9   5   2 715.930 7.13593  -1
  -9   5   5 715.930 7.13593   2
  11   5   2 173.017 4.87599  -1
 -11   5   6 173.017 4.87599   2
  13   5   2 103.405 3.16463  -1
 -13   5   6 103.405 3.16463   2
  15   5   2 134.607 2.54295  -1
 -15   5   7 134.607 2.54295   2
  17   5   2 50.6675 2.90585  -1
 -17   5   8 50.6675 2.90585   2
  19   5   2 5.15931 3.17650  -1
 -19   5   8 5.15931 3.17650   2
  21   5   2 11.7489 2.77783  -1
 -21   5   9 11.7489 2.77783   2
  23   5   2 55.6816 4.93938  -1
 -23   5  10 55.6816 4.93938   2
  25   5   2 21.0667 4.75304  -1
 -25   5  10 21.0667 4.75304   2
  27   5   2 22.6631 4.91731  -1
 -27   5  11 22.6631 4.91731   2
  29   5   2 -4.2395 7.95315  -1
 -29   5  12 -4.2395 7.95315   2
  31   5   2 2.83541 10.9249  -1
 -31   5  12 2.83541 10.9249   2
  33   5   2 -2.0947 10.4228  -1
 -33   5  13 -2.0947 10.4228   2
 -30   6   2 9.18704 5.97208  -1
 -30   6   8 9.18704 5.97208   2
 -28   6   2 12.6560 10.1047  -1
 -28   6   7 12.6560 10.1047   2
 -26   6   2 20.5306 5.62708  -1
 -26   6   7 20.5306 5.62708   2
 -24   6   2 184.237 5.55487  -1
 -24   6   6 184.237 5.55487   2
 -22   6   2 53.5500 4.51234  -1
 -22   6   5 53.5500 4.51234   2
 -20   6   2 44.4455 4.00586  -1
 -20   6   5 44.4455 4.00586   2
 -18   6   2 217.037 4.99969  -1
 -18   6   4 217.037 4.99969   2
 -16   6   2 18.2240 2.67743  -1
 -16   6   3 18.2240 2.67743   2
 -14   6   2 27.8109 2.58351  -1
 -14   6   3 27.8109 2.58351   2
 -12   6   2 32.2879 1.36808  -1
 -12   6   2 32.2879 1.36808   2
 -10   6   2 242.626 5.21594  -1
 -10   6   1 242.626 5.21594   2
  -8   6   2 340.707 6.68001  -1
  -8   6   1 340.707 6.68001   2
  -6   6   2 485.618 4.51305  -1
   6   6   0 485.618 4.51305   2
  -4   6   2 688.191 10.6270  -1
   4   6   1 688.191 10.6270   2
  -2   6   2 721.011 9.81991  -1
   2   6   1 721.011 9.81991   2
   0   6   2 0.20979 0.66448  -1
   0   6   2 0.20979 0.66448   2
   2   6   2 12.7810 2.33726  -1
  -2   6   3 12.7810 2.33726   2
   4   6   2 106.515 3.59594  -1
  -4   6   3 106.515 3.59594   2
   6   6   2 154.612 1.86825  -1
  -6   6   4 154.612 1.86825   2
   8   6   2 288.870 5.71667  -1
  -8   6   5 288.870 5.71667   2
  10   6   2 214.756 4.58283  -1
 -10   6   5 214.756 4.58283   2
  12   6   2 213.861 3.28305  -1
 -12   6   6 213.861 3.28305   2
  14   6   2 117.292 3.52998  -1
 -14   6   7 117.292 3.52998   2
  16   6   2 79.2524 3.11664  -1
 -16   6   7 79.2524 3.11664   2
  18   6   2 -1.0983 2.15291  -1
 -18   6   8 -1.0983 2.15291   2
  20   6   2 3.21408 3.96275  -1
 -20   6   9 3.21408 3.96275   2
  22   6   2 24.7113 4.70916  -1
 -22   6   9 24.7113 4.70916   2
  24   6   2 56.6226 3.89202  -1
 -24   6  10 56.6226 3.89202   2
  26   6   2 5.30982 7.91010  -1
 -26   6  11 5.30982 7.91010   2
  28   6   2 28.0029 7.88716  -1
 -28   6  11 28.0029 7.88716   2
  30   6   2 20.4971 6.10466  -1
 -30   6  12 20.4971 6.10466   2
  32   6   2 14.6162 15.2910  -1
 -32   6  13 14.6162 15.2910   2
 -33   7   2 -1.6976 11.5111  -1
 -33   7   9 -1.6976 11.5111   2
 -29   7   2 5.08429 10.9942  -1
 -29   7   8 5.08429 10.9942   2
 -27   7   2 46.5461 5.28735  -1
 -27   7   7 46.5461 5.28735   2
 -25   7   2 243.243 9.34019  -1
 -25   7   6 243.243 9.34019   2
 -23   7   2 370.899 10.4918  -1
 -23   7   6 370.899 10.4918   2
 -21   7   2 113.026 4.49063  -1
 -21   7   5 113.026 4.49063   2
 -19   7   2 154.448 5.57157  -1
 -19   7   4 154.448 5.57157   2
 -17   7   2 232.115 5.34619  -1
 -17   7   4 232.115 5.34619   2
 -15   7   2 36.0514 1.91667  -1
 -15   7   3 36.0514 1.91667   2
 -13   7   2 36.7497 2.77719  -1
 -13   7   2 36.7497 2.77719   2
 -11   7   2 0.75027 2.28084  -1
 -11   7   2 0.75027 2.28084   2
  -9   7   2 139.955 2.21493  -1
  -9   7   1 139.955 2.21493   2
  -7   7   2 333.919 5.28491  -1
   7   7   0 333.919 5.28491   2
  -5   7   2 170.255 3.61201  -1
   5   7   0 170.255 3.61201   2
  -3   7   2 159.832 2.06717  -1
   3   7   1 159.832 2.06717   2
  -1   7   2 80.6814 2.85706  -1
   1   7   2 80.6814 2.85706   2
   1   7   2 72.8810 2.45732  -1
  -1   7   2 72.8810 2.45732   2
   3   7   2 201.353 2.43639  -1
  -3   7   3 201.353 2.43639   2
   5   7   2 338.937 5.26568  -1
  -5   7   4 338.937 5.26568   2
   7   7   2 536.195 7.51999  -1
  -7   7   4 536.195 7.51999   2
   9   7   2 528.333 5.53747  -1
  -9   7   5 528.333 5.53747   2
  11   7   2 219.387 4.26065  -1
 -11   7   6 219.387 4.26065   2
  13   7   2 359.483 5.60890  -1
 -13   7   6 359.483 5.60890   2
  15   7   2 30.7111 2.14156  -1
 -15   7   7 30.7111 2.14156   2
  17   7   2 11.3839 3.12472  -1
 -17   7   8 11.3839 3.12472   2
  19   7   2 8.25234 3.71382  -1
 -19   7   8 8.25234 3.71382   2
  21   7   2 10.2581 3.08112  -1
 -21   7   9 10.2581 3.08112   2
  23   7   2 94.7942 6.17719  -1
 -23   7  10 94.7942 6.17719   2
  25   7   2 42.4685 4.98088  -1
 -25   7  10 42.4685 4.98088   2
  27   7   2 15.2836 4.94265  -1
 -27   7  11 15.2836 4.94265   2
  29   7   2 70.2339 9.77116  -1
 -29   7  12 70.2339 9.77116   2
  31   7   2 25.6116 14.7136  -1
 -31   7  12 25.6116 14.7136   2
 -30   8   2 20.5985 11.1451  -1
 -30   8   8 20.5985 11.1451   2
 -28   8   2 30.9678 16.0851  -1
 -28   8   7 30.9678 16.0851   2
 -26   8   2 84.7627 8.95817  -1
 -26   8   7 84.7627 8.95817   2
 -24   8   2 177.476 5.91447  -1
 -24   8   6 177.476 5.91447   2
 -22   8   2 111.812 6.08584  -1
 -22   8   5 111.812 6.08584   2
 -20   8   2 133.968 6.05829  -1
 -20   8   5 133.968 6.05829   2
 -18   8   2 148.492 3.97285  -1
 -18   8   4 148.492 3.97285   2
 -16   8   2 47.3599 3.54155  -1
 -16   8   3 47.3599 3.54155   2
 -14   8   2 54.4812 3.02898  -1
 -14   8   3 54.4812 3.02898   2
 -12   8   2 52.7913 1.80064  -1
 -12   8   2 52.7913 1.80064   2
 -10   8   2 82.9319 2.73283  -1
 -10   8   1 82.9319 2.73283   2
  -8   8   2 26.8037 2.16250  -1
  -8   8   1 26.8037 2.16250   2
  -6   8   2 84.9263 1.75289  -1
   6   8   0 84.9263 1.75289   2
  -4   8   2 129.996 2.54418  -1
   4   8   1 129.996 2.54418   2
  -2   8   2 190.442 3.22722  -1
   2   8   1 190.442 3.22722   2
   0   8   2 34.6360 1.18165  -1
   0   8   2 34.6360 1.18165   2
   2   8   2 184.112 3.15584  -1
  -2   8   3 184.112 3.15584   2
   4   8   2 248.391 3.73284  -1
  -4   8   3 248.391 3.73284   2
   6   8   2 348.101 4.32975  -1
  -6   8   4 348.101 4.32975   2
   8   8   2 200.701 3.62068  -1
  -8   8   5 200.701 3.62068   2
  10   8   2 379.425 5.51365  -1
 -10   8   5 379.425 5.51365   2
  12   8   2 223.025 3.42321  -1
 -12   8   6 223.025 3.42321   2
  14   8   2 130.676 4.39051  -1
 -14   8   7 130.676 4.39051   2
  16   8   2 42.3325 3.43487  -1
 -16   8   7 42.3325 3.43487   2
  18   8   2 10.9498 2.38437  -1
 -18   8   8 10.9498 2.38437   2
  20   8   2 -4.5117 4.30434  -1
 -20   8   9 -4.5117 4.30434   2
  22   8   2 5.69638 4.52318  -1
 -22   8   9 5.69638 4.52318   2
  24   8   2 40.3662 4.19486  -1
 -24   8  10 40.3662 4.19486   2
  26   8   2 28.5073 9.59004  -1
 -26   8  11 28.5073 9.59004   2
  28   8   2 5.62942 8.93339  -1
 -28   8  11 5.62942 8.93339   2
  30   8   2 38.9721 12.4088  -1
 -30   8  12 38.9721 12.4088   2
 -27   9   2 42.1584 6.00256  -1
 -27   9   7 42.1584 6.00256   2
 -25   9   2 -4.8721 11.4535  -1
 -25   9   6 -4.8721 11.4535   2
 -23   9   2 27.0089 6.25224  -1
 -23   9   6 27.0089 6.25224   2
 -21   9   2 58.1530 4.32205  -1
 -21   9   5 58.1530 4.32205   2
 -19   9   2 19.0993 4.12475  -1
 -19   9   4 19.0993 4.12475   2
 -17   9   2 24.9812 3.72043  -1
 -17   9   4 24.9812 3.72043   2
 -15   9   2 26.0275 1.96204  -1
 -15   9   3 26.0275 1.96204   2
 -13   9   2 7.95410 2.29700  -1
 -13   9   2 7.95410 2.29700   2
 -11   9   2 26.0161 2.77919  -1
 -11   9   2 26.0161 2.77919   2
  -9   9   2 225.071 3.74258  -1
  -9   9   1 225.071 3.74258   2
  -7   9   2 37.8713 2.67756  -1
   7   9   0 37.8713 2.67756   2
  -5   9   2 125.879 3.12467  -1
   5   9   0 125.879 3.12467   2
  -3   9   2 248.943 3.29740  -1
   3   9   1 248.943 3.29740   2
  -1   9   2 59.3932 2.40799  -1
   1   9   2 59.3932 2.40799   2
   1   9   2 61.7328 2.33224  -1
  -1   9   2 61.7328 2.33224   2
   3   9   2 49.8539 1.59845  -1
  -3   9   3 49.8539 1.59845   2
   5   9   2 55.8480 2.61086  -1
  -5   9   4 55.8480 2.61086   2
   7   9   2 50.3201 2.64606  -1
  -7   9   4 50.3201 2.64606   2
   9   9   2 262.298 4.53744  -1
  -9   9   5 262.298 4.53744   2
  11   9   2 108.066 3.29413  -1
 -11   9   6 108.066 3.29413   2
  13   9   2 34.5432 2.98950  -1
 -13   9   6 34.5432 2.98950   2
  15   9   2 46.3052 2.43446  -1
 -15   9   7 46.3052 2.43446   2
  17   9   2 -2.6341 3.80640  -1
 -17   9   8 -2.6341 3.80640   2
  19   9   2 9.17842 4.52224  -1
 -19   9   8 9.17842 4.52224   2
  21   9   2 21.5479 3.45539  -1
 -21   9   9 21.5479 3.45539   2
  23   9   2 13.4037 7.18139  -1
 -23   9  10 13.4037 7.18139   2
  25   9   2 6.17270 7.38779  -1
 -25   9  10 6.17270 7.38779   2
  27   9   2 34.9960 6.71426  -1
 -27   9  11 34.9960 6.71426   2
 -24  10   2 9.59985 5.03630  -1
 -24  10   6 9.59985 5.03630   2
 -22  10   2 -6.3671 6.51950  -1
 -22  10   5 -6.3671 6.51950   2
 -20  10   2 22.3474 4.82656  -1
 -20  10   5 22.3474 4.82656   2
 -18  10   2 20.5481 2.84959  -1
 -18  10   4 20.5481 2.84959   2
 -16  10   2 7.59033 3.15808  -1
 -16  10   3 7.59033 3.15808   2
 -14  10   2 49.5364 3.10363  -1
 -14  10   3 49.5364 3.10363   2
 -12  10   2 78.7774 2.62405  -1
 -12  10   2 78.7774 2.62405   2
 -10  10   2 106.119 3.61868  -1
 -10  10   1 106.119 3.61868   2
  -8  10   2 133.983 3.85373  -1
  -8  10   1 133.983 3.85373   2
  -6  10   2 198.953 3.31755  -1
   6  10   0 198.953 3.31755   2
  -4  10   2 93.7086 2.75533  -1
   4  10   1 93.7086 2.75533   2
  -2  10   2 149.371 3.17856  -1
   2  10   1 149.371 3.17856   2
   0  10   2 181.989 2.93359  -1
   0  10   2 181.989 2.93359   2
   2  10   2 48.5805 2.85984  -1
  -2  10   3 48.5805 2.85984   2
   4  10   2 23.7647 2.28822  -1
  -4  10   3 23.7647 2.28822   2
   6  10   2 10.1800 1.69883  -1
  -6  10   4 10.1800 1.69883   2
   8  10   2 48.0897 3.01346  -1
  -8  10   5 48.0897 3.01346   2
  10  10   2 18.4855 3.00569  -1
 -10  10   5 18.4855 3.00569   2
  12  10   2 48.7229 2.57840  -1
 -12  10   6 48.7229 2.57840   2
  14  10   2 23.7615 3.27225  -1
 -14  10   7 23.7615 3.27225   2
  16  10   2 11.8823 3.09009  -1
 -16  10   7 11.8823 3.09009   2
  18  10   2 1.13062 3.05722  -1
 -18  10   8 1.13062 3.05722   2
  20  10   2 28.5159 6.39938  -1
 -20  10   9 28.5159 6.39938   2
  22  10   2 20.3459 6.76666  -1
 -22  10   9 20.3459 6.76666   2
  24  10   2 16.9087 5.40694  -1
 -24  10  10 16.9087 5.40694   2
  26  10   2 18.9289 14.2847  -1
 -26  10  11 18.9289 14.2847   2
 -27  11   2 19.1558 11.7104  -1
 -27  11   7 19.1558 11.7104   2
 -23  11   2 54.7117 14.6736  -1
 -23  11   6 54.7117 14.6736   2
 -21  11   2 24.4651 4.53035  -1
 -21  11   5 24.4651 4.53035   2
 -19  11   2 1.33514 5.96572  -1
 -19  11   4 1.33514 5.96572   2
 -17  11   2 10.9092 4.51466  -1
 -17  11   4 10.9092 4.51466   2
 -15  11   2 52.1747 2.70106  -1
 -15  11   3 52.1747 2.70106   2
 -13  11   2 25.9988 3.39460  -1
 -13  11   2 25.9988 3.39460   2
 -11  11   2 76.1781 3.79242  -1
 -11  11   2 76.1781 3.79242   2
  -9  11   2 59.6743 2.87010  -1
  -9  11   1 59.6743 2.87010   2
  -7  11   2 75.7245 3.52125  -1
   7  11   0 75.7245 3.52125   2
  -5  11   2 86.7558 3.20413  -1
   5  11   0 86.7558 3.20413   2
  -3  11   2 10.9630 1.74572  -1
   3  11   1 10.9630 1.74572   2
  -1  11   2 25.2705 2.64417  -1
   1  11   2 25.2705 2.64417   2
   1  11   2 27.0882 2.62215  -1
  -1  11   2 27.0882 2.62215   2
   3  11   2 7.15750 1.77302  -1
  -3  11   3 7.15750 1.77302   2
   5  11   2 41.0514 3.08372  -1
  -5  11   4 41.0514 3.08372   2
   7  11   2 17.6590 2.98072  -1
  -7  11   4 17.6590 2.98072   2
   9  11   2 13.7894 2.19489  -1
  -9  11   5 13.7894 2.19489   2
  11  11   2 97.0026 4.06416  -1
 -11  11   6 97.0026 4.06416   2
  13  11   2 69.5727 4.20468  -1
 -13  11   6 69.5727 4.20468   2
  15  11   2 3.50312 2.40554  -1
 -15  11   7 3.50312 2.40554   2
  17  11   2 6.96938 4.36705  -1
 -17  11   8 6.96938 4.36705   2
  19  11   2 30.0948 6.22450  -1
 -19  11   8 30.0948 6.22450   2
  21  11   2 3.12602 3.60738  -1
 -21  11   9 3.12602 3.60738   2
  23  11   2 11.5192 9.36010  -1
 -23  11  10 11.5192 9.36010   2
  25  11   2 -0.7238 14.0192  -1
 -25  11  10 -0.7238 14.0192   2
  27  11   2 18.3683 11.2283  -1
 -27  11  11 18.3683 11.2283   2
 -20  12   2 41.7405 9.33345  -1
 -20  12   5 41.7405 9.33345   2
 -18  12   2 22.6478 3.77692  -1
 -18  12   4 22.6478 3.77692   2
 -16  12   2 13.9218 5.81794  -1
 -16  12   3 13.9218 5.81794   2
 -14  12   2 22.9538 4.28592  -1
 -14  12   3 22.9538 4.28592   2
 -12  12   2 0.12647 2.39136  -1
 -12  12   2 0.12647 2.39136   2
 -10  12   2 17.6324 3.72230  -1
 -10  12   1 17.6324 3.72230   2
  -8  12   2 17.4019 3.93551  -1
  -8  12   1 17.4019 3.93551   2
  -6  12   2 10.9729 2.27377  -1
   6  12   0 10.9729 2.27377   2
  -4  12   2 63.5254 3.18265  -1
   4  12   1 63.5254 3.18265   2
  -2  12   2 37.8411 3.05713  -1
   2  12   1 37.8411 3.05713   2
   0  12   2 0.52803 1.88088  -1
   0  12   2 0.52803 1.88088   2
   2  12   2 15.5477 3.02445  -1
  -2  12   3 15.5477 3.02445   2
   4  12   2 22.2925 2.96919  -1
  -4  12   3 22.2925 2.96919   2
   6  12   2 25.6222 2.44884  -1
  -6  12   4 25.6222 2.44884   2
   8  12   2 79.9251 4.47600  -1
  -8  12   5 79.9251 4.47600   2
  10  12   2 110.421 4.30733  -1
 -10  12   5 110.421 4.30733   2
  12  12   2 33.2611 2.88892  -1
 -12  12   6 33.2611 2.88892   2
  14  12   2 14.7769 4.55918  -1
 -14  12   7 14.7769 4.55918   2
  16  12   2 38.6620 7.38390  -1
 -16  12   7 38.6620 7.38390   2
  18  12   2 2.56988 3.61260  -1
 -18  12   8 2.56988 3.61260   2
  20  12   2 13.0614 9.33933  -1
 -20  12   9 13.0614 9.33933   2
  22  12   2 5.82739 13.3825  -1
 -22  12   9 5.82739 13.3825   2
  24  12   2 7.85941 6.73714  -1
 -24  12  10 7.85941 6.73714   2
 -17  13   2 10.3542 8.98371  -1
 -17  13   4 10.3542 8.98371   2
 -15  13   2 10.3775 3.35095  -1
 -15  13   3 10.3775 3.35095   2
 -13  13   2 -3.0493 5.36568  -1
 -13  13   2 -3.0493 5.36568   2
 -11  13   2 17.9157 4.88135  -1
 -11  13   2 17.9157 4.88135   2
  -9  13   2 42.2691 3.25608  -1
  -9  13   1 42.2691 3.25608   2
  -7  13   2 98.2276 4.98498  -1
   7  13   0 98.2276 4.98498   2
  -5  13   2 59.9388 4.37736  -1
   5  13   0 59.9388 4.37736   2
  -3  13   2 38.1648 2.44120  -1
   3  13   1 38.1648 2.44120   2
  -1  13   2 20.2336 3.49930  -1
   1  13   2 20.2336 3.49930   2
   1  13   2 14.2187 3.24755  -1
  -1  13   2 14.2187 3.24755   2
   3  13   2 21.5751 2.34625  -1
  -3  13   3 21.5751 2.34625   2
   5  13   2 16.0381 3.80187  -1
  -5  13   4 16.0381 3.80187   2
   7  13   2 33.5734 4.18886  -1
  -7  13   4 33.5734 4.18886   2
   9  13   2 52.1270 3.31549  -1
  -9  13   5 52.1270 3.31549   2
  11  13   2 22.4222 5.56765  -1
 -11  13   6 22.4222 5.56765   2
  13  13   2 27.0007 6.60682  -1
 -13  13   6 27.0007 6.60682   2
  15  13   2 26.3249 3.67760  -1
 -15  13   7 26.3249 3.67760   2
  17  13   2 8.53841 12.7701  -1
 -17  13   8 8.53841 12.7701   2
  19  13   2 7.64293 13.1715  -1
 -19  13   8 7.64293 13.1715   2
  21  13   2 3.51667 8.51857  -1
 -21  13   9 3.51667 8.51857   2
 -18  14   2 2.03468 8.40658  -1
 -18  14   4 2.03468 8.40658   2
 -16  14   2 4.66931 13.1012  -1
 -16  14   3 4.66931 13.1012   2
 -14  14   2 -2.2177 9.06363  -1
 -14  14   3 -2.2177 9.06363   2
 -12  14   2 55.7680 4.33424  -1
 -12  14   2 55.7680 4.33424   2
 -10  14   2 68.0409 5.98867  -1
 -10  14   1 68.0409 5.98867   2
  -8  14   2 74.2426 5.79921  -1
  -8  14   1 74.2426 5.79921   2
  -6  14   2 85.9355 4.01173  -1
   6  14   0 85.9355 4.01173   2
  -4  14   2 58.5720 5.36582  -1
   4  14   1 58.5720 5.36582   2
  -2  14   2 51.3415 4.98054  -1
   2  14   1 51.3415 4.98054   2
   0  14   2 5.50809 2.51059  -1
   0  14   2 5.50809 2.51059   2
   2  14   2 10.3755 4.46249  -1
  -2  14   3 10.3755 4.46249   2
   4  14   2 26.6790 5.26906  -1
  -4  14   3 26.6790 5.26906   2
   6  14   2 31.9948 3.32694  -1
  -6  14   4 31.9948 3.32694   2
   8  14   2 19.4632 5.47568  -1
  -8  14   5 19.4632 5.47568   2
  10  14   2 50.3100 6.38788  -1
 -10  14   5 50.3100 6.38788   2
  12  14   2 61.1814 4.85072  -1
 -12  14   6 61.1814 4.85072   2
  14  14   2 2.75575 13.3463  -1
 -14  14   7 2.75575 13.3463   2
  16  14   2 -8.4446 12.9964  -1
 -16  14   7 -8.4446 12.9964   2
  18  14   2 3.57325 8.77251  -1
 -18  14   8 3.57325 8.77251   2
 -15  15   2 3.04192 6.15858  -1
 -15  15   3 3.04192 6.15858   2
 -13  15   2 27.9414 10.0376  -1
 -13  15   2 27.9414 10.0376   2
 -11  15   2 83.0182 9.03343  -1
 -11  15   2 83.0182 9.03343   2
  -9  15   2 51.8454 5.55498  -1
  -9  15   1 51.8454 5.55498   2
  -7  15   2 47.8615 6.79396  -1
   7  15   0 47.8615 6.79396   2
  -5  15   2 95.3828 7.29956  -1
   5  15   0 95.3828 7.29956   2
  -3  15   2 13.8091 3.64917  -1
   3  15   1 13.8091 3.64917   2
  -1  15   2 21.9957 5.98488  -1
   1  15   2 21.9957 5.98488   2
   1  15   2 27.0108 5.65967  -1
  -1  15   2 27.0108 5.65967   2
   3  15   2 5.87635 3.24009  -1
  -3  15   3 5.87635 3.24009   2
   5  15   2 5.33249 5.66372  -1
  -5  15   4 5.33249 5.66372   2
   7  15   2 -3.5555 8.13513  -1
  -7  15   4 -3.5555 8.13513   2
   9  15   2 27.3795 4.70683  -1
  -9  15   5 27.3795 4.70683   2
  11  15   2 43.6150 10.2301  -1
 -11  15   6 43.6150 10.2301   2
  13  15   2 10.5370 13.9281  -1
 -13  15   6 10.5370 13.9281   2
  -8  16   2 15.6330 15.7581  -1
  -8  16   1 15.6330 15.7581   2
  -6  16   2 36.6596 7.33585  -1
   6  16   0 36.6596 7.33585   2
  -4  16   2 50.2457 11.0414  -1
   4  16   1 50.2457 11.0414   2
  -2  16   2 19.2095 10.5849  -1
   2  16   1 19.2095 10.5849   2
   0  16   2 4.37956 6.49025  -1
   0  16   2 4.37956 6.49025   2
   2  16   2 11.5604 9.99395  -1
  -2  16   3 11.5604 9.99395   2
   4  16   2 10.9695 10.6356  -1
  -4  16   3 10.9695 10.6356   2
   6  16   2 0.02716 6.08672  -1
  -6  16   4 0.02716 6.08672   2
 -30   0   3 0.20740 8.52759  -1
 -30   0   7 0.20740 8.52759   2
 -28   0   3 24.4326 6.25902  -1
 -28   0   6 24.4326 6.25902   2
 -26   0   3 4.61840 5.55328  -1
 -26   0   6 4.61840 5.55328   2
 -24   0   3 -1.6929 2.27937  -1
 -24   0   5 -1.6929 2.27937   2
 -22   0   3 5.21769 3.16855  -1
 -22   0   4 5.21769 3.16855   2
 -20   0   3 1.84596 3.03010  -1
 -20   0   4 1.84596 3.03010   2
 -18   0   3 -3.1929 1.54337  -1
 -18   0   3 -3.1929 1.54337   2
 -16   0   3 23.4136 5.71131  -1
 -16   0   2 23.4136 5.71131   2
 -14   0   3 405.604 10.7295  -1
 -14   0   2 405.604 10.7295   2
 -12   0   3 2.68224 1.05220  -1
 -12   0   1 2.68224 1.05220   2
 -10   0   3 178.639 6.62495  -1
  10   0   0 178.639 6.62495   2
  -8   0   3 884.098 24.5378  -1
   8   0   0 884.098 24.5378   2
  -6   0   3 0.27006 0.92724  -1
   6   0   1 0.27006 0.92724   2
  -4   0   3 0.85407 0.69978   2
  -4   0   3 159.201 7.15152  -1
   4   0   2 159.201 7.15152   2
  -2   0   3 9.90994 1.92486  -1
   2   0   2 9.90994 1.92486   2
   0   0   3 2.71823 0.48767  -1
   0   0   3 2.71823 0.48767   2
   2   0   3 3804.01 137.326  -1
  -2   0   4 3804.01 137.326   2
   6   0   3 -0.7681 0.82450  -1
  -6   0   5 -0.7681 0.82450   2
   8   0   3 1213.65 32.7451  -1
  -8   0   6 1213.65 32.7451   2
  10   0   3 1023.59 24.8363  -1
 -10   0   6 1023.59 24.8363   2
  12   0   3 0.30474 0.90574  -1
 -12   0   7 0.30474 0.90574   2
  14   0   3 186.502 5.45337  -1
 -14   0   8 186.502 5.45337   2
  16   0   3 51.4687 3.40477  -1
 -16   0   8 51.4687 3.40477   2
  18   0   3 -2.7208 1.61729  -1
 -18   0   9 -2.7208 1.61729   2
  20   0   3 103.486 4.91399  -1
 -20   0  10 103.486 4.91399   2
  22   0   3 6.95978 4.35813  -1
 -22   0  10 6.95978 4.35813   2
  24   0   3 -5.8512 2.38551  -1
 -24   0  11 -5.8512 2.38551   2
  26   0   3 4.09149 9.44773  -1
 -26   0  12 4.09149 9.44773   2
 -33   1   3 10.4238 6.97812  -1
 -33   1   8 10.4238 6.97812   2
 -31   1   3 9.47079 6.85871  -1
 -31   1   7 9.47079 6.85871   2
 -29   1   3 20.2856 5.47530  -1
 -29   1   7 20.2856 5.47530   2
 -27   1   3 25.9263 3.01973  -1
 -27   1   6 25.9263 3.01973   2
 -25   1   3 42.7988 3.98552  -1
 -25   1   5 42.7988 3.98552   2
 -23   1   3 142.245 3.98354  -1
 -23   1   5 142.245 3.98354   2
 -21   1   3 19.3569 1.69736  -1
 -21   1   4 19.3569 1.69736   2
 -19   1   3 4.47386 1.91993  -1
 -19   1   3 4.47386 1.91993   2
 -17   1   3 -2.2521 1.96481  -1
 -17   1   3 -2.2521 1.96481   2
 -15   1   3 10.0678 0.81746  -1
 -15   1   2 10.0678 0.81746   2
 -13   1   3 589.716 10.1314  -1
 -13   1   1 589.716 10.1314   2
 -11   1   3 80.2187 2.42788  -1
 -11   1   1 80.2187 2.42788   2
  -9   1   3 61.5983 1.10248  -1
   9   1   0 61.5983 1.10248   2
  -7   1   3 132.209 3.26596  -1
   7   1   1 132.209 3.26596   2
  -5   1   3 580.171 20.2430  -1
   5   1   1 580.171 20.2430   2
  -3   1   3 104.780 1.26084  -1
   3   1   2 104.780 1.26084   2
  -1   1   3 811.652 9.86364   2
   1   1   3 117.744 1.94080   2
   3   1   3 548.756 7.75118  -1
  -3   1   4 548.756 7.75118   2
   5   1   3 688.696 28.1761  -1
  -5   1   5 688.696 28.1761   2
   7   1   3 330.659 10.3066  -1
  -7   1   5 330.659 10.3066   2
   9   1   3 1108.21 10.4510  -1
  -9   1   6 1108.21 10.4510   2
  11   1   3 34.3850 1.44215  -1
 -11   1   7 34.3850 1.44215   2
  13   1   3 9.87041 1.95960  -1
 -13   1   7 9.87041 1.95960   2
  15   1   3 244.997 2.85171  -1
 -15   1   8 244.997 2.85171   2
  17   1   3 110.208 2.71806  -1
 -17   1   9 110.208 2.71806   2
  19   1   3 127.946 2.66398  -1
 -19   1   9 127.946 2.66398   2
  21   1   3 91.3732 2.70998  -1
 -21   1  10 91.3732 2.70998   2
  23   1   3 126.616 5.15218  -1
 -23   1  11 126.616 5.15218   2
  25   1   3 82.0758 4.96207  -1
 -25   1  11 82.0758 4.96207   2
  27   1   3 7.33340 3.32394  -1
 -27   1  12 7.33340 3.32394   2
  29   1   3 23.6260 6.70130  -1
 -29   1  13 23.6260 6.70130   2
  31   1   3 13.3521 8.61735  -1
 -31   1  13 13.3521 8.61735   2
  33   1   3 4.87797 9.43541  -1
 -33   1  14 4.87797 9.43541   2
 -36   2   3 0.38435 10.9396  -1
 -36   2   9 0.38435 10.9396   2
 -34   2   3 -16.926 13.0140  -1
 -34   2   8 -16.926 13.0140   2
 -32   2   3 3.45264 8.70113  -1
 -32   2   8 3.45264 8.70113   2
 -30   2   3 37.6527 3.41698  -1
 -30   2   7 37.6527 3.41698   2
 -28   2   3 27.1203 4.12943  -1
 -28   2   6 27.1203 4.12943   2
 -26   2   3 58.2488 3.95527  -1
 -26   2   6 58.2488 3.95527   2
 -24   2   3 100.418 3.27916  -1
 -24   2   5 100.418 3.27916   2
 -22   2   3 69.5852 3.44428  -1
 -22   2   4 69.5852 3.44428   2
 -20   2   3 82.2767 3.53241  -1
 -20   2   4 82.2767 3.53241   2
 -18   2   3 12.3290 1.22774  -1
 -18   2   3 12.3290 1.22774   2
 -16   2   3 124.823 3.27711  -1
 -16   2   2 124.823 3.27711   2
 -14   2   3 65.0021 2.99204  -1
 -14   2   2 65.0021 2.99204   2
 -12   2   3 309.254 3.33161  -1
 -12   2   1 309.254 3.33161   2
 -10   2   3 111.704 4.47452  -1
  10   2   0 111.704 4.47452   2
  -8   2   3 91.3251 3.95549  -1
   8   2   0 91.3251 3.95549   2
  -6   2   3 1166.48 12.7770  -1
   6   2   1 1166.48 12.7770   2
  -4   2   3 109.250 3.99014  -1
   4   2   2 109.250 3.99014   2
  -2   2   3 213.776 10.0341  -1
   2   2   2 213.776 10.0341   2
   0   2   3 89.3402 1.41340  -1
   0   2   3 89.3402 1.41340   2
   2   2   3 469.565 19.5602  -1
  -2   2   4 469.565 19.5602   2
   4   2   3 249.652 6.19606  -1
  -4   2   4 249.652 6.19606   2
   6   2   3 714.247 8.58587  -1
  -6   2   5 714.247 8.58587   2
   8   2   3 453.943 11.1846  -1
  -8   2   6 453.943 11.1846   2
  10   2   3 115.956 3.63195  -1
 -10   2   6 115.956 3.63195   2
  12   2   3 9.57686 0.95314  -1
 -12   2   7 9.57686 0.95314   2
  14   2   3 211.153 3.95515  -1
 -14   2   8 211.153 3.95515   2
  16   2   3 143.528 3.16833  -1
 -16   2   8 143.528 3.16833   2
  18   2   3 409.467 5.13134  -1
 -18   2   9 409.467 5.13134   2
  20   2   3 217.210 4.84260  -1
 -20   2  10 217.210 4.84260   2
  22   2   3 75.7913 5.20302  -1
 -22   2  10 75.7913 5.20302   2
  24   2   3 228.599 5.98524  -1
 -24   2  11 228.599 5.98524   2
  26   2   3 79.4160 4.66350  -1
 -26   2  12 79.4160 4.66350   2
  28   2   3 67.3817 6.16627  -1
 -28   2  12 67.3817 6.16627   2
  30   2   3 35.6849 4.23713  -1
 -30   2  13 35.6849 4.23713   2
  32   2   3 9.65816 9.40522  -1
 -32   2  14 9.65816 9.40522   2
  34   2   3 1.25303 14.6628  -1
 -34   2  14 1.25303 14.6628   2
 -35   3   3 0.22968 12.9070  -1
 -35   3   9 0.22968 12.9070   2
 -33   3   3 -0.5195 4.61859  -1
 -33   3   8 -0.5195 4.61859   2
 -31   3   3 5.35705 6.92330  -1
 -31   3   7 5.35705 6.92330   2
 -29   3   3 57.6988 4.42843  -1
 -29   3   7 57.6988 4.42843   2
 -27   3   3 95.6940 3.70583  -1
 -27   3   6 95.6940 3.70583   2
 -25   3   3 58.9127 3.80259  -1
 -25   3   5 58.9127 3.80259   2
 -23   3   3 133.600 4.34161  -1
 -23   3   5 133.600 4.34161   2
 -21   3   3 52.7316 2.12819  -1
 -21   3   4 52.7316 2.12819   2
 -19   3   3 1.70341 2.98718  -1
 -19   3   3 1.70341 2.98718   2
 -17   3   3 108.593 4.15375  -1
 -17   3   3 108.593 4.15375   2
 -15   3   3 260.728 3.16533  -1
 -15   3   2 260.728 3.16533   2
 -13   3   3 392.051 8.56617  -1
 -13   3   1 392.051 8.56617   2
 -11   3   3 826.093 16.3597  -1
 -11   3   1 826.093 16.3597   2
  -9   3   3 1178.86 11.4003  -1
   9   3   0 1178.86 11.4003   2
  -7   3   3 733.032 16.7168  -1
   7   3   1 733.032 16.7168   2
  -5   3   3 415.990 11.6356  -1
   5   3   1 415.990 11.6356   2
  -3   3   3 137.971 2.21211  -1
   3   3   2 137.971 2.21211   2
  -1   3   3 62.9073 5.50303  -1
   1   3   3 62.9073 5.50303   2
   1   3   3 56.7020 4.95596  -1
  -1   3   3 56.7020 4.95596   2
   3   3   3 518.053 6.01243  -1
  -3   3   4 518.053 6.01243   2
   5   3   3 461.611 9.40978  -1
  -5   3   5 461.611 9.40978   2
   7   3   3 297.749 9.97233  -1
  -7   3   5 297.749 9.97233   2
   9   3   3 1007.25 10.4149  -1
  -9   3   6 1007.25 10.4149   2
  11   3   3 7.52910 2.27656  -1
 -11   3   7 7.52910 2.27656   2
  13   3   3 48.2897 2.36933  -1
 -13   3   7 48.2897 2.36933   2
  15   3   3 90.8949 1.98682  -1
 -15   3   8 90.8949 1.98682   2
  17   3   3 211.347 4.09881  -1
 -17   3   9 211.347 4.09881   2
  19   3   3 140.980 3.57770  -1
 -19   3   9 140.980 3.57770   2
  21   3   3 87.0961 3.20867  -1
 -21   3  10 87.0961 3.20867   2
  23   3   3 270.392 6.93437  -1
 -23   3  11 270.392 6.93437   2
  25   3   3 120.496 4.98382  -1
 -25   3  11 120.496 4.98382   2
  27   3   3 46.1721 3.28960  -1
 -27   3  12 46.1721 3.28960   2
  29   3   3 59.9185 5.76921  -1
 -29   3  13 59.9185 5.76921   2
  31   3   3 27.4145 8.08643  -1
 -31   3  13 27.4145 8.08643   2
  33   3   3 -4.0674 5.27243  -1
 -33   3  14 -4.0674 5.27243   2
  35   3   3 -7.0266 15.3612  -1
 -35   3  15 -7.0266 15.3612   2
 -34   4   3 -1.0722 13.9131  -1
 -34   4   8 -1.0722 13.9131   2
 -32   4   3 7.49575 9.02355  -1
 -32   4   8 7.49575 9.02355   2
 -30   4   3 6.80503 5.66654  -1
 -30   4   7 6.80503 5.66654   2
 -28   4   3 70.2447 4.19262  -1
 -28   4   6 70.2447 4.19262   2
 -26   4   3 110.759 4.93120  -1
 -26   4   6 110.759 4.93120   2
 -24   4   3 74.9180 3.64073  -1
 -24   4   5 74.9180 3.64073   2
 -22   4   3 24.4166 3.78506  -1
 -22   4   4 24.4166 3.78506   2
 -20   4   3 15.3599 3.28135  -1
 -20   4   4 15.3599 3.28135   2
 -18   4   3 60.4783 2.17115  -1
 -18   4   3 60.4783 2.17115   2
 -16   4   3 97.1580 3.16292  -1
 -16   4   2 97.1580 3.16292   2
 -14   4   3 182.628 5.30367  -1
 -14   4   2 182.628 5.30367   2
 -12   4   3 231.125 2.83683  -1
 -12   4   1 231.125 2.83683   2
 -10   4   3 614.762 12.1475  -1
  10   4   0 614.762 12.1475   2
  -8   4   3 951.706 37.3774  -1
   8   4   0 951.706 37.3774   2
  -6   4   3 482.573 5.32111  -1
   6   4   1 482.573 5.32111   2
  -4   4   3 179.450 5.58266  -1
   4   4   2 179.450 5.58266   2
  -2   4   3 587.747 25.4002  -1
   2   4   2 587.747 25.4002   2
   0   4   3 434.104 5.05532  -1
   0   4   3 434.104 5.05532   2
   2   4   3 752.609 21.5423  -1
  -2   4   4 752.609 21.5423   2
   4   4   3 246.085 8.54011  -1
  -4   4   4 246.085 8.54011   2
   6   4   3 828.835 7.56364  -1
  -6   4   5 828.835 7.56364   2
   8   4   3 876.690 14.0716  -1
  -8   4   6 876.690 14.0716   2
  10   4   3 626.946 11.4510  -1
 -10   4   6 626.946 11.4510   2
  12   4   3 140.387 2.32650  -1
 -12   4   7 140.387 2.32650   2
  14   4   3 85.8199 3.70574  -1
 -14   4   8 85.8199 3.70574   2
  16   4   3 58.0143 2.98383  -1
 -16   4   8 58.0143 2.98383   2
  18   4   3 292.381 4.52078  -1
 -18   4   9 292.381 4.52078   2
  20   4   3 43.6545 3.87102  -1
 -20   4  10 43.6545 3.87102   2
  22   4   3 24.8452 4.11787  -1
 -22   4  10 24.8452 4.11787   2
  24   4   3 60.1762 2.66649  -1
 -24   4  11 60.1762 2.66649   2
  26   4   3 18.2081 3.90838  -1
 -26   4  12 18.2081 3.90838   2
  28   4   3 16.2450 5.95066  -1
 -28   4  12 16.2450 5.95066   2
  30   4   3 23.1914 4.76438  -1
 -30   4  13 23.1914 4.76438   2
  32   4   3 3.58806 8.94989  -1
 -32   4  14 3.58806 8.94989   2
  34   4   3 1.27050 14.2476  -1
 -34   4  14 1.27050 14.2476   2
 -33   5   3 -1.0402 7.29336  -1
 -33   5   8 -1.0402 7.29336   2
 -31   5   3 24.7767 9.46317  -1
 -31   5   7 24.7767 9.46317   2
 -29   5   3 23.8294 9.46091  -1
 -29   5   7 23.8294 9.46091   2
 -27   5   3 39.3174 4.19488  -1
 -27   5   6 39.3174 4.19488   2
 -25   5   3 115.731 5.28930  -1
 -25   5   5 115.731 5.28930   2
 -23   5   3 76.8827 5.35508  -1
 -23   5   5 76.8827 5.35508   2
 -21   5   3 4.82336 2.40697  -1
 -21   5   4 4.82336 2.40697   2
 -19   5   3 46.3080 3.72138  -1
 -19   5   3 46.3080 3.72138   2
 -17   5   3 8.50000 2.68108  -1
 -17   5   3 8.50000 2.68108   2
 -15   5   3 71.8972 1.82764  -1
 -15   5   2 71.8972 1.82764   2
 -13   5   3 133.358 3.46515  -1
 -13   5   1 133.358 3.46515   2
 -11   5   3 236.484 5.41612  -1
 -11   5   1 236.484 5.41612   2
  -9   5   3 164.620 2.06094  -1
   9   5   0 164.620 2.06094   2
  -7   5   3 224.333 5.53324  -1
   7   5   1 224.333 5.53324   2
  -5   5   3 180.071 4.31654  -1
   5   5   1 180.071 4.31654   2
  -3   5   3 112.035 1.72757  -1
   3   5   2 112.035 1.72757   2
  -1   5   3 602.560 14.9632  -1
   1   5   3 602.560 14.9632   2
   1   5   3 574.700 12.3446  -1
  -1   5   3 574.700 12.3446   2
   3   5   3 585.095 5.75392  -1
  -3   5   4 585.095 5.75392   2
   5   5   3 844.614 13.8182  -1
  -5   5   5 844.614 13.8182   2
   7   5   3 858.484 11.6225  -1
  -7   5   5 858.484 11.6225   2
   9   5   3 741.446 7.13490  -1
  -9   5   6 741.446 7.13490   2
  11   5   3 563.911 8.68922  -1
 -11   5   7 563.911 8.68922   2
  13   5   3 282.396 5.63057  -1
 -13   5   7 282.396 5.63057   2
  15   5   3 318.288 4.48188  -1
 -15   5   8 318.288 4.48188   2
  17   5   3 59.8008 3.10037  -1
 -17   5   9 59.8008 3.10037   2
  19   5   3 29.3081 3.51984  -1
 -19   5   9 29.3081 3.51984   2
  21   5   3 21.4371 2.90983  -1
 -21   5  10 21.4371 2.90983   2
  23   5   3 20.3770 5.41412  -1
 -23   5  11 20.3770 5.41412   2
  25   5   3 -9.0329 5.91789  -1
 -25   5  11 -9.0329 5.91789   2
  27   5   3 -2.8533 5.10646  -1
 -27   5  12 -2.8533 5.10646   2
  29   5   3 20.6272 8.39977  -1
 -29   5  13 20.6272 8.39977   2
  31   5   3 8.81058 11.0648  -1
 -31   5  13 8.81058 11.0648   2
  33   5   3 -6.0867 10.5089  -1
 -33   5  14 -6.0867 10.5089   2
 -30   6   3 7.10305 5.69276  -1
 -30   6   7 7.10305 5.69276   2
 -28   6   3 13.3963 10.0320  -1
 -28   6   6 13.3963 10.0320   2
 -26   6   3 58.6790 6.03604  -1
 -26   6   6 58.6790 6.03604   2
 -24   6   3 32.2642 3.51387  -1
 -24   6   5 32.2642 3.51387   2
 -22   6   3 8.13993 4.11253  -1
 -22   6   4 8.13993 4.11253   2
 -20   6   3 19.1827 4.10099  -1
 -20   6   4 19.1827 4.10099   2
 -18   6   3 20.1906 2.70909  -1
 -18   6   3 20.1906 2.70909   2
 -16   6   3 16.1061 2.52573  -1
 -16   6   2 16.1061 2.52573   2
 -14   6   3 33.3646 2.96314  -1
 -14   6   2 33.3646 2.96314   2
 -12   6   3 206.791 2.90946  -1
 -12   6   1 206.791 2.90946   2
 -10   6   3 102.813 2.93839  -1
  10   6   0 102.813 2.93839   2
  -8   6   3 127.818 4.15548  -1
   8   6   0 127.818 4.15548   2
  -6   6   3 186.875 2.19227  -1
   6   6   1 186.875 2.19227   2
  -4   6   3 108.208 3.84970  -1
   4   6   2 108.208 3.84970   2
  -2   6   3 18.5716 2.22651  -1
   2   6   2 18.5716 2.22651   2
   0   6   3 323.336 3.21610  -1
   0   6   3 323.336 3.21610   2
   2   6   3 120.454 3.00753  -1
  -2   6   4 120.454 3.00753   2
   4   6   3 145.636 3.40765  -1
  -4   6   4 145.636 3.40765   2
   6   6   3 369.709 3.58229  -1
  -6   6   5 369.709 3.58229   2
   8   6   3 70.1043 2.60322  -1
  -8   6   6 70.1043 2.60322   2
  10   6   3 294.786 5.63652  -1
 -10   6   6 294.786 5.63652   2
  12   6   3 219.979 3.21576  -1
 -12   6   7 219.979 3.21576   2
  14   6   3 32.9195 2.73310  -1
 -14   6   8 32.9195 2.73310   2
  16   6   3 16.7920 2.58589  -1
 -16   6   8 16.7920 2.58589   2
  18   6   3 21.3368 2.55905  -1
 -18   6   9 21.3368 2.55905   2
  20   6   3 57.5266 4.86350  -1
 -20   6  10 57.5266 4.86350   2
  22   6   3 44.7757 4.51313  -1
 -22   6  10 44.7757 4.51313   2
  24   6   3 33.4847 3.74499  -1
 -24   6  11 33.4847 3.74499   2
  26   6   3 31.8604 8.43093  -1
 -26   6  12 31.8604 8.43093   2
  28   6   3 24.5495 9.65172  -1
 -28   6  12 24.5495 9.65172   2
  30   6   3 12.1676 6.24385  -1
 -30   6  13 12.1676 6.24385   2
  32   6   3 4.73963 13.9063  -1
 -32   6  14 4.73963 13.9063   2
 -33   7   3 6.84706 10.9584  -1
 -33   7   8 6.84706 10.9584   2
 -29   7   3 6.74223 9.22948  -1
 -29   7   7 6.74223 9.22948   2
 -27   7   3 52.0276 5.41699  -1
 -27   7   6 52.0276 5.41699   2
 -25   7   3 -6.5648 5.59583  -1
 -25   7   5 -6.5648 5.59583   2
 -23   7   3 0.47635 5.12231  -1
 -23   7   5 0.47635 5.12231   2
 -21   7   3 24.1162 3.28347  -1
 -21   7   4 24.1162 3.28347   2
 -19   7   3 3.13913 3.90396  -1
 -19   7   3 3.13913 3.90396   2
 -17   7   3 16.8349 3.32735  -1
 -17   7   3 16.8349 3.32735   2
 -15   7   3 38.1164 1.84859  -1
 -15   7   2 38.1164 1.84859   2
 -13   7   3 38.9216 2.63439  -1
 -13   7   1 38.9216 2.63439   2
 -11   7   3 77.7746 2.80689  -1
 -11   7   1 77.7746 2.80689   2
  -9   7   3 468.097 5.11487  -1
   9   7   0 468.097 5.11487   2
  -7   7   3 29.1912 2.46265  -1
   7   7   1 29.1912 2.46265   2
  -5   7   3 50.5496 2.30646  -1
   5   7   1 50.5496 2.30646   2
  -3   7   3 211.040 2.53403  -1
   3   7   2 211.040 2.53403   2
  -1   7   3 6.26805 2.35873  -1
   1   7   3 6.26805 2.35873   2
   1   7   3 2.42088 1.88406  -1
  -1   7   3 2.42088 1.88406   2
   3   7   3 14.5698 0.94746  -1
  -3   7   4 14.5698 0.94746   2
   5   7   3 1.10956 2.00190  -1
  -5   7   5 1.10956 2.00190   2
   7   7   3 10.5631 1.85910  -1
  -7   7   5 10.5631 1.85910   2
   9   7   3 2.92262 1.14242  -1
  -9   7   6 2.92262 1.14242   2
  11   7   3 21.7975 2.38305  -1
 -11   7   7 21.7975 2.38305   2
  13   7   3 18.2773 2.30826  -1
 -13   7   7 18.2773 2.30826   2
  15   7   3 80.6899 2.71668  -1
 -15   7   8 80.6899 2.71668   2
  17   7   3 3.27800 3.24902  -1
 -17   7   9 3.27800 3.24902   2
  19   7   3 5.09923 3.39812  -1
 -19   7   9 5.09923 3.39812   2
  21   7   3 115.782 4.63700  -1
 -21   7  10 115.782 4.63700   2
  23   7   3 3.84758 6.04559  -1
 -23   7  11 3.84758 6.04559   2
  25   7   3 9.21711 5.39543  -1
 -25   7  11 9.21711 5.39543   2
  27   7   3 91.0939 6.31933  -1
 -27   7  12 91.0939 6.31933   2
  29   7   3 11.0735 9.12943  -1
 -29   7  13 11.0735 9.12943   2
  31   7   3 4.63586 14.5682  -1
 -31   7  13 4.63586 14.5682   2
 -30   8   3 -5.5622 6.52886  -1
 -30   8   7 -5.5622 6.52886   2
 -28   8   3 54.6635 16.6629  -1
 -28   8   6 54.6635 16.6629   2
 -26   8   3 34.0333 8.07387  -1
 -26   8   6 34.0333 8.07387   2
 -24   8   3 18.8422 3.76975  -1
 -24   8   5 18.8422 3.76975   2
 -22   8   3 12.5960 4.93062  -1
 -22   8   4 12.5960 4.93062   2
 -20   8   3 14.4696 4.72720  -1
 -20   8   4 14.4696 4.72720   2
 -18   8   3 -2.0173 2.20588  -1
 -18   8   3 -2.0173 2.20588   2
 -16   8   3 47.3495 3.44404  -1
 -16   8   2 47.3495 3.44404   2
 -14   8   3 55.9772 2.64851  -1
 -14   8   2 55.9772 2.64851   2
 -12   8   3 111.082 2.29100  -1
 -12   8   1 111.082 2.29100   2
 -10   8   3 138.714 3.34147  -1
  10   8   0 138.714 3.34147   2
  -8   8   3 202.716 3.93778  -1
   8   8   0 202.716 3.93778   2
  -6   8   3 111.340 1.98815  -1
   6   8   1 111.340 1.98815   2
  -4   8   3 263.882 3.82246  -1
   4   8   2 263.882 3.82246   2
  -2   8   3 182.909 3.34979  -1
   2   8   2 182.909 3.34979   2
   0   8   3 3.23855 0.92268  -1
   0   8   3 3.23855 0.92268   2
   2   8   3 34.4760 2.04354  -1
  -2   8   4 34.4760 2.04354   2
   4   8   3 32.4166 2.26014  -1
  -4   8   4 32.4166 2.26014   2
   6   8   3 168.501 2.78419  -1
  -6   8   5 168.501 2.78419   2
   8   8   3 66.3540 2.53524  -1
  -8   8   6 66.3540 2.53524   2
  10   8   3 130.825 3.21730  -1
 -10   8   6 130.825 3.21730   2
  12   8   3 120.137 2.49847  -1
 -12   8   7 120.137 2.49847   2
  14   8   3 80.3599 2.82288  -1
 -14   8   8 80.3599 2.82288   2
  16   8   3 15.9025 3.30366  -1
 -16   8   8 15.9025 3.30366   2
  18   8   3 2.28828 2.25792  -1
 -18   8   9 2.28828 2.25792   2
  20   8   3 115.628 5.59612  -1
 -20   8  10 115.628 5.59612   2
  22   8   3 66.6488 5.41332  -1
 -22   8  10 66.6488 5.41332   2
  24   8   3 1.81631 4.24226  -1
 -24   8  11 1.81631 4.24226   2
  26   8   3 107.553 11.4228  -1
 -26   8  12 107.553 11.4228   2
  28   8   3 29.4676 9.33706  -1
 -28   8  12 29.4676 9.33706   2
  30   8   3 24.0141 11.8667  -1
 -30   8  13 24.0141 11.8667   2
 -27   9   3 35.3913 6.06485  -1
 -27   9   6 35.3913 6.06485   2
 -25   9   3 13.3482 11.0235  -1
 -25   9   5 13.3482 11.0235   2
 -23   9   3 -12.290 5.82380  -1
 -23   9   5 -12.290 5.82380   2
 -21   9   3 0.65083 3.92125  -1
 -21   9   4 0.65083 3.92125   2
 -19   9   3 -3.0806 3.58124  -1
 -19   9   3 -3.0806 3.58124   2
 -17   9   3 0.35987 3.53629  -1
 -17   9   3 0.35987 3.53629   2
 -15   9   3 24.2505 1.74531  -1
 -15   9   2 24.2505 1.74531   2
 -13   9   3 202.267 3.83845  -1
 -13   9   1 202.267 3.83845   2
 -11   9   3 189.762 3.98901  -1
 -11   9   1 189.762 3.98901   2
  -9   9   3 216.045 3.66774  -1
   9   9   0 216.045 3.66774   2
  -7   9   3 236.940 4.66215  -1
   7   9   1 236.940 4.66215   2
  -5   9   3 286.920 4.33018  -1
   5   9   1 286.920 4.33018   2
  -3   9   3 48.8561 1.53451  -1
   3   9   2 48.8561 1.53451   2
  -1   9   3 37.2617 2.24465  -1
   1   9   3 37.2617 2.24465   2
   1   9   3 40.4136 2.14418  -1
  -1   9   3 40.4136 2.14418   2
   3   9   3 56.1027 1.65870  -1
  -3   9   4 56.1027 1.65870   2
   5   9   3 223.450 4.18996  -1
  -5   9   5 223.450 4.18996   2
   7   9   3 492.905 6.58602  -1
  -7   9   5 492.905 6.58602   2
   9   9   3 46.1099 2.17415  -1
  -9   9   6 46.1099 2.17415   2
  11   9   3 169.657 4.05166  -1
 -11   9   7 169.657 4.05166   2
  13   9   3 77.6105 3.35349  -1
 -13   9   7 77.6105 3.35349   2
  15   9   3 20.2620 1.89983  -1
 -15   9   8 20.2620 1.89983   2
  17   9   3 -2.4434 3.77240  -1
 -17   9   9 -2.4434 3.77240   2
  19   9   3 20.8329 5.11338  -1
 -19   9   9 20.8329 5.11338   2
  21   9   3 37.8566 3.51598  -1
 -21   9  10 37.8566 3.51598   2
  23   9   3 10.6366 7.98670  -1
 -23   9  11 10.6366 7.98670   2
  25   9   3 12.3182 8.18976  -1
 -25   9  11 12.3182 8.18976   2
  27   9   3 -7.8066 5.67844  -1
 -27   9  12 -7.8066 5.67844   2
 -24  10   3 8.42197 5.15999  -1
 -24  10   5 8.42197 5.15999   2
 -22  10   3 9.81045 7.09876  -1
 -22  10   4 9.81045 7.09876   2
 -20  10   3 6.32910 5.62229  -1
 -20  10   4 6.32910 5.62229   2
 -18  10   3 0.40495 2.65509  -1
 -18  10   3 0.40495 2.65509   2
 -16  10   3 8.12369 2.89529  -1
 -16  10   2 8.12369 2.89529   2
 -14  10   3 42.5203 3.06262  -1
 -14  10   2 42.5203 3.06262   2
 -12  10   3 145.705 3.25432  -1
 -12  10   1 145.705 3.25432   2
 -10  10   3 183.421 4.14265  -1
  10  10   0 183.421 4.14265   2
  -8  10   3 153.109 4.04440  -1
   8  10   0 153.109 4.04440   2
  -6  10   3 100.292 2.40546  -1
   6  10   1 100.292 2.40546   2
  -4  10   3 32.6868 2.55143  -1
   4  10   2 32.6868 2.55143   2
  -2  10   3 59.1931 2.68292  -1
   2  10   2 59.1931 2.68292   2
   0  10   3 184.034 3.00462  -1
   0  10   3 184.034 3.00462   2
   2  10   3 135.915 3.28854  -1
  -2  10   4 135.915 3.28854   2
   4  10   3 84.1059 2.69185  -1
  -4  10   4 84.1059 2.69185   2
   6  10   3 250.529 4.12231  -1
  -6  10   5 250.529 4.12231   2
   8  10   3 119.375 3.62728  -1
  -8  10   6 119.375 3.62728   2
  10  10   3 104.356 3.75086  -1
 -10  10   6 104.356 3.75086   2
  12  10   3 135.698 3.50591  -1
 -12  10   7 135.698 3.50591   2
  14  10   3 4.10353 3.08590  -1
 -14  10   8 4.10353 3.08590   2
  16  10   3 5.84772 2.94174  -1
 -16  10   8 5.84772 2.94174   2
  18  10   3 29.3702 3.49719  -1
 -18  10   9 29.3702 3.49719   2
  20  10   3 23.2922 6.80799  -1
 -20  10  10 23.2922 6.80799   2
  22  10   3 18.7826 6.73524  -1
 -22  10  10 18.7826 6.73524   2
  24  10   3 12.1661 5.15830  -1
 -24  10  11 12.1661 5.15830   2
 -27  11   3 31.9133 12.6642  -1
 -27  11   6 31.9133 12.6642   2
 -23  11   3 21.5579 14.3205  -1
 -23  11   5 21.5579 14.3205   2
 -21  11   3 19.4214 6.10202  -1
 -21  11   4 19.4214 6.10202   2
 -19  11   3 2.32131 7.47257  -1
 -19  11   3 2.32131 7.47257   2
 -17  11   3 1.72983 3.92670  -1
 -17  11   3 1.72983 3.92670   2
 -15  11   3 49.1981 2.87653  -1
 -15  11   2 49.1981 2.87653   2
 -13  11   3 94.8837 3.95873  -1
 -13  11   1 94.8837 3.95873   2
 -11  11   3 89.3907 4.12129  -1
 -11  11   1 89.3907 4.12129   2
  -9  11   3 119.564 3.38743  -1
   9  11   0 119.564 3.38743   2
  -7  11   3 157.715 4.29385  -1
   7  11   1 157.715 4.29385   2
  -5  11   3 70.5044 3.26325  -1
   5  11   1 70.5044 3.26325   2
  -3  11   3 6.48526 1.74576  -1
   3  11   2 6.48526 1.74576   2
  -1  11   3 120.285 3.58470  -1
   1  11   3 120.285 3.58470   2
   1  11   3 114.681 3.31989  -1
  -1  11   3 114.681 3.31989   2
   3  11   3 137.982 3.03783  -1
  -3  11   4 137.982 3.03783   2
   5  11   3 194.980 4.44431  -1
  -5  11   5 194.980 4.44431   2
   7  11   3 108.304 3.77858  -1
  -7  11   5 108.304 3.77858   2
   9  11   3 129.810 3.55427  -1
  -9  11   6 129.810 3.55427   2
  11  11   3 68.7760 3.81578  -1
 -11  11   7 68.7760 3.81578   2
  13  11   3 16.9904 3.74640  -1
 -13  11   7 16.9904 3.74640   2
  15  11   3 1.30021 2.55693  -1
 -15  11   8 1.30021 2.55693   2
  17  11   3 77.0839 4.66288  -1
 -17  11   9 77.0839 4.66288   2
  19  11   3 40.6546 6.44796  -1
 -19  11   9 40.6546 6.44796   2
  21  11   3 21.3787 3.96872  -1
 -21  11  10 21.3787 3.96872   2
  23  11   3 43.2144 14.2175  -1
 -23  11  11 43.2144 14.2175   2
  25  11   3 27.4260 13.9906  -1
 -25  11  11 27.4260 13.9906   2
 -20  12   3 0.65429 13.2095  -1
 -20  12   4 0.65429 13.2095   2
 -18  12   3 13.3142 3.77427  -1
 -18  12   3 13.3142 3.77427   2
 -16  12   3 9.82537 5.75806  -1
 -16  12   2 9.82537 5.75806   2
 -14  12   3 23.0494 4.32500  -1
 -14  12   2 23.0494 4.32500   2
 -12  12   3 41.5592 2.94348  -1
 -12  12   1 41.5592 2.94348   2
 -10  12   3 34.7743 3.78904  -1
  10  12   0 34.7743 3.78904   2
  -8  12   3 13.2030 3.99602  -1
   8  12   0 13.2030 3.99602   2
  -6  12   3 66.2566 2.96104  -1
   6  12   1 66.2566 2.96104   2
  -4  12   3 13.8379 2.98924  -1
   4  12   2 13.8379 2.98924   2
  -2  12   3 18.8728 2.95984  -1
   2  12   2 18.8728 2.95984   2
   0  12   3 -0.0964 1.79614  -1
   0  12   3 -0.0964 1.79614   2
   2  12   3 26.6887 3.21131  -1
  -2  12   4 26.6887 3.21131   2
   4  12   3 54.2234 3.13864  -1
  -4  12   4 54.2234 3.13864   2
   6  12   3 36.3421 2.53186  -1
  -6  12   5 36.3421 2.53186   2
   8  12   3 26.7400 4.17266  -1
  -8  12   6 26.7400 4.17266   2
  10  12   3 24.3243 3.89470  -1
 -10  12   6 24.3243 3.89470   2
  12  12   3 4.14596 2.52444  -1
 -12  12   7 4.14596 2.52444   2
  14  12   3 11.6885 4.49964  -1
 -14  12   8 11.6885 4.49964   2
  16  12   3 19.5483 5.85453  -1
 -16  12   8 19.5483 5.85453   2
  18  12   3 29.7022 4.16206  -1
 -18  12   9 29.7022 4.16206   2
  20  12   3 38.8345 13.4970  -1
 -20  12  10 38.8345 13.4970   2
  22  12   3 64.4674 14.7029  -1
 -22  12  10 64.4674 14.7029   2
  24  12   3 44.1992 8.43036  -1
 -24  12  11 44.1992 8.43036   2
 -17  13   3 19.6885 9.43195  -1
 -17  13   3 19.6885 9.43195   2
 -15  13   3 12.1103 3.31678  -1
 -15  13   2 12.1103 3.31678   2
 -13  13   3 42.7192 6.50166  -1
 -13  13   1 42.7192 6.50166   2
 -11  13   3 55.5127 5.15580  -1
 -11  13   1 55.5127 5.15580   2
  -9  13   3 39.5389 3.23903  -1
   9  13   0 39.5389 3.23903   2
  -7  13   3 40.9741 4.41307  -1
   7  13   1 40.9741 4.41307   2
  -5  13   3 17.9915 4.58017  -1
   5  13   1 17.9915 4.58017   2
  -3  13   3 20.0172 2.22248  -1
   3  13   2 20.0172 2.22248   2
  -1  13   3 17.5522 3.60422  -1
   1  13   3 17.5522 3.60422   2
   1  13   3 22.1877 3.58347  -1
  -1  13   3 22.1877 3.58347   2
   3  13   3 35.6607 2.41983  -1
  -3  13   4 35.6607 2.41983   2
   5  13   3 26.0925 3.97784  -1
  -5  13   5 26.0925 3.97784   2
   7  13   3 47.2101 4.33340  -1
  -7  13   5 47.2101 4.33340   2
   9  13   3 68.5810 3.58479  -1
  -9  13   6 68.5810 3.58479   2
  11  13   3 6.84140 5.42044  -1
 -11  13   7 6.84140 5.42044   2
  13  13   3 18.4344 7.47107  -1
 -13  13   7 18.4344 7.47107   2
  15  13   3 27.0759 3.73192  -1
 -15  13   8 27.0759 3.73192   2
  17  13   3 11.3149 13.0791  -1
 -17  13   9 11.3149 13.0791   2
  19  13   3 32.4849 14.0261  -1
 -19  13   9 32.4849 14.0261   2
  21  13   3 20.0219 8.69746  -1
 -21  13  10 20.0219 8.69746   2
 -16  14   3 1.33372 12.2347  -1
 -16  14   2 1.33372 12.2347   2
 -14  14   3 8.26915 7.81094  -1
 -14  14   2 8.26915 7.81094   2
 -12  14   3 6.95341 3.75956  -1
 -12  14   1 6.95341 3.75956   2
 -10  14   3 11.8612 6.17428  -1
  10  14   0 11.8612 6.17428   2
  -8  14   3 25.1851 5.49075  -1
   8  14   0 25.1851 5.49075   2
  -6  14   3 2.96429 2.90930  -1
   6  14   1 2.96429 2.90930   2
  -4  14   3 27.2570 5.40677  -1
   4  14   2 27.2570 5.40677   2
  -2  14   3 21.0265 4.85855  -1
   2  14   2 21.0265 4.85855   2
   0  14   3 4.35617 2.58708  -1
   0  14   3 4.35617 2.58708   2
   2  14   3 124.285 5.77398  -1
  -2  14   4 124.285 5.77398   2
   4  14   3 53.1017 5.52428  -1
  -4  14   4 53.1017 5.52428   2
   6  14   3 4.02111 2.93467  -1
  -6  14   5 4.02111 2.93467   2
   8  14   3 132.259 6.66175  -1
  -8  14   6 132.259 6.66175   2
  10  14   3 82.0483 6.70931  -1
 -10  14   6 82.0483 6.70931   2
  12  14   3 -0.2085 4.11869  -1
 -12  14   7 -0.2085 4.11869   2
  14  14   3 65.6902 14.6124  -1
 -14  14   8 65.6902 14.6124   2
  16  14   3 32.0288 13.9739  -1
 -16  14   8 32.0288 13.9739   2
  18  14   3 7.68947 8.32758  -1
 -18  14   9 7.68947 8.32758   2
 -15  15   3 7.02279 6.13703  -1
 -15  15   2 7.02279 6.13703   2
 -13  15   3 8.27871 10.0562  -1
 -13  15   1 8.27871 10.0562   2
 -11  15   3 7.02592 7.97432  -1
 -11  15   1 7.02592 7.97432   2
  -9  15   3 14.3852 4.62137  -1
   9  15   0 14.3852 4.62137   2
  -7  15   3 16.0216 7.51135  -1
   7  15   1 16.0216 7.51135   2
  -5  15   3 15.5187 6.26255  -1
   5  15   1 15.5187 6.26255   2
  -3  15   3 -0.7006 3.11801  -1
   3  15   2 -0.7006 3.11801   2
  -1  15   3 26.5131 6.05038  -1
   1  15   3 26.5131 6.05038   2
   1  15   3 20.3536 5.32436  -1
  -1  15   3 20.3536 5.32436   2
   3  15   3 43.1387 3.69696  -1
  -3  15   4 43.1387 3.69696   2
   5  15   3 9.14070 6.70609  -1
  -5  15   5 9.14070 6.70609   2
   7  15   3 19.1939 8.33675  -1
  -7  15   5 19.1939 8.33675   2
   9  15   3 43.6769 5.37615  -1
  -9  15   6 43.6769 5.37615   2
  11  15   3 19.9776 13.9172  -1
 -11  15   7 19.9776 13.9172   2
  13  15   3 4.69134 13.8748  -1
 -13  15   7 4.69134 13.8748   2
  -8  16   3 6.29541 14.1928  -1
   8  16   0 6.29541 14.1928   2
  -6  16   3 46.7930 7.98956  -1
   6  16   1 46.7930 7.98956   2
  -4  16   3 -3.4717 10.2509  -1
   4  16   2 -3.4717 10.2509   2
  -2  16   3 19.6511 10.6408  -1
   2  16   2 19.6511 10.6408   2
   0  16   3 2.12713 6.24943  -1
   0  16   3 2.12713 6.24943   2
   2  16   3 20.5235 10.2636  -1
  -2  16   4 20.5235 10.2636   2
   4  16   3 7.22139 10.1499  -1
  -4  16   4 7.22139 10.1499   2
   6  16   3 3.36338 6.57662  -1
  -6  16   5 3.36338 6.57662   2
 -30   0   4 56.8620 10.0917  -1
 -30   0   6 56.8620 10.0917   2
 -28   0   4 40.8391 6.51092  -1
 -28   0   5 40.8391 6.51092   2
 -26   0   4 129.742 7.46300  -1
 -26   0   5 129.742 7.46300   2
 -24   0   4 15.8483 2.48302  -1
 -24   0   4 15.8483 2.48302   2
 -22   0   4 8.02374 3.23730  -1
 -22   0   3 8.02374 3.23730   2
 -20   0   4 4.83606 3.06375  -1
 -20   0   3 4.83606 3.06375   2
 -18   0   4 248.720 4.54793  -1
 -18   0   2 248.720 4.54793   2
 -16   0   4 76.7643 3.94427  -1
 -16   0   1 76.7643 3.94427   2
 -14   0   4 243.325 6.37961  -1
 -14   0   1 243.325 6.37961   2
 -12   0   4 245.084 3.67507  -1
  12   0   0 245.084 3.67507   2
 -10   0   4 137.600 5.81931  -1
  10   0   1 137.600 5.81931   2
  -8   0   4 168.982 6.07871  -1
   8   0   1 168.982 6.07871   2
  -6   0   4 2224.21 32.7766  -1
   6   0   2 2224.21 32.7766   2
  -4   0   4 535.638 9.96000   2
  -4   0   4 462.320 17.8952  -1
   4   0   3 462.320 17.8952   2
  -2   0   4 3354.70 121.288  -1
   2   0   3 3354.70 121.288   2
   0   0   4 9999.99 181.704  -1
   0   0   4 9999.99 181.704   2
   2   0   4 29.6563 1.92145  -1
  -2   0   5 29.6563 1.92145   2
   4   0   4 1037.70 26.7080  -1
  -4   0   5 1037.70 26.7080   2
   6   0   4 4406.33 72.5811  -1
  -6   0   6 4406.33 72.5811   2
   8   0   4 183.706 5.90563  -1
  -8   0   7 183.706 5.90563   2
  10   0   4 92.0521 2.85891  -1
 -10   0   7 92.0521 2.85891   2
  12   0   4 218.516 3.14392  -1
 -12   0   8 218.516 3.14392   2
  14   0   4 3.13028 2.02903  -1
 -14   0   9 3.13028 2.02903   2
  16   0   4 13.4538 3.73496  -1
 -16   0   9 13.4538 3.73496   2
  18   0   4 9.00987 1.77504  -1
 -18   0  10 9.00987 1.77504   2
  20   0   4 7.43031 3.16581  -1
 -20   0  11 7.43031 3.16581   2
  22   0   4 14.1131 4.45901  -1
 -22   0  11 14.1131 4.45901   2
  24   0   4 10.0696 2.84381  -1
 -24   0  12 10.0696 2.84381   2
  26   0   4 -8.8340 9.89993  -1
 -26   0  13 -8.8340 9.89993   2
 -33   1   4 5.15986 6.88066  -1
 -33   1   7 5.15986 6.88066   2
 -31   1   4 61.8567 7.20626  -1
 -31   1   6 61.8567 7.20626   2
 -29   1   4 58.7090 6.77833  -1
 -29   1   6 58.7090 6.77833   2
 -27   1   4 81.3887 3.77082  -1
 -27   1   5 81.3887 3.77082   2
 -25   1   4 113.407 4.81536  -1
 -25   1   4 113.407 4.81536   2
 -23   1   4 18.4156 2.67733  -1
 -23   1   4 18.4156 2.67733   2
 -21   1   4 22.4218 1.69921  -1
 -21   1   3 22.4218 1.69921   2
 -19   1   4 17.7768 2.03621  -1
 -19   1   2 17.7768 2.03621   2
 -17   1   4 26.2403 2.06806  -1
 -17   1   2 26.2403 2.06806   2
 -15   1   4 584.799 5.49384  -1
 -15   1   1 584.799 5.49384   2
 -13   1   4 75.9469 2.32056  -1
  13   1   0 75.9469 2.32056   2
 -11   1   4 106.917 3.08376  -1
  11   1   0 106.917 3.08376   2
  -9   1   4 1374.17 13.6429  -1
   9   1   1 1374.17 13.6429   2
  -7   1   4 221.812 4.00298  -1
   7   1   2 221.812 4.00298   2
  -5   1   4 10.1382 1.69612  -1
   5   1   2 10.1382 1.69612   2
  -3   1   4 549.062 6.12300  -1
   3   1   3 549.062 6.12300   2
  -1   1   4 683.136 25.9067  -1
   1   1   4 683.136 25.9067   2
   1   1   4 703.825 26.5854  -1
  -1   1   4 703.825 26.5854   2
   3   1   4 2245.63 28.8062  -1
  -3   1   5 2245.63 28.8062   2
   5   1   4 2526.93 99.4440  -1
  -5   1   6 2526.93 99.4440   2
   7   1   4 1768.61 49.9725  -1
  -7   1   6 1768.61 49.9725   2
   9   1   4 21.5758 0.78353  -1
  -9   1   7 21.5758 0.78353   2
  11   1   4 404.860 5.15655  -1
 -11   1   8 404.860 5.15655   2
  13   1   4 244.922 4.16253  -1
 -13   1   8 244.922 4.16253   2
  15   1   4 296.602 3.35162  -1
 -15   1   9 296.602 3.35162   2
  17   1   4 13.8089 1.84400  -1
 -17   1  10 13.8089 1.84400   2
  19   1   4 70.2360 2.73150  -1
 -19   1  10 70.2360 2.73150   2
  21   1   4 129.084 2.97085  -1
 -21   1  11 129.084 2.97085   2
  23   1   4 8.81402 3.64413  -1
 -23   1  12 8.81402 3.64413   2
  25   1   4 2.82926 4.54989  -1
 -25   1  12 2.82926 4.54989   2
  27   1   4 43.3752 3.56908  -1
 -27   1  13 43.3752 3.56908   2
  29   1   4 47.1157 7.14713  -1
 -29   1  14 47.1157 7.14713   2
 -36   2   4 -4.6523 10.4670  -1
 -36   2   8 -4.6523 10.4670   2
 -34   2   4 -2.3649 13.6405  -1
 -34   2   7 -2.3649 13.6405   2
 -32   2   4 -3.2027 8.49035  -1
 -32   2   7 -3.2027 8.49035   2
 -30   2   4 13.9104 3.26956  -1
 -30   2   6 13.9104 3.26956   2
 -28   2   4 38.1083 4.31621  -1
 -28   2   5 38.1083 4.31621   2
 -26   2   4 70.1428 4.06056  -1
 -26   2   5 70.1428 4.06056   2
 -24   2   4 39.1301 2.70687  -1
 -24   2   4 39.1301 2.70687   2
 -22   2   4 78.8742 3.30744  -1
 -22   2   3 78.8742 3.30744   2
 -20   2   4 86.2549 3.18593  -1
 -20   2   3 86.2549 3.18593   2
 -18   2   4 76.8761 1.75162  -1
 -18   2   2 76.8761 1.75162   2
 -16   2   4 361.211 6.41392  -1
 -16   2   1 361.211 6.41392   2
 -14   2   4 861.831 14.7108  -1
 -14   2   1 861.831 14.7108   2
 -12   2   4 454.259 4.50280  -1
  12   2   0 454.259 4.50280   2
 -10   2   4 291.055 5.47780  -1
  10   2   1 291.055 5.47780   2
  -8   2   4 157.318 4.39089  -1
   8   2   1 157.318 4.39089   2
  -6   2   4 836.564 8.02001  -1
   6   2   2 836.564 8.02001   2
  -4   2   4 254.534 6.23789  -1
   4   2   3 254.534 6.23789   2
  -2   2   4 485.038 20.3445  -1
   2   2   3 485.038 20.3445   2
   0   2   4 2017.32 22.0513  -1
   0   2   4 2017.32 22.0513   2
   2   2   4 838.485 33.7452  -1
  -2   2   5 838.485 33.7452   2
   4   2   4 230.230 5.00897  -1
  -4   2   5 230.230 5.00897   2
   6   2   4 390.411 4.94311  -1
  -6   2   6 390.411 4.94311   2
   8   2   4 225.828 6.40783  -1
  -8   2   7 225.828 6.40783   2
  10   2   4 140.423 3.75233  -1
 -10   2   7 140.423 3.75233   2
  12   2   4 185.898 2.23351  -1
 -12   2   8 185.898 2.23351   2
  14   2   4 262.574 4.83635  -1
 -14   2   9 262.574 4.83635   2
  16   2   4 287.775 4.97777  -1
 -16   2   9 287.775 4.97777   2
  18   2   4 301.481 4.40551  -1
 -18   2  10 301.481 4.40551   2
  20   2   4 386.035 7.67525  -1
 -20   2  11 386.035 7.67525   2
  22   2   4 319.378 9.80733  -1
 -22   2  11 319.378 9.80733   2
  24   2   4 77.8766 3.47057  -1
 -24   2  12 77.8766 3.47057   2
  26   2   4 73.8707 4.57498  -1
 -26   2  13 73.8707 4.57498   2
  28   2   4 69.4821 8.53074  -1
 -28   2  13 69.4821 8.53074   2
  30   2   4 19.2469 4.18589  -1
 -30   2  14 19.2469 4.18589   2
  32   2   4 4.25156 9.47119  -1
 -32   2  15 4.25156 9.47119   2
 -35   3   4 3.68797 14.1672  -1
 -35   3   8 3.68797 14.1672   2
 -33   3   4 -0.9172 4.76685  -1
 -33   3   7 -0.9172 4.76685   2
 -31   3   4 14.2110 13.6575  -1
 -31   3   6 14.2110 13.6575   2
 -29   3   4 23.5588 4.05775  -1
 -29   3   6 23.5588 4.05775   2
 -27   3   4 12.6438 2.73894  -1
 -27   3   5 12.6438 2.73894   2
 -25   3   4 8.97645 3.50465  -1
 -25   3   4 8.97645 3.50465   2
 -23   3   4 5.93807 3.06274  -1
 -23   3   4 5.93807 3.06274   2
 -21   3   4 54.5540 2.04179  -1
 -21   3   3 54.5540 2.04179   2
 -19   3   4 46.9063 3.50578  -1
 -19   3   2 46.9063 3.50578   2
 -17   3   4 79.3364 3.46742  -1
 -17   3   2 79.3364 3.46742   2
 -15   3   4 358.954 4.07226  -1
 -15   3   1 358.954 4.07226   2
 -13   3   4 621.874 10.3554  -1
  13   3   0 621.874 10.3554   2
 -11   3   4 148.637 5.51205  -1
  11   3   0 148.637 5.51205   2
  -9   3   4 710.788 7.17123  -1
   9   3   1 710.788 7.17123   2
  -7   3   4 116.609 4.05075  -1
   7   3   2 116.609 4.05075   2
  -5   3   4 60.6848 2.85515  -1
   5   3   2 60.6848 2.85515   2
  -3   3   4 539.357 6.21159  -1
   3   3   3 539.357 6.21159   2
  -1   3   4 286.397 13.2822  -1
   1   3   4 286.397 13.2822   2
   1   3   4 306.880 13.8255  -1
  -1   3   4 306.880 13.8255   2
   3   3   4 9.76312 0.64445  -1
  -3   3   5 9.76312 0.64445   2
   5   3   4 172.129 3.73426  -1
  -5   3   6 172.129 3.73426   2
   7   3   4 108.876 4.11605  -1
  -7   3   6 108.876 4.11605   2
   9   3   4 43.7335 1.04725  -1
  -9   3   7 43.7335 1.04725   2
  11   3   4 38.7536 2.24264  -1
 -11   3   8 38.7536 2.24264   2
  13   3   4 137.360 3.55449  -1
 -13   3   8 137.360 3.55449   2
  15   3   4 450.626 5.42119  -1
 -15   3   9 450.626 5.42119   2
  17   3   4 227.163 3.90311  -1
 -17   3  10 227.163 3.90311   2
  19   3   4 149.302 3.97596  -1
 -19   3  10 149.302 3.97596   2
  21   3   4 294.007 5.17905  -1
 -21   3  11 294.007 5.17905   2
  23   3   4 160.572 5.45576  -1
 -23   3  12 160.572 5.45576   2
  25   3   4 94.3372 4.82628  -1
 -25   3  12 94.3372 4.82628   2
  27   3   4 55.7946 3.52263  -1
 -27   3  13 55.7946 3.52263   2
  29   3   4 2.81878 5.45781  -1
 -29   3  14 2.81878 5.45781   2
  31   3   4 -2.3971 13.1567  -1
 -31   3  14 -2.3971 13.1567   2
  33   3   4 13.1711 5.58401  -1
 -33   3  15 13.1711 5.58401   2
 -34   4   4 6.92770 15.2364  -1
 -34   4   7 6.92770 15.2364   2
 -32   4   4 27.6390 10.1091  -1
 -32   4   7 27.6390 10.1091   2
 -30   4   4 39.2110 6.06756  -1
 -30   4   6 39.2110 6.06756   2
 -28   4   4 52.2760 4.37533  -1
 -28   4   5 52.2760 4.37533   2
 -26   4   4 50.7009 3.79106  -1
 -26   4   5 50.7009 3.79106   2
 -24   4   4 116.367 3.83263  -1
 -24   4   4 116.367 3.83263   2
 -22   4   4 23.9865 3.47960  -1
 -22   4   3 23.9865 3.47960   2
 -20   4   4 12.0000 3.20344  -1
 -20   4   3 12.0000 3.20344   2
 -18   4   4 78.9284 2.33266  -1
 -18   4   2 78.9284 2.33266   2
 -16   4   4 76.6192 3.10538  -1
 -16   4   1 76.6192 3.10538   2
 -14   4   4 134.438 4.07718  -1
 -14   4   1 134.438 4.07718   2
 -12   4   4 266.550 3.02150  -1
  12   4   0 266.550 3.02150   2
 -10   4   4 263.933 7.47295  -1
  10   4   1 263.933 7.47295   2
  -8   4   4 27.5180 2.53813  -1
   8   4   1 27.5180 2.53813   2
  -6   4   4 48.7770 0.99436  -1
   6   4   2 48.7770 0.99436   2
  -4   4   4 251.341 5.89422  -1
   4   4   3 251.341 5.89422   2
  -2   4   4 774.601 32.5657  -1
   2   4   3 774.601 32.5657   2
   0   4   4 574.277 6.54886  -1
   0   4   4 574.277 6.54886   2
   2   4   4 1568.80 35.6467  -1
  -2   4   5 1568.80 35.6467   2
   4   4   4 816.252 14.0822  -1
  -4   4   5 816.252 14.0822   2
   6   4   4 775.013 6.46979  -1
  -6   4   6 775.013 6.46979   2
   8   4   4 1288.51 18.2081  -1
  -8   4   7 1288.51 18.2081   2
  10   4   4 740.047 12.3644  -1
 -10   4   7 740.047 12.3644   2
  12   4   4 112.265 2.02050  -1
 -12   4   8 112.265 2.02050   2
  14   4   4 329.588 6.57693  -1
 -14   4   9 329.588 6.57693   2
  16   4   4 312.403 6.02151  -1
 -16   4   9 312.403 6.02151   2
  18   4   4 19.1854 1.43722  -1
 -18   4  10 19.1854 1.43722   2
  20   4   4 39.0525 2.76681  -1
 -20   4  11 39.0525 2.76681   2
  22   4   4 119.226 3.72146  -1
 -22   4  11 119.226 3.72146   2
  24   4   4 112.946 3.33446  -1
 -24   4  12 112.946 3.33446   2
  26   4   4 46.2063 3.88626  -1
 -26   4  13 46.2063 3.88626   2
  28   4   4 54.1294 5.73366  -1
 -28   4  13 54.1294 5.73366   2
  30   4   4 50.8556 6.68657  -1
 -30   4  14 50.8556 6.68657   2
  32   4   4 39.6455 9.78229  -1
 -32   4  15 39.6455 9.78229   2
  34   4   4 55.2405 15.4066  -1
 -34   4  15 55.2405 15.4066   2
 -33   5   4 5.83559 7.57852  -1
 -33   5   7 5.83559 7.57852   2
 -31   5   4 28.7707 11.2045  -1
 -31   5   6 28.7707 11.2045   2
 -29   5   4 23.0125 11.9416  -1
 -29   5   6 23.0125 11.9416   2
 -27   5   4 92.9499 4.90869  -1
 -27   5   5 92.9499 4.90869   2
 -25   5   4 40.5413 4.45859  -1
 -25   5   4 40.5413 4.45859   2
 -23   5   4 7.34866 4.47518  -1
 -23   5   4 7.34866 4.47518   2
 -21   5   4 2.18393 2.55982  -1
 -21   5   3 2.18393 2.55982   2
 -19   5   4 28.4059 4.02292  -1
 -19   5   2 28.4059 4.02292   2
 -17   5   4 8.80800 2.84609  -1
 -17   5   2 8.80800 2.84609   2
 -15   5   4 22.3268 1.44867  -1
 -15   5   1 22.3268 1.44867   2
 -13   5   4 45.6326 2.63140  -1
  13   5   0 45.6326 2.63140   2
 -11   5   4 20.8061 2.69381  -1
  11   5   0 20.8061 2.69381   2
  -9   5   4 33.6898 0.94856  -1
   9   5   1 33.6898 0.94856   2
  -7   5   4 47.3289 2.21280  -1
   7   5   2 47.3289 2.21280   2
  -5   5   4 8.25293 2.55539  -1
   5   5   2 8.25293 2.55539   2
  -3   5   4 602.546 5.93401  -1
   3   5   3 602.546 5.93401   2
  -1   5   4 435.056 8.73408  -1
   1   5   4 435.056 8.73408   2
   1   5   4 432.115 7.68685  -1
  -1   5   4 432.115 7.68685   2
   3   5   4 1341.70 13.3714  -1
  -3   5   5 1341.70 13.3714   2
   5   5   4 684.244 10.7349  -1
  -5   5   6 684.244 10.7349   2
   7   5   4 372.310 5.69706  -1
  -7   5   6 372.310 5.69706   2
   9   5   4 1154.39 10.0663  -1
  -9   5   7 1154.39 10.0663   2
  11   5   4 94.2855 2.55892  -1
 -11   5   8 94.2855 2.55892   2
  13   5   4 55.6045 2.83633  -1
 -13   5   8 55.6045 2.83633   2
  15   5   4 134.298 2.80117  -1
 -15   5   9 134.298 2.80117   2
  17   5   4 42.8343 2.94556  -1
 -17   5  10 42.8343 2.94556   2
  19   5   4 36.2455 3.36476  -1
 -19   5  10 36.2455 3.36476   2
  21   5   4 0.73492 2.64039  -1
 -21   5  11 0.73492 2.64039   2
  23   5   4 1.22861 5.44061  -1
 -23   5  12 1.22861 5.44061   2
  25   5   4 1.25729 4.02406  -1
 -25   5  12 1.25729 4.02406   2
  27   5   4 25.5526 5.49417  -1
 -27   5  13 25.5526 5.49417   2
  29   5   4 25.2315 8.63212  -1
 -29   5  14 25.2315 8.63212   2
  31   5   4 6.69683 14.3243  -1
 -31   5  14 6.69683 14.3243   2
  33   5   4 20.0129 12.2609  -1
 -33   5  15 20.0129 12.2609   2
 -32   6   4 22.4172 15.7800  -1
 -32   6   7 22.4172 15.7800   2
 -30   6   4 17.1149 5.85276  -1
 -30   6   6 17.1149 5.85276   2
 -28   6   4 37.9764 10.4585  -1
 -28   6   5 37.9764 10.4585   2
 -26   6   4 56.1056 6.00593  -1
 -26   6   5 56.1056 6.00593   2
 -24   6   4 0.37826 3.14895  -1
 -24   6   4 0.37826 3.14895   2
 -22   6   4 7.17440 4.00483  -1
 -22   6   3 7.17440 4.00483   2
 -20   6   4 20.5533 4.16039  -1
 -20   6   3 20.5533 4.16039   2
 -18   6   4 206.154 5.24458  -1
 -18   6   2 206.154 5.24458   2
 -16   6   4 233.198 4.53704  -1
 -16   6   1 233.198 4.53704   2
 -14   6   4 517.461 7.74945  -1
 -14   6   1 517.461 7.74945   2
 -12   6   4 616.824 6.47812  -1
  12   6   0 616.824 6.47812   2
 -10   6   4 365.844 5.29291  -1
  10   6   1 365.844 5.29291   2
  -8   6   4 174.356 3.94328  -1
   8   6   1 174.356 3.94328   2
  -6   6   4 160.059 1.93681  -1
   6   6   2 160.059 1.93681   2
  -4   6   4 150.759 4.47592  -1
   4   6   3 150.759 4.47592   2
  -2   6   4 129.515 3.92284  -1
   2   6   3 129.515 3.92284   2
   0   6   4 51.8611 1.12721  -1
   0   6   4 51.8611 1.12721   2
   2   6   4 659.753 8.84570  -1
  -2   6   5 659.753 8.84570   2
   4   6   4 500.926 8.07442  -1
  -4   6   5 500.926 8.07442   2
   6   6   4 15.2836 0.89442  -1
  -6   6   6 15.2836 0.89442   2
   8   6   4 495.847 6.78711  -1
  -8   6   7 495.847 6.78711   2
  10   6   4 357.368 5.72499  -1
 -10   6   7 357.368 5.72499   2
  12   6   4 109.494 1.98881  -1
 -12   6   8 109.494 1.98881   2
  14   6   4 161.955 3.42447  -1
 -14   6   9 161.955 3.42447   2
  16   6   4 297.460 5.87140  -1
 -16   6   9 297.460 5.87140   2
  18   6   4 195.760 4.79882  -1
 -18   6  10 195.760 4.79882   2
  20   6   4 141.468 6.14400  -1
 -20   6  11 141.468 6.14400   2
  22   6   4 86.7923 6.68221  -1
 -22   6  11 86.7923 6.68221   2
  24   6   4 137.744 5.19998  -1
 -24   6  12 137.744 5.19998   2
  26   6   4 15.9809 8.61168  -1
 -26   6  13 15.9809 8.61168   2
  28   6   4 24.4787 10.2617  -1
 -28   6  13 24.4787 10.2617   2
  30   6   4 9.62417 6.25632  -1
 -30   6  14 9.62417 6.25632   2
  32   6   4 2.89294 13.8519  -1
 -32   6  15 2.89294 13.8519   2
 -33   7   4 -4.6732 11.1571  -1
 -33   7   7 -4.6732 11.1571   2
 -29   7   4 2.95891 9.25780  -1
 -29   7   6 2.95891 9.25780   2
 -27   7   4 11.9224 4.79347  -1
 -27   7   5 11.9224 4.79347   2
 -25   7   4 16.2846 5.35786  -1
 -25   7   4 16.2846 5.35786   2
 -23   7   4 -0.7104 5.21549  -1
 -23   7   4 -0.7104 5.21549   2
 -21   7   4 21.6843 3.14301  -1
 -21   7   3 21.6843 3.14301   2
 -19   7   4 159.704 5.49700  -1
 -19   7   2 159.704 5.49700   2
 -17   7   4 233.844 5.33961  -1
 -17   7   2 233.844 5.33961   2
 -15   7   4 369.455 5.18653  -1
 -15   7   1 369.455 5.18653   2
 -13   7   4 1015.13 11.7274  -1
  13   7   0 1015.13 11.7274   2
 -11   7   4 1257.13 14.0591  -1
  11   7   0 1257.13 14.0591   2
  -9   7   4 208.350 2.76375  -1
   9   7   1 208.350 2.76375   2
  -7   7   4 570.276 7.63982  -1
   7   7   2 570.276 7.63982   2
  -5   7   4 349.220 6.21873  -1
   5   7   2 349.220 6.21873   2
  -3   7   4 14.7955 0.92547  -1
   3   7   3 14.7955 0.92547   2
  -1   7   4 20.4634 2.30108  -1
   1   7   4 20.4634 2.30108   2
   1   7   4 17.6317 1.97880  -1
  -1   7   4 17.6317 1.97880   2
   3   7   4 21.0210 1.01756  -1
  -3   7   5 21.0210 1.01756   2
   5   7   4 32.5515 2.32562  -1
  -5   7   6 32.5515 2.32562   2
   7   7   4 5.39538 1.79938  -1
  -7   7   6 5.39538 1.79938   2
   9   7   4 83.6557 1.77964  -1
  -9   7   7 83.6557 1.77964   2
  11   7   4 446.460 6.30296  -1
 -11   7   8 446.460 6.30296   2
  13   7   4 183.754 3.41772  -1
 -13   7   8 183.754 3.41772   2
  15   7   4 308.040 4.85525  -1
 -15   7   9 308.040 4.85525   2
  17   7   4 529.184 10.1832  -1
 -17   7  10 529.184 10.1832   2
  19   7   4 472.163 10.6452  -1
 -19   7  10 472.163 10.6452   2
  21   7   4 142.537 4.95247  -1
 -21   7  11 142.537 4.95247   2
  23   7   4 243.286 9.88778  -1
 -23   7  12 243.286 9.88778   2
  25   7   4 162.916 9.24656  -1
 -25   7  12 162.916 9.24656   2
  27   7   4 21.2002 5.32641  -1
 -27   7  13 21.2002 5.32641   2
  29   7   4 32.5275 9.38269  -1
 -29   7  14 32.5275 9.38269   2
  31   7   4 17.4038 15.5843  -1
 -31   7  14 17.4038 15.5843   2
 -30   8   4 15.2863 6.75075  -1
 -30   8   6 15.2863 6.75075   2
 -28   8   4 -21.603 14.9526  -1
 -28   8   5 -21.603 14.9526   2
 -26   8   4 17.3757 8.98822  -1
 -26   8   5 17.3757 8.98822   2
 -24   8   4 21.3952 3.85095  -1
 -24   8   4 21.3952 3.85095   2
 -22   8   4 4.69101 4.40972  -1
 -22   8   3 4.69101 4.40972   2
 -20   8   4 8.59720 4.64195  -1
 -20   8   3 8.59720 4.64195   2
 -18   8   4 140.818 3.83615  -1
 -18   8   2 140.818 3.83615   2
 -16   8   4 114.653 3.76559  -1
 -16   8   1 114.653 3.76559   2
 -14   8   4 282.174 4.38541  -1
 -14   8   1 282.174 4.38541   2
 -12   8   4 442.931 5.26077  -1
  12   8   0 442.931 5.26077   2
 -10   8   4 94.7211 2.87268  -1
  10   8   1 94.7211 2.87268   2
  -8   8   4 263.469 4.51707  -1
   8   8   1 263.469 4.51707   2
  -6   8   4 369.323 4.23073  -1
   6   8   2 369.323 4.23073   2
  -4   8   4 33.9783 2.02711  -1
   4   8   3 33.9783 2.02711   2
  -2   8   4 31.0578 2.21633  -1
   2   8   3 31.0578 2.21633   2
   0   8   4 175.026 2.33589  -1
   0   8   4 175.026 2.33589   2
   2   8   4 219.415 3.43809  -1
  -2   8   5 219.415 3.43809   2
   4   8   4 67.3326 2.57037  -1
  -4   8   5 67.3326 2.57037   2
   6   8   4 45.3456 1.67411  -1
  -6   8   6 45.3456 1.67411   2
   8   8   4 173.364 3.78623  -1
  -8   8   7 173.364 3.78623   2
  10   8   4 29.0001 2.66535  -1
 -10   8   7 29.0001 2.66535   2
  12   8   4 74.7424 2.14580  -1
 -12   8   8 74.7424 2.14580   2
  14   8   4 113.839 3.06257  -1
 -14   8   9 113.839 3.06257   2
  16   8   4 162.401 3.85076  -1
 -16   8   9 162.401 3.85076   2
  18   8   4 328.866 6.56125  -1
 -18   8  10 328.866 6.56125   2
  20   8   4 89.8390 5.33194  -1
 -20   8  11 89.8390 5.33194   2
  22   8   4 53.7847 5.18513  -1
 -22   8  11 53.7847 5.18513   2
  24   8   4 164.560 6.51766  -1
 -24   8  12 164.560 6.51766   2
  26   8   4 24.6791 9.85341  -1
 -26   8  13 24.6791 9.85341   2
  28   8   4 25.7483 13.8739  -1
 -28   8  13 25.7483 13.8739   2
 -27   9   4 56.6836 6.01996  -1
 -27   9   5 56.6836 6.01996   2
 -25   9   4 18.2940 10.3381  -1
 -25   9   4 18.2940 10.3381   2
 -23   9   4 3.59089 5.83320  -1
 -23   9   4 3.59089 5.83320   2
 -21   9   4 0.04039 3.98311  -1
 -21   9   3 0.04039 3.98311   2
 -19   9   4 20.4350 4.36795  -1
 -19   9   2 20.4350 4.36795   2
 -17   9   4 18.6161 3.70416  -1
 -17   9   2 18.6161 3.70416   2
 -15   9   4 80.0853 2.23786  -1
 -15   9   1 80.0853 2.23786   2
 -13   9   4 93.4577 3.12699  -1
  13   9   0 93.4577 3.12699   2
 -11   9   4 61.5234 2.91752  -1
  11   9   0 61.5234 2.91752   2
  -9   9   4 22.6515 1.70638  -1
   9   9   1 22.6515 1.70638   2
  -7   9   4 48.4262 2.82707  -1
   7   9   2 48.4262 2.82707   2
  -5   9   4 59.1357 2.54328  -1
   5   9   2 59.1357 2.54328   2
  -3   9   4 59.6555 1.65485  -1
   3   9   3 59.6555 1.65485   2
  -1   9   4 200.234 3.48018  -1
   1   9   4 200.234 3.48018   2
   1   9   4 205.252 3.52196  -1
  -1   9   4 205.252 3.52196   2
   3   9   4 207.290 2.82535  -1
  -3   9   5 207.290 2.82535   2
   5   9   4 220.662 4.20171  -1
  -5   9   6 220.662 4.20171   2
   7   9   4 208.630 3.91871  -1
  -7   9   6 208.630 3.91871   2
   9   9   4 281.780 4.57146  -1
  -9   9   7 281.780 4.57146   2
  11   9   4 77.1955 3.70843  -1
 -11   9   8 77.1955 3.70843   2
  13   9   4 43.6025 2.92153  -1
 -13   9   8 43.6025 2.92153   2
  15   9   4 65.9523 2.46096  -1
 -15   9   9 65.9523 2.46096   2
  17   9   4 58.8828 3.44469  -1
 -17   9  10 58.8828 3.44469   2
  19   9   4 56.6256 5.53305  -1
 -19   9  10 56.6256 5.53305   2
  21   9   4 43.3473 3.98596  -1
 -21   9  11 43.3473 3.98596   2
  23   9   4 10.4773 8.55223  -1
 -23   9  12 10.4773 8.55223   2
  25   9   4 1.67943 7.90440  -1
 -25   9  12 1.67943 7.90440   2
  27   9   4 2.38038 6.14976  -1
 -27   9  13 2.38038 6.14976   2
  29   9   4 -8.2697 14.8937  -1
 -29   9  14 -8.2697 14.8937   2
 -24  10   4 -4.4792 5.61891  -1
 -24  10   4 -4.4792 5.61891   2
 -22  10   4 6.53946 6.92062  -1
 -22  10   3 6.53946 6.92062   2
 -20  10   4 14.0514 6.29724  -1
 -20  10   3 14.0514 6.29724   2
 -18  10   4 18.5003 3.22785  -1
 -18  10   2 18.5003 3.22785   2
 -16  10   4 7.55218 3.06675  -1
 -16  10   1 7.55218 3.06675   2
 -14  10   4 -2.2435 2.96441  -1
 -14  10   1 -2.2435 2.96441   2
 -12  10   4 89.4229 2.74196  -1
  12  10   0 89.4229 2.74196   2
 -10  10   4 19.8457 2.86013  -1
  10  10   1 19.8457 2.86013   2
  -8  10   4 12.4154 2.90067  -1
   8  10   1 12.4154 2.90067   2
  -6  10   4 13.2928 1.57439  -1
   6  10   2 13.2928 1.57439   2
  -4  10   4 80.7963 2.99553  -1
   4  10   3 80.7963 2.99553   2
  -2  10   4 132.801 3.11067  -1
   2  10   3 132.801 3.11067   2
   0  10   4 46.7966 1.80512  -1
   0  10   4 46.7966 1.80512   2
   2  10   4 287.049 4.64086  -1
  -2  10   5 287.049 4.64086   2
   4  10   4 241.531 4.01540  -1
  -4  10   5 241.531 4.01540   2
   6  10   4 239.403 4.02342  -1
  -6  10   6 239.403 4.02342   2
   8  10   4 265.219 5.26906  -1
  -8  10   7 265.219 5.26906   2
  10  10   4 90.4628 3.59457  -1
 -10  10   7 90.4628 3.59457   2
  12  10   4 15.4491 2.21554  -1
 -12  10   8 15.4491 2.21554   2
  14  10   4 94.3341 3.88287  -1
 -14  10   9 94.3341 3.88287   2
  16  10   4 39.6950 3.36702  -1
 -16  10   9 39.6950 3.36702   2
  18  10   4 5.37437 2.57171  -1
 -18  10  10 5.37437 2.57171   2
  20  10   4 12.2066 6.77964  -1
 -20  10  11 12.2066 6.77964   2
  22  10   4 4.48787 5.96297  -1
 -22  10  11 4.48787 5.96297   2
  24  10   4 -0.5748 5.04791  -1
 -24  10  12 -0.5748 5.04791   2
 -27  11   4 4.02685 10.5677  -1
 -27  11   5 4.02685 10.5677   2
 -23  11   4 -0.2060 13.5766  -1
 -23  11   4 -0.2060 13.5766   2
 -21  11   4 12.9027 6.00388  -1
 -21  11   3 12.9027 6.00388   2
 -19  11   4 3.67757 6.87830  -1
 -19  11   2 3.67757 6.87830   2
 -17  11   4 11.3501 4.17944  -1
 -17  11   2 11.3501 4.17944   2
 -15  11   4 106.312 3.49165  -1
 -15  11   1 106.312 3.49165   2
 -13  11   4 71.9699 4.01608  -1
  13  11   0 71.9699 4.01608   2
 -11  11   4 65.6310 3.93982  -1
  11  11   0 65.6310 3.93982   2
  -9  11   4 187.473 3.94690  -1
   9  11   1 187.473 3.94690   2
  -7  11   4 19.8881 3.13270  -1
   7  11   2 19.8881 3.13270   2
  -5  11   4 45.7857 3.20583  -1
   5  11   2 45.7857 3.20583   2
  -3  11   4 144.909 3.05721  -1
   3  11   3 144.909 3.05721   2
  -1  11   4 108.389 3.49877  -1
   1  11   4 108.389 3.49877   2
   1  11   4 105.323 3.27861  -1
  -1  11   4 105.323 3.27861   2
   3  11   4 146.670 3.14396  -1
  -3  11   5 146.670 3.14396   2
   5  11   4 71.4375 3.42014  -1
  -5  11   6 71.4375 3.42014   2
   7  11   4 136.913 4.02979  -1
  -7  11   6 136.913 4.02979   2
   9  11   4 114.371 3.48139  -1
  -9  11   7 114.371 3.48139   2
  11  11   4 14.9739 3.77712  -1
 -11  11   8 14.9739 3.77712   2
  13  11   4 34.1648 4.29169  -1
 -13  11   8 34.1648 4.29169   2
  15  11   4 168.048 4.41464  -1
 -15  11   9 168.048 4.41464   2
  17  11   4 58.3071 4.46443  -1
 -17  11  10 58.3071 4.46443   2
  19  11   4 34.6749 6.63777  -1
 -19  11  10 34.6749 6.63777   2
  21  11   4 67.3487 5.39954  -1
 -21  11  11 67.3487 5.39954   2
  23  11   4 26.7638 13.2008  -1
 -23  11  12 26.7638 13.2008   2
  25  11   4 37.9792 15.5252  -1
 -25  11  12 37.9792 15.5252   2
 -20  12   4 34.1093 14.0038  -1
 -20  12   3 34.1093 14.0038   2
 -18  12   4 22.4520 3.74614  -1
 -18  12   2 22.4520 3.74614   2
 -16  12   4 143.306 6.31137  -1
 -16  12   1 143.306 6.31137   2
 -14  12   4 119.707 5.26283  -1
 -14  12   1 119.707 5.26283   2
 -12  12   4 93.5991 3.57711  -1
  12  12   0 93.5991 3.57711   2
 -10  12   4 162.067 4.97357  -1
  10  12   1 162.067 4.97357   2
  -8  12   4 127.117 4.98163  -1
   8  12   1 127.117 4.98163   2
  -6  12   4 29.9540 2.54006  -1
   6  12   2 29.9540 2.54006   2
  -4  12   4 49.6481 3.44964  -1
   4  12   3 49.6481 3.44964   2
  -2  12   4 22.4825 3.13817  -1
   2  12   3 22.4825 3.13817   2
   0  12   4 -2.0585 1.86208  -1
   0  12   4 -2.0585 1.86208   2
   2  12   4 2.50102 3.21925  -1
  -2  12   5 2.50102 3.21925   2
   4  12   4 4.88796 2.97314  -1
  -4  12   5 4.88796 2.97314   2
   6  12   4 3.40495 2.11035  -1
  -6  12   6 3.40495 2.11035   2
   8  12   4 1.75175 4.02213  -1
  -8  12   7 1.75175 4.02213   2
  10  12   4 13.6594 4.06014  -1
 -10  12   7 13.6594 4.06014   2
  12  12   4 18.1596 2.71283  -1
 -12  12   8 18.1596 2.71283   2
  14  12   4 114.853 6.01970  -1
 -14  12   9 114.853 6.01970   2
  16  12   4 74.0846 6.40008  -1
 -16  12   9 74.0846 6.40008   2
  18  12   4 52.8502 4.49856  -1
 -18  12  10 52.8502 4.49856   2
  20  12   4 112.140 15.4332  -1
 -20  12  11 112.140 15.4332   2
  22  12   4 76.0578 15.3144  -1
 -22  12  11 76.0578 15.3144   2
  24  12   4 7.89997 7.26435  -1
 -24  12  12 7.89997 7.26435   2
 -17  13   4 14.9163 13.9653  -1
 -17  13   2 14.9163 13.9653   2
 -15  13   4 53.0719 4.01961  -1
 -15  13   1 53.0719 4.01961   2
 -13  13   4 44.8828 6.60788  -1
  13  13   0 44.8828 6.60788   2
 -11  13   4 16.8141 5.30152  -1
  11  13   0 16.8141 5.30152   2
  -9  13   4 59.1025 3.47348  -1
   9  13   1 59.1025 3.47348   2
  -7  13   4 30.2288 4.44631  -1
   7  13   2 30.2288 4.44631   2
  -5  13   4 15.2359 4.90620  -1
   5  13   2 15.2359 4.90620   2
  -3  13   4 27.6621 2.33841  -1
   3  13   3 27.6621 2.33841   2
  -1  13   4 95.5857 4.15059  -1
   1  13   4 95.5857 4.15059   2
   1  13   4 97.5493 4.05333  -1
  -1  13   4 97.5493 4.05333   2
   3  13   4 52.2320 2.58376  -1
  -3  13   5 52.2320 2.58376   2
   5  13   4 87.3777 4.69818  -1
  -5  13   6 87.3777 4.69818   2
   7  13   4 86.8524 4.78990  -1
  -7  13   6 86.8524 4.78990   2
   9  13   4 10.4151 2.84563  -1
  -9  13   7 10.4151 2.84563   2
  11  13   4 23.2732 5.47039  -1
 -11  13   8 23.2732 5.47039   2
  13  13   4 23.3232 7.45295  -1
 -13  13   8 23.3232 7.45295   2
  15  13   4 0.13100 3.65078  -1
 -15  13   9 0.13100 3.65078   2
  17  13   4 26.1453 13.7292  -1
 -17  13  10 26.1453 13.7292   2
  19  13   4 27.5682 14.0269  -1
 -19  13  10 27.5682 14.0269   2
  21  13   4 29.1760 9.76161  -1
 -21  13  11 29.1760 9.76161   2
 -18  14   4 29.1527 10.3273  -1
 -18  14   2 29.1527 10.3273   2
 -14  14   4 7.00434 6.86244  -1
 -14  14   1 7.00434 6.86244   2
 -12  14   4 7.10076 3.64436  -1
  12  14   0 7.10076 3.64436   2
 -10  14   4 -2.8933 5.48958  -1
  10  14   1 -2.8933 5.48958   2
  -8  14   4 2.03192 5.54240  -1
   8  14   1 2.03192 5.54240   2
  -6  14   4 25.9223 3.06217  -1
   6  14   2 25.9223 3.06217   2
  -4  14   4 42.7010 5.56550  -1
   4  14   3 42.7010 5.56550   2
  -2  14   4 110.075 5.99799  -1
   2  14   3 110.075 5.99799   2
   0  14   4 326.378 5.95924  -1
   0  14   4 326.378 5.95924   2
   2  14   4 163.982 6.12812  -1
  -2  14   5 163.982 6.12812   2
   4  14   4 91.0201 5.80443  -1
  -4  14   5 91.0201 5.80443   2
   6  14   4 230.396 5.74587  -1
  -6  14   6 230.396 5.74587   2
   8  14   4 90.6644 6.58065  -1
  -8  14   7 90.6644 6.58065   2
  10  14   4 33.2926 6.90627  -1
 -10  14   7 33.2926 6.90627   2
  12  14   4 34.7568 5.01618  -1
 -12  14   8 34.7568 5.01618   2
  14  14   4 24.0808 13.8594  -1
 -14  14   9 24.0808 13.8594   2
  16  14   4 0.80277 13.9738  -1
 -16  14   9 0.80277 13.9738   2
  18  14   4 4.36086 8.46808  -1
 -18  14  10 4.36086 8.46808   2
 -15  15   4 18.4879 9.96052  -1
 -15  15   1 18.4879 9.96052   2
 -13  15   4 -16.196 9.78398  -1
  13  15   0 -16.196 9.78398   2
 -11  15   4 10.7936 9.73337  -1
  11  15   0 10.7936 9.73337   2
  -9  15   4 0.60860 4.40226  -1
   9  15   1 0.60860 4.40226   2
  -7  15   4 6.69646 7.51137  -1
   7  15   2 6.69646 7.51137   2
  -5  15   4 16.5668 6.17618  -1
   5  15   2 16.5668 6.17618   2
  -3  15   4 41.7214 4.00440  -1
   3  15   3 41.7214 4.00440   2
  -1  15   4 92.6036 6.51485  -1
   1  15   4 92.6036 6.51485   2
   1  15   4 85.8179 5.81254  -1
  -1  15   4 85.8179 5.81254   2
   3  15   4 110.931 4.57236  -1
  -3  15   5 110.931 4.57236   2
   5  15   4 152.048 8.10953  -1
  -5  15   6 152.048 8.10953   2
   7  15   4 137.359 11.4080  -1
  -7  15   6 137.359 11.4080   2
   9  15   4 16.0925 4.84532  -1
  -9  15   7 16.0925 4.84532   2
  11  15   4 41.4345 14.8959  -1
 -11  15   8 41.4345 14.8959   2
  13  15   4 41.9111 14.9074  -1
 -13  15   8 41.9111 14.9074   2
  -8  16   4 29.9613 15.1760  -1
   8  16   1 29.9613 15.1760   2
  -6  16   4 9.11179 6.36173  -1
   6  16   2 9.11179 6.36173   2
  -4  16   4 16.8951 10.5929  -1
   4  16   3 16.8951 10.5929   2
  -2  16   4 3.86783 10.4624  -1
   2  16   3 3.86783 10.4624   2
   0  16   4 14.9249 6.83897  -1
   0  16   4 14.9249 6.83897   2
   2  16   4 18.9038 10.3577  -1
  -2  16   5 18.9038 10.3577   2
   4  16   4 14.0725 10.1810  -1
  -4  16   5 14.0725 10.1810   2
   6  16   4 23.4169 9.62105  -1
  -6  16   6 23.4169 9.62105   2
 -30   0   5 6.40670 8.81879  -1
 -30   0   5 6.40670 8.81879   2
 -28   0   5 37.6519 7.92681  -1
 -28   0   4 37.6519 7.92681   2
 -26   0   5 143.297 7.75093  -1
 -26   0   4 143.297 7.75093   2
 -24   0   5 -3.8933 2.39106  -1
 -24   0   3 -3.8933 2.39106   2
 -22   0   5 4.78119 3.21730  -1
 -22   0   2 4.78119 3.21730   2
 -20   0   5 162.508 4.60165  -1
 -20   0   2 162.508 4.60165   2
 -18   0   5 0.87992 1.59236  -1
 -18   0   1 0.87992 1.59236   2
 -16   0   5 -1.8552 2.61273  -1
  16   0   0 -1.8552 2.61273   2
 -14   0   5 54.7383 3.63047  -1
  14   0   0 54.7383 3.63047   2
 -12   0   5 1.45783 1.14416  -1
  12   0   1 1.45783 1.14416   2
 -10   0   5 56.0225 3.04455  -1
  10   0   2 56.0225 3.04455   2
  -8   0   5 0.28887 0.71530   2
  -8   0   5 65.2296 3.11432  -1
   8   0   2 65.2296 3.11432   2
  -6   0   5 1.91351 0.74254  -1
   6   0   3 1.91351 0.74254   2
  -4   0   5 1108.97 28.8251  -1
   4   0   4 1108.97 28.8251   2
  -2   0   5 32.3217 3.42655  -1
   2   0   4 32.3217 3.42655   2
   0   0   5 3.69439 1.00206  -1
   0   0   5 3.69439 1.00206   2
   2   0   5 4204.96 87.9038  -1
  -2   0   6 4204.96 87.9038   2
   4   0   5 919.632 23.7819  -1
  -4   0   6 919.632 23.7819   2
   6   0   5 0.87925 0.75909  -1
  -6   0   7 0.87925 0.75909   2
   8   0   5 277.090 8.63079  -1
  -8   0   8 277.090 8.63079   2
  10   0   5 204.560 4.64068  -1
 -10   0   8 204.560 4.64068   2
  12   0   5 -0.3098 0.99920  -1
 -12   0   9 -0.3098 0.99920   2
  14   0   5 45.5244 2.73970  -1
 -14   0  10 45.5244 2.73970   2
  16   0   5 15.8338 3.43803  -1
 -16   0  10 15.8338 3.43803   2
  18   0   5 0.84140 1.85953  -1
 -18   0  11 0.84140 1.85953   2
  20   0   5 -4.3641 3.52071  -1
 -20   0  12 -4.3641 3.52071   2
  22   0   5 13.4787 5.10347  -1
 -22   0  12 13.4787 5.10347   2
  24   0   5 -4.3093 2.19393  -1
 -24   0  13 -4.3093 2.19393   2
 -33   1   5 17.9463 7.45390  -1
 -33   1   6 17.9463 7.45390   2
 -31   1   5 -0.5016 8.23191  -1
 -31   1   5 -0.5016 8.23191   2
 -29   1   5 2.35065 4.13099  -1
 -29   1   5 2.35065 4.13099   2
 -27   1   5 71.9709 3.72332  -1
 -27   1   4 71.9709 3.72332   2
 -25   1   5 48.6951 4.08269  -1
 -25   1   3 48.6951 4.08269   2
 -23   1   5 141.175 4.11467  -1
 -23   1   3 141.175 4.11467   2
 -21   1   5 202.299 3.07393  -1
 -21   1   2 202.299 3.07393   2
 -19   1   5 146.132 2.95186  -1
 -19   1   1 146.132 2.95186   2
 -17   1   5 176.173 3.41774  -1
 -17   1   1 176.173 3.41774   2
 -15   1   5 333.307 3.41549  -1
  15   1   0 333.307 3.41549   2
 -13   1   5 639.798 8.95131  -1
  13   1   1 639.798 8.95131   2
 -11   1   5 639.496 9.18145  -1
  11   1   1 639.496 9.18145   2
  -9   1   5 513.970 5.40911  -1
   9   1   2 513.970 5.40911   2
  -7   1   5 325.154 6.15947  -1
   7   1   3 325.154 6.15947   2
  -5   1   5 659.913 14.4845  -1
   5   1   3 659.913 14.4845   2
  -3   1   5 2290.28 24.7195  -1
   3   1   4 2290.28 24.7195   2
  -1   1   5 570.292 15.0604  -1
   1   1   5 570.292 15.0604   2
   1   1   5 549.480 21.2786  -1
  -1   1   5 549.480 21.2786   2
   3   1   5 753.456 10.6910  -1
  -3   1   6 753.456 10.6910   2
   7   1   5 57.2158 3.34675  -1
  -7   1   7 57.2158 3.34675   2
   9   1   5 323.937 3.91589  -1
  -9   1   8 323.937 3.91589   2
  11   1   5 520.466 7.20578  -1
 -11   1   9 520.466 7.20578   2
  13   1   5 301.250 4.90087  -1
 -13   1   9 301.250 4.90087   2
  15   1   5 238.261 2.86144  -1
 -15   1  10 238.261 2.86144   2
  17   1   5 539.584 6.43368  -1
 -17   1  11 539.584 6.43368   2
  19   1   5 318.930 5.59923  -1
 -19   1  11 318.930 5.59923   2
  21   1   5 11.5452 1.68722  -1
 -21   1  12 11.5452 1.68722   2
  23   1   5 28.6978 4.43880  -1
 -23   1  13 28.6978 4.43880   2
  25   1   5 56.0550 5.12098  -1
 -25   1  13 56.0550 5.12098   2
  27   1   5 6.28289 2.90191  -1
 -27   1  14 6.28289 2.90191   2
  29   1   5 -2.1075 11.8758  -1
 -29   1  15 -2.1075 11.8758   2
 -36   2   5 1.31500 10.0235  -1
 -36   2   7 1.31500 10.0235   2
 -34   2   5 11.8385 14.3027  -1
 -34   2   6 11.8385 14.3027   2
 -32   2   5 -9.3275 11.7354  -1
 -32   2   6 -9.3275 11.7354   2
 -30   2   5 -4.3987 2.82411  -1
 -30   2   5 -4.3987 2.82411   2
 -28   2   5 44.0658 4.39547  -1
 -28   2   4 44.0658 4.39547   2
 -26   2   5 66.3970 4.05617  -1
 -26   2   4 66.3970 4.05617   2
 -24   2   5 96.8532 3.24684  -1
 -24   2   3 96.8532 3.24684   2
 -22   2   5 229.320 4.73924  -1
 -22   2   2 229.320 4.73924   2
 -20   2   5 300.455 5.48651  -1
 -20   2   2 300.455 5.48651   2
 -18   2   5 733.437 7.72872  -1
 -18   2   1 733.437 7.72872   2
 -16   2   5 706.940 10.9580  -1
  16   2   0 706.940 10.9580   2
 -14   2   5 1338.54 20.5256  -1
  14   2   0 1338.54 20.5256   2
 -12   2   5 1494.93 13.2154  -1
  12   2   1 1494.93 13.2154   2
 -10   2   5 775.539 12.4701  -1
  10   2   2 775.539 12.4701   2
  -8   2   5 1445.19 27.2727  -1
   8   2   2 1445.19 27.2727   2
  -6   2   5 734.992 7.10140  -1
   6   2   3 734.992 7.10140   2
  -4   2   5 238.379 6.02204  -1
   4   2   4 238.379 6.02204   2
  -2   2   5 948.799 38.2186  -1
   2   2   4 948.799 38.2186   2
   0   2   5 415.033 5.08431  -1
   0   2   5 415.033 5.08431   2
   2   2   5 920.551 25.3424  -1
  -2   2   6 920.551 25.3424   2
   4   2   5 280.548 6.02759  -1
  -4   2   6 280.548 6.02759   2
   6   2   5 406.114 4.71759  -1
  -6   2   7 406.114 4.71759   2
   8   2   5 490.533 6.63798  -1
  -8   2   8 490.533 6.63798   2
  10   2   5 653.640 9.83290  -1
 -10   2   8 653.640 9.83290   2
  12   2   5 1140.58 10.6437  -1
 -12   2   9 1140.58 10.6437   2
  14   2   5 585.355 10.1464  -1
 -14   2  10 585.355 10.1464   2
  16   2   5 819.901 10.7708  -1
 -16   2  10 819.901 10.7708   2
  18   2   5 433.686 5.42220  -1
 -18   2  11 433.686 5.42220   2
  20   2   5 200.970 5.13575  -1
 -20   2  12 200.970 5.13575   2
  22   2   5 169.398 6.29836  -1
 -22   2  12 169.398 6.29836   2
  24   2   5 79.5018 3.52816  -1
 -24   2  13 79.5018 3.52816   2
  26   2   5 -3.7709 5.69197  -1
 -26   2  14 -3.7709 5.69197   2
  28   2   5 35.5644 7.98361  -1
 -28   2  14 35.5644 7.98361   2
  30   2   5 -0.2397 3.98639  -1
 -30   2  15 -0.2397 3.98639   2
  32   2   5 1.07753 13.6984  -1
 -32   2  16 1.07753 13.6984   2
 -35   3   5 9.62100 13.8529  -1
 -35   3   7 9.62100 13.8529   2
 -33   3   5 7.60594 4.82039  -1
 -33   3   6 7.60594 4.82039   2
 -31   3   5 -3.3005 13.2583  -1
 -31   3   5 -3.3005 13.2583   2
 -29   3   5 -1.1750 3.75230  -1
 -29   3   5 -1.1750 3.75230   2
 -27   3   5 10.9136 2.74090  -1
 -27   3   4 10.9136 2.74090   2
 -25   3   5 55.2155 3.68513  -1
 -25   3   3 55.2155 3.68513   2
 -23   3   5 135.510 4.11360  -1
 -23   3   3 135.510 4.11360   2
 -21   3   5 180.498 3.28203  -1
 -21   3   2 180.498 3.28203   2
 -19   3   5 422.438 7.21889  -1
 -19   3   1 422.438 7.21889   2
 -17   3   5 847.954 14.0565  -1
 -17   3   1 847.954 14.0565   2
 -15   3   5 797.048 7.61781  -1
  15   3   0 797.048 7.61781   2
 -13   3   5 1085.76 16.0661  -1
  13   3   1 1085.76 16.0661   2
 -11   3   5 887.739 14.7555  -1
  11   3   1 887.739 14.7555   2
  -9   3   5 58.7673 1.09866  -1
   9   3   2 58.7673 1.09866   2
  -7   3   5 309.217 8.22717  -1
   7   3   3 309.217 8.22717   2
  -5   3   5 458.469 13.1225  -1
   5   3   3 458.469 13.1225   2
  -3   3   5 10.4612 0.60999  -1
   3   3   4 10.4612 0.60999   2
  -1   3   5 83.1982 6.05589  -1
   1   3   5 83.1982 6.05589   2
   1   3   5 75.4199 4.06275  -1
  -1   3   5 75.4199 4.06275   2
   3   3   5 223.661 2.78771  -1
  -3   3   6 223.661 2.78771   2
   5   3   5 102.540 2.64436  -1
  -5   3   7 102.540 2.64436   2
   7   3   5 196.534 3.68504  -1
  -7   3   7 196.534 3.68504   2
   9   3   5 347.230 3.38198  -1
  -9   3   8 347.230 3.38198   2
  11   3   5 667.163 10.1818  -1
 -11   3   9 667.163 10.1818   2
  13   3   5 471.544 6.96546  -1
 -13   3   9 471.544 6.96546   2
  15   3   5 483.742 5.80329  -1
 -15   3  10 483.742 5.80329   2
  17   3   5 518.842 6.73089  -1
 -17   3  11 518.842 6.73089   2
  19   3   5 312.931 5.27215  -1
 -19   3  11 312.931 5.27215   2
  21   3   5 260.468 5.02857  -1
 -21   3  12 260.468 5.02857   2
  23   3   5 78.0186 4.39745  -1
 -23   3  13 78.0186 4.39745   2
  25   3   5 53.3977 4.57373  -1
 -25   3  13 53.3977 4.57373   2
  27   3   5 5.69156 2.92113  -1
 -27   3  14 5.69156 2.92113   2
  29   3   5 -1.7441 6.34791  -1
 -29   3  15 -1.7441 6.34791   2
  31   3   5 11.2083 13.2106  -1
 -31   3  15 11.2083 13.2106   2
  33   3   5 9.58588 7.64041  -1
 -33   3  16 9.58588 7.64041   2
 -32   4   5 57.2143 10.9385  -1
 -32   4   6 57.2143 10.9385   2
 -30   4   5 53.6850 4.80038  -1
 -30   4   5 53.6850 4.80038   2
 -28   4   5 47.7363 4.48103  -1
 -28   4   4 47.7363 4.48103   2
 -26   4   5 50.3956 3.85400  -1
 -26   4   4 50.3956 3.85400   2
 -24   4   5 69.3537 2.91894  -1
 -24   4   3 69.3537 2.91894   2
 -22   4   5 29.3649 3.20297  -1
 -22   4   2 29.3649 3.20297   2
 -20   4   5 81.5835 3.89799  -1
 -20   4   2 81.5835 3.89799   2
 -18   4   5 170.051 3.30064  -1
 -18   4   1 170.051 3.30064   2
 -16   4   5 263.972 4.43759  -1
  16   4   0 263.972 4.43759   2
 -14   4   5 89.7014 2.80576  -1
  14   4   0 89.7014 2.80576   2
 -12   4   5 278.103 2.95463  -1
  12   4   1 278.103 2.95463   2
 -10   4   5 104.610 2.99469  -1
  10   4   2 104.610 2.99469   2
  -8   4   5 192.009 7.10026  -1
   8   4   2 192.009 7.10026   2
  -6   4   5 858.831 7.71241  -1
   6   4   3 858.831 7.71241   2
  -4   4   5 819.943 16.4375  -1
   4   4   4 819.943 16.4375   2
  -2   4   5 1625.64 65.4198  -1
   2   4   4 1625.64 65.4198   2
   0   4   5 1739.19 16.5677  -1
   0   4   5 1739.19 16.5677   2
   2   4   5 1318.14 22.6564  -1
  -2   4   6 1318.14 22.6564   2
   4   4   5 1070.77 15.4240  -1
  -4   4   6 1070.77 15.4240   2
   6   4   5 411.291 3.59069  -1
  -6   4   7 411.291 3.59069   2
   8   4   5 116.915 2.59847  -1
  -8   4   8 116.915 2.59847   2
  10   4   5 35.3623 1.91261  -1
 -10   4   8 35.3623 1.91261   2
  12   4   5 250.332 3.17332  -1
 -12   4   9 250.332 3.17332   2
  14   4   5 82.1129 2.60500  -1
 -14   4  10 82.1129 2.60500   2
  16   4   5 33.2139 2.20558  -1
 -16   4  10 33.2139 2.20558   2
  18   4   5 134.690 2.58115  -1
 -18   4  11 134.690 2.58115   2
  20   4   5 12.4946 2.61129  -1
 -20   4  12 12.4946 2.61129   2
  22   4   5 37.8945 3.39691  -1
 -22   4  12 37.8945 3.39691   2
  24   4   5 10.6010 2.36484  -1
 -24   4  13 10.6010 2.36484   2
  26   4   5 18.4532 4.89319  -1
 -26   4  14 18.4532 4.89319   2
  28   4   5 31.5289 7.86830  -1
 -28   4  14 31.5289 7.86830   2
  30   4   5 45.1643 5.02728  -1
 -30   4  15 45.1643 5.02728   2
  32   4   5 35.9269 14.1336  -1
 -32   4  16 35.9269 14.1336   2
  34   4   5 33.4712 15.6050  -1
 -34   4  16 33.4712 15.6050   2
 -35   5   5 33.7908 17.0626  -1
 -35   5   7 33.7908 17.0626   2
 -33   5   5 63.0514 8.80570  -1
 -33   5   6 63.0514 8.80570   2
 -31   5   5 145.835 13.5515  -1
 -31   5   5 145.835 13.5515   2
 -29   5   5 110.492 8.69511  -1
 -29   5   5 110.492 8.69511   2
 -27   5   5 79.3175 4.71685  -1
 -27   5   4 79.3175 4.71685   2
 -25   5   5 119.368 5.34190  -1
 -25   5   3 119.368 5.34190   2
 -23   5   5 80.2967 5.49070  -1
 -23   5   3 80.2967 5.49070   2
 -21   5   5 20.8561 2.86295  -1
 -21   5   2 20.8561 2.86295   2
 -19   5   5 85.8134 4.63382  -1
 -19   5   1 85.8134 4.63382   2
 -17   5   5 16.9847 2.89037  -1
 -17   5   1 16.9847 2.89037   2
 -15   5   5 41.1736 1.57871  -1
  15   5   0 41.1736 1.57871   2
 -13   5   5 78.1547 2.69577  -1
  13   5   1 78.1547 2.69577   2
 -11   5   5 125.384 3.18493  -1
  11   5   1 125.384 3.18493   2
  -9   5   5 698.456 6.16437  -1
   9   5   2 698.456 6.16437   2
  -7   5   5 878.844 15.1574  -1
   7   5   3 878.844 15.1574   2
  -5   5   5 818.318 18.8373  -1
   5   5   3 818.318 18.8373   2
  -3   5   5 1313.67 12.3362  -1
   3   5   4 1313.67 12.3362   2
  -1   5   5 2795.72 43.3979  -1
   1   5   5 2795.72 43.3979   2
   1   5   5 2787.15 37.1179  -1
  -1   5   5 2787.15 37.1179   2
   3   5   5 1967.10 17.2105  -1
  -3   5   6 1967.10 17.2105   2
   5   5   5 1120.10 15.2326  -1
  -5   5   7 1120.10 15.2326   2
   7   5   5 1627.83 19.8525  -1
  -7   5   7 1627.83 19.8525   2
   9   5   5 378.355 4.00327  -1
  -9   5   8 378.355 4.00327   2
  11   5   5 34.6663 2.04602  -1
 -11   5   9 34.6663 2.04602   2
  13   5   5 118.870 2.64904  -1
 -13   5   9 118.870 2.64904   2
  15   5   5 47.6721 1.81894  -1
 -15   5  10 47.6721 1.81894   2
  17   5   5 9.61421 2.39848  -1
 -17   5  11 9.61421 2.39848   2
  19   5   5 -0.6451 3.28071  -1
 -19   5  11 -0.6451 3.28071   2
  21   5   5 54.0901 2.48872  -1
 -21   5  12 54.0901 2.48872   2
  23   5   5 82.6330 4.53740  -1
 -23   5  13 82.6330 4.53740   2
  25   5   5 68.7218 5.39896  -1
 -25   5  13 68.7218 5.39896   2
  27   5   5 58.8699 4.84442  -1
 -27   5  14 58.8699 4.84442   2
  29   5   5 103.031 10.4124  -1
 -29   5  15 103.031 10.4124   2
  31   5   5 80.8790 16.1137  -1
 -31   5  15 80.8790 16.1137   2
  33   5   5 50.2737 13.7242  -1
 -33   5  16 50.2737 13.7242   2
 -30   6   5 65.8744 7.14709  -1
 -30   6   5 65.8744 7.14709   2
 -28   6   5 13.3004 10.4387  -1
 -28   6   4 13.3004 10.4387   2
 -26   6   5 53.5842 5.87693  -1
 -26   6   4 53.5842 5.87693   2
 -24   6   5 31.7429 3.50121  -1
 -24   6   3 31.7429 3.50121   2
 -22   6   5 58.4263 4.48714  -1
 -22   6   2 58.4263 4.48714   2
 -20   6   5 47.7769 4.48014  -1
 -20   6   2 47.7769 4.48014   2
 -18   6   5 -0.1401 2.47971  -1
 -18   6   1 -0.1401 2.47971   2
 -16   6   5 332.585 5.84617  -1
  16   6   0 332.585 5.84617   2
 -14   6   5 211.293 4.62067  -1
  14   6   0 211.293 4.62067   2
 -12   6   5 64.0721 1.51998  -1
  12   6   1 64.0721 1.51998   2
 -10   6   5 210.220 3.67205  -1
  10   6   2 210.220 3.67205   2
  -8   6   5 290.067 5.43978  -1
   8   6   2 290.067 5.43978   2
  -6   6   5 365.040 3.49394  -1
   6   6   3 365.040 3.49394   2
  -4   6   5 492.699 8.26076  -1
   4   6   4 492.699 8.26076   2
  -2   6   5 628.574 12.6299  -1
   2   6   4 628.574 12.6299   2
   0   6   5 1263.74 10.5568  -1
   0   6   5 1263.74 10.5568   2
   2   6   5 535.310 7.42018  -1
  -2   6   6 535.310 7.42018   2
   4   6   5 564.223 8.47863  -1
  -4   6   6 564.223 8.47863   2
   6   6   5 690.903 6.53531  -1
  -6   6   7 690.903 6.53531   2
   8   6   5 217.796 3.31649  -1
  -8   6   8 217.796 3.31649   2
  10   6   5 97.5481 2.58798  -1
 -10   6   8 97.5481 2.58798   2
  12   6   5 5.69546 1.18580  -1
 -12   6   9 5.69546 1.18580   2
  14   6   5 138.325 3.19021  -1
 -14   6  10 138.325 3.19021   2
  16   6   5 80.6437 3.21173  -1
 -16   6  10 80.6437 3.21173   2
  18   6   5 34.9166 2.76152  -1
 -18   6  11 34.9166 2.76152   2
  20   6   5 139.692 5.60036  -1
 -20   6  12 139.692 5.60036   2
  22   6   5 104.930 6.05577  -1
 -22   6  12 104.930 6.05577   2
  24   6   5 41.6174 3.80099  -1
 -24   6  13 41.6174 3.80099   2
  26   6   5 39.8813 8.91877  -1
 -26   6  14 39.8813 8.91877   2
  28   6   5 77.0064 11.1470  -1
 -28   6  14 77.0064 11.1470   2
  30   6   5 42.4393 7.03109  -1
 -30   6  15 42.4393 7.03109   2
  32   6   5 11.4222 15.0644  -1
 -32   6  16 11.4222 15.0644   2
 -33   7   5 2.30622 11.1925  -1
 -33   7   6 2.30622 11.1925   2
 -29   7   5 1.67003 9.32086  -1
 -29   7   5 1.67003 9.32086   2
 -27   7   5 17.5073 4.94074  -1
 -27   7   4 17.5073 4.94074   2
 -25   7   5 2.37373 4.88074  -1
 -25   7   3 2.37373 4.88074   2
 -23   7   5 3.41662 5.24141  -1
 -23   7   3 3.41662 5.24141   2
 -21   7   5 118.436 4.55327  -1
 -21   7   2 118.436 4.55327   2
 -19   7   5 20.4898 3.87161  -1
 -19   7   1 20.4898 3.87161   2
 -17   7   5 43.3503 3.28858  -1
 -17   7   1 43.3503 3.28858   2
 -15   7   5 548.635 7.00060  -1
  15   7   0 548.635 7.00060   2
 -13   7   5 24.9646 2.13757  -1
  13   7   1 24.9646 2.13757   2
 -11   7   5 36.8668 2.22210  -1
  11   7   1 36.8668 2.22210   2
  -9   7   5 560.866 5.68280  -1
   9   7   2 560.866 5.68280   2
  -7   7   5 10.7245 1.73237  -1
   7   7   3 10.7245 1.73237   2
  -5   7   5 7.52204 2.33357  -1
   5   7   3 7.52204 2.33357   2
  -3   7   5 19.3778 1.00192  -1
   3   7   4 19.3778 1.00192   2
  -1   7   5 28.2604 2.21360  -1
   1   7   5 28.2604 2.21360   2
   1   7   5 27.6961 2.13229  -1
  -1   7   5 27.6961 2.13229   2
   3   7   5 6.38144 0.86819  -1
  -3   7   6 6.38144 0.86819   2
   5   7   5 34.4427 2.69559  -1
  -5   7   7 34.4427 2.69559   2
   7   7   5 35.9701 1.97624  -1
  -7   7   7 35.9701 1.97624   2
   9   7   5 87.4565 1.82365  -1
  -9   7   8 87.4565 1.82365   2
  11   7   5 1.75112 2.11068  -1
 -11   7   9 1.75112 2.11068   2
  13   7   5 1.31381 2.13164  -1
 -13   7   9 1.31381 2.13164   2
  15   7   5 298.188 4.19146  -1
 -15   7  10 298.188 4.19146   2
  17   7   5 19.2328 3.37908  -1
 -17   7  11 19.2328 3.37908   2
  19   7   5 4.79813 4.07922  -1
 -19   7  11 4.79813 4.07922   2
  21   7   5 126.708 4.92240  -1
 -21   7  12 126.708 4.92240   2
  23   7   5 4.96860 6.01979  -1
 -23   7  13 4.96860 6.01979   2
  25   7   5 7.27689 6.51649  -1
 -25   7  13 7.27689 6.51649   2
  27   7   5 1.57757 5.00712  -1
 -27   7  14 1.57757 5.00712   2
  29   7   5 14.3993 8.77246  -1
 -29   7  15 14.3993 8.77246   2
  31   7   5 7.79767 14.5530  -1
 -31   7  15 7.79767 14.5530   2
 -30   8   5 31.6617 7.00853  -1
 -30   8   5 31.6617 7.00853   2
 -28   8   5 6.90909 10.5169  -1
 -28   8   4 6.90909 10.5169   2
 -26   8   5 36.6081 8.99803  -1
 -26   8   4 36.6081 8.99803   2
 -24   8   5 22.1143 3.87141  -1
 -24   8   3 22.1143 3.87141   2
 -22   8   5 113.798 5.69559  -1
 -22   8   2 113.798 5.69559   2
 -20   8   5 134.757 6.14437  -1
 -20   8   2 134.757 6.14437   2
 -18   8   5 10.2626 2.46813  -1
 -18   8   1 10.2626 2.46813   2
 -16   8   5 471.078 7.92495  -1
  16   8   0 471.078 7.92495   2
 -14   8   5 511.633 6.57112  -1
  14   8   0 511.633 6.57112   2
 -12   8   5 44.3310 1.77012  -1
  12   8   1 44.3310 1.77012   2
 -10   8   5 393.489 5.59125  -1
  10   8   2 393.489 5.59125   2
  -8   8   5 211.000 3.83680  -1
   8   8   2 211.000 3.83680   2
  -6   8   5 163.542 2.55064  -1
   6   8   3 163.542 2.55064   2
  -4   8   5 71.0718 2.16632  -1
   4   8   4 71.0718 2.16632   2
  -2   8   5 212.635 3.58780  -1
   2   8   4 212.635 3.58780   2
   0   8   5 733.674 7.07214  -1
   0   8   5 733.674 7.07214   2
   2   8   5 190.855 3.38021  -1
  -2   8   6 190.855 3.38021   2
   4   8   5 136.233 3.13823  -1
  -4   8   6 136.233 3.13823   2
   6   8   5 454.103 5.37042  -1
  -6   8   7 454.103 5.37042   2
   8   8   5 321.852 5.28847  -1
  -8   8   8 321.852 5.28847   2
  10   8   5 131.138 3.27999  -1
 -10   8   8 131.138 3.27999   2
  12   8   5 11.8060 1.67485  -1
 -12   8   9 11.8060 1.67485   2
  14   8   5 179.748 4.05427  -1
 -14   8  10 179.748 4.05427   2
  16   8   5 266.614 4.93288  -1
 -16   8  10 266.614 4.93288   2
  18   8   5 24.4511 2.84605  -1
 -18   8  11 24.4511 2.84605   2
  20   8   5 126.458 6.09998  -1
 -20   8  12 126.458 6.09998   2
  22   8   5 110.931 6.50694  -1
 -22   8  12 110.931 6.50694   2
  24   8   5 14.4549 4.43988  -1
 -24   8  13 14.4549 4.43988   2
  26   8   5 44.0659 10.3029  -1
 -26   8  14 44.0659 10.3029   2
  28   8   5 38.4172 15.0972  -1
 -28   8  14 38.4172 15.0972   2
  30   8   5 9.21341 11.1222  -1
 -30   8  15 9.21341 11.1222   2
 -27   9   5 49.7622 6.23325  -1
 -27   9   4 49.7622 6.23325   2
 -25   9   5 24.0658 14.2111  -1
 -25   9   3 24.0658 14.2111   2
 -23   9   5 2.69720 5.83274  -1
 -23   9   3 2.69720 5.83274   2
 -21   9   5 56.8762 4.78040  -1
 -21   9   2 56.8762 4.78040   2
 -19   9   5 -1.6758 4.21623  -1
 -19   9   1 -1.6758 4.21623   2
 -17   9   5 16.4903 3.32271  -1
 -17   9   1 16.4903 3.32271   2
 -15   9   5 34.1728 1.92340  -1
  15   9   0 34.1728 1.92340   2
 -13   9   5 9.38804 2.60485  -1
  13   9   1 9.38804 2.60485   2
 -11   9   5 3.74426 2.67554  -1
  11   9   1 3.74426 2.67554   2
  -9   9   5 264.586 4.02108  -1
   9   9   2 264.586 4.02108   2
  -7   9   5 496.707 6.49559  -1
   7   9   3 496.707 6.49559   2
  -5   9   5 235.642 4.03264  -1
   5   9   3 235.642 4.03264   2
  -3   9   5 206.404 3.12842  -1
   3   9   4 206.404 3.12842   2
  -1   9   5 1068.81 11.6953  -1
   1   9   5 1068.81 11.6953   2
   1   9   5 1067.32 11.6744  -1
  -1   9   5 1067.32 11.6744   2
   3   9   5 227.298 3.13203  -1
  -3   9   6 227.298 3.13203   2
   5   9   5 431.705 6.71272  -1
  -5   9   7 431.705 6.71272   2
   7   9   5 510.116 7.10901  -1
  -7   9   7 510.116 7.10901   2
   9   9   5 39.7746 2.01740  -1
  -9   9   8 39.7746 2.01740   2
  11   9   5 1.30847 3.32231  -1
 -11   9   9 1.30847 3.32231   2
  13   9   5 6.97264 2.94274  -1
 -13   9   9 6.97264 2.94274   2
  15   9   5 18.4803 2.02154  -1
 -15   9  10 18.4803 2.02154   2
  17   9   5 12.1514 3.29144  -1
 -17   9  11 12.1514 3.29144   2
  19   9   5 22.7897 5.24090  -1
 -19   9  11 22.7897 5.24090   2
  21   9   5 11.1284 3.57384  -1
 -21   9  12 11.1284 3.57384   2
  23   9   5 21.0971 8.84819  -1
 -23   9  13 21.0971 8.84819   2
  25   9   5 43.6665 8.87174  -1
 -25   9  13 43.6665 8.87174   2
  27   9   5 47.9918 7.20162  -1
 -27   9  14 47.9918 7.20162   2
  29   9   5 -2.2418 14.5603  -1
 -29   9  15 -2.2418 14.5603   2
 -24  10   5 23.4209 5.51853  -1
 -24  10   3 23.4209 5.51853   2
 -22  10   5 -6.9550 7.55152  -1
 -22  10   2 -6.9550 7.55152   2
 -20  10   5 24.9865 7.32534  -1
 -20  10   2 24.9865 7.32534   2
 -18  10   5 32.9017 2.53698  -1
 -18  10   1 32.9017 2.53698   2
 -16  10   5 50.2096 3.96280  -1
  16  10   0 50.2096 3.96280   2
 -14  10   5 100.462 3.74022  -1
  14  10   0 100.462 3.74022   2
 -12  10   5 18.3184 2.02864  -1
  12  10   1 18.3184 2.02864   2
 -10  10   5 9.04079 2.76140  -1
  10  10   2 9.04079 2.76140   2
  -8  10   5 46.7579 3.00644  -1
   8  10   2 46.7579 3.00644   2
  -6  10   5 253.713 3.84045  -1
   6  10   3 253.713 3.84045   2
  -4  10   5 240.496 4.55229  -1
   4  10   4 240.496 4.55229   2
  -2  10   5 283.714 4.74599  -1
   2  10   4 283.714 4.74599   2
   0  10   5 580.755 6.53345  -1
   0  10   5 580.755 6.53345   2
   2  10   5 237.519 4.17112  -1
  -2  10   6 237.519 4.17112   2
   4  10   5 173.787 3.57625  -1
  -4  10   6 173.787 3.57625   2
   6  10   5 244.639 3.86478  -1
  -6  10   7 244.639 3.86478   2
   8  10   5 7.61617 3.02627  -1
  -8  10   8 7.61617 3.02627   2
  10  10   5 3.77865 3.01765  -1
 -10  10   8 3.77865 3.01765   2
  12  10   5 28.6533 2.44173  -1
 -12  10   9 28.6533 2.44173   2
  14  10   5 30.0755 3.87316  -1
 -14  10  10 30.0755 3.87316   2
  16  10   5 17.1989 3.34727  -1
 -16  10  10 17.1989 3.34727   2
  18  10   5 -3.6635 2.61155  -1
 -18  10  11 -3.6635 2.61155   2
  20  10   5 7.84064 4.82492  -1
 -20  10  12 7.84064 4.82492   2
  22  10   5 31.8705 7.87290  -1
 -22  10  12 31.8705 7.87290   2
  24  10   5 15.2939 5.67449  -1
 -24  10  13 15.2939 5.67449   2
  26  10   5 -7.8403 14.4544  -1
 -26  10  14 -7.8403 14.4544   2
 -27  11   5 -5.3941 10.1668  -1
 -27  11   4 -5.3941 10.1668   2
 -23  11   5 43.5047 14.6283  -1
 -23  11   3 43.5047 14.6283   2
 -21  11   5 19.9861 6.21488  -1
 -21  11   2 19.9861 6.21488   2
 -19  11   5 119.414 9.65477  -1
 -19  11   1 119.414 9.65477   2
 -17  11   5 154.368 7.28448  -1
 -17  11   1 154.368 7.28448   2
 -15  11   5 130.774 3.61369  -1
  15  11   0 130.774 3.61369   2
 -13  11   5 224.602 5.47222  -1
  13  11   1 224.602 5.47222   2
 -11  11   5 155.350 4.74958  -1
  11  11   1 155.350 4.74958   2
  -9  11   5 11.5630 2.21067  -1
   9  11   2 11.5630 2.21067   2
  -7  11   5 119.303 3.98711  -1
   7  11   3 119.303 3.98711   2
  -5  11   5 199.236 4.46859  -1
   5  11   3 199.236 4.46859   2
  -3  11   5 136.687 2.98863  -1
   3  11   4 136.687 2.98863   2
  -1  11   5 202.903 4.55221  -1
   1  11   5 202.903 4.55221   2
   1  11   5 208.454 4.19456  -1
  -1  11   5 208.454 4.19456   2
   3  11   5 107.266 2.82464  -1
  -3  11   6 107.266 2.82464   2
   5  11   5 91.9382 3.84901  -1
  -5  11   7 91.9382 3.84901   2
   7  11   5 109.830 3.60945  -1
  -7  11   7 109.830 3.60945   2
   9  11   5 2.25956 2.17427  -1
  -9  11   8 2.25956 2.17427   2
  11  11   5 111.826 5.45290  -1
 -11  11   9 111.826 5.45290   2
  13  11   5 183.302 5.74511  -1
 -13  11   9 183.302 5.74511   2
  15  11   5 79.3807 3.44422  -1
 -15  11  10 79.3807 3.44422   2
  17  11   5 57.5333 4.19943  -1
 -17  11  11 57.5333 4.19943   2
  19  11   5 71.3535 7.01098  -1
 -19  11  11 71.3535 7.01098   2
  21  11   5 26.9587 4.79197  -1
 -21  11  12 26.9587 4.79197   2
  23  11   5 18.8752 13.9955  -1
 -23  11  13 18.8752 13.9955   2
  25  11   5 13.5653 14.2147  -1
 -25  11  13 13.5653 14.2147   2
 -20  12   5 42.8996 14.4823  -1
 -20  12   2 42.8996 14.4823   2
 -18  12   5 121.808 5.31695  -1
 -18  12   1 121.808 5.31695   2
 -16  12   5 152.842 8.09674  -1
  16  12   0 152.842 8.09674   2
 -14  12   5 98.3828 5.06374  -1
  14  12   0 98.3828 5.06374   2
 -12  12   5 177.900 4.49269  -1
  12  12   1 177.900 4.49269   2
 -10  12   5 109.946 4.50848  -1
  10  12   2 109.946 4.50848   2
  -8  12   5 77.6167 5.11456  -1
   8  12   2 77.6167 5.11456   2
  -6  12   5 34.5839 2.47661  -1
   6  12   3 34.5839 2.47661   2
  -4  12   5 9.77375 3.37357  -1
   4  12   4 9.77375 3.37357   2
  -2  12   5 0.07933 3.29085  -1
   2  12   4 0.07933 3.29085   2
   0  12   5 0.23343 1.81070  -1
   0  12   5 0.23343 1.81070   2
   2  12   5 -2.0169 3.20165  -1
  -2  12   6 -2.0169 3.20165   2
   4  12   5 2.70642 3.33010  -1
  -4  12   6 2.70642 3.33010   2
   6  12   5 20.9032 2.40688  -1
  -6  12   7 20.9032 2.40688   2
   8  12   5 47.3867 4.77083  -1
  -8  12   8 47.3867 4.77083   2
  10  12   5 52.3225 4.49050  -1
 -10  12   8 52.3225 4.49050   2
  12  12   5 170.843 4.61313  -1
 -12  12   9 170.843 4.61313   2
  14  12   5 126.727 6.34361  -1
 -14  12  10 126.727 6.34361   2
  16  12   5 108.405 7.15414  -1
 -16  12  10 108.405 7.15414   2
  18  12   5 137.975 5.83119  -1
 -18  12  11 137.975 5.83119   2
  20  12   5 51.5422 14.6435  -1
 -20  12  12 51.5422 14.6435   2
  22  12   5 0.16384 14.3305  -1
 -22  12  12 0.16384 14.3305   2
 -17  13   5 124.033 16.8092  -1
 -17  13   1 124.033 16.8092   2
 -15  13   5 64.2381 4.60041  -1
  15  13   0 64.2381 4.60041   2
 -13  13   5 101.496 7.29554  -1
  13  13   1 101.496 7.29554   2
 -11  13   5 131.178 6.50666  -1
  11  13   1 131.178 6.50666   2
  -9  13   5 44.0320 3.44235  -1
   9  13   2 44.0320 3.44235   2
  -7  13   5 41.7022 4.83050  -1
   7  13   3 41.7022 4.83050   2
  -5  13   5 20.7808 5.64816  -1
   5  13   3 20.7808 5.64816   2
  -3  13   5 53.1507 2.59509  -1
   3  13   4 53.1507 2.59509   2
  -1  13   5 27.6476 3.67907  -1
   1  13   5 27.6476 3.67907   2
   1  13   5 25.7448 3.70845  -1
  -1  13   5 25.7448 3.70845   2
   3  13   5 85.7084 2.94276  -1
  -3  13   6 85.7084 2.94276   2
   5  13   5 27.5157 3.93781  -1
  -5  13   7 27.5157 3.93781   2
   7  13   5 80.2559 5.08030  -1
  -7  13   7 80.2559 5.08030   2
   9  13   5 139.131 4.63491  -1
  -9  13   8 139.131 4.63491   2
  11  13   5 81.1427 6.19291  -1
 -11  13   9 81.1427 6.19291   2
  13  13   5 99.0043 8.57673  -1
 -13  13   9 99.0043 8.57673   2
  15  13   5 88.6965 4.99001  -1
 -15  13  10 88.6965 4.99001   2
  17  13   5 92.1089 14.2302  -1
 -17  13  11 92.1089 14.2302   2
  19  13   5 72.4643 14.2623  -1
 -19  13  11 72.4643 14.2623   2
 -18  14   5 8.46948 8.76918  -1
 -18  14   1 8.46948 8.76918   2
 -14  14   5 1.94232 7.71228  -1
  14  14   0 1.94232 7.71228   2
 -12  14   5 7.27939 3.67875  -1
  12  14   1 7.27939 3.67875   2
 -10  14   5 32.6171 6.25429  -1
  10  14   2 32.6171 6.25429   2
  -8  14   5 32.4906 5.99439  -1
   8  14   2 32.4906 5.99439   2
  -6  14   5 6.24382 2.82411  -1
   6  14   3 6.24382 2.82411   2
  -4  14   5 112.118 6.23814  -1
   4  14   4 112.118 6.23814   2
  -2  14   5 177.221 6.68295  -1
   2  14   4 177.221 6.68295   2
   0  14   5 5.99198 2.55285  -1
   0  14   5 5.99198 2.55285   2
   2  14   5 158.172 6.07612  -1
  -2  14   6 158.172 6.07612   2
   4  14   5 218.622 7.25648  -1
  -4  14   6 218.622 7.25648   2
   6  14   5 17.5836 3.42221  -1
  -6  14   7 17.5836 3.42221   2
   8  14   5 63.6182 6.30729  -1
  -8  14   8 63.6182 6.30729   2
  10  14   5 49.8565 8.47755  -1
 -10  14   8 49.8565 8.47755   2
  12  14   5 2.69054 4.57382  -1
 -12  14   9 2.69054 4.57382   2
  14  14   5 25.0073 14.1029  -1
 -14  14  10 25.0073 14.1029   2
  16  14   5 15.5767 14.5859  -1
 -16  14  10 15.5767 14.5859   2
 -15  15   5 8.21600 10.4838  -1
  15  15   0 8.21600 10.4838   2
 -13  15   5 31.9505 15.6289  -1
  13  15   1 31.9505 15.6289   2
 -11  15   5 33.1619 9.91965  -1
  11  15   1 33.1619 9.91965   2
  -9  15   5 31.6881 5.19970  -1
   9  15   2 31.6881 5.19970   2
  -7  15   5 16.6488 7.47972  -1
   7  15   3 16.6488 7.47972   2
  -5  15   5 11.3004 7.10815  -1
   5  15   3 11.3004 7.10815   2
  -3  15   5 121.613 5.05428  -1
   3  15   4 121.613 5.05428   2
  -1  15   5 14.3683 5.38239  -1
   1  15   5 14.3683 5.38239   2
   1  15   5 12.9454 5.28229  -1
  -1  15   5 12.9454 5.28229   2
   3  15   5 54.8749 4.35474  -1
  -3  15   6 54.8749 4.35474   2
   5  15   5 5.86932 6.68421  -1
  -5  15   7 5.86932 6.68421   2
   7  15   5 19.8250 9.50802  -1
  -7  15   7 19.8250 9.50802   2
   9  15   5 50.1393 6.20872  -1
  -9  15   8 50.1393 6.20872   2
  11  15   5 41.0217 15.0673  -1
 -11  15   9 41.0217 15.0673   2
  -8  16   5 21.1907 13.7191  -1
   8  16   2 21.1907 13.7191   2
  -6  16   5 9.42562 6.66140  -1
   6  16   3 9.42562 6.66140   2
  -4  16   5 21.2433 10.9072  -1
   4  16   4 21.2433 10.9072   2
  -2  16   5 5.17116 10.5175  -1
   2  16   4 5.17116 10.5175   2
   0  16   5 -1.9571 6.55185  -1
   0  16   5 -1.9571 6.55185   2
   2  16   5 19.9518 10.4429  -1
  -2  16   6 19.9518 10.4429   2
   4  16   5 31.3104 14.9072  -1
  -4  16   6 31.3104 14.9072   2
 -30   0   6 47.3527 10.6989  -1
 -30   0   4 47.3527 10.6989   2
 -28   0   6 26.7608 7.69241  -1
 -28   0   3 26.7608 7.69241   2
 -26   0   6 11.0204 3.74341  -1
 -26   0   3 11.0204 3.74341   2
 -24   0   6 8.44309 2.73149  -1
 -24   0   2 8.44309 2.73149   2
 -22   0   6 11.2221 3.33044  -1
 -22   0   1 11.2221 3.33044   2
 -20   0   6 65.2757 3.46367  -1
 -20   0   1 65.2757 3.46367   2
 -18   0   6 71.1369 2.22507  -1
  18   0   0 71.1369 2.22507   2
 -16   0   6 -2.9497 2.55421  -1
  16   0   1 -2.9497 2.55421   2
 -14   0   6 136.597 4.29744  -1
  14   0   1 136.597 4.29744   2
 -12   0   6 928.169 10.7010  -1
  12   0   2 928.169 10.7010   2
 -10   0   6 908.772 18.2574  -1
  10   0   3 908.772 18.2574   2
  -8   0   6 1158.62 32.0870  -1
   8   0   3 1158.62 32.0870   2
  -6   0   6 4287.82 63.0278  -1
   6   0   4 4287.82 63.0278   2
  -4   0   6 774.138 29.4447  -1
   4   0   5 774.138 29.4447   2
  -2   0   6 3722.91 76.7258  -1
   2   0   5 3722.91 76.7258   2
   0   0   6 2230.54 47.3600  -1
   0   0   6 2230.54 47.3600   2
   2   0   6 26.1446 1.91155  -1
  -2   0   7 26.1446 1.91155   2
   4   0   6 559.233 14.8921  -1
  -4   0   7 559.233 14.8921   2
   6   0   6 1849.48 27.8274  -1
  -6   0   8 1849.48 27.8274   2
   8   0   6 236.211 8.20143  -1
  -8   0   9 236.211 8.20143   2
  10   0   6 10.2060 3.17207  -1
 -10   0   9 10.2060 3.17207   2
  12   0   6 136.894 2.68015  -1
 -12   0  10 136.894 2.68015   2
  14   0   6 9.20148 2.64979  -1
 -14   0  11 9.20148 2.64979   2
  16   0   6 -3.6487 3.17568  -1
 -16   0  11 -3.6487 3.17568   2
  18   0   6 262.351 4.61781  -1
 -18   0  12 262.351 4.61781   2
  20   0   6 16.2721 3.75982  -1
 -20   0  13 16.2721 3.75982   2
  22   0   6 7.98704 4.45344  -1
 -22   0  13 7.98704 4.45344   2
  24   0   6 158.314 5.24635  -1
 -24   0  14 158.314 5.24635   2
 -35   1   6 36.4948 15.0834  -1
 -35   1   6 36.4948 15.0834   2
 -33   1   6 28.0651 7.47815  -1
 -33   1   5 28.0651 7.47815   2
 -31   1   6 44.7775 9.20724  -1
 -31   1   4 44.7775 9.20724   2
 -29   1   6 59.0203 5.40210  -1
 -29   1   4 59.0203 5.40210   2
 -27   1   6 20.6132 2.85073  -1
 -27   1   3 20.6132 2.85073   2
 -25   1   6 6.95171 3.68761  -1
 -25   1   2 6.95171 3.68761   2
 -23   1   6 51.3656 3.23651  -1
 -23   1   2 51.3656 3.23651   2
 -21   1   6 207.528 3.16038  -1
 -21   1   1 207.528 3.16038   2
 -19   1   6 7.42165 1.89885  -1
  19   1   0 7.42165 1.89885   2
 -17   1   6 29.5778 1.76025  -1
  17   1   0 29.5778 1.76025   2
 -15   1   6 490.431 4.74901  -1
  15   1   1 490.431 4.74901   2
 -13   1   6 186.157 3.52615  -1
  13   1   2 186.157 3.52615   2
 -11   1   6 436.206 6.74781  -1
  11   1   2 436.206 6.74781   2
  -9   1   6 1051.71 10.7588  -1
   9   1   3 1051.71 10.7588   2
  -7   1   6 1653.49 30.6357  -1
   7   1   4 1653.49 30.6357   2
  -5   1   6 2517.14 45.9914  -1
   5   1   4 2517.14 45.9914   2
  -3   1   6 712.421 8.37928  -1
   3   1   5 712.421 8.37928   2
  -1   1   6 2692.61 48.5957  -1
   1   1   6 2692.61 48.5957   2
   1   1   6 2776.16 58.7532  -1
  -1   1   6 2776.16 58.7532   2
   3   1   6 122.974 1.94728  -1
  -3   1   7 122.974 1.94728   2
   5   1   6 411.590 9.61477  -1
  -5   1   8 411.590 9.61477   2
   7   1   6 450.617 8.21322  -1
  -7   1   8 450.617 8.21322   2
   9   1   6 289.561 3.10880  -1
  -9   1   9 289.561 3.10880   2
  11   1   6 94.7721 2.75454  -1
 -11   1  10 94.7721 2.75454   2
  13   1   6 125.002 3.63355  -1
 -13   1  10 125.002 3.63355   2
  15   1   6 247.409 2.86542  -1
 -15   1  11 247.409 2.86542   2
  17   1   6 27.5459 2.41249  -1
 -17   1  12 27.5459 2.41249   2
  19   1   6 2.85468 2.34523  -1
 -19   1  12 2.85468 2.34523   2
  21   1   6 121.299 3.06794  -1
 -21   1  13 121.299 3.06794   2
  23   1   6 95.2427 4.96132  -1
 -23   1  14 95.2427 4.96132   2
  25   1   6 104.326 8.54805  -1
 -25   1  14 104.326 8.54805   2
  27   1   6 61.9177 4.20778  -1
 -27   1  15 61.9177 4.20778   2
  29   1   6 55.7976 13.0637  -1
 -29   1  16 55.7976 13.0637   2
 -36   2   6 8.77988 11.6397  -1
 -36   2   6 8.77988 11.6397   2
 -34   2   6 1.02726 13.1880  -1
 -34   2   5 1.02726 13.1880   2
 -32   2   6 -1.6137 11.6398  -1
 -32   2   5 -1.6137 11.6398   2
 -30   2   6 11.7746 3.04562  -1
 -30   2   4 11.7746 3.04562   2
 -28   2   6 27.6186 4.24413  -1
 -28   2   3 27.6186 4.24413   2
 -26   2   6 61.4758 4.04809  -1
 -26   2   3 61.4758 4.04809   2
 -24   2   6 81.5490 3.08933  -1
 -24   2   2 81.5490 3.08933   2
 -22   2   6 167.576 3.94352  -1
 -22   2   1 167.576 3.94352   2
 -20   2   6 365.982 6.03016  -1
 -20   2   1 365.982 6.03016   2
 -18   2   6 231.644 3.13789  -1
  18   2   0 231.644 3.13789   2
 -16   2   6 525.309 9.06505  -1
  16   2   1 525.309 9.06505   2
 -14   2   6 772.072 11.2245  -1
  14   2   1 772.072 11.2245   2
 -12   2   6 234.244 2.55312  -1
  12   2   2 234.244 2.55312   2
 -10   2   6 124.701 2.89544  -1
  10   2   3 124.701 2.89544   2
  -8   2   6 404.481 6.41200  -1
   8   2   3 404.481 6.41200   2
  -6   2   6 406.390 4.25796  -1
   6   2   4 406.390 4.25796   2
  -4   2   6 295.029 6.47831  -1
   4   2   5 295.029 6.47831   2
  -2   2   6 928.482 37.4984  -1
   2   2   5 928.482 37.4984   2
   0   2   6 672.396 7.62895  -1
   0   2   6 672.396 7.62895   2
   2   2   6 56.4185 2.30855  -1
  -2   2   7 56.4185 2.30855   2
   4   2   6 37.8609 1.80943  -1
  -4   2   7 37.8609 1.80943   2
   6   2   6 170.887 1.99764  -1
  -6   2   8 170.887 1.99764   2
   8   2   6 605.890 7.35665  -1
  -8   2   9 605.890 7.35665   2
  10   2   6 643.550 7.84416  -1
 -10   2   9 643.550 7.84416   2
  12   2   6 294.885 3.24419  -1
 -12   2  10 294.885 3.24419   2
  14   2   6 302.769 4.77598  -1
 -14   2  11 302.769 4.77598   2
  16   2   6 350.079 6.09261  -1
 -16   2  11 350.079 6.09261   2
  18   2   6 63.5049 2.06741  -1
 -18   2  12 63.5049 2.06741   2
  20   2   6 99.2442 5.28337  -1
 -20   2  13 99.2442 5.28337   2
  22   2   6 115.662 6.06667  -1
 -22   2  13 115.662 6.06667   2
  24   2   6 13.7426 2.74323  -1
 -24   2  14 13.7426 2.74323   2
  26   2   6 23.8762 5.93375  -1
 -26   2  15 23.8762 5.93375   2
  28   2   6 2.32528 7.86328  -1
 -28   2  15 2.32528 7.86328   2
  30   2   6 -0.9801 5.38139  -1
 -30   2  16 -0.9801 5.38139   2
  32   2   6 -6.2293 13.6346  -1
 -32   2  17 -6.2293 13.6346   2
 -35   3   6 22.3730 15.3698  -1
 -35   3   6 22.3730 15.3698   2
 -33   3   6 10.0419 4.91521  -1
 -33   3   5 10.0419 4.91521   2
 -31   3   6 9.70998 8.59615  -1
 -31   3   4 9.70998 8.59615   2
 -29   3   6 21.3952 3.98564  -1
 -29   3   4 21.3952 3.98564   2
 -27   3   6 91.5236 3.69394  -1
 -27   3   3 91.5236 3.69394   2
 -25   3   6 93.5195 4.11610  -1
 -25   3   2 93.5195 4.11610   2
 -23   3   6 193.537 4.57024  -1
 -23   3   2 193.537 4.57024   2
 -21   3   6 213.342 3.63769  -1
 -21   3   1 213.342 3.63769   2
 -19   3   6 259.251 5.64038  -1
  19   3   0 259.251 5.64038   2
 -17   3   6 637.080 9.08342  -1
  17   3   0 637.080 9.08342   2
 -15   3   6 427.023 4.34414  -1
  15   3   1 427.023 4.34414   2
 -13   3   6 167.788 3.81997  -1
  13   3   2 167.788 3.81997   2
 -11   3   6 469.863 8.42330  -1
  11   3   2 469.863 8.42330   2
  -9   3   6 956.519 8.88736  -1
   9   3   3 956.519 8.88736   2
  -7   3   6 111.983 3.08966  -1
   7   3   4 111.983 3.08966   2
  -5   3   6 157.180 5.56865  -1
   5   3   4 157.180 5.56865   2
  -3   3   6 213.445 2.58907  -1
   3   3   5 213.445 2.58907   2
  -1   3   6 277.303 13.0735  -1
   1   3   6 277.303 13.0735   2
   1   3   6 271.197 6.13992  -1
  -1   3   6 271.197 6.13992   2
   3   3   6 208.968 2.46142  -1
  -3   3   7 208.968 2.46142   2
   5   3   6 273.656 4.90676  -1
  -5   3   8 273.656 4.90676   2
   7   3   6 766.465 9.08547  -1
  -7   3   8 766.465 9.08547   2
   9   3   6 494.013 4.73555  -1
  -9   3   9 494.013 4.73555   2
  11   3   6 527.348 7.04734  -1
 -11   3  10 527.348 7.04734   2
  13   3   6 212.931 3.75559  -1
 -13   3  10 212.931 3.75559   2
  15   3   6 286.057 3.88069  -1
 -15   3  11 286.057 3.88069   2
  17   3   6 244.895 4.57026  -1
 -17   3  12 244.895 4.57026   2
  19   3   6 112.960 3.63916  -1
 -19   3  12 112.960 3.63916   2
  21   3   6 52.3907 2.61750  -1
 -21   3  13 52.3907 2.61750   2
  23   3   6 18.7303 4.20665  -1
 -23   3  14 18.7303 4.20665   2
  25   3   6 23.1041 7.18785  -1
 -25   3  14 23.1041 7.18785   2
  27   3   6 2.69216 2.96643  -1
 -27   3  15 2.69216 2.96643   2
  29   3   6 1.75141 12.4904  -1
 -29   3  16 1.75141 12.4904   2
  31   3   6 5.76072 13.1534  -1
 -31   3  16 5.76072 13.1534   2
  33   3   6 -5.3459 10.3260  -1
 -33   3  17 -5.3459 10.3260   2
 -32   4   6 44.6814 10.3757  -1
 -32   4   5 44.6814 10.3757   2
 -30   4   6 30.5634 4.49435  -1
 -30   4   4 30.5634 4.49435   2
 -28   4   6 66.5925 4.67644  -1
 -28   4   3 66.5925 4.67644   2
 -26   4   6 103.359 4.45646  -1
 -26   4   3 103.359 4.45646   2
 -24   4   6 66.6366 2.71641  -1
 -24   4   2 66.6366 2.71641   2
 -22   4   6 116.485 3.48031  -1
 -22   4   1 116.485 3.48031   2
 -20   4   6 215.004 5.50491  -1
 -20   4   1 215.004 5.50491   2
 -18   4   6 261.910 3.59085  -1
  18   4   0 261.910 3.59085   2
 -16   4   6 140.155 2.67682  -1
  16   4   1 140.155 2.67682   2
 -14   4   6 345.955 6.07211  -1
  14   4   1 345.955 6.07211   2
 -12   4   6 268.282 2.74353  -1
  12   4   2 268.282 2.74353   2
 -10   4   6 576.507 9.24421  -1
  10   4   3 576.507 9.24421   2
  -8   4   6 849.411 17.4669  -1
   8   4   3 849.411 17.4669   2
  -6   4   6 767.809 6.58409  -1
   6   4   4 767.809 6.58409   2
  -4   4   6 1066.88 21.1090  -1
   4   4   5 1066.88 21.1090   2
  -2   4   6 1362.52 55.3281  -1
   2   4   5 1362.52 55.3281   2
   0   4   6 1329.63 11.5022  -1
   0   4   6 1329.63 11.5022   2
   2   4   6 1645.85 25.2416  -1
  -2   4   7 1645.85 25.2416   2
   4   4   6 683.534 10.1696  -1
  -4   4   7 683.534 10.1696   2
   6   4   6 578.579 5.06067  -1
  -6   4   8 578.579 5.06067   2
   8   4   6 557.064 6.75518  -1
  -8   4   9 557.064 6.75518   2
  10   4   6 189.157 3.06934  -1
 -10   4   9 189.157 3.06934   2
  12   4   6 20.9418 1.16669  -1
 -12   4  10 20.9418 1.16669   2
  14   4   6 67.5769 2.57129  -1
 -14   4  11 67.5769 2.57129   2
  16   4   6 249.643 4.97495  -1
 -16   4  11 249.643 4.97495   2
  18   4   6 81.4788 2.23850  -1
 -18   4  12 81.4788 2.23850   2
  20   4   6 51.4916 3.81478  -1
 -20   4  13 51.4916 3.81478   2
  22   4   6 63.8924 4.08220  -1
 -22   4  13 63.8924 4.08220   2
  24   4   6 79.5716 3.20046  -1
 -24   4  14 79.5716 3.20046   2
  26   4   6 42.1312 5.44152  -1
 -26   4  15 42.1312 5.44152   2
  28   4   6 14.3427 7.86392  -1
 -28   4  15 14.3427 7.86392   2
  30   4   6 25.4704 5.20004  -1
 -30   4  16 25.4704 5.20004   2
  32   4   6 14.7590 13.5514  -1
 -32   4  17 14.7590 13.5514   2
 -35   5   6 19.4729 17.1727  -1
 -35   5   6 19.4729 17.1727   2
 -33   5   6 66.6036 9.09819  -1
 -33   5   5 66.6036 9.09819   2
 -31   5   6 33.7745 11.2636  -1
 -31   5   4 33.7745 11.2636   2
 -29   5   6 20.3130 7.51245  -1
 -29   5   4 20.3130 7.51245   2
 -27   5   6 38.3158 4.18094  -1
 -27   5   3 38.3158 4.18094   2
 -25   5   6 -0.9379 4.24728  -1
 -25   5   2 -0.9379 4.24728   2
 -23   5   6 14.0707 4.63427  -1
 -23   5   2 14.0707 4.63427   2
 -21   5   6 11.3791 2.68293  -1
 -21   5   1 11.3791 2.68293   2
 -19   5   6 13.8406 3.72181  -1
  19   5   0 13.8406 3.72181   2
 -17   5   6 30.6828 3.27442  -1
  17   5   0 30.6828 3.27442   2
 -15   5   6 12.5019 1.29476  -1
  15   5   1 12.5019 1.29476   2
 -13   5   6 98.5558 2.70490  -1
  13   5   2 98.5558 2.70490   2
 -11   5   6 168.224 4.18596  -1
  11   5   2 168.224 4.18596   2
  -9   5   6 732.630 6.78922  -1
   9   5   3 732.630 6.78922   2
  -7   5   6 367.426 6.68038  -1
   7   5   4 367.426 6.68038   2
  -5   5   6 716.608 16.7112  -1
   5   5   4 716.608 16.7112   2
  -3   5   6 2028.50 17.7424  -1
   3   5   5 2028.50 17.7424   2
  -1   5   6 306.463 5.27008  -1
   1   5   6 306.463 5.27008   2
   1   5   6 316.191 4.70067  -1
  -1   5   6 316.191 4.70067   2
   3   5   6 596.055 5.29870  -1
  -3   5   7 596.055 5.29870   2
   5   5   6 48.9615 1.98775  -1
  -5   5   8 48.9615 1.98775   2
   7   5   6 141.792 2.70397  -1
  -7   5   8 141.792 2.70397   2
   9   5   6 69.2507 1.40288  -1
  -9   5   9 69.2507 1.40288   2
  11   5   6 96.0724 2.42594  -1
 -11   5  10 96.0724 2.42594   2
  13   5   6 59.9552 2.33971  -1
 -13   5  10 59.9552 2.33971   2
  15   5   6 20.3011 1.55872  -1
 -15   5  11 20.3011 1.55872   2
  17   5   6 3.82990 2.45799  -1
 -17   5  12 3.82990 2.45799   2
  19   5   6 6.84422 2.75501  -1
 -19   5  12 6.84422 2.75501   2
  21   5   6 26.9697 2.15143  -1
 -21   5  13 26.9697 2.15143   2
  23   5   6 41.7365 4.93379  -1
 -23   5  14 41.7365 4.93379   2
  25   5   6 21.8588 5.55026  -1
 -25   5  14 21.8588 5.55026   2
  27   5   6 59.7238 5.07295  -1
 -27   5  15 59.7238 5.07295   2
  29   5   6 19.0122 9.71766  -1
 -29   5  16 19.0122 9.71766   2
  31   5   6 2.51688 14.1377  -1
 -31   5  16 2.51688 14.1377   2
  33   5   6 3.76951 11.0639  -1
 -33   5  17 3.76951 11.0639   2
 -30   6   6 10.7548 5.96804  -1
 -30   6   4 10.7548 5.96804   2
 -28   6   6 7.05402 7.80847  -1
 -28   6   3 7.05402 7.80847   2
 -26   6   6 56.4643 5.98811  -1
 -26   6   3 56.4643 5.98811   2
 -24   6   6 171.416 5.51432  -1
 -24   6   2 171.416 5.51432   2
 -22   6   6 154.491 5.57441  -1
 -22   6   1 154.491 5.57441   2
 -20   6   6 164.173 5.91254  -1
 -20   6   1 164.173 5.91254   2
 -18   6   6 510.303 8.96541  -1
  18   6   0 510.303 8.96541   2
 -16   6   6 215.546 4.89178  -1
  16   6   1 215.546 4.89178   2
 -14   6   6 145.598 3.36702  -1
  14   6   1 145.598 3.36702   2
 -12   6   6 213.062 2.68444  -1
  12   6   2 213.062 2.68444   2
 -10   6   6 297.316 4.09395  -1
  10   6   3 297.316 4.09395   2
  -8   6   6 76.4129 2.22775  -1
   8   6   3 76.4129 2.22775   2
  -6   6   6 14.4556 0.83864  -1
   6   6   4 14.4556 0.83864   2
  -4   6   6 606.464 9.69649  -1
   4   6   5 606.464 9.69649   2
  -2   6   6 580.143 10.6069  -1
   2   6   5 580.143 10.6069   2
   0   6   6 6.17649 0.72976  -1
   0   6   6 6.17649 0.72976   2
   2   6   6 221.164 3.55741  -1
  -2   6   7 221.164 3.55741   2
   4   6   6 590.717 7.87317  -1
  -4   6   7 590.717 7.87317   2
   6   6   6 472.765 4.49694  -1
  -6   6   8 472.765 4.49694   2
   8   6   6 274.286 3.89327  -1
  -8   6   9 274.286 3.89327   2
  10   6   6 180.806 3.11772  -1
 -10   6   9 180.806 3.11772   2
  12   6   6 620.424 6.74134  -1
 -12   6  10 620.424 6.74134   2
  14   6   6 292.349 5.00167  -1
 -14   6  11 292.349 5.00167   2
  16   6   6 213.679 4.91619  -1
 -16   6  11 213.679 4.91619   2
  18   6   6 124.322 3.27276  -1
 -18   6  12 124.322 3.27276   2
  20   6   6 71.5417 4.06214  -1
 -20   6  13 71.5417 4.06214   2
  22   6   6 1.79958 4.62684  -1
 -22   6  13 1.79958 4.62684   2
  24   6   6 -1.1875 2.90629  -1
 -24   6  14 -1.1875 2.90629   2
  26   6   6 15.6131 8.56820  -1
 -26   6  15 15.6131 8.56820   2
  28   6   6 2.19896 13.3726  -1
 -28   6  15 2.19896 13.3726   2
  30   6   6 9.92125 6.24569  -1
 -30   6  16 9.92125 6.24569   2
  32   6   6 -0.6072 15.3690  -1
 -32   6  17 -0.6072 15.3690   2
 -33   7   6 -4.6678 11.1071  -1
 -33   7   5 -4.6678 11.1071   2
 -29   7   6 11.2669 9.37519  -1
 -29   7   4 11.2669 9.37519   2
 -27   7   6 45.3681 5.40377  -1
 -27   7   3 45.3681 5.40377   2
 -25   7   6 233.983 7.88723  -1
 -25   7   2 233.983 7.88723   2
 -23   7   6 367.580 10.5465  -1
 -23   7   2 367.580 10.5465   2
 -21   7   6 309.132 7.30566  -1
 -21   7   1 309.132 7.30566   2
 -19   7   6 496.306 11.0285  -1
  19   7   0 496.306 11.0285   2
 -17   7   6 729.395 10.6758  -1
  17   7   0 729.395 10.6758   2
 -15   7   6 275.141 3.75153  -1
  15   7   1 275.141 3.75153   2
 -13   7   6 340.606 4.63111  -1
  13   7   2 340.606 4.63111   2
 -11   7   6 218.123 3.58676  -1
  11   7   2 218.123 3.58676   2
  -9   7   6 2.42886 1.10051  -1
   9   7   3 2.42886 1.10051   2
  -7   7   6 5.82837 1.72499  -1
   7   7   4 5.82837 1.72499   2
  -5   7   6 27.9765 1.92796  -1
   5   7   4 27.9765 1.92796   2
  -3   7   6 7.03895 0.89020  -1
   3   7   5 7.03895 0.89020   2
  -1   7   6 28.0634 2.09698  -1
   1   7   6 28.0634 2.09698   2
   1   7   6 20.1170 1.94324  -1
  -1   7   6 20.1170 1.94324   2
   3   7   6 318.906 3.47505  -1
  -3   7   7 318.906 3.47505   2
   5   7   6 381.046 5.86450  -1
  -5   7   8 381.046 5.86450   2
   7   7   6 664.694 7.77504  -1
  -7   7   8 664.694 7.77504   2
   9   7   6 582.913 6.31609  -1
  -9   7   9 582.913 6.31609   2
  11   7   6 380.293 5.04111  -1
 -11   7  10 380.293 5.04111   2
  13   7   6 599.918 7.51346  -1
 -13   7  10 599.918 7.51346   2
  15   7   6 279.961 4.18725  -1
 -15   7  11 279.961 4.18725   2
  17   7   6 222.644 5.37568  -1
 -17   7  12 222.644 5.37568   2
  19   7   6 230.745 7.14426  -1
 -19   7  12 230.745 7.14426   2
  21   7   6 13.0960 3.04396  -1
 -21   7  13 13.0960 3.04396   2
  23   7   6 -2.3555 5.11336  -1
 -23   7  14 -2.3555 5.11336   2
  25   7   6 -4.5475 8.93623  -1
 -25   7  14 -4.5475 8.93623   2
  27   7   6 -3.2035 4.91157  -1
 -27   7  15 -3.2035 4.91157   2
  29   7   6 48.7234 14.2943  -1
 -29   7  16 48.7234 14.2943   2
  31   7   6 31.5403 15.6790  -1
 -31   7  16 31.5403 15.6790   2
 -30   8   6 11.8869 6.68041  -1
 -30   8   4 11.8869 6.68041   2
 -28   8   6 14.3598 10.6693  -1
 -28   8   3 14.3598 10.6693   2
 -26   8   6 21.7721 9.24385  -1
 -26   8   3 21.7721 9.24385   2
 -24   8   6 181.213 6.39727  -1
 -24   8   2 181.213 6.39727   2
 -22   8   6 101.516 5.49818  -1
 -22   8   1 101.516 5.49818   2
 -20   8   6 152.920 6.39846  -1
 -20   8   1 152.920 6.39846   2
 -18   8   6 374.566 6.59855  -1
  18   8   0 374.566 6.59855   2
 -16   8   6 129.925 3.56339  -1
  16   8   1 129.925 3.56339   2
 -14   8   6 82.7971 2.66737  -1
  14   8   1 82.7971 2.66737   2
 -12   8   6 240.184 3.38704  -1
  12   8   2 240.184 3.38704   2
 -10   8   6 136.535 3.35376  -1
  10   8   3 136.535 3.35376   2
  -8   8   6 63.1830 2.68688  -1
   8   8   3 63.1830 2.68688   2
  -6   8   6 41.6079 1.40391  -1
   6   8   4 41.6079 1.40391   2
  -4   8   6 137.197 2.76378  -1
   4   8   5 137.197 2.76378   2
  -2   8   6 195.548 3.46152  -1
   2   8   5 195.548 3.46152   2
   0   8   6 15.6402 1.12723  -1
   0   8   6 15.6402 1.12723   2
   2   8   6 61.0980 2.43767  -1
  -2   8   7 61.0980 2.43767   2
   4   8   6 62.1098 2.43102  -1
  -4   8   7 62.1098 2.43102   2
   6   8   6 147.006 2.43635  -1
  -6   8   8 147.006 2.43635   2
   8   8   6 124.622 3.37116  -1
  -8   8   9 124.622 3.37116   2
  10   8   6 277.639 5.07931  -1
 -10   8   9 277.639 5.07931   2
  12   8   6 336.465 4.84913  -1
 -12   8  10 336.465 4.84913   2
  14   8   6 171.919 4.03578  -1
 -14   8  11 171.919 4.03578   2
  16   8   6 137.690 3.99340  -1
 -16   8  11 137.690 3.99340   2
  18   8   6 121.885 3.72766  -1
 -18   8  12 121.885 3.72766   2
  20   8   6 16.1898 5.17978  -1
 -20   8  13 16.1898 5.17978   2
  22   8   6 6.76474 6.69886  -1
 -22   8  13 6.76474 6.69886   2
  24   8   6 10.8779 4.83929  -1
 -24   8  14 10.8779 4.83929   2
  26   8   6 10.4226 9.38634  -1
 -26   8  15 10.4226 9.38634   2
  28   8   6 41.7095 15.5543  -1
 -28   8  15 41.7095 15.5543   2
  30   8   6 -2.0659 11.3656  -1
 -30   8  16 -2.0659 11.3656   2
 -27   9   6 31.5613 5.69920  -1
 -27   9   3 31.5613 5.69920   2
 -25   9   6 11.4514 14.0680  -1
 -25   9   2 11.4514 14.0680   2
 -23   9   6 31.8522 6.19648  -1
 -23   9   2 31.8522 6.19648   2
 -21   9   6 30.2450 3.90514  -1
 -21   9   1 30.2450 3.90514   2
 -19   9   6 37.3925 4.88771  -1
  19   9   0 37.3925 4.88771   2
 -17   9   6 73.0552 3.76293  -1
  17   9   0 73.0552 3.76293   2
 -15   9   6 21.6889 1.98293  -1
  15   9   1 21.6889 1.98293   2
 -13   9   6 36.6507 2.81101  -1
  13   9   2 36.6507 2.81101   2
 -11   9   6 108.873 3.47645  -1
  11   9   2 108.873 3.47645   2
  -9   9   6 45.6486 1.95984  -1
   9   9   3 45.6486 1.95984   2
  -7   9   6 218.990 3.92141  -1
   7   9   4 218.990 3.92141   2
  -5   9   6 219.104 3.93086  -1
   5   9   4 219.104 3.93086   2
  -3   9   6 230.568 3.28391  -1
   3   9   5 230.568 3.28391   2
  -1   9   6 198.141 3.52488  -1
   1   9   6 198.141 3.52488   2
   1   9   6 206.308 3.56189  -1
  -1   9   6 206.308 3.56189   2
   3   9   6 62.0579 1.82624  -1
  -3   9   7 62.0579 1.82624   2
   5   9   6 47.9731 2.66563  -1
  -5   9   8 47.9731 2.66563   2
   7   9   6 48.2639 2.76341  -1
  -7   9   8 48.2639 2.76341   2
   9   9   6 123.352 2.90093  -1
  -9   9   9 123.352 2.90093   2
  11   9   6 68.7886 3.78304  -1
 -11   9  10 68.7886 3.78304   2
  13   9   6 37.5333 3.11550  -1
 -13   9  10 37.5333 3.11550   2
  15   9   6 60.5485 2.61762  -1
 -15   9  11 60.5485 2.61762   2
  17   9   6 2.39766 3.73572  -1
 -17   9  12 2.39766 3.73572   2
  19   9   6 32.0673 3.84988  -1
 -19   9  12 32.0673 3.84988   2
  21   9   6 10.0421 3.99664  -1
 -21   9  13 10.0421 3.99664   2
  23   9   6 -0.6240 8.65695  -1
 -23   9  14 -0.6240 8.65695   2
  25   9   6 27.5470 8.79593  -1
 -25   9  14 27.5470 8.79593   2
  27   9   6 20.4484 11.4055  -1
 -27   9  15 20.4484 11.4055   2
  29   9   6 -3.2739 15.7557  -1
 -29   9  16 -3.2739 15.7557   2
 -26  10   6 16.5428 14.7297  -1
 -26  10   3 16.5428 14.7297   2
 -24  10   6 10.3091 5.32635  -1
 -24  10   2 10.3091 5.32635   2
 -22  10   6 0.50203 7.52614  -1
 -22  10   1 0.50203 7.52614   2
 -20  10   6 20.1398 7.03235  -1
 -20  10   1 20.1398 7.03235   2
 -18  10   6 11.6405 2.49797  -1
  18  10   0 11.6405 2.49797   2
 -16  10   6 5.89121 4.25845  -1
  16  10   1 5.89121 4.25845   2
 -14  10   6 39.8191 3.30644  -1
  14  10   1 39.8191 3.30644   2
 -12  10   6 47.0309 2.35927  -1
  12  10   2 47.0309 2.35927   2
 -10  10   6 104.943 3.53045  -1
  10  10   3 104.943 3.53045   2
  -8  10   6 110.803 3.57274  -1
   8  10   3 110.803 3.57274   2
  -6  10   6 239.116 3.59222  -1
   6  10   4 239.116 3.59222   2
  -4  10   6 179.046 4.02744  -1
   4  10   5 179.046 4.02744   2
  -2  10   6 237.876 4.33195  -1
   2  10   5 237.876 4.33195   2
   0  10   6 223.073 3.33266  -1
   0  10   6 223.073 3.33266   2
   2  10   6 147.739 3.80461  -1
  -2  10   7 147.739 3.80461   2
   4  10   6 163.176 3.58654  -1
  -4  10   7 163.176 3.58654   2
   6  10   6 17.7409 1.64456  -1
  -6  10   8 17.7409 1.64456   2
   8  10   6 9.06919 2.69802  -1
  -8  10   9 9.06919 2.69802   2
  10  10   6 12.5256 3.39459  -1
 -10  10   9 12.5256 3.39459   2
  12  10   6 34.9729 2.39541  -1
 -12  10  10 34.9729 2.39541   2
  14  10   6 21.5137 3.99243  -1
 -14  10  11 21.5137 3.99243   2
  16  10   6 -2.1719 3.69674  -1
 -16  10  11 -2.1719 3.69674   2
  18  10   6 14.2329 3.01295  -1
 -18  10  12 14.2329 3.01295   2
  20  10   6 27.0902 7.21709  -1
 -20  10  13 27.0902 7.21709   2
  22  10   6 10.5142 7.78817  -1
 -22  10  13 10.5142 7.78817   2
  24  10   6 20.2473 5.58230  -1
 -24  10  14 20.2473 5.58230   2
  26  10   6 -11.410 13.3323  -1
 -26  10  15 -11.410 13.3323   2
 -27  11   6 54.8390 14.1753  -1
 -27  11   3 54.8390 14.1753   2
 -23  11   6 49.8948 14.6946  -1
 -23  11   2 49.8948 14.6946   2
 -21  11   6 65.1519 7.06030  -1
 -21  11   1 65.1519 7.06030   2
 -19  11   6 54.8611 8.73176  -1
  19  11   0 54.8611 8.73176   2
 -17  11   6 68.1977 6.06768  -1
  17  11   0 68.1977 6.06768   2
 -15  11   6 160.759 4.39163  -1
  15  11   1 160.759 4.39163   2
 -13  11   6 65.0423 4.04155  -1
  13  11   2 65.0423 4.04155   2
 -11  11   6 86.5089 4.14044  -1
  11  11   2 86.5089 4.14044   2
  -9  11   6 129.938 3.44414  -1
   9  11   3 129.938 3.44414   2
  -7  11   6 120.254 4.09765  -1
   7  11   4 120.254 4.09765   2
  -5  11   6 63.6833 3.21846  -1
   5  11   4 63.6833 3.21846   2
  -3  11   6 99.8878 2.65731  -1
   3  11   5 99.8878 2.65731   2
  -1  11   6 82.4383 3.68021  -1
   1  11   6 82.4383 3.68021   2
   1  11   6 81.7103 3.32979  -1
  -1  11   6 81.7103 3.32979   2
   3  11   6 126.075 2.95194  -1
  -3  11   7 126.075 2.95194   2
   5  11   6 91.9273 3.87472  -1
  -5  11   8 91.9273 3.87472   2
   7  11   6 57.6073 3.42527  -1
  -7  11   8 57.6073 3.42527   2
   9  11   6 117.526 3.54968  -1
  -9  11   9 117.526 3.54968   2
  11  11   6 101.737 5.77573  -1
 -11  11  10 101.737 5.77573   2
  13  11   6 92.4379 4.90638  -1
 -13  11  10 92.4379 4.90638   2
  15  11   6 35.9422 2.96490  -1
 -15  11  11 35.9422 2.96490   2
  17  11   6 58.4186 6.25755  -1
 -17  11  12 58.4186 6.25755   2
  19  11   6 43.1505 7.78086  -1
 -19  11  12 43.1505 7.78086   2
  21  11   6 6.53025 4.48172  -1
 -21  11  13 6.53025 4.48172   2
  23  11   6 -4.4996 12.8040  -1
 -23  11  14 -4.4996 12.8040   2
  25  11   6 7.27037 14.6818  -1
 -25  11  14 7.27037 14.6818   2
 -20  12   6 125.188 16.9014  -1
 -20  12   1 125.188 16.9014   2
 -18  12   6 68.8161 4.72422  -1
  18  12   0 68.8161 4.72422   2
 -16  12   6 121.352 9.71779  -1
  16  12   1 121.352 9.71779   2
 -14  12   6 146.117 5.76822  -1
  14  12   1 146.117 5.76822   2
 -12  12   6 38.7330 2.96191  -1
  12  12   2 38.7330 2.96191   2
 -10  12   6 22.5955 4.13104  -1
  10  12   3 22.5955 4.13104   2
  -8  12   6 30.0442 4.63981  -1
   8  12   3 30.0442 4.63981   2
  -6  12   6 6.11436 2.12706  -1
   6  12   4 6.11436 2.12706   2
  -4  12   6 6.94920 3.46623  -1
   4  12   5 6.94920 3.46623   2
  -2  12   6 1.36706 3.53099  -1
   2  12   5 1.36706 3.53099   2
   0  12   6 1.28489 1.77658  -1
   0  12   6 1.28489 1.77658   2
   2  12   6 8.59592 3.36297  -1
  -2  12   7 8.59592 3.36297   2
   4  12   6 40.5026 3.59016  -1
  -4  12   7 40.5026 3.59016   2
   6  12   6 49.8780 2.88815  -1
  -6  12   8 49.8780 2.88815   2
   8  12   6 112.478 5.38429  -1
  -8  12   9 112.478 5.38429   2
  10  12   6 131.060 5.77115  -1
 -10  12   9 131.060 5.77115   2
  12  12   6 66.7409 3.26563  -1
 -12  12  10 66.7409 3.26563   2
  14  12   6 74.4411 5.79699  -1
 -14  12  11 74.4411 5.79699   2
  16  12   6 98.1647 8.88030  -1
 -16  12  11 98.1647 8.88030   2
  18  12   6 14.7879 4.23469  -1
 -18  12  12 14.7879 4.23469   2
  20  12   6 12.1432 14.2051  -1
 -20  12  13 12.1432 14.2051   2
  22  12   6 9.73542 13.6867  -1
 -22  12  13 9.73542 13.6867   2
 -17  13   6 2.17799 13.2006  -1
  17  13   0 2.17799 13.2006   2
 -15  13   6 62.8409 4.92210  -1
  15  13   1 62.8409 4.92210   2
 -13  13   6 14.1631 7.83262  -1
  13  13   2 14.1631 7.83262   2
 -11  13   6 13.8530 5.94338  -1
  11  13   2 13.8530 5.94338   2
  -9  13   6 72.0291 3.72932  -1
   9  13   3 72.0291 3.72932   2
  -7  13   6 91.9076 5.82254  -1
   7  13   4 91.9076 5.82254   2
  -5  13   6 92.1907 6.18979  -1
   5  13   4 92.1907 6.18979   2
  -3  13   6 79.9964 2.86214  -1
   3  13   5 79.9964 2.86214   2
  -1  13   6 75.0972 4.06156  -1
   1  13   6 75.0972 4.06156   2
   1  13   6 71.4212 4.26016  -1
  -1  13   6 71.4212 4.26016   2
   3  13   6 22.4612 2.31965  -1
  -3  13   7 22.4612 2.31965   2
   5  13   6 5.31974 3.97669  -1
  -5  13   8 5.31974 3.97669   2
   7  13   6 23.4002 4.96060  -1
  -7  13   8 23.4002 4.96060   2
   9  13   6 7.23922 3.07867  -1
  -9  13   9 7.23922 3.07867   2
  11  13   6 12.9735 5.34334  -1
 -11  13  10 12.9735 5.34334   2
  13  13   6 30.2087 8.04694  -1
 -13  13  10 30.2087 8.04694   2
  15  13   6 18.2789 4.08446  -1
 -15  13  11 18.2789 4.08446   2
  17  13   6 -6.2617 13.7832  -1
 -17  13  12 -6.2617 13.7832   2
  19  13   6 12.9343 14.5877  -1
 -19  13  12 12.9343 14.5877   2
 -18  14   6 0.13966 8.54629  -1
  18  14   0 0.13966 8.54629   2
 -14  14   6 13.6872 8.36595  -1
  14  14   1 13.6872 8.36595   2
 -12  14   6 51.8744 4.41586  -1
  12  14   2 51.8744 4.41586   2
 -10  14   6 76.7340 6.78237  -1
  10  14   3 76.7340 6.78237   2
  -8  14   6 135.123 7.35290  -1
   8  14   3 135.123 7.35290   2
  -6  14   6 230.459 5.41196  -1
   6  14   4 230.459 5.41196   2
  -4  14   6 211.956 7.24606  -1
   4  14   5 211.956 7.24606   2
  -2  14   6 149.472 6.42529  -1
   2  14   5 149.472 6.42529   2
   0  14   6 200.657 4.69390  -1
   0  14   6 200.657 4.69390   2
   2  14   6 88.5286 5.87529  -1
  -2  14   7 88.5286 5.87529   2
   4  14   6 50.4839 5.31056  -1
  -4  14   7 50.4839 5.31056   2
   6  14   6 66.7422 4.15606  -1
  -6  14   8 66.7422 4.15606   2
   8  14   6 10.2734 5.76554  -1
  -8  14   9 10.2734 5.76554   2
  10  14   6 -5.1845 7.75086  -1
 -10  14   9 -5.1845 7.75086   2
  12  14   6 4.86533 4.08567  -1
 -12  14  10 4.86533 4.08567   2
  14  14   6 24.7032 14.8282  -1
 -14  14  11 24.7032 14.8282   2
  16  14   6 4.10834 13.4699  -1
 -16  14  11 4.10834 13.4699   2
 -15  15   6 24.4635 10.9011  -1
  15  15   1 24.4635 10.9011   2
 -13  15   6 11.9481 15.8865  -1
  13  15   2 11.9481 15.8865   2
 -11  15   6 34.3937 9.95957  -1
  11  15   2 34.3937 9.95957   2
  -9  15   6 47.3863 5.44463  -1
   9  15   3 47.3863 5.44463   2
  -7  15   6 104.031 8.25323  -1
   7  15   4 104.031 8.25323   2
  -5  15   6 168.075 8.79370  -1
   5  15   4 168.075 8.79370   2
  -3  15   6 58.0069 4.98051  -1
   3  15   5 58.0069 4.98051   2
  -1  15   6 161.544 7.55655  -1
   1  15   6 161.544 7.55655   2
   1  15   6 152.006 8.17163  -1
  -1  15   6 152.006 8.17163   2
   3  15   6 25.1965 3.89827  -1
  -3  15   7 25.1965 3.89827   2
   5  15   6 26.5029 7.18273  -1
  -5  15   8 26.5029 7.18273   2
   7  15   6 15.6170 9.70470  -1
  -7  15   8 15.6170 9.70470   2
   9  15   6 -1.3809 5.45663  -1
  -9  15   9 -1.3809 5.45663   2
  11  15   6 12.3642 13.5150  -1
 -11  15  10 12.3642 13.5150   2
  -8  16   6 2.02485 13.4124  -1
   8  16   3 2.02485 13.4124   2
  -6  16   6 30.8595 7.48257  -1
   6  16   4 30.8595 7.48257   2
  -4  16   6 22.8514 10.8498  -1
   4  16   5 22.8514 10.8498   2
  -2  16   6 38.5272 11.1916  -1
   2  16   5 38.5272 11.1916   2
   0  16   6 13.1708 6.52941  -1
   0  16   6 13.1708 6.52941   2
   2  16   6 8.71893 14.7636  -1
  -2  16   7 8.71893 14.7636   2
   4  16   6 13.6286 14.3654  -1
  -4  16   7 13.6286 14.3654   2
 -30   0   7 3.68798 8.40630  -1
 -30   0   3 3.68798 8.40630   2
 -28   0   7 0.27026 11.0908  -1
 -28   0   2 0.27026 11.0908   2
 -26   0   7 -2.9065 3.76967  -1
 -26   0   2 -2.9065 3.76967   2
 -24   0   7 0.26045 2.66606  -1
 -24   0   1 0.26045 2.66606   2
 -22   0   7 18.1762 3.52523  -1
  22   0   0 18.1762 3.52523   2
 -20   0   7 64.9168 3.52193  -1
  20   0   0 64.9168 3.52193   2
 -18   0   7 0.29019 1.40973  -1
  18   0   1 0.29019 1.40973   2
 -16   0   7 42.4427 3.21602  -1
  16   0   2 42.4427 3.21602   2
 -14   0   7 23.1985 2.80364  -1
  14   0   2 23.1985 2.80364   2
 -12   0   7 -0.6321 1.05107  -1
  12   0   3 -0.6321 1.05107   2
 -10   0   7 99.5386 4.17796  -1
  10   0   4 99.5386 4.17796   2
  -8   0   7 212.105 5.81543  -1
   8   0   4 212.105 5.81543   2
  -6   0   7 0.57663 1.05234  -1
   6   0   5 0.57663 1.05234   2
  -4   0   7 662.350 25.7479  -1
   4   0   6 662.350 25.7479   2
  -2   0   7 16.1547 2.12444  -1
   2   0   6 16.1547 2.12444   2
   0   0   7 0.00677 0.90280  -1
   0   0   7 0.00677 0.90280   2
   2   0   7 874.143 18.7377  -1
  -2   0   8 874.143 18.7377   2
   4   0   7 118.099 4.08826  -1
  -4   0   8 118.099 4.08826   2
   6   0   7 0.15464 0.91011  -1
  -6   0   9 0.15464 0.91011   2
   8   0   7 1048.43 18.7294  -1
  -8   0  10 1048.43 18.7294   2
  10   0   7 174.087 5.78815  -1
 -10   0  10 174.087 5.78815   2
  12   0   7 0.13472 1.48516  -1
 -12   0  11 0.13472 1.48516   2
  14   0   7 521.349 11.4130  -1
 -14   0  12 521.349 11.4130   2
  16   0   7 251.433 5.95583  -1
 -16   0  12 251.433 5.95583   2
  18   0   7 -0.4470 1.77324  -1
 -18   0  13 -0.4470 1.77324   2
  20   0   7 223.059 7.48450  -1
 -20   0  14 223.059 7.48450   2
  22   0   7 26.2662 4.30563  -1
 -22   0  14 26.2662 4.30563   2
  24   0   7 -5.8289 3.18746  -1
 -24   0  15 -5.8289 3.18746   2
 -35   1   7 3.97270 14.3149  -1
 -35   1   5 3.97270 14.3149   2
 -33   1   7 24.5870 10.4506  -1
 -33   1   4 24.5870 10.4506   2
 -31   1   7 4.91175 8.37138  -1
 -31   1   3 4.91175 8.37138   2
 -29   1   7 16.4151 4.97177  -1
 -29   1   3 16.4151 4.97177   2
 -27   1   7 33.6743 3.08168  -1
 -27   1   2 33.6743 3.08168   2
 -25   1   7 171.896 5.16240  -1
 -25   1   1 171.896 5.16240   2
 -23   1   7 152.994 4.23678  -1
 -23   1   1 152.994 4.23678   2
 -21   1   7 57.6221 1.83552  -1
  21   1   0 57.6221 1.83552   2
 -19   1   7 358.757 4.98378  -1
  19   1   1 358.757 4.98378   2
 -17   1   7 396.818 4.96135  -1
  17   1   1 396.818 4.96135   2
 -15   1   7 58.0492 1.28202  -1
  15   1   2 58.0492 1.28202   2
 -13   1   7 11.7709 1.76018  -1
  13   1   3 11.7709 1.76018   2
 -11   1   7 33.9375 2.00742  -1
  11   1   3 33.9375 2.00742   2
  -9   1   7 21.7621 0.86249  -1
   9   1   4 21.7621 0.86249   2
  -7   1   7 55.5614 2.26738  -1
   7   1   5 55.5614 2.26738   2
  -5   1   7 84.5528 2.47032  -1
   5   1   5 84.5528 2.47032   2
  -5   1   7 92.1448 1.41733   2
  -3   1   7 125.489 1.80101  -1
   3   1   6 125.489 1.80101   2
  -1   1   7 36.0065 1.64135  -1
   1   1   7 36.0065 1.64135   2
   1   1   7 33.6782 1.51522  -1
  -1   1   7 33.6782 1.51522   2
   3   1   7 884.242 10.3653  -1
  -3   1   8 884.242 10.3653   2
   5   1   7 250.256 4.50424  -1
  -5   1   9 250.256 4.50424   2
   7   1   7 416.889 6.76537  -1
  -7   1   9 416.889 6.76537   2
   9   1   7 800.934 7.20400  -1
  -9   1  10 800.934 7.20400   2
  11   1   7 348.716 4.80179  -1
 -11   1  11 348.716 4.80179   2
  13   1   7 330.926 5.50479  -1
 -13   1  11 330.926 5.50479   2
  15   1   7 139.013 2.01629  -1
 -15   1  12 139.013 2.01629   2
  17   1   7 19.0615 1.73315  -1
 -17   1  13 19.0615 1.73315   2
  19   1   7 207.398 4.87357  -1
 -19   1  13 207.398 4.87357   2
  21   1   7 21.5786 1.94690  -1
 -21   1  14 21.5786 1.94690   2
  23   1   7 16.2105 4.57701  -1
 -23   1  15 16.2105 4.57701   2
  25   1   7 18.9387 7.29018  -1
 -25   1  15 18.9387 7.29018   2
  27   1   7 -2.6470 3.61404  -1
 -27   1  16 -2.6470 3.61404   2
 -36   2   7 -5.0963 10.3171  -1
 -36   2   5 -5.0963 10.3171   2
 -34   2   7 11.9992 14.6432  -1
 -34   2   4 11.9992 14.6432   2
 -32   2   7 8.98467 6.85960  -1
 -32   2   4 8.98467 6.85960   2
 -30   2   7 32.7380 3.36148  -1
 -30   2   3 32.7380 3.36148   2
 -28   2   7 66.8216 4.66426  -1
 -28   2   2 66.8216 4.66426   2
 -26   2   7 143.292 4.99556  -1
 -26   2   2 143.292 4.99556   2
 -24   2   7 262.366 5.36055  -1
 -24   2   1 262.366 5.36055   2
 -22   2   7 256.335 4.90031  -1
  22   2   0 256.335 4.90031   2
 -20   2   7 464.575 6.58212  -1
  20   2   0 464.575 6.58212   2
 -18   2   7 498.259 5.25537  -1
  18   2   1 498.259 5.25537   2
 -16   2   7 151.617 3.76188  -1
  16   2   2 151.617 3.76188   2
 -14   2   7 250.976 3.86213  -1
  14   2   2 250.976 3.86213   2
 -12   2   7 10.2820 0.79586  -1
  12   2   3 10.2820 0.79586   2
 -10   2   7 135.263 3.03004  -1
  10   2   4 135.263 3.03004   2
  -8   2   7 221.676 4.03272  -1
   8   2   4 221.676 4.03272   2
  -6   2   7 416.193 4.79900  -1
   6   2   5 416.193 4.79900   2
  -4   2   7 37.3075 1.94248  -1
   4   2   6 37.3075 1.94248   2
  -2   2   7 58.3117 2.40198  -1
   2   2   6 58.3117 2.40198   2
   0   2   7 2540.78 27.6096  -1
   0   2   7 2540.78 27.6096   2
   2   2   7 969.821 16.4659  -1
  -2   2   8 969.821 16.4659   2
   4   2   7 849.398 13.4062  -1
  -4   2   8 849.398 13.4062   2
   6   2   7 632.985 6.19529  -1
  -6   2   9 632.985 6.19529   2
   8   2   7 959.261 10.8296  -1
  -8   2  10 959.261 10.8296   2
  10   2   7 881.353 10.7408  -1
 -10   2  10 881.353 10.7408   2
  12   2   7 460.489 4.83406  -1
 -12   2  11 460.489 4.83406   2
  14   2   7 108.563 2.58892  -1
 -14   2  12 108.563 2.58892   2
  16   2   7 80.2498 2.54888  -1
 -16   2  12 80.2498 2.54888   2
  18   2   7 6.03404 1.35310  -1
 -18   2  13 6.03404 1.35310   2
  20   2   7 12.3350 3.98613  -1
 -20   2  14 12.3350 3.98613   2
  22   2   7 6.14612 4.63203  -1
 -22   2  14 6.14612 4.63203   2
  24   2   7 72.2476 3.58895  -1
 -24   2  15 72.2476 3.58895   2
  26   2   7 17.9292 7.78908  -1
 -26   2  16 17.9292 7.78908   2
  28   2   7 -0.7814 8.13343  -1
 -28   2  16 -0.7814 8.13343   2
  30   2   7 11.3071 5.51865  -1
 -30   2  17 11.3071 5.51865   2
  32   2   7 10.6159 13.2618  -1
 -32   2  18 10.6159 13.2618   2
 -35   3   7 19.3447 14.4693  -1
 -35   3   5 19.3447 14.4693   2
 -33   3   7 0.97670 4.99837  -1
 -33   3   4 0.97670 4.99837   2
 -31   3   7 4.51544 8.50705  -1
 -31   3   3 4.51544 8.50705   2
 -29   3   7 48.1939 4.28674  -1
 -29   3   3 48.1939 4.28674   2
 -27   3   7 90.3974 3.69752  -1
 -27   3   2 90.3974 3.69752   2
 -25   3   7 182.644 5.19374  -1
 -25   3   1 182.644 5.19374   2
 -23   3   7 236.178 5.87683  -1
 -23   3   1 236.178 5.87683   2
 -21   3   7 292.024 4.55544  -1
  21   3   0 292.024 4.55544   2
 -19   3   7 280.962 5.55516  -1
  19   3   1 280.962 5.55516   2
 -17   3   7 233.684 4.14195  -1
  17   3   1 233.684 4.14195   2
 -15   3   7 31.9419 1.15725  -1
  15   3   2 31.9419 1.15725   2
 -13   3   7 53.7194 2.54677  -1
  13   3   3 53.7194 2.54677   2
 -11   3   7 10.1133 2.10478  -1
  11   3   3 10.1133 2.10478   2
  -9   3   7 45.4452 0.97453  -1
   9   3   4 45.4452 0.97453   2
  -7   3   7 201.371 4.18678  -1
   7   3   5 201.371 4.18678   2
  -5   3   7 96.7312 3.73765  -1
   5   3   5 96.7312 3.73765   2
  -3   3   7 215.672 2.76034  -1
   3   3   6 215.672 2.76034   2
  -1   3   7 162.144 4.16616  -1
   1   3   7 162.144 4.16616   2
   1   3   7 164.347 3.64922  -1
  -1   3   7 164.347 3.64922   2
   3   3   7 262.250 2.93964  -1
  -3   3   8 262.250 2.93964   2
   5   3   7 368.200 4.60802  -1
  -5   3   9 368.200 4.60802   2
   7   3   7 370.645 4.39034  -1
  -7   3   9 370.645 4.39034   2
   9   3   7 914.778 8.84535  -1
  -9   3  10 914.778 8.84535   2
  11   3   7 469.094 6.17825  -1
 -11   3  11 469.094 6.17825   2
  13   3   7 419.725 6.10245  -1
 -13   3  11 419.725 6.10245   2
  15   3   7 258.851 3.61324  -1
 -15   3  12 258.851 3.61324   2
  17   3   7 84.6870 3.01990  -1
 -17   3  13 84.6870 3.01990   2
  19   3   7 12.4399 3.52896  -1
 -19   3  13 12.4399 3.52896   2
  21   3   7 9.61638 2.27824  -1
 -21   3  14 9.61638 2.27824   2
  23   3   7 161.298 6.26277  -1
 -23   3  15 161.298 6.26277   2
  25   3   7 35.1116 7.53992  -1
 -25   3  15 35.1116 7.53992   2
  27   3   7 22.9336 4.36003  -1
 -27   3  16 22.9336 4.36003   2
  29   3   7 40.6937 12.5830  -1
 -29   3  17 40.6937 12.5830   2
  31   3   7 5.03464 12.5784  -1
 -31   3  17 5.03464 12.5784   2
  33   3   7 16.3086 11.5843  -1
 -33   3  18 16.3086 11.5843   2
 -32   4   7 31.4673 8.14150  -1
 -32   4   4 31.4673 8.14150   2
 -30   4   7 -0.0427 5.18996  -1
 -30   4   3 -0.0427 5.18996   2
 -28   4   7 13.9080 4.22249  -1
 -28   4   2 13.9080 4.22249   2
 -26   4   7 25.1781 3.74101  -1
 -26   4   2 25.1781 3.74101   2
 -24   4   7 57.0406 2.68725  -1
 -24   4   1 57.0406 2.68725   2
 -22   4   7 26.0097 3.05230  -1
  22   4   0 26.0097 3.05230   2
 -20   4   7 75.8079 3.09471  -1
  20   4   0 75.8079 3.09471   2
 -18   4   7 11.9056 1.47429  -1
  18   4   1 11.9056 1.47429   2
 -16   4   7 20.1111 2.02841  -1
  16   4   2 20.1111 2.02841   2
 -14   4   7 178.076 3.36104  -1
  14   4   2 178.076 3.36104   2
 -12   4   7 135.668 1.86116  -1
  12   4   3 135.668 1.86116   2
 -10   4   7 698.637 10.3189  -1
  10   4   4 698.637 10.3189   2
  -8   4   7 1248.13 22.1295  -1
   8   4   4 1248.13 22.1295   2
  -6   4   7 383.837 3.78659  -1
   6   4   5 383.837 3.78659   2
  -4   4   7 701.675 12.7532  -1
   4   4   6 701.675 12.7532   2
  -2   4   7 1702.48 44.9626  -1
   2   4   6 1702.48 44.9626   2
   0   4   7 6.31963 0.59488  -1
   0   4   7 6.31963 0.59488   2
   2   4   7 155.215 3.07227  -1
  -2   4   8 155.215 3.07227   2
   4   4   7 175.450 2.96327  -1
  -4   4   8 175.450 2.96327   2
   6   4   7 180.100 2.04358  -1
  -6   4   9 180.100 2.04358   2
   8   4   7 185.160 2.86741  -1
  -8   4  10 185.160 2.86741   2
  10   4   7 104.627 2.43804  -1
 -10   4  10 104.627 2.43804   2
  12   4   7 94.3935 1.87950  -1
 -12   4  11 94.3935 1.87950   2
  14   4   7 149.248 3.44357  -1
 -14   4  12 149.248 3.44357   2
  16   4   7 70.6333 2.67684  -1
 -16   4  12 70.6333 2.67684   2
  18   4   7 78.2444 2.29367  -1
 -18   4  13 78.2444 2.29367   2
  20   4   7 51.8689 4.42864  -1
 -20   4  14 51.8689 4.42864   2
  22   4   7 86.9618 4.93676  -1
 -22   4  14 86.9618 4.93676   2
  24   4   7 113.952 4.27657  -1
 -24   4  15 113.952 4.27657   2
  26   4   7 98.6788 10.2007  -1
 -26   4  16 98.6788 10.2007   2
  28   4   7 75.4425 13.6003  -1
 -28   4  16 75.4425 13.6003   2
  30   4   7 26.6568 5.41842  -1
 -30   4  17 26.6568 5.41842   2
  32   4   7 15.8909 13.8644  -1
 -32   4  18 15.8909 13.8644   2
 -33   5   7 16.0306 7.74977  -1
 -33   5   4 16.0306 7.74977   2
 -31   5   7 36.3303 16.9880  -1
 -31   5   3 36.3303 16.9880   2
 -29   5   7 22.1507 5.10521  -1
 -29   5   3 22.1507 5.10521   2
 -27   5   7 -1.3582 3.63573  -1
 -27   5   2 -1.3582 3.63573   2
 -25   5   7 -2.6266 3.25333  -1
 -25   5   1 -2.6266 3.25333   2
 -23   5   7 6.48966 4.61677  -1
 -23   5   1 6.48966 4.61677   2
 -21   5   7 14.5306 2.33789  -1
  21   5   0 14.5306 2.33789   2
 -19   5   7 -1.9259 3.23451  -1
  19   5   1 -1.9259 3.23451   2
 -17   5   7 96.1843 2.84804  -1
  17   5   1 96.1843 2.84804   2
 -15   5   7 125.109 2.07875  -1
  15   5   2 125.109 2.07875   2
 -13   5   7 265.289 4.42640  -1
  13   5   3 265.289 4.42640   2
 -11   5   7 544.431 7.14782  -1
  11   5   3 544.431 7.14782   2
  -9   5   7 1082.28 9.60880  -1
   9   5   4 1082.28 9.60880   2
  -7   5   7 1566.93 22.5053  -1
   7   5   5 1566.93 22.5053   2
  -5   5   7 1109.41 21.3448  -1
   5   5   5 1109.41 21.3448   2
  -3   5   7 575.951 5.23093  -1
   3   5   6 575.951 5.23093   2
  -1   5   7 1194.25 16.0934  -1
   1   5   7 1194.25 16.0934   2
   1   5   7 1194.32 14.8406  -1
  -1   5   7 1194.32 14.8406   2
   3   5   7 201.648 2.08415  -1
  -3   5   8 201.648 2.08415   2
   5   5   7 4.24393 1.79537  -1
  -5   5   9 4.24393 1.79537   2
   7   5   7 0.80415 1.69356  -1
  -7   5   9 0.80415 1.69356   2
   9   5   7 102.453 1.71198  -1
  -9   5  10 102.453 1.71198   2
  11   5   7 192.946 3.56179  -1
 -11   5  11 192.946 3.56179   2
  13   5   7 15.3237 2.13949  -1
 -13   5  11 15.3237 2.13949   2
  15   5   7 27.5518 1.79840  -1
 -15   5  12 27.5518 1.79840   2
  17   5   7 174.612 4.09275  -1
 -17   5  13 174.612 4.09275   2
  19   5   7 60.6639 3.21320  -1
 -19   5  13 60.6639 3.21320   2
  21   5   7 117.967 3.35228  -1
 -21   5  14 117.967 3.35228   2
  23   5   7 84.2720 5.62285  -1
 -23   5  15 84.2720 5.62285   2
  25   5   7 126.417 7.98323  -1
 -25   5  15 126.417 7.98323   2
  27   5   7 28.9826 4.40011  -1
 -27   5  16 28.9826 4.40011   2
  29   5   7 28.7725 13.6174  -1
 -29   5  17 28.7725 13.6174   2
  31   5   7 7.98318 14.6533  -1
 -31   5  17 7.98318 14.6533   2
 -30   6   7 6.77383 6.01591  -1
 -30   6   3 6.77383 6.01591   2
 -28   6   7 12.6998 9.06438  -1
 -28   6   2 12.6998 9.06438   2
 -26   6   7 18.1757 5.52903  -1
 -26   6   2 18.1757 5.52903   2
 -24   6   7 8.55281 3.22271  -1
 -24   6   1 8.55281 3.22271   2
 -22   6   7 63.7050 4.45993  -1
  22   6   0 63.7050 4.45993   2
 -20   6   7 51.5979 4.46528  -1
  20   6   0 51.5979 4.46528   2
 -18   6   7 47.2375 2.83966  -1
  18   6   1 47.2375 2.83966   2
 -16   6   7 71.0755 3.39142  -1
  16   6   2 71.0755 3.39142   2
 -14   6   7 122.624 3.14081  -1
  14   6   2 122.624 3.14081   2
 -12   6   7 225.185 2.89086  -1
  12   6   3 225.185 2.89086   2
 -10   6   7 330.613 4.42848  -1
  10   6   4 330.613 4.42848   2
  -8   6   7 470.031 5.71502  -1
   8   6   4 470.031 5.71502   2
  -6   6   7 684.425 5.92780  -1
   6   6   5 684.425 5.92780   2
  -4   6   7 552.750 7.93662  -1
   4   6   6 552.750 7.93662   2
  -2   6   7 216.873 4.74945  -1
   2   6   6 216.873 4.74945   2
   0   6   7 57.0330 1.18193  -1
   0   6   7 57.0330 1.18193   2
   2   6   7 236.322 3.61736  -1
  -2   6   8 236.322 3.61736   2
   4   6   7 7.36924 1.98491  -1
  -4   6   8 7.36924 1.98491   2
   6   6   7 32.6815 1.00602  -1
  -6   6   9 32.6815 1.00602   2
   8   6   7 11.4666 1.78372  -1
  -8   6  10 11.4666 1.78372   2
  10   6   7 11.2958 1.95620  -1
 -10   6  10 11.2958 1.95620   2
  12   6   7 86.3973 1.90393  -1
 -12   6  11 86.3973 1.90393   2
  14   6   7 14.1396 2.52398  -1
 -14   6  12 14.1396 2.52398   2
  16   6   7 63.0563 3.15195  -1
 -16   6  12 63.0563 3.15195   2
  18   6   7 75.8316 2.59438  -1
 -18   6  13 75.8316 2.59438   2
  20   6   7 81.7817 3.66957  -1
 -20   6  14 81.7817 3.66957   2
  22   6   7 34.0842 4.09916  -1
 -22   6  14 34.0842 4.09916   2
  24   6   7 33.1993 3.40086  -1
 -24   6  15 33.1993 3.40086   2
  26   6   7 35.8042 9.37836  -1
 -26   6  16 35.8042 9.37836   2
  28   6   7 21.0868 13.8352  -1
 -28   6  16 21.0868 13.8352   2
  30   6   7 -1.2696 10.2856  -1
 -30   6  17 -1.2696 10.2856   2
 -33   7   7 -3.9568 11.9769  -1
 -33   7   4 -3.9568 11.9769   2
 -29   7   7 14.0339 9.47315  -1
 -29   7   3 14.0339 9.47315   2
 -27   7   7 52.3421 5.62486  -1
 -27   7   2 52.3421 5.62486   2
 -25   7   7 17.1546 4.92497  -1
 -25   7   1 17.1546 4.92497   2
 -23   7   7 9.26806 6.11040  -1
 -23   7   1 9.26806 6.11040   2
 -21   7   7 137.916 4.79384  -1
  21   7   0 137.916 4.79384   2
 -19   7   7 24.1970 3.87588  -1
  19   7   1 24.1970 3.87588   2
 -17   7   7 7.27874 2.69848  -1
  17   7   1 7.27874 2.69848   2
 -15   7   7 30.9831 1.75663  -1
  15   7   2 30.9831 1.75663   2
 -13   7   7 23.3065 2.18307  -1
  13   7   3 23.3065 2.18307   2
 -11   7   7 22.3828 2.24602  -1
  11   7   3 22.3828 2.24602   2
  -9   7   7 89.0107 1.71283  -1
   9   7   4 89.0107 1.71283   2
  -7   7   7 35.6759 1.92342  -1
   7   7   5 35.6759 1.92342   2
  -5   7   7 29.6004 1.91727  -1
   5   7   5 29.6004 1.91727   2
  -3   7   7 337.440 3.57086  -1
   3   7   6 337.440 3.57086   2
  -1   7   7 66.2769 2.59413  -1
   1   7   7 66.2769 2.59413   2
   1   7   7 69.5153 2.29772  -1
  -1   7   7 69.5153 2.29772   2
   3   7   7 75.3117 1.48450  -1
  -3   7   8 75.3117 1.48450   2
   5   7   7 30.1905 2.42319  -1
  -5   7   9 30.1905 2.42319   2
   7   7   7 8.66922 2.08801  -1
  -7   7   9 8.66922 2.08801   2
   9   7   7 4.89304 1.36098  -1
  -9   7  10 4.89304 1.36098   2
  11   7   7 83.9014 2.82232  -1
 -11   7  11 83.9014 2.82232   2
  13   7   7 22.9422 2.64391  -1
 -13   7  11 22.9422 2.64391   2
  15   7   7 32.1693 1.93663  -1
 -15   7  12 32.1693 1.93663   2
  17   7   7 31.8850 3.37227  -1
 -17   7  13 31.8850 3.37227   2
  19   7   7 9.31616 3.33649  -1
 -19   7  13 9.31616 3.33649   2
  21   7   7 7.34316 2.39907  -1
 -21   7  14 7.34316 2.39907   2
  23   7   7 10.4769 5.11949  -1
 -23   7  15 10.4769 5.11949   2
  25   7   7 10.5926 9.22079  -1
 -25   7  15 10.5926 9.22079   2
  27   7   7 35.0459 5.57110  -1
 -27   7  16 35.0459 5.57110   2
  29   7   7 5.49285 13.6950  -1
 -29   7  17 5.49285 13.6950   2
  31   7   7 -10.239 15.9980  -1
 -31   7  17 -10.239 15.9980   2
 -30   8   7 -5.2180 6.46903  -1
 -30   8   3 -5.2180 6.46903   2
 -28   8   7 35.6128 10.6884  -1
 -28   8   2 35.6128 10.6884   2
 -26   8   7 73.3837 10.0765  -1
 -26   8   2 73.3837 10.0765   2
 -24   8   7 14.3545 4.05330  -1
 -24   8   1 14.3545 4.05330   2
 -22   8   7 62.1378 5.10710  -1
  22   8   0 62.1378 5.10710   2
 -20   8   7 125.446 5.93897  -1
  20   8   0 125.446 5.93897   2
 -18   8   7 4.37775 2.35758  -1
  18   8   1 4.37775 2.35758   2
 -16   8   7 47.4988 2.93047  -1
  16   8   2 47.4988 2.93047   2
 -14   8   7 132.495 3.23811  -1
  14   8   2 132.495 3.23811   2
 -12   8   7 115.537 2.42544  -1
  12   8   3 115.537 2.42544   2
 -10   8   7 27.9252 2.66113  -1
  10   8   4 27.9252 2.66113   2
  -8   8   7 173.913 3.44287  -1
   8   8   4 173.913 3.44287   2
  -6   8   7 459.021 4.92355  -1
   6   8   5 459.021 4.92355   2
  -4   8   7 60.4405 2.15634  -1
   4   8   6 60.4405 2.15634   2
  -2   8   7 56.2261 2.45680  -1
   2   8   6 56.2261 2.45680   2
   0   8   7 124.427 2.05503  -1
   0   8   7 124.427 2.05503   2
   2   8   7 30.8958 2.35633  -1
  -2   8   8 30.8958 2.35633   2
   4   8   7 49.1306 2.40102  -1
  -4   8   8 49.1306 2.40102   2
   6   8   7 11.6917 1.23677  -1
  -6   8   9 11.6917 1.23677   2
   8   8   7 76.9877 3.46040  -1
  -8   8  10 76.9877 3.46040   2
  10   8   7 217.385 4.32280  -1
 -10   8  10 217.385 4.32280   2
  12   8   7 29.6204 2.02906  -1
 -12   8  11 29.6204 2.02906   2
  14   8   7 36.7867 3.70766  -1
 -14   8  12 36.7867 3.70766   2
  16   8   7 101.189 3.99666  -1
 -16   8  12 101.189 3.99666   2
  18   8   7 46.6449 2.39497  -1
 -18   8  13 46.6449 2.39497   2
  20   8   7 28.5114 4.32522  -1
 -20   8  14 28.5114 4.32522   2
  22   8   7 15.0461 8.49984  -1
 -22   8  14 15.0461 8.49984   2
  24   8   7 18.5646 4.94625  -1
 -24   8  15 18.5646 4.94625   2
  26   8   7 58.1077 10.5375  -1
 -26   8  16 58.1077 10.5375   2
  28   8   7 6.35258 14.0414  -1
 -28   8  16 6.35258 14.0414   2
  30   8   7 12.2342 11.3334  -1
 -30   8  17 12.2342 11.3334   2
 -27   9   7 27.6283 5.66467  -1
 -27   9   2 27.6283 5.66467   2
 -25   9   7 6.21803 14.0216  -1
 -25   9   1 6.21803 14.0216   2
 -23   9   7 13.6610 6.61985  -1
 -23   9   1 13.6610 6.61985   2
 -21   9   7 11.9946 3.84379  -1
  21   9   0 11.9946 3.84379   2
 -19   9   7 18.5338 4.74498  -1
  19   9   1 18.5338 4.74498   2
 -17   9   7 22.8638 3.42009  -1
  17   9   1 22.8638 3.42009   2
 -15   9   7 41.6789 2.28632  -1
  15   9   2 41.6789 2.28632   2
 -13   9   7 73.8128 3.38797  -1
  13   9   3 73.8128 3.38797   2
 -11   9   7 163.025 3.98550  -1
  11   9   3 163.025 3.98550   2
  -9   9   7 264.906 4.04602  -1
   9   9   4 264.906 4.04602   2
  -7   9   7 497.235 6.54502  -1
   7   9   5 497.235 6.54502   2
  -5   9   7 432.199 6.05003  -1
   5   9   5 432.199 6.05003   2
  -3   9   7 56.2009 1.74292  -1
   3   9   6 56.2009 1.74292   2
  -1   9   7 175.266 3.36540  -1
   1   9   7 175.266 3.36540   2
   1   9   7 171.901 3.52678  -1
  -1   9   7 171.901 3.52678   2
   3   9   7 4.69302 1.35051  -1
  -3   9   8 4.69302 1.35051   2
   5   9   7 55.5523 2.82652  -1
  -5   9   9 55.5523 2.82652   2
   7   9   7 32.3183 2.44262  -1
  -7   9   9 32.3183 2.44262   2
   9   9   7 3.05224 1.74206  -1
  -9   9  10 3.05224 1.74206   2
  11   9   7 209.722 5.50236  -1
 -11   9  11 209.722 5.50236   2
  13   9   7 89.2396 3.92606  -1
 -13   9  11 89.2396 3.92606   2
  15   9   7 3.19354 2.11640  -1
 -15   9  12 3.19354 2.11640   2
  17   9   7 70.3165 4.53266  -1
 -17   9  13 70.3165 4.53266   2
  19   9   7 50.3989 5.10975  -1
 -19   9  13 50.3989 5.10975   2
  21   9   7 28.3594 4.32077  -1
 -21   9  14 28.3594 4.32077   2
  23   9   7 2.67418 8.75990  -1
 -23   9  15 2.67418 8.75990   2
  25   9   7 24.4389 10.4620  -1
 -25   9  15 24.4389 10.4620   2
  27   9   7 7.58684 11.4217  -1
 -27   9  16 7.58684 11.4217   2
 -26  10   7 -12.965 14.0651  -1
 -26  10   2 -12.965 14.0651   2
 -24  10   7 4.21541 5.08334  -1
 -24  10   1 4.21541 5.08334   2
 -22  10   7 19.5608 10.3180  -1
  22  10   0 19.5608 10.3180   2
 -20  10   7 34.2180 9.20624  -1
  20  10   0 34.2180 9.20624   2
 -18  10   7 -1.3269 2.67017  -1
  18  10   1 -1.3269 2.67017   2
 -16  10   7 12.4542 3.89804  -1
  16  10   2 12.4542 3.89804   2
 -14  10   7 24.6424 3.46375  -1
  14  10   2 24.6424 3.46375   2
 -12  10   7 128.467 3.18551  -1
  12  10   3 128.467 3.18551   2
 -10  10   7 86.3923 3.44372  -1
  10  10   4 86.3923 3.44372   2
  -8  10   7 259.957 4.92974  -1
   8  10   4 259.957 4.92974   2
  -6  10   7 243.389 3.75439  -1
   6  10   5 243.389 3.75439   2
  -4  10   7 161.933 3.75461  -1
   4  10   6 161.933 3.75461   2
  -2  10   7 159.872 3.88296  -1
   2  10   6 159.872 3.88296   2
   0  10   7 7.03281 1.54459  -1
   0  10   7 7.03281 1.54459   2
   2  10   7 4.04545 2.97418  -1
  -2  10   8 4.04545 2.97418   2
   4  10   7 28.7663 2.84716  -1
  -4  10   8 28.7663 2.84716   2
   6  10   7 33.4239 2.04249  -1
  -6  10   9 33.4239 2.04249   2
   8  10   7 117.947 4.03408  -1
  -8  10  10 117.947 4.03408   2
  10  10   7 78.4203 4.10986  -1
 -10  10  10 78.4203 4.10986   2
  12  10   7 81.2757 3.00562  -1
 -12  10  11 81.2757 3.00562   2
  14  10   7 72.7487 4.55917  -1
 -14  10  12 72.7487 4.55917   2
  16  10   7 26.3467 5.26001  -1
 -16  10  12 26.3467 5.26001   2
  18  10   7 18.4547 3.11740  -1
 -18  10  13 18.4547 3.11740   2
  20  10   7 10.2261 7.20981  -1
 -20  10  14 10.2261 7.20981   2
  22  10   7 28.7290 8.14247  -1
 -22  10  14 28.7290 8.14247   2
  24  10   7 26.7840 6.74909  -1
 -24  10  15 26.7840 6.74909   2
  26  10   7 19.5165 15.3201  -1
 -26  10  16 19.5165 15.3201   2
 -27  11   7 24.2916 14.7912  -1
 -27  11   2 24.2916 14.7912   2
 -23  11   7 19.6216 13.5652  -1
 -23  11   1 19.6216 13.5652   2
 -21  11   7 46.7571 6.64072  -1
  21  11   0 46.7571 6.64072   2
 -19  11   7 38.6607 6.40077  -1
  19  11   1 38.6607 6.40077   2
 -17  11   7 31.5598 5.40253  -1
  17  11   1 31.5598 5.40253   2
 -15  11   7 3.95177 2.65645  -1
  15  11   2 3.95177 2.65645   2
 -13  11   7 15.1879 3.94083  -1
  13  11   3 15.1879 3.94083   2
 -11  11   7 66.9020 4.32104  -1
  11  11   3 66.9020 4.32104   2
  -9  11   7 108.232 3.26433  -1
   9  11   4 108.232 3.26433   2
  -7  11   7 97.2281 4.45556  -1
   7  11   5 97.2281 4.45556   2
  -5  11   7 87.9167 3.58109  -1
   5  11   5 87.9167 3.58109   2
  -3  11   7 119.316 2.74247  -1
   3  11   6 119.316 2.74247   2
  -1  11   7 14.0953 3.23936  -1
   1  11   7 14.0953 3.23936   2
   1  11   7 12.6616 3.34860  -1
  -1  11   7 12.6616 3.34860   2
   3  11   7 19.5611 1.90574  -1
  -3  11   8 19.5611 1.90574   2
   5  11   7 54.8504 3.52200  -1
  -5  11   9 54.8504 3.52200   2
   7  11   7 119.073 4.29766  -1
  -7  11   9 119.073 4.29766   2
   9  11   7 158.481 3.99161  -1
  -9  11  10 158.481 3.99161   2
  11  11   7 44.6832 5.06719  -1
 -11  11  11 44.6832 5.06719   2
  13  11   7 28.5430 4.49159  -1
 -13  11  11 28.5430 4.49159   2
  15  11   7 43.8591 3.33487  -1
 -15  11  12 43.8591 3.33487   2
  17  11   7 -4.2556 6.53746  -1
 -17  11  13 -4.2556 6.53746   2
  19  11   7 -0.2234 5.60606  -1
 -19  11  13 -0.2234 5.60606   2
  21  11   7 16.6403 4.75485  -1
 -21  11  14 16.6403 4.75485   2
  23  11   7 14.8027 13.9564  -1
 -23  11  15 14.8027 13.9564   2
 -20  12   7 40.2797 10.6127  -1
  20  12   0 40.2797 10.6127   2
 -18  12   7 108.055 5.95845  -1
  18  12   1 108.055 5.95845   2
 -16  12   7 44.3708 6.92893  -1
  16  12   2 44.3708 6.92893   2
 -14  12   7 17.3011 4.60973  -1
  14  12   2 17.3011 4.60973   2
 -12  12   7 10.5600 2.65141  -1
  12  12   3 10.5600 2.65141   2
 -10  12   7 15.4012 4.33475  -1
  10  12   4 15.4012 4.33475   2
  -8  12   7 0.38685 4.23686  -1
   8  12   4 0.38685 4.23686   2
  -6  12   7 20.2586 2.38544  -1
   6  12   5 20.2586 2.38544   2
  -4  12   7 38.4887 3.78610  -1
   4  12   6 38.4887 3.78610   2
  -2  12   7 9.22674 3.61695  -1
   2  12   6 9.22674 3.61695   2
   0  12   7 18.0515 2.01123  -1
   0  12   7 18.0515 2.01123   2
   2  12   7 74.9272 4.08727  -1
  -2  12   8 74.9272 4.08727   2
   4  12   7 72.1234 4.02601  -1
  -4  12   8 72.1234 4.02601   2
   6  12   7 114.105 3.61935  -1
  -6  12   9 114.105 3.61935   2
   8  12   7 122.464 5.62165  -1
  -8  12  10 122.464 5.62165   2
  10  12   7 128.934 5.72036  -1
 -10  12  10 128.934 5.72036   2
  12  12   7 106.312 4.06869  -1
 -12  12  11 106.312 4.06869   2
  14  12   7 26.4048 5.92840  -1
 -14  12  12 26.4048 5.92840   2
  16  12   7 15.2753 7.78407  -1
 -16  12  12 15.2753 7.78407   2
  18  12   7 9.52312 4.64526  -1
 -18  12  13 9.52312 4.64526   2
  20  12   7 -9.4191 13.2060  -1
 -20  12  14 -9.4191 13.2060   2
  22  12   7 -0.9139 15.0657  -1
 -22  12  14 -0.9139 15.0657   2
 -17  13   7 67.0178 15.3630  -1
  17  13   1 67.0178 15.3630   2
 -15  13   7 29.3327 4.92932  -1
  15  13   2 29.3327 4.92932   2
 -13  13   7 15.6768 7.91895  -1
  13  13   3 15.6768 7.91895   2
 -11  13   7 0.73168 5.82544  -1
  11  13   3 0.73168 5.82544   2
  -9  13   7 10.4602 2.90572  -1
   9  13   4 10.4602 2.90572   2
  -7  13   7 81.9070 6.05218  -1
   7  13   5 81.9070 6.05218   2
  -5  13   7 27.8985 4.94070  -1
   5  13   5 27.8985 4.94070   2
  -3  13   7 22.2946 2.38944  -1
   3  13   6 22.2946 2.38944   2
  -1  13   7 79.4906 4.31868  -1
   1  13   7 79.4906 4.31868   2
   1  13   7 80.5250 4.54938  -1
  -1  13   7 80.5250 4.54938   2
   3  13   7 71.0966 2.91110  -1
  -3  13   8 71.0966 2.91110   2
   5  13   7 79.4012 4.61975  -1
  -5  13   9 79.4012 4.61975   2
   7  13   7 81.1955 5.50414  -1
  -7  13   9 81.1955 5.50414   2
   9  13   7 92.1297 4.38897  -1
  -9  13  10 92.1297 4.38897   2
  11  13   7 50.0345 6.09793  -1
 -11  13  11 50.0345 6.09793   2
  13  13   7 47.9648 7.99824  -1
 -13  13  11 47.9648 7.99824   2
  15  13   7 18.9666 4.73903  -1
 -15  13  12 18.9666 4.73903   2
  17  13   7 -2.9089 14.2589  -1
 -17  13  13 -2.9089 14.2589   2
  19  13   7 -12.051 14.6768  -1
 -19  13  13 -12.051 14.6768   2
 -14  14   7 9.40788 10.3469  -1
  14  14   2 9.40788 10.3469   2
 -12  14   7 0.21266 4.31423  -1
  12  14   3 0.21266 4.31423   2
 -10  14   7 35.6158 6.87708  -1
  10  14   4 35.6158 6.87708   2
  -8  14   7 81.7676 6.89535  -1
   8  14   4 81.7676 6.89535   2
  -6  14   7 13.8819 2.94099  -1
   6  14   5 13.8819 2.94099   2
  -4  14   7 46.9683 6.15511  -1
   4  14   6 46.9683 6.15511   2
  -2  14   7 97.4960 6.42006  -1
   2  14   6 97.4960 6.42006   2
   0  14   7 20.3419 2.89079  -1
   0  14   7 20.3419 2.89079   2
   2  14   7 9.52702 5.66431  -1
  -2  14   8 9.52702 5.66431   2
   4  14   7 21.5475 5.22246  -1
  -4  14   8 21.5475 5.22246   2
   6  14   7 3.54661 3.28972  -1
  -6  14   9 3.54661 3.28972   2
   8  14   7 22.4354 6.08320  -1
  -8  14  10 22.4354 6.08320   2
  10  14   7 0.22123 10.0714  -1
 -10  14  10 0.22123 10.0714   2
  12  14   7 -1.8329 4.56377  -1
 -12  14  11 -1.8329 4.56377   2
  14  14   7 27.4433 15.1854  -1
 -14  14  12 27.4433 15.1854   2
 -15  15   7 21.7666 9.95636  -1
  15  15   2 21.7666 9.95636   2
 -13  15   7 13.6694 14.2938  -1
  13  15   3 13.6694 14.2938   2
 -11  15   7 16.9960 15.1655  -1
  11  15   3 16.9960 15.1655   2
  -9  15   7 20.7729 4.98110  -1
   9  15   4 20.7729 4.98110   2
  -7  15   7 18.7352 8.49372  -1
   7  15   5 18.7352 8.49372   2
  -5  15   7 11.4819 7.81961  -1
   5  15   5 11.4819 7.81961   2
  -3  15   7 28.6054 4.83075  -1
   3  15   6 28.6054 4.83075   2
  -1  15   7 18.4163 6.98577  -1
   1  15   7 18.4163 6.98577   2
   1  15   7 9.29301 6.46619  -1
  -1  15   7 9.29301 6.46619   2
   3  15   7 18.5029 4.12303  -1
  -3  15   8 18.5029 4.12303   2
   5  15   7 29.3971 6.85997  -1
  -5  15   9 29.3971 6.85997   2
   7  15   7 25.7807 10.0393  -1
  -7  15   9 25.7807 10.0393   2
   9  15   7 17.8001 6.43297  -1
  -9  15  10 17.8001 6.43297   2
  -8  16   7 3.34713 13.4113  -1
   8  16   4 3.34713 13.4113   2
  -6  16   7 11.8257 6.86116  -1
   6  16   5 11.8257 6.86116   2
  -4  16   7 -3.9800 10.1781  -1
   4  16   6 -3.9800 10.1781   2
  -2  16   7 12.8295 11.0121  -1
   2  16   6 12.8295 11.0121   2
   0  16   7 57.6010 8.01372  -1
   0  16   7 57.6010 8.01372   2
   2  16   7 27.5735 14.2395  -1
  -2  16   8 27.5735 14.2395   2
 -32   0   8 -3.0792 12.7053  -1
 -32   0   3 -3.0792 12.7053   2
 -30   0   8 4.67463 8.38577  -1
 -30   0   2 4.67463 8.38577   2
 -28   0   8 73.1641 12.7130  -1
 -28   0   1 73.1641 12.7130   2
 -26   0   8 78.3353 4.84452  -1
 -26   0   1 78.3353 4.84452   2
 -24   0   8 166.654 5.22876  -1
  24   0   0 166.654 5.22876   2
 -22   0   8 88.2288 4.60581  -1
  22   0   1 88.2288 4.60581   2
 -20   0   8 2.11621 3.01533  -1
  20   0   1 2.11621 3.01533   2
 -18   0   8 266.627 4.31361  -1
  18   0   2 266.627 4.31361   2
 -16   0   8 45.9516 3.00692  -1
  16   0   3 45.9516 3.00692   2
 -14   0   8 183.262 5.30487  -1
  14   0   3 183.262 5.30487   2
 -12   0   8 211.189 3.08148  -1
  12   0   4 211.189 3.08148   2
 -10   0   8 195.675 5.39692  -1
  10   0   5 195.675 5.39692   2
  -8   0   8 279.426 9.64296  -1
   8   0   5 279.426 9.64296   2
  -6   0   8 1687.34 27.7011  -1
   6   0   6 1687.34 27.7011   2
  -4   0   8 103.478 3.05497  -1
   4   0   7 103.478 3.05497   2
  -2   0   8 763.991 14.2465  -1
   2   0   7 763.991 14.2465   2
   0   0   8 1068.80 17.5891  -1
   0   0   8 1068.80 17.5891   2
   2   0   8 7.85113 1.86688  -1
  -2   0   9 7.85113 1.86688   2
   4   0   8 114.781 3.70494  -1
  -4   0   9 114.781 3.70494   2
   6   0   8 2129.16 30.2927  -1
  -6   0  10 2129.16 30.2927   2
   8   0   8 48.1870 2.26851  -1
  -8   0  11 48.1870 2.26851   2
  10   0   8 441.181 11.3314  -1
 -10   0  11 441.181 11.3314   2
  12   0   8 1274.17 19.7917  -1
 -12   0  12 1274.17 19.7917   2
  14   0   8 -4.9138 3.01012  -1
 -14   0  13 -4.9138 3.01012   2
  16   0   8 7.46910 2.88883  -1
 -16   0  13 7.46910 2.88883   2
  18   0   8 125.581 3.49410  -1
 -18   0  14 125.581 3.49410   2
  20   0   8 103.290 4.65761  -1
 -20   0  15 103.290 4.65761   2
  22   0   8 46.2185 7.03045   2
  22   0   8 35.9259 5.11759  -1
 -22   0  15 35.9259 5.11759   2
  24   0   8 20.8848 3.70536  -1
 -24   0  16 20.8848 3.70536   2
 -35   1   8 13.8791 13.8163  -1
 -35   1   4 13.8791 13.8163   2
 -33   1   8 7.97464 9.85179  -1
 -33   1   3 7.97464 9.85179   2
 -31   1   8 8.19600 12.0838  -1
 -31   1   2 8.19600 12.0838   2
 -29   1   8 12.7601 4.95137  -1
 -29   1   2 12.7601 4.95137   2
 -27   1   8 83.0890 3.64545  -1
 -27   1   1 83.0890 3.64545   2
 -25   1   8 68.8046 4.35503  -1
  25   1   0 68.8046 4.35503   2
 -23   1   8 28.4355 2.49775  -1
  23   1   0 28.4355 2.49775   2
 -21   1   8 81.8426 2.13195  -1
  21   1   1 81.8426 2.13195   2
 -19   1   8 3.04542 2.12521  -1
  19   1   2 3.04542 2.12521   2
 -17   1   8 17.4783 1.84658  -1
  17   1   2 17.4783 1.84658   2
 -15   1   8 231.506 2.51967  -1
  15   1   3 231.506 2.51967   2
 -13   1   8 254.168 4.07955  -1
  13   1   4 254.168 4.07955   2
 -11   1   8 414.443 6.05143  -1
  11   1   4 414.443 6.05143   2
  -9   1   8 324.630 3.40588  -1
   9   1   5 324.630 3.40588   2
  -7   1   8 437.262 7.62637  -1
   7   1   6 437.262 7.62637   2
  -5   1   8 389.665 6.56396  -1
   5   1   6 389.665 6.56396   2
  -3   1   8 905.932 10.6250  -1
   3   1   7 905.932 10.6250   2
  -1   1   8 230.887 4.62035  -1
   1   1   8 230.887 4.62035   2
   1   1   8 222.863 4.05450  -1
  -1   1   8 222.863 4.05450   2
   3   1   8 1275.21 13.0970  -1
  -3   1   9 1275.21 13.0970   2
   5   1   8 1266.23 14.5033  -1
  -5   1  10 1266.23 14.5033   2
   7   1   8 636.007 7.43597  -1
  -7   1  10 636.007 7.43597   2
   9   1   8 89.9020 1.42653  -1
  -9   1  11 89.9020 1.42653   2
  11   1   8 528.133 6.72051  -1
 -11   1  12 528.133 6.72051   2
  13   1   8 434.812 7.29724  -1
 -13   1  12 434.812 7.29724   2
  15   1   8 43.5668 1.28967  -1
 -15   1  13 43.5668 1.28967   2
  17   1   8 90.1296 3.15889  -1
 -17   1  14 90.1296 3.15889   2
  19   1   8 162.484 5.19390  -1
 -19   1  14 162.484 5.19390   2
  21   1   8 97.0699 3.06157  -1
 -21   1  15 97.0699 3.06157   2
  23   1   8 40.8676 4.97738  -1
 -23   1  16 40.8676 4.97738   2
  25   1   8 28.6066 7.61171  -1
 -25   1  16 28.6066 7.61171   2
  27   1   8 28.4498 4.14766  -1
 -27   1  17 28.4498 4.14766   2
 -36   2   8 8.61164 11.0324  -1
 -36   2   4 8.61164 11.0324   2
 -34   2   8 10.2922 13.7521  -1
 -34   2   3 10.2922 13.7521   2
 -32   2   8 3.24982 8.62385  -1
 -32   2   3 3.24982 8.62385   2
 -30   2   8 5.43386 3.07918  -1
 -30   2   2 5.43386 3.07918   2
 -28   2   8 72.2831 5.98720  -1
 -28   2   1 72.2831 5.98720   2
 -26   2   8 98.8001 4.76072  -1
 -26   2   1 98.8001 4.76072   2
 -24   2   8 13.8722 2.28371  -1
  24   2   0 13.8722 2.28371   2
 -22   2   8 107.735 3.58509  -1
  22   2   1 107.735 3.58509   2
 -20   2   8 70.3263 3.00583  -1
  20   2   1 70.3263 3.00583   2
 -18   2   8 22.1060 1.16809  -1
  18   2   2 22.1060 1.16809   2
 -16   2   8 137.335 3.23535  -1
  16   2   3 137.335 3.23535   2
 -14   2   8 204.776 3.74704  -1
  14   2   3 204.776 3.74704   2
 -12   2   8 178.048 2.11559  -1
  12   2   4 178.048 2.11559   2
 -10   2   8 645.821 8.36174  -1
  10   2   5 645.821 8.36174   2
  -8   2   8 487.208 7.26223  -1
   8   2   5 487.208 7.26223   2
  -6   2   8 159.895 2.23373  -1
   6   2   6 159.895 2.23373   2
  -4   2   8 908.216 14.2185  -1
   4   2   7 908.216 14.2185   2
  -2   2   8 1020.66 15.5490  -1
   2   2   7 1020.66 15.5490   2
   0   2   8 0.53183 0.53292  -1
   0   2   8 0.53183 0.53292   2
   2   2   8 370.845 5.08367  -1
  -2   2   9 370.845 5.08367   2
   4   2   8 129.439 2.49057  -1
  -4   2   9 129.439 2.49057   2
   6   2   8 179.619 1.96680  -1
  -6   2  10 179.619 1.96680   2
   8   2   8 30.2893 1.44197  -1
  -8   2  11 30.2893 1.44197   2
  10   2   8 61.0447 2.03172  -1
 -10   2  11 61.0447 2.03172   2
  12   2   8 37.1970 1.20014  -1
 -12   2  12 37.1970 1.20014   2
  14   2   8 36.1004 2.11132  -1
 -14   2  13 36.1004 2.11132   2
  16   2   8 26.8021 2.44544  -1
 -16   2  13 26.8021 2.44544   2
  18   2   8 106.060 2.46294  -1
 -18   2  14 106.060 2.46294   2
  20   2   8 115.820 5.24645  -1
 -20   2  15 115.820 5.24645   2
  22   2   8 134.770 6.53533  -1
 -22   2  15 134.770 6.53533   2
  24   2   8 40.3269 3.39140  -1
 -24   2  16 40.3269 3.39140   2
  26   2   8 122.023 9.80266  -1
 -26   2  17 122.023 9.80266   2
  28   2   8 51.8574 8.84244  -1
 -28   2  17 51.8574 8.84244   2
  30   2   8 9.81938 5.71541  -1
 -30   2  18 9.81938 5.71541   2
 -33   3   8 -0.1641 5.58065  -1
 -33   3   3 -0.1641 5.58065   2
 -31   3   8 12.7650 9.05118  -1
 -31   3   2 12.7650 9.05118   2
 -29   3   8 34.8886 4.30039  -1
 -29   3   2 34.8886 4.30039   2
 -27   3   8 -0.5009 2.80930  -1
 -27   3   1 -0.5009 2.80930   2
 -25   3   8 51.6145 3.86266  -1
  25   3   0 51.6145 3.86266   2
 -23   3   8 81.2870 3.96681  -1
  23   3   0 81.2870 3.96681   2
 -21   3   8 10.8292 1.84229  -1
  21   3   1 10.8292 1.84229   2
 -19   3   8 27.3330 2.46183  -1
  19   3   2 27.3330 2.46183   2
 -17   3   8 60.8591 2.41091  -1
  17   3   2 60.8591 2.41091   2
 -15   3   8 95.9165 1.72016  -1
  15   3   3 95.9165 1.72016   2
 -13   3   8 138.110 2.51498  -1
  13   3   4 138.110 2.51498   2
 -11   3   8 33.6078 1.81278  -1
  11   3   4 33.6078 1.81278   2
  -9   3   8 351.240 3.31017  -1
   9   3   5 351.240 3.31017   2
  -7   3   8 783.365 11.7839  -1
   7   3   6 783.365 11.7839   2
  -5   3   8 281.735 5.78802  -1
   5   3   6 281.735 5.78802   2
  -3   3   8 265.104 3.14987  -1
   3   3   7 265.104 3.14987   2
   1   3   8 12.1237 1.36113  -1
  -1   3   8 12.1237 1.36113   2
   1   3   8 12.8972 0.86572   2
   3   3   8 212.129 2.25994  -1
  -3   3   9 212.129 2.25994   2
   5   3   8 102.956 1.97888  -1
  -5   3  10 102.956 1.97888   2
   7   3   8 254.255 3.43821  -1
  -7   3  10 254.255 3.43821   2
   9   3   8 254.301 3.11420  -1
  -9   3  11 254.301 3.11420   2
  11   3   8 242.011 3.69481  -1
 -11   3  12 242.011 3.69481   2
  13   3   8 86.6875 2.55480  -1
 -13   3  12 86.6875 2.55480   2
  15   3   8 150.252 2.40229  -1
 -15   3  13 150.252 2.40229   2
  17   3   8 5.16537 3.30743  -1
 -17   3  14 5.16537 3.30743   2
  19   3   8 -4.5217 4.34565  -1
 -19   3  14 -4.5217 4.34565   2
  21   3   8 75.1400 3.14057  -1
 -21   3  15 75.1400 3.14057   2
  23   3   8 85.8399 6.01481  -1
 -23   3  16 85.8399 6.01481   2
  25   3   8 41.5844 7.81537  -1
 -25   3  16 41.5844 7.81537   2
  27   3   8 64.6303 5.03247  -1
 -27   3  17 64.6303 5.03247   2
  29   3   8 23.1463 13.1940  -1
 -29   3  18 23.1463 13.1940   2
  31   3   8 -5.4883 13.5205  -1
 -31   3  18 -5.4883 13.5205   2
  33   3   8 27.7898 11.7399  -1
 -33   3  19 27.7898 11.7399   2
 -32   4   8 16.4098 12.6009  -1
 -32   4   3 16.4098 12.6009   2
 -30   4   8 -0.2285 4.43163  -1
 -30   4   2 -0.2285 4.43163   2
 -28   4   8 4.01649 4.23807  -1
 -28   4   1 4.01649 4.23807   2
 -26   4   8 0.63880 4.08196  -1
 -26   4   1 0.63880 4.08196   2
 -24   4   8 32.4833 2.63829  -1
  24   4   0 32.4833 2.63829   2
 -22   4   8 89.1981 3.67357  -1
  22   4   1 89.1981 3.67357   2
 -20   4   8 2.98535 2.58871  -1
  20   4   1 2.98535 2.58871   2
 -18   4   8 41.6840 1.75296  -1
  18   4   2 41.6840 1.75296   2
 -16   4   8 52.1261 2.37735  -1
  16   4   3 52.1261 2.37735   2
 -14   4   8 84.5898 2.53956  -1
  14   4   3 84.5898 2.53956   2
 -12   4   8 113.413 1.67540  -1
  12   4   4 113.413 1.67540   2
 -10   4   8 34.4489 2.03132  -1
  10   4   5 34.4489 2.03132   2
  -8   4   8 116.536 2.86225  -1
   8   4   5 116.536 2.86225   2
  -6   4   8 583.466 5.18872  -1
   6   4   6 583.466 5.18872   2
  -4   4   8 171.398 3.89317  -1
   4   4   7 171.398 3.89317   2
  -2   4   8 152.311 4.05656  -1
   2   4   7 152.311 4.05656   2
   0   4   8 138.584 1.67715  -1
   0   4   8 138.584 1.67715   2
   2   4   8 501.076 6.06438  -1
  -2   4   9 501.076 6.06438   2
   4   4   8 254.505 3.48054  -1
  -4   4   9 254.505 3.48054   2
   6   4   8 90.8470 1.43712  -1
  -6   4  10 90.8470 1.43712   2
   8   4   8 375.156 4.80449  -1
  -8   4  11 375.156 4.80449   2
  10   4   8 385.156 4.89656  -1
 -10   4  11 385.156 4.89656   2
  12   4   8 93.7137 1.99037  -1
 -12   4  12 93.7137 1.99037   2
  14   4   8 159.199 3.96887  -1
 -14   4  13 159.199 3.96887   2
  16   4   8 170.321 3.91825  -1
 -16   4  13 170.321 3.91825   2
  18   4   8 26.1040 1.93064  -1
 -18   4  14 26.1040 1.93064   2
  20   4   8 27.6290 4.36469  -1
 -20   4  15 27.6290 4.36469   2
  22   4   8 27.5614 4.58785  -1
 -22   4  15 27.5614 4.58785   2
  24   4   8 24.6035 3.06001  -1
 -24   4  16 24.6035 3.06001   2
  26   4   8 13.8524 10.7273  -1
 -26   4  17 13.8524 10.7273   2
  28   4   8 -14.367 12.2415  -1
 -28   4  17 -14.367 12.2415   2
  30   4   8 -1.6050 5.36483  -1
 -30   4  18 -1.6050 5.36483   2
  32   4   8 32.9220 14.1777  -1
 -32   4  19 32.9220 14.1777   2
 -33   5   8 11.1381 7.71532  -1
 -33   5   3 11.1381 7.71532   2
 -31   5   8 22.9674 16.4023  -1
 -31   5   2 22.9674 16.4023   2
 -29   5   8 0.89195 5.56396  -1
 -29   5   2 0.89195 5.56396   2
 -27   5   8 22.0550 3.34039  -1
 -27   5   1 22.0550 3.34039   2
 -25   5   8 8.60663 3.41096  -1
  25   5   0 8.60663 3.41096   2
 -23   5   8 1.18852 3.28699  -1
  23   5   0 1.18852 3.28699   2
 -21   5   8 15.3707 2.23213  -1
  21   5   1 15.3707 2.23213   2
 -19   5   8 3.69815 2.62584  -1
  19   5   2 3.69815 2.62584   2
 -17   5   8 43.5862 2.23686  -1
  17   5   2 43.5862 2.23686   2
 -15   5   8 317.292 3.88933  -1
  15   5   3 317.292 3.88933   2
 -13   5   8 56.0111 2.34767  -1
  13   5   4 56.0111 2.34767   2
 -11   5   8 90.3525 2.40365  -1
  11   5   4 90.3525 2.40365   2
  -9   5   8 389.834 3.99889  -1
   9   5   5 389.834 3.99889   2
  -7   5   8 132.327 2.70993  -1
   7   5   6 132.327 2.70993   2
  -5   5   8 48.7154 2.46046  -1
   5   5   6 48.7154 2.46046   2
  -3   5   8 207.645 2.22246  -1
   3   5   7 207.645 2.22246   2
  -1   5   8 99.1278 2.60867  -1
   1   5   8 99.1278 2.60867   2
   1   5   8 100.589 2.40138  -1
  -1   5   8 100.589 2.40138   2
   3   5   8 157.483 1.72420  -1
  -3   5   9 157.483 1.72420   2
   5   5   8 229.025 3.50524  -1
  -5   5  10 229.025 3.50524   2
   7   5   8 123.769 2.39478  -1
  -7   5  10 123.769 2.39478   2
   9   5   8 444.217 4.44470  -1
  -9   5  11 444.217 4.44470   2
  11   5   8 133.398 2.94599  -1
 -11   5  12 133.398 2.94599   2
  13   5   8 73.0030 2.57417  -1
 -13   5  12 73.0030 2.57417   2
  15   5   8 142.329 2.99883  -1
 -15   5  13 142.329 2.99883   2
  17   5   8 66.9499 3.57744  -1
 -17   5  14 66.9499 3.57744   2
  19   5   8 50.5139 3.91007  -1
 -19   5  14 50.5139 3.91007   2
  21   5   8 3.09874 2.22223  -1
 -21   5  15 3.09874 2.22223   2
  23   5   8 35.6597 5.09107  -1
 -23   5  16 35.6597 5.09107   2
  25   5   8 7.15182 6.19546  -1
 -25   5  16 7.15182 6.19546   2
  27   5   8 -0.9902 4.69645  -1
 -27   5  17 -0.9902 4.69645   2
  29   5   8 11.2667 13.3443  -1
 -29   5  18 11.2667 13.3443   2
  31   5   8 11.4507 14.9928  -1
 -31   5  18 11.4507 14.9928   2
 -30   6   8 5.89657 5.86874  -1
 -30   6   2 5.89657 5.86874   2
 -28   6   8 42.1164 9.62144  -1
 -28   6   1 42.1164 9.62144   2
 -26   6   8 43.0854 5.97561  -1
 -26   6   1 43.0854 5.97561   2
 -24   6   8 28.4604 3.69726  -1
  24   6   0 28.4604 3.69726   2
 -22   6   8 90.5261 4.19617  -1
  22   6   1 90.5261 4.19617   2
 -20   6   8 37.3874 3.05082  -1
  20   6   1 37.3874 3.05082   2
 -18   6   8 1.56413 1.57352  -1
  18   6   2 1.56413 1.57352   2
 -16   6   8 22.1021 2.39049  -1
  16   6   3 22.1021 2.39049   2
 -14   6   8 27.1175 2.30266  -1
  14   6   3 27.1175 2.30266   2
 -12   6   8 112.456 1.98546  -1
  12   6   4 112.456 1.98546   2
 -10   6   8 93.1667 2.30358  -1
  10   6   5 93.1667 2.30358   2
  -8   6   8 214.723 3.20526  -1
   8   6   5 214.723 3.20526   2
  -6   6   8 487.701 4.59847  -1
   6   6   6 487.701 4.59847   2
  -4   6   8 8.45333 2.10849  -1
   4   6   7 8.45333 2.10849   2
  -2   6   8 244.948 4.65374  -1
   2   6   7 244.948 4.65374   2
   0   6   8 85.5951 1.40488  -1
   0   6   8 85.5951 1.40488   2
   2   6   8 496.360 6.50034  -1
  -2   6   9 496.360 6.50034   2
   4   6   8 257.238 4.25930  -1
  -4   6   9 257.238 4.25930   2
   6   6   8 265.227 2.95705  -1
  -6   6  10 265.227 2.95705   2
   8   6   8 395.102 5.72148  -1
  -8   6  11 395.102 5.72148   2
  10   6   8 349.982 5.17807  -1
 -10   6  11 349.982 5.17807   2
  12   6   8 163.384 2.66070  -1
 -12   6  12 163.384 2.66070   2
  14   6   8 42.5210 3.10620  -1
 -14   6  13 42.5210 3.10620   2
  16   6   8 35.3176 3.10462  -1
 -16   6  13 35.3176 3.10462   2
  18   6   8 116.276 3.21864  -1
 -18   6  14 116.276 3.21864   2
  20   6   8 19.7398 4.00328  -1
 -20   6  15 19.7398 4.00328   2
  22   6   8 24.4255 5.14413  -1
 -22   6  15 24.4255 5.14413   2
  24   6   8 90.4980 4.80406  -1
 -24   6  16 90.4980 4.80406   2
  26   6   8 6.88050 12.7444  -1
 -26   6  17 6.88050 12.7444   2
  28   6   8 6.62639 13.9286  -1
 -28   6  17 6.62639 13.9286   2
  30   6   8 22.3923 11.9271  -1
 -30   6  18 22.3923 11.9271   2
 -33   7   8 5.34451 12.7538  -1
 -33   7   3 5.34451 12.7538   2
 -29   7   8 44.1509 10.0775  -1
 -29   7   2 44.1509 10.0775   2
 -27   7   8 65.1225 5.77721  -1
 -27   7   1 65.1225 5.77721   2
 -25   7   8 33.7616 5.52004  -1
  25   7   0 33.7616 5.52004   2
 -23   7   8 98.4316 6.41190  -1
  23   7   0 98.4316 6.41190   2
 -21   7   8 37.9186 3.60311  -1
  21   7   1 37.9186 3.60311   2
 -19   7   8 14.5885 2.74540  -1
  19   7   2 14.5885 2.74540   2
 -17   7   8 12.6325 2.55832  -1
  17   7   2 12.6325 2.55832   2
 -15   7   8 71.0360 2.20237  -1
  15   7   3 71.0360 2.20237   2
 -13   7   8 189.200 3.43233  -1
  13   7   4 189.200 3.43233   2
 -11   7   8 438.228 5.45824  -1
  11   7   4 438.228 5.45824   2
  -9   7   8 84.3629 1.77863  -1
   9   7   5 84.3629 1.77863   2
  -7   7   8 713.874 8.31948  -1
   7   7   6 713.874 8.31948   2
  -5   7   8 406.545 5.19419  -1
   5   7   6 406.545 5.19419   2
  -3   7   8 76.0181 1.53525  -1
   3   7   7 76.0181 1.53525   2
  -1   7   8 165.366 3.35366  -1
   1   7   8 165.366 3.35366   2
   1   7   8 164.117 3.07884  -1
  -1   7   8 164.117 3.07884   2
   3   7   8 290.591 3.03250  -1
  -3   7   9 290.591 3.03250   2
   5   7   8 319.247 4.80634  -1
  -5   7  10 319.247 4.80634   2
   7   7   8 243.890 4.21529  -1
  -7   7  10 243.890 4.21529   2
   9   7   8 25.3166 1.74315  -1
  -9   7  11 25.3166 1.74315   2
  11   7   8 58.8195 3.06978  -1
 -11   7  12 58.8195 3.06978   2
  13   7   8 1.55342 2.80701  -1
 -13   7  12 1.55342 2.80701   2
  15   7   8 8.51566 1.82339  -1
 -15   7  13 8.51566 1.82339   2
  17   7   8 90.1216 4.87664  -1
 -17   7  14 90.1216 4.87664   2
  19   7   8 102.710 5.26521  -1
 -19   7  14 102.710 5.26521   2
  21   7   8 47.9262 3.33977  -1
 -21   7  15 47.9262 3.33977   2
  23   7   8 161.715 7.34395  -1
 -23   7  16 161.715 7.34395   2
  25   7   8 73.2312 10.4353  -1
 -25   7  16 73.2312 10.4353   2
  27   7   8 12.1597 6.10733  -1
 -27   7  17 12.1597 6.10733   2
  29   7   8 58.8973 15.9589  -1
 -29   7  18 58.8973 15.9589   2
 -30   8   8 10.5209 8.55324  -1
 -30   8   2 10.5209 8.55324   2
 -28   8   8 22.1962 15.9874  -1
 -28   8   1 22.1962 15.9874   2
 -26   8   8 19.3354 9.09400  -1
 -26   8   1 19.3354 9.09400   2
 -24   8   8 35.2410 4.44534  -1
  24   8   0 35.2410 4.44534   2
 -22   8   8 35.4150 4.92330  -1
  22   8   1 35.4150 4.92330   2
 -20   8   8 24.6834 4.81888  -1
  20   8   1 24.6834 4.81888   2
 -18   8   8 5.70720 2.02660  -1
  18   8   2 5.70720 2.02660   2
 -16   8   8 15.6279 2.76194  -1
  16   8   3 15.6279 2.76194   2
 -14   8   8 86.9139 3.09553  -1
  14   8   3 86.9139 3.09553   2
 -12   8   8 70.6191 2.28401  -1
  12   8   4 70.6191 2.28401   2
 -10   8   8 121.686 3.32639  -1
  10   8   5 121.686 3.32639   2
  -8   8   8 324.485 4.88733  -1
   8   8   5 324.485 4.88733   2
  -6   8   8 148.854 2.33935  -1
   6   8   6 148.854 2.33935   2
  -4   8   8 45.7366 2.11311  -1
   4   8   7 45.7366 2.11311   2
  -2   8   8 32.4142 2.22423  -1
   2   8   7 32.4142 2.22423   2
   0   8   8 40.1672 1.38573  -1
   0   8   8 40.1672 1.38573   2
   2   8   8 218.286 4.22152  -1
  -2   8   9 218.286 4.22152   2
   4   8   8 140.229 2.86790  -1
  -4   8   9 140.229 2.86790   2
   6   8   8 126.862 2.39392  -1
  -6   8  10 126.862 2.39392   2
   8   8   8 302.625 5.42040  -1
  -8   8  11 302.625 5.42040   2
  10   8   8 105.385 3.48077  -1
 -10   8  11 105.385 3.48077   2
  12   8   8 16.9206 2.12369  -1
 -12   8  12 16.9206 2.12369   2
  14   8   8 36.3825 4.36051  -1
 -14   8  13 36.3825 4.36051   2
  16   8   8 52.4510 4.66679  -1
 -16   8  13 52.4510 4.66679   2
  18   8   8 53.7107 2.68123  -1
 -18   8  14 53.7107 2.68123   2
  20   8   8 52.7280 5.62945  -1
 -20   8  15 52.7280 5.62945   2
  22   8   8 70.8064 6.65015  -1
 -22   8  15 70.8064 6.65015   2
  24   8   8 74.3858 6.11168  -1
 -24   8  16 74.3858 6.11168   2
  26   8   8 35.1687 10.1146  -1
 -26   8  17 35.1687 10.1146   2
  28   8   8 17.1488 14.1537  -1
 -28   8  17 17.1488 14.1537   2
 -27   9   8 19.6107 5.83166  -1
 -27   9   1 19.6107 5.83166   2
 -25   9   8 14.0880 15.2120  -1
  25   9   0 14.0880 15.2120   2
 -23   9   8 7.04350 6.53524  -1
  23   9   0 7.04350 6.53524   2
 -21   9   8 48.4447 4.27182  -1
  21   9   1 48.4447 4.27182   2
 -19   9   8 7.82871 4.28951  -1
  19   9   2 7.82871 4.28951   2
 -17   9   8 -1.0458 3.52907  -1
  17   9   2 -1.0458 3.52907   2
 -15   9   8 19.5944 2.14651  -1
  15   9   3 19.5944 2.14651   2
 -13   9   8 46.6383 3.36285  -1
  13   9   4 46.6383 3.36285   2
 -11   9   8 69.6474 3.21366  -1
  11   9   4 69.6474 3.21366   2
  -9   9   8 40.9407 1.98611  -1
   9   9   5 40.9407 1.98611   2
  -7   9   8 48.8475 2.63593  -1
   7   9   6 48.8475 2.63593   2
  -5   9   8 41.8993 2.68393  -1
   5   9   6 41.8993 2.68393   2
  -3   9   8 5.71653 1.24546  -1
   3   9   7 5.71653 1.24546   2
  -1   9   8 101.174 2.82809  -1
   1   9   8 101.174 2.82809   2
   1   9   8 96.7448 2.98666  -1
  -1   9   8 96.7448 2.98666   2
   3   9   8 244.810 3.56710  -1
  -3   9   9 244.810 3.56710   2
   5   9   8 87.2522 3.21377  -1
  -5   9  10 87.2522 3.21377   2
   7   9   8 132.037 3.26389  -1
  -7   9  10 132.037 3.26389   2
   9   9   8 323.734 4.99872  -1
  -9   9  11 323.734 4.99872   2
  11   9   8 35.2007 3.76213  -1
 -11   9  12 35.2007 3.76213   2
  13   9   8 4.45051 4.15047  -1
 -13   9  12 4.45051 4.15047   2
  15   9   8 133.306 3.81964  -1
 -15   9  13 133.306 3.81964   2
  17   9   8 27.2307 4.87655  -1
 -17   9  14 27.2307 4.87655   2
  19   9   8 35.5578 5.57164  -1
 -19   9  14 35.5578 5.57164   2
  21   9   8 27.1985 4.38623  -1
 -21   9  15 27.1985 4.38623   2
  23   9   8 -3.6507 8.74588  -1
 -23   9  16 -3.6507 8.74588   2
  25   9   8 18.3663 9.98299  -1
 -25   9  16 18.3663 9.98299   2
  27   9   8 -6.7752 10.5761  -1
 -27   9  17 -6.7752 10.5761   2
 -26  10   8 8.51748 14.3657  -1
 -26  10   1 8.51748 14.3657   2
 -24  10   8 20.3095 5.69585  -1
  24  10   0 20.3095 5.69585   2
 -22  10   8 16.2699 9.78630  -1
  22  10   1 16.2699 9.78630   2
 -20  10   8 24.8616 6.31071  -1
  20  10   1 24.8616 6.31071   2
 -18  10   8 5.38626 3.00476  -1
  18  10   2 5.38626 3.00476   2
 -16  10   8 0.26620 4.11097  -1
  16  10   3 0.26620 4.11097   2
 -14  10   8 1.16722 4.27092  -1
  14  10   3 1.16722 4.27092   2
 -12  10   8 13.4365 2.20633  -1
  12  10   4 13.4365 2.20633   2
 -10  10   8 7.27536 3.09750  -1
  10  10   5 7.27536 3.09750   2
  -8  10   8 10.7429 2.85637  -1
   8  10   5 10.7429 2.85637   2
  -6  10   8 15.8349 1.70219  -1
   6  10   6 15.8349 1.70219   2
  -4  10   8 24.6613 3.11145  -1
   4  10   7 24.6613 3.11145   2
  -2  10   8 6.31385 2.71550  -1
   2  10   7 6.31385 2.71550   2
   0  10   8 32.6905 1.74116  -1
   0  10   8 32.6905 1.74116   2
   2  10   8 177.807 4.35374  -1
  -2  10   9 177.807 4.35374   2
   4  10   8 62.3056 3.07919  -1
  -4  10   9 62.3056 3.07919   2
   6  10   8 90.4884 2.67985  -1
  -6  10  10 90.4884 2.67985   2
   8  10   8 186.247 5.39718  -1
  -8  10  11 186.247 5.39718   2
  10  10   8 114.891 4.92832  -1
 -10  10  11 114.891 4.92832   2
  12  10   8 91.7760 3.53656  -1
 -12  10  12 91.7760 3.53656   2
  14  10   8 101.052 6.24659  -1
 -14  10  13 101.052 6.24659   2
  16  10   8 54.8816 5.71360  -1
 -16  10  13 54.8816 5.71360   2
  18  10   8 1.24935 3.35570  -1
 -18  10  14 1.24935 3.35570   2
  20  10   8 29.5025 7.44466  -1
 -20  10  15 29.5025 7.44466   2
  22  10   8 4.15643 7.92021  -1
 -22  10  15 4.15643 7.92021   2
  24  10   8 6.07322 7.58339  -1
 -24  10  16 6.07322 7.58339   2
  26  10   8 3.55182 13.8291  -1
 -26  10  17 3.55182 13.8291   2
 -27  11   8 -5.8459 10.8327  -1
 -27  11   1 -5.8459 10.8327   2
 -23  11   8 26.8444 13.8973  -1
  23  11   0 26.8444 13.8973   2
 -21  11   8 6.50121 6.10328  -1
  21  11   1 6.50121 6.10328   2
 -19  11   8 33.9130 6.45236  -1
  19  11   2 33.9130 6.45236   2
 -17  11   8 7.71202 5.74454  -1
  17  11   2 7.71202 5.74454   2
 -15  11   8 -0.2110 2.56533  -1
  15  11   3 -0.2110 2.56533   2
 -13  11   8 32.8560 4.24514  -1
  13  11   4 32.8560 4.24514   2
 -11  11   8 16.1515 4.40530  -1
  11  11   4 16.1515 4.40530   2
  -9  11   8 5.54915 2.28132  -1
   9  11   5 5.54915 2.28132   2
  -7  11   8 67.3883 4.11844  -1
   7  11   6 67.3883 4.11844   2
  -5  11   8 83.4592 4.05631  -1
   5  11   6 83.4592 4.05631   2
  -3  11   8 18.6761 1.82535  -1
   3  11   7 18.6761 1.82535   2
  -1  11   8 1.46296 3.12280  -1
   1  11   8 1.46296 3.12280   2
   1  11   8 0.54214 3.57225  -1
  -1  11   8 0.54214 3.57225   2
   3  11   8 11.8943 1.94411  -1
  -3  11   9 11.8943 1.94411   2
   5  11   8 33.2285 3.57772  -1
  -5  11  10 33.2285 3.57772   2
   7  11   8 51.7373 3.81987  -1
  -7  11  10 51.7373 3.81987   2
   9  11   8 23.0154 2.37670  -1
  -9  11  11 23.0154 2.37670   2
  11  11   8 17.2593 4.22668  -1
 -11  11  12 17.2593 4.22668   2
  13  11   8 47.9871 5.26122  -1
 -13  11  12 47.9871 5.26122   2
  15  11   8 12.3070 2.92574  -1
 -15  11  13 12.3070 2.92574   2
  17  11   8 0.61146 6.75447  -1
 -17  11  14 0.61146 6.75447   2
  19  11   8 2.50472 8.63140  -1
 -19  11  14 2.50472 8.63140   2
  21  11   8 11.9804 4.54170  -1
 -21  11  15 11.9804 4.54170   2
  23  11   8 16.4825 14.0995  -1
 -23  11  16 16.4825 14.0995   2
 -20  12   8 41.3943 10.6666  -1
  20  12   1 41.3943 10.6666   2
 -18  12   8 13.6343 4.45357  -1
  18  12   2 13.6343 4.45357   2
 -16  12   8 24.0721 8.33290  -1
  16  12   3 24.0721 8.33290   2
 -14  12   8 14.5384 4.98511  -1
  14  12   3 14.5384 4.98511   2
 -12  12   8 22.5805 3.08033  -1
  12  12   4 22.5805 3.08033   2
 -10  12   8 65.2626 5.54192  -1
  10  12   5 65.2626 5.54192   2
  -8  12   8 42.3591 5.06496  -1
   8  12   5 42.3591 5.06496   2
  -6  12   8 57.6174 2.63625  -1
   6  12   6 57.6174 2.63625   2
  -4  12   8 70.6952 4.19914  -1
   4  12   7 70.6952 4.19914   2
  -2  12   8 82.2706 4.51041  -1
   2  12   7 82.2706 4.51041   2
   0  12   8 69.5640 2.67040  -1
   0  12   8 69.5640 2.67040   2
   2  12   8 31.5776 3.83274  -1
  -2  12   9 31.5776 3.83274   2
   4  12   8 28.1953 3.63572  -1
  -4  12   9 28.1953 3.63572   2
   6  12   8 36.7218 2.77288  -1
  -6  12  10 36.7218 2.77288   2
   8  12   8 6.98631 4.99349  -1
  -8  12  11 6.98631 4.99349   2
  10  12   8 32.3923 5.24694  -1
 -10  12  11 32.3923 5.24694   2
  12  12   8 4.51960 2.84211  -1
 -12  12  12 4.51960 2.84211   2
  14  12   8 4.19991 7.21715  -1
 -14  12  13 4.19991 7.21715   2
  16  12   8 8.64055 7.51801  -1
 -16  12  13 8.64055 7.51801   2
  18  12   8 6.78500 5.23559  -1
 -18  12  14 6.78500 5.23559   2
  20  12   8 26.8040 14.1672  -1
 -20  12  15 26.8040 14.1672   2
 -17  13   8 28.4046 15.0831  -1
  17  13   2 28.4046 15.0831   2
 -15  13   8 31.2508 5.03470  -1
  15  13   3 31.2508 5.03470   2
 -13  13   8 15.1250 8.23769  -1
  13  13   4 15.1250 8.23769   2
 -11  13   8 17.7108 7.60452  -1
  11  13   4 17.7108 7.60452   2
  -9  13   8 141.757 4.78238  -1
   9  13   5 141.757 4.78238   2
  -7  13   8 11.2726 5.22555  -1
   7  13   6 11.2726 5.22555   2
  -5  13   8 10.7478 4.75957  -1
   5  13   6 10.7478 4.75957   2
  -3  13   8 79.1092 3.33768  -1
   3  13   7 79.1092 3.33768   2
  -1  13   8 35.8476 4.02057  -1
   1  13   8 35.8476 4.02057   2
   1  13   8 33.4497 4.10785  -1
  -1  13   8 33.4497 4.10785   2
   3  13   8 30.0650 2.58039  -1
  -3  13   9 30.0650 2.58039   2
   5  13   8 69.7307 4.84155  -1
  -5  13  10 69.7307 4.84155   2
   7  13   8 40.5179 5.36258  -1
  -7  13  10 40.5179 5.36258   2
   9  13   8 10.7081 3.38667  -1
  -9  13  11 10.7081 3.38667   2
  11  13   8 28.0018 6.66940  -1
 -11  13  12 28.0018 6.66940   2
  13  13   8 24.0819 8.07947  -1
 -13  13  12 24.0819 8.07947   2
  15  13   8 -6.4624 4.88488  -1
 -15  13  13 -6.4624 4.88488   2
  17  13   8 3.32520 14.8190  -1
 -17  13  14 3.32520 14.8190   2
 -14  14   8 40.2693 8.78186  -1
  14  14   3 40.2693 8.78186   2
 -12  14   8 35.6875 5.59627  -1
  12  14   4 35.6875 5.59627   2
 -10  14   8 47.9486 8.08556  -1
  10  14   5 47.9486 8.08556   2
  -8  14   8 70.4953 6.56773  -1
   8  14   5 70.4953 6.56773   2
  -6  14   8 62.8493 3.68724  -1
   6  14   6 62.8493 3.68724   2
  -4  14   8 28.1069 6.01795  -1
   4  14   7 28.1069 6.01795   2
  -2  14   8 1.03518 6.09845  -1
   2  14   7 1.03518 6.09845   2
   0  14   8 10.1122 2.75692  -1
   0  14   8 10.1122 2.75692   2
   2  14   8 12.4851 5.06799  -1
  -2  14   9 12.4851 5.06799   2
   4  14   8 18.1264 5.60145  -1
  -4  14   9 18.1264 5.60145   2
   6  14   8 69.1488 4.22947  -1
  -6  14  10 69.1488 4.22947   2
   8  14   8 34.5660 7.28852  -1
  -8  14  11 34.5660 7.28852   2
  10  14   8 8.07390 12.5985  -1
 -10  14  11 8.07390 12.5985   2
  12  14   8 30.4127 6.36065  -1
 -12  14  12 30.4127 6.36065   2
  14  14   8 21.3440 13.8216  -1
 -14  14  13 21.3440 13.8216   2
 -15  15   8 24.5381 10.5197  -1
  15  15   3 24.5381 10.5197   2
 -13  15   8 32.6780 16.0829  -1
  13  15   4 32.6780 16.0829   2
 -11  15   8 48.0105 16.0039  -1
  11  15   4 48.0105 16.0039   2
  -9  15   8 43.8366 7.87312  -1
   9  15   5 43.8366 7.87312   2
  -7  15   8 34.1485 8.33037  -1
   7  15   6 34.1485 8.33037   2
  -5  15   8 40.2516 8.40387  -1
   5  15   6 40.2516 8.40387   2
  -3  15   8 18.3605 4.87208  -1
   3  15   7 18.3605 4.87208   2
  -1  15   8 19.2716 7.08148  -1
   1  15   8 19.2716 7.08148   2
   1  15   8 12.2541 6.76618  -1
  -1  15   8 12.2541 6.76618   2
   3  15   8 26.2826 4.88440  -1
  -3  15   9 26.2826 4.88440   2
   5  15   8 72.1794 8.29914  -1
  -5  15  10 72.1794 8.29914   2
   7  15   8 42.3973 10.7136  -1
  -7  15  10 42.3973 10.7136   2
   9  15   8 4.09073 6.61275  -1
  -9  15  11 4.09073 6.61275   2
  -6  16   8 5.70936 9.40790  -1
   6  16   6 5.70936 9.40790   2
  -4  16   8 39.8750 14.9367  -1
   4  16   7 39.8750 14.9367   2
  -2  16   8 35.8803 15.0283  -1
   2  16   7 35.8803 15.0283   2
   0  16   8 23.8836 10.0487  -1
   0  16   8 23.8836 10.0487   2
 -32   0   9 33.4934 13.6574  -1
 -32   0   2 33.4934 13.6574   2
 -30   0   9 5.07869 8.53501  -1
 -30   0   1 5.07869 8.53501   2
 -28   0   9 62.2507 11.9118  -1
  28   0   0 62.2507 11.9118   2
 -26   0   9 165.830 8.00529  -1
  26   0   0 165.830 8.00529   2
 -24   0   9 1.41286 2.69801  -1
  24   0   1 1.41286 2.69801   2
 -22   0   9 74.9976 4.54274  -1
  22   0   2 74.9976 4.54274   2
 -20   0   9 187.848 5.17352  -1
  20   0   2 187.848 5.17352   2
 -18   0   9 1.22149 1.49098  -1
  18   0   3 1.22149 1.49098   2
 -16   0   9 13.6464 3.17661  -1
  16   0   4 13.6464 3.17661   2
 -14   0   9 4.21946 2.40510  -1
  14   0   4 4.21946 2.40510   2
 -12   0   9 0.21166 1.07105  -1
  12   0   5 0.21166 1.07105   2
 -10   0   9 -0.3453 3.79335  -1
  10   0   6 -0.3453 3.79335   2
  -8   0   9 283.591 7.53732  -1
   8   0   6 283.591 7.53732   2
  -6   0   9 -1.0939 1.06831  -1
   6   0   7 -1.0939 1.06831   2
  -4   0   9 127.288 3.63258  -1
   4   0   8 127.288 3.63258   2
  -2   0   9 7.87671 1.86214  -1
   2   0   8 7.87671 1.86214   2
   0   0   9 -0.5616 0.92324  -1
   0   0   9 -0.5616 0.92324   2
   2   0   9 3290.06 59.1056  -1
  -2   0  10 3290.06 59.1056   2
   4   0   9 918.685 17.3857  -1
  -4   0  10 918.685 17.3857   2
   6   0   9 -1.5616 0.94606  -1
  -6   0  11 -1.5616 0.94606   2
   8   0   9 1844.52 31.6550  -1
  -8   0  12 1844.52 31.6550   2
  10   0   9 828.346 16.6047  -1
 -10   0  12 828.346 16.6047   2
  12   0   9 -1.5718 1.30067  -1
 -12   0  13 -1.5718 1.30067   2
  14   0   9 212.152 6.18954  -1
 -14   0  14 212.152 6.18954   2
  16   0   9 171.144 6.75172  -1
 -16   0  14 171.144 6.75172   2
  18   0   9 -0.9024 2.10192  -1
 -18   0  15 -0.9024 2.10192   2
  20   0   9 8.47614 4.12992  -1
 -20   0  16 8.47614 4.12992   2
  22   0   9 30.6022 5.27967  -1
 -22   0  16 30.6022 5.27967   2
  24   0   9 -1.6424 3.80395  -1
 -24   0  17 -1.6424 3.80395   2
 -35   1   9 4.46360 14.6491  -1
 -35   1   3 4.46360 14.6491   2
 -33   1   9 1.66700 10.2975  -1
 -33   1   2 1.66700 10.2975   2
 -31   1   9 10.0238 12.2865  -1
 -31   1   1 10.0238 12.2865   2
 -29   1   9 13.8594 4.65607  -1
 -29   1   1 13.8594 4.65607   2
 -27   1   9 45.3465 2.99150  -1
  27   1   0 45.3465 2.99150   2
 -25   1   9 5.93523 3.80994  -1
  25   1   1 5.93523 3.80994   2
 -23   1   9 38.7771 2.69584  -1
  23   1   1 38.7771 2.69584   2
 -21   1   9 145.337 2.83065  -1
  21   1   2 145.337 2.83065   2
 -19   1   9 148.746 4.06447  -1
  19   1   3 148.746 4.06447   2
 -17   1   9 108.730 2.50120  -1
  17   1   3 108.730 2.50120   2
 -15   1   9 280.950 2.93456  -1
  15   1   4 280.950 2.93456   2
 -13   1   9 309.529 4.18786  -1
  13   1   5 309.529 4.18786   2
 -11   1   9 535.759 7.20814  -1
  11   1   5 535.759 7.20814   2
  -9   1   9 266.736 2.87313  -1
   9   1   6 266.736 2.87313   2
  -7   1   9 439.796 6.59424  -1
   7   1   7 439.796 6.59424   2
  -5   1   9 266.063 4.11081  -1
   5   1   7 266.063 4.11081   2
  -3   1   9 1218.62 12.8983  -1
   3   1   8 1218.62 12.8983   2
  -1   1   9 305.950 4.65380  -1
   1   1   9 305.950 4.65380   2
   1   1   9 312.049 4.69617  -1
  -1   1   9 312.049 4.69617   2
   3   1   9 384.746 4.14047  -1
  -3   1  10 384.746 4.14047   2
   5   1   9 35.2147 1.51338  -1
  -5   1  11 35.2147 1.51338   2
   7   1   9 269.583 3.61492  -1
  -7   1  11 269.583 3.61492   2
   9   1   9 616.104 6.07751  -1
  -9   1  12 616.104 6.07751   2
  11   1   9 88.5945 2.29067  -1
 -11   1  13 88.5945 2.29067   2
  13   1   9 69.8883 2.36294  -1
 -13   1  13 69.8883 2.36294   2
  15   1   9 373.566 4.20007  -1
 -15   1  14 373.566 4.20007   2
  17   1   9 321.273 5.59066  -1
 -17   1  15 321.273 5.59066   2
  19   1   9 149.582 5.09642  -1
 -19   1  15 149.582 5.09642   2
  21   1   9 39.7243 2.48177  -1
 -21   1  16 39.7243 2.48177   2
  23   1   9 102.238 5.38003  -1
 -23   1  17 102.238 5.38003   2
  25   1   9 81.2056 12.3863  -1
 -25   1  17 81.2056 12.3863   2
  27   1   9 15.0935 4.02277  -1
 -27   1  18 15.0935 4.02277   2
 -36   2   9 0.96084 11.5178  -1
 -36   2   3 0.96084 11.5178   2
 -32   2   9 17.2392 8.72687  -1
 -32   2   2 17.2392 8.72687   2
 -30   2   9 17.8904 3.91290  -1
 -30   2   1 17.8904 3.91290   2
 -28   2   9 15.4517 5.39789  -1
  28   2   0 15.4517 5.39789   2
 -26   2   9 14.0273 3.89244  -1
  26   2   0 14.0273 3.89244   2
 -24   2   9 0.59621 2.22258  -1
  24   2   1 0.59621 2.22258   2
 -22   2   9 47.4023 3.31245  -1
  22   2   2 47.4023 3.31245   2
 -20   2   9 61.6903 2.80582  -1
  20   2   2 61.6903 2.80582   2
 -18   2   9 414.068 4.50351  -1
  18   2   3 414.068 4.50351   2
 -16   2   9 291.642 4.76178  -1
  16   2   4 291.642 4.76178   2
 -14   2   9 249.426 3.99700  -1
  14   2   4 249.426 3.99700   2
 -12   2   9 1166.75 10.0958  -1
  12   2   5 1166.75 10.0958   2
 -10   2   9 637.477 8.16827  -1
  10   2   6 637.477 8.16827   2
  -8   2   9 601.896 7.65450  -1
   8   2   6 601.896 7.65450   2
  -6   2   9 662.159 6.44831  -1
   6   2   7 662.159 6.44831   2
  -4   2   9 132.140 2.59384  -1
   4   2   8 132.140 2.59384   2
  -2   2   9 381.718 5.56232  -1
   2   2   8 381.718 5.56232   2
   0   2   9 77.9931 1.30478  -1
   0   2   9 77.9931 1.30478   2
   2   2   9 171.409 2.97084  -1
  -2   2  10 171.409 2.97084   2
   4   2   9 20.9455 1.53569  -1
  -4   2  10 20.9455 1.53569   2
   6   2   9 57.4069 1.07365  -1
  -6   2  11 57.4069 1.07365   2
   8   2   9 238.147 3.59556  -1
  -8   2  12 238.147 3.59556   2
  10   2   9 192.851 3.35841  -1
 -10   2  12 192.851 3.35841   2
  10   2   9 308.499 18.0816  -1
 -10   2  13 308.499 18.0816   2
 -10   2  12 308.499 18.0816   2
  12   2   9 140.641 2.21873  -1
 -12   2  13 140.641 2.21873   2
  14   2   9 355.598 6.22469  -1
 -14   2  14 355.598 6.22469   2
  16   2   9 365.789 5.93983  -1
 -16   2  14 365.789 5.93983   2
  18   2   9 276.334 4.34927  -1
 -18   2  15 276.334 4.34927   2
  20   2   9 165.226 4.41949  -1
 -20   2  16 165.226 4.41949   2
  22   2   9 146.157 6.88610  -1
 -22   2  16 146.157 6.88610   2
  24   2   9 150.900 4.95005  -1
 -24   2  17 150.900 4.95005   2
  26   2   9 22.0984 12.0438  -1
 -26   2  18 22.0984 12.0438   2
  28   2   9 17.5485 12.3697  -1
 -28   2  18 17.5485 12.3697   2
  30   2   9 16.9515 5.77225  -1
 -30   2  19 16.9515 5.77225   2
 -33   3   9 10.3656 7.33332  -1
 -33   3   2 10.3656 7.33332   2
 -31   3   9 47.8163 9.41663  -1
 -31   3   1 47.8163 9.41663   2
 -29   3   9 26.1660 5.25698  -1
 -29   3   1 26.1660 5.25698   2
 -27   3   9 46.8092 3.16040  -1
  27   3   0 46.8092 3.16040   2
 -25   3   9 98.3695 4.71352  -1
  25   3   1 98.3695 4.71352   2
 -23   3   9 6.30487 3.16020  -1
  23   3   1 6.30487 3.16020   2
 -21   3   9 8.48074 1.97988  -1
  21   3   2 8.48074 1.97988   2
 -19   3   9 144.714 3.56003  -1
  19   3   3 144.714 3.56003   2
 -17   3   9 215.459 3.94711  -1
  17   3   3 215.459 3.94711   2
 -15   3   9 440.994 4.54680  -1
  15   3   4 440.994 4.54680   2
 -13   3   9 495.755 6.27664  -1
  13   3   5 495.755 6.27664   2
 -11   3   9 688.777 10.4175  -1
  11   3   5 688.777 10.4175   2
  -9   3   9 491.695 4.72058  -1
   9   3   6 491.695 4.72058   2
  -7   3   9 394.106 5.40059  -1
   7   3   7 394.106 5.40059   2
  -5   3   9 378.764 6.59827  -1
   5   3   7 378.764 6.59827   2
  -3   3   9 203.964 2.35340  -1
   3   3   8 203.964 2.35340   2
  -1   3   9 316.102 4.47557  -1
   1   3   9 316.102 4.47557   2
   1   3   9 322.376 4.09831  -1
  -1   3   9 322.376 4.09831   2
   3   3   9 362.484 3.36668  -1
  -3   3  10 362.484 3.36668   2
   5   3   9 355.614 4.14495  -1
  -5   3  11 355.614 4.14495   2
   7   3   9 282.566 3.92928  -1
  -7   3  11 282.566 3.92928   2
   9   3   9 27.7491 1.00742  -1
  -9   3  12 27.7491 1.00742   2
  11   3   9 109.520 2.96319  -1
 -11   3  13 109.520 2.96319   2
  13   3   9 88.3273 2.81252  -1
 -13   3  13 88.3273 2.81252   2
  15   3   9 197.828 3.13154  -1
 -15   3  14 197.828 3.13154   2
  17   3   9 331.357 7.66715  -1
 -17   3  15 331.357 7.66715   2
  19   3   9 248.189 7.46460  -1
 -19   3  15 248.189 7.46460   2
  21   3   9 145.653 4.22601  -1
 -21   3  16 145.653 4.22601   2
  23   3   9 89.8230 7.49265  -1
 -23   3  17 89.8230 7.49265   2
  25   3   9 90.5656 12.6432  -1
 -25   3  17 90.5656 12.6432   2
  27   3   9 19.7035 4.49434  -1
 -27   3  18 19.7035 4.49434   2
  29   3   9 11.8803 13.0566  -1
 -29   3  19 11.8803 13.0566   2
  31   3   9 49.4798 14.6712  -1
 -31   3  19 49.4798 14.6712   2
  33   3   9 -3.1533 10.8406  -1
 -33   3  20 -3.1533 10.8406   2
 -32   4   9 41.3223 13.7805  -1
 -32   4   2 41.3223 13.7805   2
 -30   4   9 37.4872 6.09446  -1
 -30   4   1 37.4872 6.09446   2
 -28   4   9 40.6216 5.35796  -1
  28   4   0 40.6216 5.35796   2
 -26   4   9 67.9309 4.82187  -1
  26   4   0 67.9309 4.82187   2
 -24   4   9 75.8870 3.22685  -1
  24   4   1 75.8870 3.22685   2
 -22   4   9 4.19039 3.27128  -1
  22   4   2 4.19039 3.27128   2
 -20   4   9 1.66632 2.79441  -1
  20   4   2 1.66632 2.79441   2
 -18   4   9 299.252 4.42226  -1
  18   4   3 299.252 4.42226   2
 -16   4   9 315.852 5.48983  -1
  16   4   4 315.852 5.48983   2
 -14   4   9 327.189 5.34482  -1
  14   4   4 327.189 5.34482   2
 -12   4   9 242.734 2.71448  -1
  12   4   5 242.734 2.71448   2
 -10   4   9 194.640 3.09893  -1
  10   4   6 194.640 3.09893   2
  -8   4   9 562.853 8.22019  -1
   8   4   6 562.853 8.22019   2
  -6   4   9 182.962 1.99156  -1
   6   4   7 182.962 1.99156   2
  -4   4   9 234.567 4.09705  -1
   4   4   8 234.567 4.09705   2
  -2   4   9 461.083 7.44726  -1
   2   4   8 461.083 7.44726   2
   0   4   9 1032.02 9.20427  -1
   0   4   9 1032.02 9.20427   2
   2   4   9 683.380 7.59078  -1
  -2   4  10 683.380 7.59078   2
   4   4   9 515.062 5.65185  -1
  -4   4  10 515.062 5.65185   2
   6   4   9 437.695 4.07950  -1
  -6   4  11 437.695 4.07950   2
   8   4   9 372.388 4.79070  -1
  -8   4  12 372.388 4.79070   2
  10   4   9 176.707 3.01582  -1
 -10   4  12 176.707 3.01582   2
  12   4   9 202.794 3.00688  -1
 -12   4  13 202.794 3.00688   2
  14   4   9 16.1426 2.71321  -1
 -14   4  14 16.1426 2.71321   2
  16   4   9 88.8359 3.69678  -1
 -16   4  14 88.8359 3.69678   2
  18   4   9 140.780 3.53881  -1
 -18   4  15 140.780 3.53881   2
  20   4   9 66.2998 5.58334  -1
 -20   4  16 66.2998 5.58334   2
  22   4   9 21.7169 5.31000  -1
 -22   4  16 21.7169 5.31000   2
  24   4   9 19.2968 3.50961  -1
 -24   4  17 19.2968 3.50961   2
  26   4   9 -5.2268 11.6744  -1
 -26   4  18 -5.2268 11.6744   2
  28   4   9 11.7806 13.1335  -1
 -28   4  18 11.7806 13.1335   2
  30   4   9 13.2633 5.44626  -1
 -30   4  19 13.2633 5.44626   2
  32   4   9 23.3865 14.4837  -1
 -32   4  20 23.3865 14.4837   2
 -33   5   9 19.7521 11.9124  -1
 -33   5   2 19.7521 11.9124   2
 -31   5   9 67.9240 11.0683  -1
 -31   5   1 67.9240 11.0683   2
 -29   5   9 36.0473 8.97907  -1
 -29   5   1 36.0473 8.97907   2
 -27   5   9 21.4978 3.25112  -1
  27   5   0 21.4978 3.25112   2
 -25   5   9 112.196 5.09680  -1
  25   5   1 112.196 5.09680   2
 -23   5   9 66.6122 4.47744  -1
  23   5   1 66.6122 4.47744   2
 -21   5   9 11.9319 2.30106  -1
  21   5   2 11.9319 2.30106   2
 -19   5   9 31.3733 2.71706  -1
  19   5   3 31.3733 2.71706   2
 -17   5   9 60.9528 2.99825  -1
  17   5   3 60.9528 2.99825   2
 -15   5   9 121.714 2.18437  -1
  15   5   4 121.714 2.18437   2
 -13   5   9 113.096 3.03861  -1
  13   5   5 113.096 3.03861   2
 -11   5   9 32.2583 2.09654  -1
  11   5   5 32.2583 2.09654   2
  -9   5   9 67.8499 1.32176  -1
   9   5   6 67.8499 1.32176   2
  -7   5   9 7.07071 1.71081  -1
   7   5   7 7.07071 1.71081   2
  -5   5   9 1.55399 1.95011  -1
   5   5   7 1.55399 1.95011   2
  -3   5   9 158.118 1.99131  -1
   3   5   8 158.118 1.99131   2
  -1   5   9 954.601 11.3762  -1
   1   5   9 954.601 11.3762   2
   1   5   9 919.681 10.0996  -1
  -1   5   9 919.681 10.0996   2
   3   5   9 632.697 5.62466  -1
  -3   5  10 632.697 5.62466   2
   5   5   9 874.682 9.88781  -1
  -5   5  11 874.682 9.88781   2
   7   5   9 578.828 6.67762  -1
  -7   5  11 578.828 6.67762   2
   9   5   9 240.540 3.24610  -1
  -9   5  12 240.540 3.24610   2
  11   5   9 450.288 7.06839  -1
 -11   5  13 450.288 7.06839   2
  13   5   9 148.337 3.79224  -1
 -13   5  13 148.337 3.79224   2
  15   5   9 59.0239 2.36953  -1
 -15   5  14 59.0239 2.36953   2
  17   5   9 57.8252 3.89201  -1
 -17   5  15 57.8252 3.89201   2
  19   5   9 30.9156 3.88920  -1
 -19   5  15 30.9156 3.88920   2
  21   5   9 16.8862 2.60282  -1
 -21   5  16 16.8862 2.60282   2
  23   5   9 15.0282 5.50850  -1
 -23   5  17 15.0282 5.50850   2
  25   5   9 2.64129 7.28957  -1
 -25   5  17 2.64129 7.28957   2
  27   5   9 15.4938 5.14876  -1
 -27   5  18 15.4938 5.14876   2
  29   5   9 1.59248 13.0549  -1
 -29   5  19 1.59248 13.0549   2
  31   5   9 11.5935 15.1104  -1
 -31   5  19 11.5935 15.1104   2
 -30   6   9 31.1908 6.41864  -1
 -30   6   1 31.1908 6.41864   2
 -28   6   9 7.64231 9.31510  -1
  28   6   0 7.64231 9.31510   2
 -26   6   9 24.5796 6.18865  -1
  26   6   0 24.5796 6.18865   2
 -24   6   9 31.5697 3.14373  -1
  24   6   1 31.5697 3.14373   2
 -22   6   9 31.2314 3.45156  -1
  22   6   2 31.2314 3.45156   2
 -20   6   9 3.20427 2.89991  -1
  20   6   2 3.20427 2.89991   2
 -18   6   9 17.6665 1.79520  -1
  18   6   3 17.6665 1.79520   2
 -16   6   9 295.264 5.87653  -1
  16   6   4 295.264 5.87653   2
 -14   6   9 167.088 3.66981  -1
  14   6   4 167.088 3.66981   2
 -12   6   9 6.14843 1.17160  -1
  12   6   5 6.14843 1.17160   2
 -10   6   9 194.980 3.80377  -1
  10   6   6 194.980 3.80377   2
  -8   6   9 280.104 4.08514  -1
   8   6   6 280.104 4.08514   2
  -6   6   9 30.6545 1.00198  -1
   6   6   7 30.6545 1.00198   2
  -4   6   9 260.077 4.59848  -1
   4   6   8 260.077 4.59848   2
  -2   6   9 498.343 6.99475  -1
   2   6   8 498.343 6.99475   2
   0   6   9 440.007 4.03458  -1
   0   6   9 440.007 4.03458   2
   2   6   9 190.970 3.43069  -1
  -2   6  10 190.970 3.43069   2
   4   6   9 254.989 3.93272  -1
  -4   6  10 254.989 3.93272   2
   6   6   9 388.017 3.88854  -1
  -6   6  11 388.017 3.88854   2
   8   6   9 170.031 3.50288  -1
  -8   6  12 170.031 3.50288   2
  10   6   9 12.2182 2.49189  -1
 -10   6  12 12.2182 2.49189   2
  12   6   9 139.575 3.21586  -1
 -12   6  13 139.575 3.21586   2
  14   6   9 142.596 4.80411  -1
 -14   6  14 142.596 4.80411   2
  16   6   9 87.6473 4.62893  -1
 -16   6  14 87.6473 4.62893   2
  18   6   9 6.51686 2.31903  -1
 -18   6  15 6.51686 2.31903   2
  20   6   9 71.1057 5.77636  -1
 -20   6  16 71.1057 5.77636   2
  22   6   9 134.134 6.78039  -1
 -22   6  16 134.134 6.78039   2
  24   6   9 0.67519 3.36127  -1
 -24   6  17 0.67519 3.36127   2
  26   6   9 43.5675 13.6234  -1
 -26   6  18 43.5675 13.6234   2
  28   6   9 44.5005 14.9735  -1
 -28   6  18 44.5005 14.9735   2
  30   6   9 2.49061 11.1706  -1
 -30   6  19 2.49061 11.1706   2
 -33   7   9 4.30718 12.4681  -1
 -33   7   2 4.30718 12.4681   2
 -29   7   9 -15.523 9.13124  -1
 -29   7   1 -15.523 9.13124   2
 -27   7   9 -0.3314 4.86104  -1
  27   7   0 -0.3314 4.86104   2
 -25   7   9 -4.8483 5.04485  -1
  25   7   1 -4.8483 5.04485   2
 -23   7   9 0.21960 5.41670  -1
  23   7   1 0.21960 5.41670   2
 -21   7   9 11.4137 2.75785  -1
  21   7   2 11.4137 2.75785   2
 -19   7   9 7.71244 2.78854  -1
  19   7   3 7.71244 2.78854   2
 -17   7   9 -0.0900 2.70643  -1
  17   7   3 -0.0900 2.70643   2
 -15   7   9 322.144 4.64539  -1
  15   7   4 322.144 4.64539   2
 -13   7   9 2.32933 2.57889  -1
  13   7   5 2.32933 2.57889   2
 -11   7   9 1.57856 2.40634  -1
  11   7   5 1.57856 2.40634   2
  -9   7   9 611.396 6.71651  -1
   9   7   6 611.396 6.71651   2
  -7   7   9 8.68536 1.90351  -1
   7   7   7 8.68536 1.90351   2
  -5   7   9 33.1371 2.04962  -1
   5   7   7 33.1371 2.04962   2
  -3   7   9 302.406 3.33528  -1
   3   7   8 302.406 3.33528   2
  -1   7   9 19.5854 2.23096  -1
   1   7   9 19.5854 2.23096   2
   1   7   9 20.8558 1.89525  -1
  -1   7   9 20.8558 1.89525   2
   3   7   9 5.32742 0.95602  -1
  -3   7  10 5.32742 0.95602   2
   5   7   9 118.082 3.26793  -1
  -5   7  11 118.082 3.26793   2
   7   7   9 15.7092 2.29254  -1
  -7   7  11 15.7092 2.29254   2
   9   7   9 37.5158 1.69080  -1
  -9   7  12 37.5158 1.69080   2
  11   7   9 48.2586 3.27012  -1
 -11   7  13 48.2586 3.27012   2
  13   7   9 25.1763 3.68507  -1
 -13   7  13 25.1763 3.68507   2
  15   7   9 84.0264 3.22661  -1
 -15   7  14 84.0264 3.22661   2
  17   7   9 13.5385 4.48363  -1
 -17   7  15 13.5385 4.48363   2
  19   7   9 9.17433 5.00907  -1
 -19   7  15 9.17433 5.00907   2
  21   7   9 141.962 4.20957  -1
 -21   7  16 141.962 4.20957   2
  23   7   9 5.88948 5.65800  -1
 -23   7  17 5.88948 5.65800   2
  25   7   9 14.2062 13.1454  -1
 -25   7  17 14.2062 13.1454   2
  27   7   9 15.1563 6.37129  -1
 -27   7  18 15.1563 6.37129   2
  29   7   9 3.47953 15.0478  -1
 -29   7  19 3.47953 15.0478   2
 -30   8   9 6.09204 8.36761  -1
 -30   8   1 6.09204 8.36761   2
 -28   8   9 -7.1988 15.0917  -1
  28   8   0 -7.1988 15.0917   2
 -26   8   9 31.9523 9.62893  -1
  26   8   0 31.9523 9.62893   2
 -24   8   9 22.3174 4.29467  -1
  24   8   1 22.3174 4.29467   2
 -22   8   9 1.17281 3.99052  -1
  22   8   2 1.17281 3.99052   2
 -20   8   9 2.46389 3.89292  -1
  20   8   2 2.46389 3.89292   2
 -18   8   9 4.97891 2.34175  -1
  18   8   3 4.97891 2.34175   2
 -16   8   9 170.946 4.69589  -1
  16   8   4 170.946 4.69589   2
 -14   8   9 117.579 3.71561  -1
  14   8   4 117.579 3.71561   2
 -12   8   9 13.0817 1.82561  -1
  12   8   5 13.0817 1.82561   2
 -10   8   9 290.935 5.23555  -1
  10   8   6 290.935 5.23555   2
  -8   8   9 126.766 3.34424  -1
   8   8   6 126.766 3.34424   2
  -6   8   9 11.5535 1.26059  -1
   6   8   7 11.5535 1.26059   2
  -4   8   9 147.369 2.98746  -1
   4   8   8 147.369 2.98746   2
  -2   8   9 214.124 3.94254  -1
   2   8   8 214.124 3.94254   2
   0   8   9 160.348 2.51645  -1
   0   8   9 160.348 2.51645   2
   2   8   9 69.1305 3.09445  -1
  -2   8  10 69.1305 3.09445   2
   4   8   9 45.3392 2.32168  -1
  -4   8  10 45.3392 2.32168   2
   6   8   9 196.815 2.82599  -1
  -6   8  11 196.815 2.82599   2
   8   8   9 46.9322 2.96096  -1
  -8   8  12 46.9322 2.96096   2
  10   8   9 4.73724 3.08777  -1
 -10   8  12 4.73724 3.08777   2
  12   8   9 28.6638 2.47136  -1
 -12   8  13 28.6638 2.47136   2
  14   8   9 45.3570 4.49047  -1
 -14   8  14 45.3570 4.49047   2
  16   8   9 30.6273 5.05427  -1
 -16   8  14 30.6273 5.05427   2
  18   8   9 4.48569 2.34779  -1
 -18   8  15 4.48569 2.34779   2
  20   8   9 91.3386 6.32166  -1
 -20   8  16 91.3386 6.32166   2
  22   8   9 57.6488 7.72776  -1
 -22   8  16 57.6488 7.72776   2
  24   8   9 6.09341 4.85920  -1
 -24   8  17 6.09341 4.85920   2
  26   8   9 17.9529 14.1217  -1
 -26   8  18 17.9529 14.1217   2
  28   8   9 22.6918 15.6586  -1
 -28   8  18 22.6918 15.6586   2
 -27   9   9 21.3002 5.81515  -1
  27   9   0 21.3002 5.81515   2
 -25   9   9 96.0282 16.4868  -1
  25   9   1 96.0282 16.4868   2
 -23   9   9 38.3546 8.96341  -1
  23   9   1 38.3546 8.96341   2
 -21   9   9 28.0532 3.38305  -1
  21   9   2 28.0532 3.38305   2
 -19   9   9 17.3727 4.43568  -1
  19   9   3 17.3727 4.43568   2
 -17   9   9 3.72080 3.61802  -1
  17   9   3 3.72080 3.61802   2
 -15   9   9 68.5364 2.97783  -1
  15   9   4 68.5364 2.97783   2
 -13   9   9 7.33817 3.35217  -1
  13   9   5 7.33817 3.35217   2
 -11   9   9 -0.3576 3.13931  -1
  11   9   5 -0.3576 3.13931   2
  -9   9   9 132.452 2.86024  -1
   9   9   6 132.452 2.86024   2
  -7   9   9 34.8310 2.52800  -1
   7   9   7 34.8310 2.52800   2
  -5   9   9 48.7571 2.79664  -1
   5   9   7 48.7571 2.79664   2
  -3   9   9 236.945 3.32814  -1
   3   9   8 236.945 3.32814   2
  -1   9   9 465.843 6.81130  -1
   1   9   9 465.843 6.81130   2
   1   9   9 461.142 6.73864  -1
  -1   9   9 461.142 6.73864   2
   3   9   9 192.161 3.11615  -1
  -3   9  10 192.161 3.11615   2
   5   9   9 469.092 6.75218  -1
  -5   9  11 469.092 6.75218   2
   7   9   9 367.673 5.77518  -1
  -7   9  11 367.673 5.77518   2
   9   9   9 63.5145 2.34515  -1
  -9   9  12 63.5145 2.34515   2
  11   9   9 209.692 6.16440  -1
 -11   9  13 209.692 6.16440   2
  13   9   9 172.588 6.91877  -1
 -13   9  13 172.588 6.91877   2
  15   9   9 28.6334 2.71643  -1
 -15   9  14 28.6334 2.71643   2
  17   9   9 11.5018 4.80509  -1
 -17   9  15 11.5018 4.80509   2
  19   9   9 9.78123 5.47909  -1
 -19   9  15 9.78123 5.47909   2
  21   9   9 11.3380 3.61149  -1
 -21   9  16 11.3380 3.61149   2
  23   9   9 7.48217 9.21193  -1
 -23   9  17 7.48217 9.21193   2
  25   9   9 7.83513 10.2456  -1
 -25   9  17 7.83513 10.2456   2
  27   9   9 21.4296 11.3588  -1
 -27   9  18 21.4296 11.3588   2
 -26  10   9 51.6707 15.1399  -1
  26  10   0 51.6707 15.1399   2
 -24  10   9 24.1318 5.87385  -1
  24  10   1 24.1318 5.87385   2
 -22  10   9 24.8241 9.97385  -1
  22  10   2 24.8241 9.97385   2
 -20  10   9 37.4706 6.63189  -1
  20  10   2 37.4706 6.63189   2
 -18  10   9 25.3877 3.30775  -1
  18  10   3 25.3877 3.30775   2
 -16  10   9 46.4917 5.43467  -1
  16  10   4 46.4917 5.43467   2
 -14  10   9 78.0943 4.60615  -1
  14  10   4 78.0943 4.60615   2
 -12  10   9 24.8708 2.35863  -1
  12  10   5 24.8708 2.35863   2
 -10  10   9 15.4107 3.72594  -1
  10  10   6 15.4107 3.72594   2
  -8  10   9 6.91072 2.96264  -1
   8  10   6 6.91072 2.96264   2
  -6  10   9 30.3983 1.95077  -1
   6  10   7 30.3983 1.95077   2
  -4  10   9 62.8193 3.31129  -1
   4  10   8 62.8193 3.31129   2
  -2  10   9 171.798 4.33576  -1
   2  10   8 171.798 4.33576   2
   0  10   9 233.051 3.64899  -1
   0  10   9 233.051 3.64899   2
   2  10   9 209.655 4.76360  -1
  -2  10  10 209.655 4.76360   2
   4  10   9 204.795 4.39472  -1
  -4  10  10 204.795 4.39472   2
   6  10   9 219.948 3.95731  -1
  -6  10  11 219.948 3.95731   2
   8  10   9 180.999 5.43586  -1
  -8  10  12 180.999 5.43586   2
  10  10   9 73.8408 4.77221  -1
 -10  10  12 73.8408 4.77221   2
  12  10   9 82.3199 3.47749  -1
 -12  10  13 82.3199 3.47749   2
  14  10   9 23.9205 5.37992  -1
 -14  10  14 23.9205 5.37992   2
  16  10   9 32.0598 5.49227  -1
 -16  10  14 32.0598 5.49227   2
  18  10   9 14.8695 3.27053  -1
 -18  10  15 14.8695 3.27053   2
  20  10   9 9.44442 7.49159  -1
 -20  10  16 9.44442 7.49159   2
  22  10   9 5.12984 9.55632  -1
 -22  10  16 5.12984 9.55632   2
  24  10   9 -2.9494 10.1352  -1
 -24  10  17 -2.9494 10.1352   2
  26  10   9 -5.4411 14.6589  -1
 -26  10  18 -5.4411 14.6589   2
 -27  11   9 8.79268 11.7383  -1
  27  11   0 8.79268 11.7383   2
 -23  11   9 -6.7168 10.1611  -1
  23  11   1 -6.7168 10.1611   2
 -21  11   9 0.26293 5.82545  -1
  21  11   2 0.26293 5.82545   2
 -19  11   9 40.5150 8.31617  -1
  19  11   3 40.5150 8.31617   2
 -17  11   9 65.9994 6.57782  -1
  17  11   3 65.9994 6.57782   2
 -15  11   9 166.915 4.71525  -1
  15  11   4 166.915 4.71525   2
 -13  11   9 174.469 5.59117  -1
  13  11   5 174.469 5.59117   2
 -11  11   9 116.917 5.45113  -1
  11  11   5 116.917 5.45113   2
  -9  11   9 114.482 3.52654  -1
   9  11   6 114.482 3.52654   2
  -7  11   9 120.556 4.54023  -1
   7  11   7 120.556 4.54023   2
  -5  11   9 54.3862 3.84920  -1
   5  11   7 54.3862 3.84920   2
  -3  11   9 8.53662 1.79311  -1
   3  11   8 8.53662 1.79311   2
  -1  11   9 66.0835 3.86948  -1
   1  11   9 66.0835 3.86948   2
   1  11   9 65.0780 4.07999  -1
  -1  11   9 65.0780 4.07999   2
   3  11   9 100.864 2.80044  -1
  -3  11  10 100.864 2.80044   2
   5  11   9 86.4927 3.86019  -1
  -5  11  11 86.4927 3.86019   2
   7  11   9 38.8921 4.08635  -1
  -7  11  11 38.8921 4.08635   2
   9  11   9 35.0598 2.77127  -1
  -9  11  12 35.0598 2.77127   2
  11  11   9 54.8750 5.26489  -1
 -11  11  13 54.8750 5.26489   2
  13  11   9 57.9571 6.29377  -1
 -13  11  13 57.9571 6.29377   2
  15  11   9 51.0450 3.45019  -1
 -15  11  14 51.0450 3.45019   2
  17  11   9 80.8793 8.08632  -1
 -17  11  15 80.8793 8.08632   2
  19  11   9 94.9997 9.05060  -1
 -19  11  15 94.9997 9.05060   2
  21  11   9 46.8475 7.20781  -1
 -21  11  16 46.8475 7.20781   2
  23  11   9 36.1577 13.9648  -1
 -23  11  17 36.1577 13.9648   2
 -22  12   9 15.9212 16.6574  -1
  22  12   2 15.9212 16.6574   2
 -20  12   9 33.0617 13.7520  -1
  20  12   2 33.0617 13.7520   2
 -18  12   9 32.5075 4.81720  -1
  18  12   3 32.5075 4.81720   2
 -16  12   9 74.9872 7.41602  -1
  16  12   4 74.9872 7.41602   2
 -14  12   9 106.690 6.86397  -1
  14  12   4 106.690 6.86397   2
 -12  12   9 174.114 4.90063  -1
  12  12   5 174.114 4.90063   2
 -10  12   9 141.128 5.89250  -1
  10  12   6 141.128 5.89250   2
  -8  12   9 108.000 6.15229  -1
   8  12   6 108.000 6.15229   2
  -6  12   9 116.343 3.35649  -1
   6  12   7 116.343 3.35649   2
  -4  12   9 31.1352 4.26335  -1
   4  12   8 31.1352 4.26335   2
  -2  12   9 32.6468 4.02472  -1
   2  12   8 32.6468 4.02472   2
   0  12   9 13.7157 2.09473  -1
   0  12   9 13.7157 2.09473   2
   2  12   9 28.9961 3.86057  -1
  -2  12  10 28.9961 3.86057   2
   4  12   9 10.3960 3.97293  -1
  -4  12  10 10.3960 3.97293   2
   6  12   9 1.91296 2.45950  -1
  -6  12  11 1.91296 2.45950   2
   8  12   9 4.95267 4.99043  -1
  -8  12  12 4.95267 4.99043   2
  10  12   9 5.21336 6.02714  -1
 -10  12  12 5.21336 6.02714   2
  12  12   9 37.3249 3.34737  -1
 -12  12  13 37.3249 3.34737   2
  14  12   9 87.1258 8.15272  -1
 -14  12  14 87.1258 8.15272   2
  16  12   9 78.9024 8.61622  -1
 -16  12  14 78.9024 8.61622   2
  18  12   9 84.8143 7.54448  -1
 -18  12  15 84.8143 7.54448   2
  20  12   9 12.9105 14.5741  -1
 -20  12  16 12.9105 14.5741   2
 -17  13   9 28.4647 14.1081  -1
  17  13   3 28.4647 14.1081   2
 -15  13   9 2.40123 5.51221  -1
  15  13   4 2.40123 5.51221   2
 -13  13   9 87.9374 9.15283  -1
  13  13   5 87.9374 9.15283   2
 -11  13   9 78.3702 8.18012  -1
  11  13   5 78.3702 8.18012   2
  -9  13   9 3.76393 3.10817  -1
   9  13   6 3.76393 3.10817   2
  -7  13   9 79.1470 7.22440  -1
   7  13   7 79.1470 7.22440   2
  -5  13   9 74.5416 5.77648  -1
   5  13   7 74.5416 5.77648   2
  -3  13   9 27.1347 2.71500  -1
   3  13   8 27.1347 2.71500   2
  -1  13   9 20.0738 4.42210  -1
   1  13   9 20.0738 4.42210   2
   1  13   9 19.8795 4.34069  -1
  -1  13   9 19.8795 4.34069   2
   3  13   9 53.7455 2.96951  -1
  -3  13  10 53.7455 2.96951   2
   5  13   9 -2.5343 4.28412  -1
  -5  13  11 -2.5343 4.28412   2
   7  13   9 -9.9536 5.80642  -1
  -7  13  11 -9.9536 5.80642   2
   9  13   9 57.5274 4.13135  -1
  -9  13  12 57.5274 4.13135   2
  11  13   9 2.27966 6.25122  -1
 -11  13  13 2.27966 6.25122   2
  13  13   9 29.1244 10.3462  -1
 -13  13  13 29.1244 10.3462   2
  15  13   9 39.9156 5.92116  -1
 -15  13  14 39.9156 5.92116   2
  17  13   9 52.0831 14.7988  -1
 -17  13  15 52.0831 14.7988   2
 -14  14   9 19.1899 11.1212  -1
  14  14   4 19.1899 11.1212   2
 -12  14   9 11.6507 5.21506  -1
  12  14   5 11.6507 5.21506   2
 -10  14   9 7.18694 10.2678  -1
  10  14   6 7.18694 10.2678   2
  -8  14   9 11.3040 8.07399  -1
   8  14   6 11.3040 8.07399   2
  -6  14   9 3.65839 3.33345  -1
   6  14   7 3.65839 3.33345   2
  -4  14   9 11.2202 6.00140  -1
   4  14   8 11.2202 6.00140   2
  -2  14   9 8.63360 6.15339  -1
   2  14   8 8.63360 6.15339   2
   0  14   9 -2.1820 2.60178  -1
   0  14   9 -2.1820 2.60178   2
   2  14   9 112.269 6.11587  -1
  -2  14  10 112.269 6.11587   2
   4  14   9 72.0610 6.27830  -1
  -4  14  10 72.0610 6.27830   2
   6  14   9 3.42650 3.23401  -1
  -6  14  11 3.42650 3.23401   2
   8  14   9 133.532 10.3427  -1
  -8  14  12 133.532 10.3427   2
  10  14   9 77.2712 15.3433  -1
 -10  14  12 77.2712 15.3433   2
  12  14   9 12.2396 7.31231  -1
 -12  14  13 12.2396 7.31231   2
  14  14   9 0.94196 13.7359  -1
 -14  14  14 0.94196 13.7359   2
 -13  15   9 17.1043 15.6994  -1
  13  15   5 17.1043 15.6994   2
 -11  15   9 14.5370 15.6192  -1
  11  15   5 14.5370 15.6192   2
  -9  15   9 12.9778 7.30286  -1
   9  15   6 12.9778 7.30286   2
  -7  15   9 16.7379 10.9956  -1
   7  15   7 16.7379 10.9956   2
  -5  15   9 33.3741 8.26553  -1
   5  15   7 33.3741 8.26553   2
  -3  15   9 20.9605 4.91227  -1
   3  15   8 20.9605 4.91227   2
  -1  15   9 16.3538 6.77941  -1
   1  15   9 16.3538 6.77941   2
   1  15   9 14.7713 7.73652  -1
  -1  15   9 14.7713 7.73652   2
   3  15   9 57.3025 5.53310  -1
  -3  15  10 57.3025 5.53310   2
   5  15   9 1.15755 7.76751  -1
  -5  15  11 1.15755 7.76751   2
   7  15   9 18.5990 13.6997  -1
  -7  15  11 18.5990 13.6997   2
   9  15   9 56.6934 8.14655  -1
  -9  15  12 56.6934 8.14655   2
  -4  16   9 11.3274 14.5688  -1
   4  16   8 11.3274 14.5688   2
  -2  16   9 19.8036 14.5758  -1
   2  16   8 19.8036 14.5758   2
   0  16   9 21.1368 10.1095  -1
   0  16   9 21.1368 10.1095   2
 -32   0  10 49.0676 14.0552  -1
 -32   0   1 49.0676 14.0552   2
 -30   0  10 73.5953 11.1010  -1
  30   0   0 73.5953 11.1010   2
 -28   0  10 58.5998 12.6350  -1
  28   0   1 58.5998 12.6350   2
 -26   0  10 28.0931 5.59975  -1
  26   0   1 28.0931 5.59975   2
 -24   0  10 100.346 4.71499  -1
  24   0   2 100.346 4.71499   2
 -22   0  10 -5.0711 3.81794  -1
  22   0   3 -5.0711 3.81794   2
 -20   0  10 88.3246 3.97304  -1
  20   0   3 88.3246 3.97304   2
 -18   0  10 8.97753 1.61735  -1
  18   0   4 8.97753 1.61735   2
 -16   0  10 17.3603 3.44223  -1
  16   0   5 17.3603 3.44223   2
 -14   0  10 37.5807 2.82881  -1
  14   0   5 37.5807 2.82881   2
 -12   0  10 145.020 2.87635  -1
  12   0   6 145.020 2.87635   2
 -10   0  10 157.446 4.50789  -1
  10   0   7 157.446 4.50789   2
  -8   0  10 948.234 18.0915  -1
   8   0   7 948.234 18.0915   2
  -6   0  10 2086.16 31.5210  -1
   6   0   8 2086.16 31.5210   2
  -4   0  10 783.837 13.2845  -1
   4   0   9 783.837 13.2845   2
  -2   0  10 2969.58 47.4618  -1
   2   0   9 2969.58 47.4618   2
   0   0  10 2656.06 39.2093  -1
   0   0  10 2656.06 39.2093   2
   2   0  10 1231.91 22.8977  -1
  -2   0  11 1231.91 22.8977   2
   4   0  10 1280.59 27.4954  -1
  -4   0  11 1280.59 27.4954   2
   6   0  10 2087.12 28.6076  -1
  -6   0  12 2087.12 28.6076   2
   8   0  10 227.341 5.81943  -1
  -8   0  13 227.341 5.81943   2
  10   0  10 0.71579 3.85723  -1
 -10   0  13 0.71579 3.85723   2
  12   0  10 20.3811 2.12830  -1
 -12   0  14 20.3811 2.12830   2
  14   0  10 5.12283 3.03533  -1
 -14   0  15 5.12283 3.03533   2
  16   0  10 3.33638 3.84867  -1
 -16   0  15 3.33638 3.84867   2
  18   0  10 117.587 4.05159  -1
 -18   0  16 117.587 4.05159   2
  20   0  10 9.84581 4.79053  -1
 -20   0  17 9.84581 4.79053   2
  22   0  10 57.0561 10.4729  -1
 -22   0  17 57.0561 10.4729   2
  24   0  10 89.6098 6.19538  -1
 -24   0  18 89.6098 6.19538   2
 -35   1  10 25.1228 14.3839  -1
 -35   1   2 25.1228 14.3839   2
 -33   1  10 24.7839 10.7643  -1
 -33   1   1 24.7839 10.7643   2
 -31   1  10 57.0033 14.3101  -1
  31   1   0 57.0033 14.3101   2
 -29   1  10 92.1441 5.24254  -1
  29   1   0 92.1441 5.24254   2
 -27   1  10 12.2416 2.82347  -1
  27   1   1 12.2416 2.82347   2
 -25   1  10 62.9499 5.02062  -1
  25   1   2 62.9499 5.02062   2
 -23   1  10 89.6944 3.39027  -1
  23   1   2 89.6944 3.39027   2
 -21   1  10 94.6890 2.39538  -1
  21   1   3 94.6890 2.39538   2
 -19   1  10 67.1426 3.13510  -1
  19   1   4 67.1426 3.13510   2
 -17   1  10 14.5310 1.92949  -1
  17   1   4 14.5310 1.92949   2
 -15   1  10 248.107 2.69848  -1
  15   1   5 248.107 2.69848   2
 -13   1  10 125.365 2.78277  -1
  13   1   6 125.365 2.78277   2
 -11   1  10 94.4497 2.32058  -1
  11   1   6 94.4497 2.32058   2
  -9   1  10 813.236 7.41200  -1
   9   1   7 813.236 7.41200   2
  -7   1  10 588.310 7.50534  -1
   7   1   8 588.310 7.50534   2
  -5   1  10 1312.08 15.6637  -1
   5   1   8 1312.08 15.6637   2
  -3   1  10 350.063 3.87757  -1
   3   1   9 350.063 3.87757   2
  -1   1  10 2488.85 27.3182  -1
   1   1  10 2488.85 27.3182   2
   1   1  10 2444.53 28.0117  -1
  -1   1  10 2444.53 28.0117   2
   3   1  10 411.351 4.28472  -1
  -3   1  11 411.351 4.28472   2
   5   1  10 364.376 4.98163  -1
  -5   1  12 364.376 4.98163   2
   7   1  10 1351.96 14.9488  -1
  -7   1  12 1351.96 14.9488   2
   9   1  10 -0.0246 0.82660  -1
  -9   1  13 -0.0246 0.82660   2
  11   1  10 14.1361 1.78706  -1
 -11   1  14 14.1361 1.78706   2
  13   1  10 124.734 2.98034  -1
 -13   1  14 124.734 2.98034   2
  15   1  10 95.0728 2.19080  -1
 -15   1  15 95.0728 2.19080   2
  17   1  10 14.9231 2.86919  -1
 -17   1  16 14.9231 2.86919   2
  19   1  10 5.80452 3.06230  -1
 -19   1  16 5.80452 3.06230   2
  21   1  10 123.566 3.77619  -1
 -21   1  17 123.566 3.77619   2
  23   1  10 41.9197 11.0923  -1
 -23   1  18 41.9197 11.0923   2
  25   1  10 18.4336 10.9383  -1
 -25   1  18 18.4336 10.9383   2
  27   1  10 42.2296 7.25349  -1
 -27   1  19 42.2296 7.25349   2
 -36   2  10 8.00824 11.7791  -1
 -36   2   2 8.00824 11.7791   2
 -32   2  10 -3.0744 8.86247  -1
 -32   2   1 -3.0744 8.86247   2
 -30   2  10 3.74102 4.33617  -1
  30   2   0 3.74102 4.33617   2
 -28   2  10 1.21819 5.32886  -1
  28   2   1 1.21819 5.32886   2
 -26   2  10 8.88572 3.97131  -1
  26   2   1 8.88572 3.97131   2
 -24   2  10 34.0643 2.59455  -1
  24   2   2 34.0643 2.59455   2
 -22   2  10 78.7116 3.61160  -1
  22   2   3 78.7116 3.61160   2
 -20   2  10 224.248 4.00720  -1
  20   2   3 224.248 4.00720   2
 -18   2  10 304.746 3.73195  -1
  18   2   4 304.746 3.73195   2
 -16   2  10 844.301 12.0220  -1
  16   2   5 844.301 12.0220   2
 -14   2  10 598.039 7.70097  -1
  14   2   5 598.039 7.70097   2
 -12   2  10 294.072 2.93668  -1
  12   2   6 294.072 2.93668   2
 -10   2  10 966.220 11.6378  -1
  10   2   7 966.220 11.6378   2
  -8   2  10 992.409 12.2279  -1
   8   2   7 992.409 12.2279   2
  -6   2  10 186.584 2.16546  -1
   6   2   8 186.584 2.16546   2
  -4   2  10 19.7974 1.19051  -1
   4   2   9 19.7974 1.19051   2
  -2   2  10 157.109 2.78699  -1
   2   2   9 157.109 2.78699   2
   0   2  10 231.237 2.66751  -1
   0   2  10 231.237 2.66751   2
   2   2  10 44.9435 1.99795  -1
  -2   2  11 44.9435 1.99795   2
   4   2  10 1.07624 1.39600  -1
  -4   2  11 1.07624 1.39600   2
   6   2  10 106.114 1.47002  -1
  -6   2  12 106.114 1.47002   2
   8   2  10 138.164 2.96666  -1
  -8   2  13 138.164 2.96666   2
  10   2  10 116.464 2.53142  -1
 -10   2  13 116.464 2.53142   2
  12   2  10 177.358 2.75140  -1
 -12   2  14 177.358 2.75140   2
  14   2  10 459.699 8.97408  -1
 -14   2  15 459.699 8.97408   2
  16   2  10 318.071 6.36764  -1
 -16   2  15 318.071 6.36764   2
  18   2  10 69.1731 2.19498  -1
 -18   2  16 69.1731 2.19498   2
  20   2  10 159.367 5.31042  -1
 -20   2  17 159.367 5.31042   2
  22   2  10 163.300 9.76853  -1
 -22   2  17 163.300 9.76853   2
  24   2  10 12.0867 3.29435  -1
 -24   2  18 12.0867 3.29435   2
  26   2  10 2.29880 11.6626  -1
 -26   2  19 2.29880 11.6626   2
  28   2  10 44.1893 13.0154  -1
 -28   2  19 44.1893 13.0154   2
  30   2  10 -1.8157 7.39466  -1
 -30   2  20 -1.8157 7.39466   2
 -33   3  10 2.66712 7.30350  -1
 -33   3   1 2.66712 7.30350   2
 -31   3  10 14.6948 8.96245  -1
  31   3   0 14.6948 8.96245   2
 -29   3  10 13.4447 6.05959  -1
  29   3   0 13.4447 6.05959   2
 -27   3  10 24.8625 3.00265  -1
  27   3   1 24.8625 3.00265   2
 -25   3  10 31.7199 4.06672  -1
  25   3   2 31.7199 4.06672   2
 -23   3  10 32.9339 3.69709  -1
  23   3   2 32.9339 3.69709   2
 -21   3  10 94.6985 2.88412  -1
  21   3   3 94.6985 2.88412   2
 -19   3  10 143.516 4.17609  -1
  19   3   4 143.516 4.17609   2
 -17   3  10 223.099 3.72002  -1
  17   3   4 223.099 3.72002   2
 -15   3  10 488.475 5.06652  -1
  15   3   5 488.475 5.06652   2
 -13   3  10 228.620 3.74792  -1
  13   3   6 228.620 3.74792   2
 -11   3  10 527.435 6.63261  -1
  11   3   6 527.435 6.63261   2
  -9   3  10 932.083 8.32972  -1
   9   3   7 932.083 8.32972   2
  -7   3  10 246.324 3.46784  -1
   7   3   8 246.324 3.46784   2
  -5   3  10 98.1326 2.10842  -1
   5   3   8 98.1326 2.10842   2
  -3   3  10 379.290 3.90725  -1
   3   3   9 379.290 3.90725   2
  -1   3  10 351.624 4.70917  -1
   1   3  10 351.624 4.70917   2
   1   3  10 338.158 4.14347  -1
  -1   3  10 338.158 4.14347   2
   3   3  10 284.917 2.75157  -1
  -3   3  11 284.917 2.75157   2
   5   3  10 309.149 4.11562  -1
  -5   3  12 309.149 4.11562   2
   7   3  10 182.369 2.70685  -1
  -7   3  12 182.369 2.70685   2
   9   3  10 268.825 3.05937  -1
  -9   3  13 268.825 3.05937   2
  11   3  10 249.627 4.65868  -1
 -11   3  14 249.627 4.65868   2
  13   3  10 221.034 4.24333  -1
 -13   3  14 221.034 4.24333   2
  15   3  10 290.077 4.10449  -1
 -15   3  15 290.077 4.10449   2
  17   3  10 208.343 5.93169  -1
 -17   3  16 208.343 5.93169   2
  19   3  10 249.368 8.62068  -1
 -19   3  16 249.368 8.62068   2
  21   3  10 132.144 4.20901  -1
 -21   3  17 132.144 4.20901   2
  23   3  10 60.7056 7.11554  -1
 -23   3  18 60.7056 7.11554   2
  25   3  10 27.8885 11.8667  -1
 -25   3  18 27.8885 11.8667   2
  27   3  10 28.2548 4.72611  -1
 -27   3  19 28.2548 4.72611   2
  29   3  10 1.85586 12.1887  -1
 -29   3  20 1.85586 12.1887   2
  31   3  10 4.42396 13.7542  -1
 -31   3  20 4.42396 13.7542   2
 -32   4  10 23.3525 9.70232  -1
 -32   4   1 23.3525 9.70232   2
 -30   4  10 41.8742 6.41440  -1
  30   4   0 41.8742 6.41440   2
 -28   4  10 26.6568 6.90366  -1
  28   4   1 26.6568 6.90366   2
 -26   4  10 103.518 5.70539  -1
  26   4   1 103.518 5.70539   2
 -24   4  10 16.0610 2.63822  -1
  24   4   2 16.0610 2.63822   2
 -22   4  10 38.2234 3.90767  -1
  22   4   3 38.2234 3.90767   2
 -20   4  10 51.1323 3.57747  -1
  20   4   3 51.1323 3.57747   2
 -18   4  10 17.0530 1.66821  -1
  18   4   4 17.0530 1.66821   2
 -16   4  10 37.7346 2.54783  -1
  16   4   5 37.7346 2.54783   2
 -14   4  10 89.0942 2.46035  -1
  14   4   5 89.0942 2.46035   2
 -12   4  10 19.9947 1.02230  -1
  12   4   6 19.9947 1.02230   2
 -10   4  10 108.621 2.31939  -1
  10   4   7 108.621 2.31939   2
  -8   4  10 187.136 2.90075  -1
   8   4   7 187.136 2.90075   2
  -6   4  10 85.0555 1.41047  -1
   6   4   8 85.0555 1.41047   2
  -4   4  10 520.163 7.22556  -1
   4   4   9 520.163 7.22556   2
  -2   4  10 701.433 8.20926  -1
   2   4   9 701.433 8.20926   2
   0   4  10 1199.45 10.9381  -1
   0   4  10 1199.45 10.9381   2
   2   4  10 803.443 9.27835  -1
  -2   4  11 803.443 9.27835   2
   4   4  10 561.594 6.50828  -1
  -4   4  11 561.594 6.50828   2
   6   4  10 398.986 3.90263  -1
  -6   4  12 398.986 3.90263   2
   8   4  10 314.584 4.44844  -1
  -8   4  13 314.584 4.44844   2
  10   4  10 247.498 4.00813  -1
 -10   4  13 247.498 4.00813   2
  12   4  10 8.15708 1.22340  -1
 -12   4  14 8.15708 1.22340   2
  14   4  10 109.464 4.10010  -1
 -14   4  15 109.464 4.10010   2
  16   4  10 31.5842 3.66022  -1
 -16   4  15 31.5842 3.66022   2
  18   4  10 70.2079 3.04690  -1
 -18   4  16 70.2079 3.04690   2
  20   4  10 41.0384 5.49263  -1
 -20   4  17 41.0384 5.49263   2
  22   4  10 37.2192 7.52334  -1
 -22   4  17 37.2192 7.52334   2
  24   4  10 24.4672 3.42890  -1
 -24   4  18 24.4672 3.42890   2
  26   4  10 0.44460 11.5086  -1
 -26   4  19 0.44460 11.5086   2
  28   4  10 23.9161 13.4257  -1
 -28   4  19 23.9161 13.4257   2
  30   4  10 5.99037 5.63829  -1
 -30   4  20 5.99037 5.63829   2
  32   4  10 20.7317 14.3108  -1
 -32   4  21 20.7317 14.3108   2
 -33   5  10 38.7538 12.7597  -1
 -33   5   1 38.7538 12.7597   2
 -31   5  10 17.1083 10.4448  -1
  31   5   0 17.1083 10.4448   2
 -29   5  10 23.8066 7.38182  -1
  29   5   0 23.8066 7.38182   2
 -27   5  10 52.4501 3.55271  -1
  27   5   1 52.4501 3.55271   2
 -25   5  10 27.6667 4.52125  -1
  25   5   2 27.6667 4.52125   2
 -23   5  10 57.1826 4.49854  -1
  23   5   2 57.1826 4.49854   2
 -21   5  10 16.4983 2.68040  -1
  21   5   3 16.4983 2.68040   2
 -19   5  10 31.3358 2.71053  -1
  19   5   4 31.3358 2.71053   2
 -17   5  10 46.3511 2.82227  -1
  17   5   4 46.3511 2.82227   2
 -15   5  10 51.8384 1.62300  -1
  15   5   5 51.8384 1.62300   2
 -13   5  10 58.9901 2.50959  -1
  13   5   6 58.9901 2.50959   2
 -11   5  10 104.504 2.36668  -1
  11   5   6 104.504 2.36668   2
  -9   5  10 100.050 1.58876  -1
   9   5   7 100.050 1.58876   2
  -7   5  10 124.496 2.36852  -1
   7   5   8 124.496 2.36852   2
  -5   5  10 233.057 3.95352  -1
   5   5   8 233.057 3.95352   2
  -3   5  10 643.478 5.86149  -1
   3   5   9 643.478 5.86149   2
  -1   5  10 310.842 4.33187  -1
   1   5  10 310.842 4.33187   2
   1   5  10 314.607 4.29567  -1
  -1   5  10 314.607 4.29567   2
   3   5  10 658.669 5.88889  -1
  -3   5  11 658.669 5.88889   2
   5   5  10 117.865 2.78644  -1
  -5   5  12 117.865 2.78644   2
   7   5  10 172.149 2.95110  -1
  -7   5  12 172.149 2.95110   2
   9   5  10 318.196 4.42342  -1
  -9   5  13 318.196 4.42342   2
  11   5  10 86.1147 4.13914  -1
 -11   5  14 86.1147 4.13914   2
  13   5  10 62.7268 4.13099  -1
 -13   5  14 62.7268 4.13099   2
  15   5  10 1.37852 1.95253  -1
 -15   5  15 1.37852 1.95253   2
  17   5  10 17.0810 3.89597  -1
 -17   5  16 17.0810 3.89597   2
  19   5  10 0.50208 4.41597  -1
 -19   5  16 0.50208 4.41597   2
  21   5  10 9.46206 2.76527  -1
 -21   5  17 9.46206 2.76527   2
  23   5  10 7.46492 7.54491  -1
 -23   5  18 7.46492 7.54491   2
  25   5  10 8.16387 7.79679  -1
 -25   5  18 8.16387 7.79679   2
  27   5  10 5.90808 5.39816  -1
 -27   5  19 5.90808 5.39816   2
  29   5  10 3.85939 13.3936  -1
 -29   5  20 3.85939 13.3936   2
  31   5  10 8.28525 14.1207  -1
 -31   5  20 8.28525 14.1207   2
 -30   6  10 0.06789 5.77000  -1
  30   6   0 0.06789 5.77000   2
 -28   6  10 24.6806 9.56858  -1
  28   6   1 24.6806 9.56858   2
 -26   6  10 24.5278 4.97708  -1
  26   6   1 24.5278 4.97708   2
 -24   6  10 56.2875 3.05650  -1
  24   6   2 56.2875 3.05650   2
 -22   6  10 36.4840 4.08889  -1
  22   6   3 36.4840 4.08889   2
 -20   6  10 56.6780 3.31422  -1
  20   6   3 56.6780 3.31422   2
 -18   6  10 189.274 3.65050  -1
  18   6   4 189.274 3.65050   2
 -16   6  10 80.4181 3.30081  -1
  16   6   5 80.4181 3.30081   2
 -14   6  10 124.949 3.38672  -1
  14   6   5 124.949 3.38672   2
 -12   6  10 627.997 6.70892  -1
  12   6   6 627.997 6.70892   2
 -10   6  10 11.9916 2.08041  -1
  10   6   7 11.9916 2.08041   2
  -8   6  10 15.8559 1.89998  -1
   8   6   7 15.8559 1.89998   2
  -6   6  10 273.658 3.03365  -1
   6   6   8 273.658 3.03365   2
  -4   6  10 262.339 4.23183  -1
   4   6   9 262.339 4.23183   2
  -2   6  10 204.379 4.20457  -1
   2   6   9 204.379 4.20457   2
   0   6  10 66.9790 1.38267  -1
   0   6  10 66.9790 1.38267   2
   2   6  10 240.076 4.09076  -1
  -2   6  11 240.076 4.09076   2
   4   6  10 477.221 6.00043  -1
  -4   6  11 477.221 6.00043   2
   6   6  10 81.7984 1.71073  -1
  -6   6  12 81.7984 1.71073   2
   8   6  10 100.131 2.71542  -1
  -8   6  13 100.131 2.71542   2
  10   6  10 428.793 7.79168  -1
 -10   6  13 428.793 7.79168   2
  12   6  10 220.619 3.98951  -1
 -12   6  14 220.619 3.98951   2
  14   6  10 145.439 6.06553  -1
 -14   6  15 145.439 6.06553   2
  16   6  10 121.564 5.23923  -1
 -16   6  15 121.564 5.23923   2
  18   6  10 175.233 4.34184  -1
 -18   6  16 175.233 4.34184   2
  20   6  10 60.7892 6.70421  -1
 -20   6  17 60.7892 6.70421   2
  22   6  10 8.64035 7.04737  -1
 -22   6  17 8.64035 7.04737   2
  24   6  10 14.1242 3.71189  -1
 -24   6  18 14.1242 3.71189   2
  26   6  10 3.65937 12.8559  -1
 -26   6  19 3.65937 12.8559   2
  28   6  10 4.82120 14.4079  -1
 -28   6  19 4.82120 14.4079   2
  30   6  10 2.32444 11.2077  -1
 -30   6  20 2.32444 11.2077   2
 -33   7  10 -1.6781 11.7756  -1
 -33   7   1 -1.6781 11.7756   2
 -29   7  10 -5.3850 9.64383  -1
  29   7   0 -5.3850 9.64383   2
 -27   7  10 4.91059 4.94704  -1
  27   7   1 4.91059 4.94704   2
 -25   7  10 44.0625 6.10444  -1
  25   7   2 44.0625 6.10444   2
 -23   7  10 96.7160 4.62702  -1
  23   7   2 96.7160 4.62702   2
 -21   7  10 105.860 3.39323  -1
  21   7   3 105.860 3.39323   2
 -19   7  10 426.464 7.91130  -1
  19   7   4 426.464 7.91130   2
 -17   7  10 500.415 8.07601  -1
  17   7   4 500.415 8.07601   2
 -15   7  10 279.680 4.32054  -1
  15   7   5 279.680 4.32054   2
 -13   7  10 596.249 8.23028  -1
  13   7   6 596.249 8.23028   2
 -11   7  10 397.976 6.12117  -1
  11   7   6 397.976 6.12117   2
  -9   7  10 1.51018 1.44184  -1
   9   7   7 1.51018 1.44184   2
  -7   7  10 249.771 4.03424  -1
   7   7   8 249.771 4.03424   2
  -5   7  10 335.999 4.64065  -1
   5   7   8 335.999 4.64065   2
  -3   7  10 7.15809 1.03247  -1
   3   7   9 7.15809 1.03247   2
  -1   7  10 12.4736 2.09062  -1
   1   7  10 12.4736 2.09062   2
   1   7  10 9.93483 2.19717  -1
  -1   7  10 9.93483 2.19717   2
   3   7  10 33.0784 1.24778  -1
  -3   7  11 33.0784 1.24778   2
   5   7  10 98.9348 3.00587  -1
  -5   7  12 98.9348 3.00587   2
   7   7  10 201.417 3.96013  -1
  -7   7  12 201.417 3.96013   2
   9   7  10 249.048 3.95734  -1
  -9   7  13 249.048 3.95734   2
  11   7  10 273.496 5.74803  -1
 -11   7  14 273.496 5.74803   2
  13   7  10 457.572 11.3335  -1
 -13   7  14 457.572 11.3335   2
  15   7  10 322.906 5.91827  -1
 -15   7  15 322.906 5.91827   2
  17   7  10 360.970 8.12969  -1
 -17   7  16 360.970 8.12969   2
  19   7  10 241.152 8.38596  -1
 -19   7  16 241.152 8.38596   2
  21   7  10 43.8890 3.17930  -1
 -21   7  17 43.8890 3.17930   2
  23   7  10 60.2565 8.57034  -1
 -23   7  18 60.2565 8.57034   2
  25   7  10 10.2456 13.3884  -1
 -25   7  18 10.2456 13.3884   2
  27   7  10 2.89833 6.22578  -1
 -27   7  19 2.89833 6.22578   2
  29   7  10 -4.4542 13.5060  -1
 -29   7  20 -4.4542 13.5060   2
 -30   8  10 0.51481 8.45378  -1
  30   8   0 0.51481 8.45378   2
 -28   8  10 35.2548 10.6277  -1
  28   8   1 35.2548 10.6277   2
 -26   8  10 18.9658 9.14650  -1
  26   8   1 18.9658 9.14650   2
 -24   8  10 32.7816 4.46494  -1
  24   8   2 32.7816 4.46494   2
 -22   8  10 59.7053 4.74820  -1
  22   8   3 59.7053 4.74820   2
 -20   8  10 112.799 4.34008  -1
  20   8   3 112.799 4.34008   2
 -18   8  10 327.850 6.07543  -1
  18   8   4 327.850 6.07543   2
 -16   8  10 263.467 5.70504  -1
  16   8   5 263.467 5.70504   2
 -14   8  10 175.280 4.32218  -1
  14   8   5 175.280 4.32218   2
 -12   8  10 342.977 5.42830  -1
  12   8   6 342.977 5.42830   2
 -10   8  10 208.573 4.51676  -1
  10   8   7 208.573 4.51676   2
  -8   8  10 74.5550 3.15098  -1
   8   8   7 74.5550 3.15098   2
  -6   8  10 138.117 2.36730  -1
   6   8   8 138.117 2.36730   2
  -4   8  10 50.9146 2.71358  -1
   4   8   9 50.9146 2.71358   2
  -2   8  10 68.0054 2.92421  -1
   2   8   9 68.0054 2.92421   2
   0   8  10 8.46977 1.20856  -1
   0   8  10 8.46977 1.20856   2
   2   8  10 202.777 4.39872  -1
  -2   8  11 202.777 4.39872   2
   4   8  10 72.7225 2.96604  -1
  -4   8  11 72.7225 2.96604   2
   6   8  10 40.9313 1.55520  -1
  -6   8  12 40.9313 1.55520   2
   8   8  10 241.608 4.72082  -1
  -8   8  13 241.608 4.72082   2
  10   8  10 362.660 7.42819  -1
 -10   8  13 362.660 7.42819   2
  12   8  10 307.186 5.75240  -1
 -12   8  14 307.186 5.75240   2
  14   8  10 257.802 7.37965  -1
 -14   8  15 257.802 7.37965   2
  16   8  10 253.711 8.39677  -1
 -16   8  15 253.711 8.39677   2
  18   8  10 161.468 4.42134  -1
 -18   8  16 161.468 4.42134   2
  20   8  10 78.8017 6.97253  -1
 -20   8  17 78.8017 6.97253   2
  22   8  10 44.9011 9.51235  -1
 -22   8  17 44.9011 9.51235   2
  24   8  10 27.4309 6.13115  -1
 -24   8  18 27.4309 6.13115   2
  26   8  10 -17.008 13.3571  -1
 -26   8  19 -17.008 13.3571   2
  28   8  10 14.4157 15.3344  -1
 -28   8  19 14.4157 15.3344   2
 -27   9  10 49.4668 7.21968  -1
  27   9   1 49.4668 7.21968   2
 -25   9  10 23.2602 15.7008  -1
  25   9   2 23.2602 15.7008   2
 -23   9  10 18.0830 7.42923  -1
  23   9   2 18.0830 7.42923   2
 -21   9  10 38.6537 3.61460  -1
  21   9   3 38.6537 3.61460   2
 -19   9  10 57.0931 4.95308  -1
  19   9   4 57.0931 4.95308   2
 -17   9  10 66.9975 4.52489  -1
  17   9   4 66.9975 4.52489   2
 -15   9  10 17.5339 2.41166  -1
  15   9   5 17.5339 2.41166   2
 -13   9  10 36.7740 3.81432  -1
  13   9   6 36.7740 3.81432   2
 -11   9  10 74.7743 3.66136  -1
  11   9   6 74.7743 3.66136   2
  -9   9  10 0.83492 1.84301  -1
   9   9   7 0.83492 1.84301   2
  -7   9  10 126.921 3.86318  -1
   7   9   8 126.921 3.86318   2
  -5   9  10 94.2623 3.36639  -1
   5   9   8 94.2623 3.36639   2
  -3   9  10 195.556 3.02787  -1
   3   9   9 195.556 3.02787   2
  -1   9  10 158.137 3.98746  -1
   1   9  10 158.137 3.98746   2
   1   9  10 158.811 3.75595  -1
  -1   9  10 158.811 3.75595   2
   3   9  10 346.415 4.70457  -1
  -3   9  11 346.415 4.70457   2
   5   9  10 29.4514 3.48100  -1
  -5   9  12 29.4514 3.48100   2
   7   9  10 82.8445 3.15820  -1
  -7   9  12 82.8445 3.15820   2
   9   9  10 175.026 3.74311  -1
  -9   9  13 175.026 3.74311   2
  11   9  10 44.0393 4.07299  -1
 -11   9  14 44.0393 4.07299   2
  13   9  10 61.7151 5.59973  -1
 -13   9  14 61.7151 5.59973   2
  15   9  10 43.8483 3.42690  -1
 -15   9  15 43.8483 3.42690   2
  17   9  10 8.02382 5.33949  -1
 -17   9  16 8.02382 5.33949   2
  19   9  10 22.8643 5.87168  -1
 -19   9  16 22.8643 5.87168   2
  21   9  10 5.04405 4.36967  -1
 -21   9  17 5.04405 4.36967   2
  23   9  10 13.2397 13.4294  -1
 -23   9  18 13.2397 13.4294   2
  25   9  10 21.0807 14.6195  -1
 -25   9  18 21.0807 14.6195   2
  27   9  10 10.8114 11.9545  -1
 -27   9  19 10.8114 11.9545   2
 -26  10  10 24.0705 13.8944  -1
  26  10   1 24.0705 13.8944   2
 -24  10  10 20.5564 6.70729  -1
  24  10   2 20.5564 6.70729   2
 -22  10  10 28.2919 10.6091  -1
  22  10   3 28.2919 10.6091   2
 -20  10  10 20.3889 6.62605  -1
  20  10   3 20.3889 6.62605   2
 -18  10  10 2.14256 2.99464  -1
  18  10   4 2.14256 2.99464   2
 -16  10  10 18.7842 6.06594  -1
  16  10   5 18.7842 6.06594   2
 -14  10  10 29.8448 4.70738  -1
  14  10   5 29.8448 4.70738   2
 -12  10  10 32.5755 2.69912  -1
  12  10   6 32.5755 2.69912   2
 -10  10  10 75.7311 4.14513  -1
  10  10   7 75.7311 4.14513   2
  -8  10  10 111.613 4.49312  -1
   8  10   7 111.613 4.49312   2
  -6  10  10 83.5088 2.51550  -1
   6  10   8 83.5088 2.51550   2
  -4  10  10 207.657 5.20861  -1
   4  10   9 207.657 5.20861   2
  -2  10  10 210.762 4.73447  -1
   2  10   9 210.762 4.73447   2
   0  10  10 282.812 4.13604  -1
   0  10  10 282.812 4.13604   2
   2  10  10 328.716 6.78939  -1
  -2  10  11 328.716 6.78939   2
   4  10  10 356.143 6.68292  -1
  -4  10  11 356.143 6.68292   2
   6  10  10 203.246 3.94548  -1
  -6  10  12 203.246 3.94548   2
   8  10  10 177.701 6.57953  -1
  -8  10  13 177.701 6.57953   2
  10  10  10 164.682 5.26741  -1
 -10  10  13 164.682 5.26741   2
  12  10  10 49.8834 3.11045  -1
 -12  10  14 49.8834 3.11045   2
  14  10  10 12.3517 5.31746  -1
 -14  10  15 12.3517 5.31746   2
  16  10  10 33.3631 5.61878  -1
 -16  10  15 33.3631 5.61878   2
  18  10  10 24.8501 3.89275  -1
 -18  10  16 24.8501 3.89275   2
  20  10  10 -0.6455 8.91667  -1
 -20  10  17 -0.6455 8.91667   2
  22  10  10 18.4140 9.93858  -1
 -22  10  17 18.4140 9.93858   2
  24  10  10 9.85942 11.0267  -1
 -24  10  18 9.85942 11.0267   2
 -27  11  10 4.26403 12.0412  -1
  27  11   1 4.26403 12.0412   2
 -23  11  10 16.9485 10.6671  -1
  23  11   2 16.9485 10.6671   2
 -21  11  10 13.9628 5.97257  -1
  21  11   3 13.9628 5.97257   2
 -19  11  10 31.8643 8.22574  -1
  19  11   4 31.8643 8.22574   2
 -17  11  10 50.9397 6.55315  -1
  17  11   4 50.9397 6.55315   2
 -15  11  10 77.5153 3.69633  -1
  15  11   5 77.5153 3.69633   2
 -13  11  10 94.9225 6.83184  -1
  13  11   6 94.9225 6.83184   2
 -11  11  10 105.772 5.83285  -1
  11  11   6 105.772 5.83285   2
  -9  11  10 160.620 4.36789  -1
   9  11   7 160.620 4.36789   2
  -7  11  10 55.5450 5.38082  -1
   7  11   8 55.5450 5.38082   2
  -5  11  10 29.5855 3.94883  -1
   5  11   8 29.5855 3.94883   2
  -3  11  10 100.223 2.87949  -1
   3  11   9 100.223 2.87949   2
  -1  11  10 47.8464 4.25295  -1
   1  11  10 47.8464 4.25295   2
   1  11  10 52.6353 3.93362  -1
  -1  11  10 52.6353 3.93362   2
   3  11  10 94.6423 2.87332  -1
  -3  11  11 94.6423 2.87332   2
   5  11  10 93.9765 4.29476  -1
  -5  11  12 93.9765 4.29476   2
   7  11  10 93.1313 6.33332  -1
  -7  11  12 93.1313 6.33332   2
   9  11  10 86.9740 3.54302  -1
  -9  11  13 86.9740 3.54302   2
  11  11  10 88.0994 6.11087  -1
 -11  11  14 88.0994 6.11087   2
  13  11  10 36.7133 6.49360  -1
 -13  11  14 36.7133 6.49360   2
  15  11  10 54.6899 4.20377  -1
 -15  11  15 54.6899 4.20377   2
  17  11  10 87.1470 8.24601  -1
 -17  11  16 87.1470 8.24601   2
  19  11  10 45.5252 10.5466  -1
 -19  11  16 45.5252 10.5466   2
  21  11  10 14.7776 7.80801  -1
 -21  11  17 14.7776 7.80801   2
  23  11  10 5.82798 14.3121  -1
 -23  11  18 5.82798 14.3121   2
 -20  12  10 41.9025 14.6505  -1
  20  12   3 41.9025 14.6505   2
 -18  12  10 57.8336 5.15083  -1
  18  12   4 57.8336 5.15083   2
 -16  12  10 113.163 9.97313  -1
  16  12   5 113.163 9.97313   2
 -14  12  10 121.010 8.27689  -1
  14  12   5 121.010 8.27689   2
 -12  12  10 66.8146 3.92359  -1
  12  12   6 66.8146 3.92359   2
 -10  12  10 139.608 7.08111  -1
  10  12   7 139.608 7.08111   2
  -8  12  10 130.717 8.44748  -1
   8  12   7 130.717 8.44748   2
  -6  12  10 33.6547 2.54723  -1
   6  12   8 33.6547 2.54723   2
  -4  12  10 9.82719 4.59979  -1
   4  12   9 9.82719 4.59979   2
  -2  12  10 31.3942 4.07901  -1
   2  12   9 31.3942 4.07901   2
   0  12  10 7.28129 2.17659  -1
   0  12  10 7.28129 2.17659   2
   2  12  10 -2.4488 4.11941  -1
  -2  12  11 -2.4488 4.11941   2
   4  12  10 -0.5237 3.85523  -1
  -4  12  11 -0.5237 3.85523   2
   6  12  10 5.22864 2.60185  -1
  -6  12  12 5.22864 2.60185   2
   8  12  10 3.78437 5.84208  -1
  -8  12  13 3.78437 5.84208   2
  10  12  10 15.1837 7.20517  -1
 -10  12  13 15.1837 7.20517   2
  12  12  10 27.1737 3.45820  -1
 -12  12  14 27.1737 3.45820   2
  14  12  10 67.1578 8.28265  -1
 -14  12  15 67.1578 8.28265   2
  16  12  10 69.4131 8.56910  -1
 -16  12  15 69.4131 8.56910   2
  18  12  10 12.3400 6.47949  -1
 -18  12  16 12.3400 6.47949   2
  20  12  10 24.2669 16.5477  -1
 -20  12  17 24.2669 16.5477   2
 -17  13  10 22.8472 14.0932  -1
  17  13   4 22.8472 14.0932   2
 -15  13  10 90.8592 7.40530  -1
  15  13   5 90.8592 7.40530   2
 -13  13  10 5.87080 17.4770  -1
  13  13   6 5.87080 17.4770   2
 -11  13  10 7.31995 9.15146  -1
  11  13   6 7.31995 9.15146   2
  -9  13  10 78.8033 4.40917  -1
   9  13   7 78.8033 4.40917   2
  -7  13  10 40.6264 6.86917  -1
   7  13   8 40.6264 6.86917   2
  -5  13  10 65.8558 6.77468  -1
   5  13   8 65.8558 6.77468   2
  -3  13  10 50.3083 3.25937  -1
   3  13   9 50.3083 3.25937   2
  -1  13  10 100.234 5.67599  -1
   1  13  10 100.234 5.67599   2
   1  13  10 108.525 5.14897  -1
  -1  13  10 108.525 5.14897   2
   3  13  10 47.7024 2.95841  -1
  -3  13  11 47.7024 2.95841   2
   5  13  10 62.1516 5.50327  -1
  -5  13  12 62.1516 5.50327   2
   7  13  10 61.6952 8.19006  -1
  -7  13  12 61.6952 8.19006   2
   9  13  10 7.93701 3.36064  -1
  -9  13  13 7.93701 3.36064   2
  11  13  10 3.99432 6.58799  -1
 -11  13  14 3.99432 6.58799   2
  13  13  10 20.4451 10.5023  -1
 -13  13  14 20.4451 10.5023   2
  15  13  10 23.9510 6.52569  -1
 -15  13  15 23.9510 6.52569   2
  17  13  10 -5.1619 15.5081  -1
 -17  13  16 -5.1619 15.5081   2
 -14  14  10 -12.550 14.1708  -1
  14  14   5 -12.550 14.1708   2
 -12  14  10 -0.1480 5.91417  -1
  12  14   6 -0.1480 5.91417   2
 -10  14  10 8.43337 8.59314  -1
  10  14   7 8.43337 8.59314   2
  -8  14  10 21.4709 10.8871  -1
   8  14   7 21.4709 10.8871   2
  -6  14  10 69.6646 4.64045  -1
   6  14   8 69.6646 4.64045   2
  -4  14  10 69.3815 6.53414  -1
   4  14   9 69.3815 6.53414   2
  -2  14  10 102.895 7.36824  -1
   2  14   9 102.895 7.36824   2
   0  14  10 182.882 4.80362  -1
   0  14  10 182.882 4.80362   2
   2  14  10 66.1628 5.86331  -1
  -2  14  11 66.1628 5.86331   2
   4  14  10 52.5904 6.15868  -1
  -4  14  11 52.5904 6.15868   2
   6  14  10 99.6555 4.73820  -1
  -6  14  12 99.6555 4.73820   2
   8  14  10 13.5343 10.9743  -1
  -8  14  13 13.5343 10.9743   2
  10  14  10 9.08102 14.4502  -1
 -10  14  13 9.08102 14.4502   2
  12  14  10 5.68666 11.0504  -1
 -12  14  14 5.68666 11.0504   2
 -11  15  10 20.7678 15.9286  -1
  11  15   6 20.7678 15.9286   2
  -9  15  10 15.9893 7.62978  -1
   9  15   7 15.9893 7.62978   2
  -7  15  10 65.8983 11.6809  -1
   7  15   8 65.8983 11.6809   2
  -5  15  10 63.8180 10.5159  -1
   5  15   8 63.8180 10.5159   2
  -3  15  10 59.8797 5.55421  -1
   3  15   9 59.8797 5.55421   2
  -1  15  10 205.570 12.3635  -1
   1  15  10 205.570 12.3635   2
   1  15  10 202.437 10.0402  -1
  -1  15  10 202.437 10.0402   2
   3  15  10 35.1747 5.87577  -1
  -3  15  11 35.1747 5.87577   2
   5  15  10 85.2429 16.1914  -1
  -5  15  12 85.2429 16.1914   2
   7  15  10 56.8279 14.6958  -1
  -7  15  12 56.8279 14.6958   2
   9  15  10 -2.5438 8.53457  -1
  -9  15  13 -2.5438 8.53457   2
  -2  16  10 33.2528 14.9109  -1
   2  16   9 33.2528 14.9109   2
 -32   0  11 50.5177 13.4822  -1
  32   0   0 50.5177 13.4822   2
 -30   0  11 3.53357 9.44052  -1
  30   0   1 3.53357 9.44052   2
 -28   0  11 50.4950 6.27387  -1
  28   0   2 50.4950 6.27387   2
 -26   0  11 121.699 7.41791  -1
  26   0   2 121.699 7.41791   2
 -24   0  11 2.18824 3.55930  -1
  24   0   3 2.18824 3.55930   2
 -22   0  11 10.8445 4.52800  -1
  22   0   4 10.8445 4.52800   2
 -20   0  11 10.9584 3.05655  -1
  20   0   4 10.9584 3.05655   2
 -18   0  11 0.24669 1.71298  -1
  18   0   5 0.24669 1.71298   2
 -16   0  11 0.70352 3.00966  -1
  16   0   6 0.70352 3.00966   2
 -14   0  11 8.96609 2.97733  -1
  14   0   6 8.96609 2.97733   2
 -12   0  11 -1.7375 1.28915  -1
  12   0   7 -1.7375 1.28915   2
 -10   0  11 470.848 9.90704  -1
  10   0   8 470.848 9.90704   2
  -8   0  11 57.1611 2.76531  -1
   8   0   8 57.1611 2.76531   2
  -6   0  11 -1.8073 1.03431  -1
   6   0   9 -1.8073 1.03431   2
  -4   0  11 1450.37 23.8252  -1
   4   0  10 1450.37 23.8252   2
  -2   0  11 1375.56 20.7919  -1
   2   0  10 1375.56 20.7919   2
   0   0  11 1.60933 1.01583  -1
   0   0  11 1.60933 1.01583   2
   2   0  11 431.566 9.08990  -1
  -2   0  12 431.566 9.08990   2
   4   0  11 581.075 9.72944  -1
  -4   0  12 581.075 9.72944   2
   6   0  11 0.57333 1.18707  -1
  -6   0  13 0.57333 1.18707   2
   8   0  11 121.449 4.95239  -1
  -8   0  14 121.449 4.95239   2
  10   0  11 81.3540 3.82292  -1
 -10   0  14 81.3540 3.82292   2
  12   0  11 1.17749 1.91736  -1
 -12   0  15 1.17749 1.91736   2
  14   0  11 7.14842 3.96105  -1
 -14   0  16 7.14842 3.96105   2
  16   0  11 5.56126 3.87599  -1
 -16   0  16 5.56126 3.87599   2
  18   0  11 -1.5680 2.46583  -1
 -18   0  17 -1.5680 2.46583   2
  20   0  11 41.7354 4.66657  -1
 -20   0  18 41.7354 4.66657   2
  22   0  11 13.4119 6.59773  -1
 -22   0  18 13.4119 6.59773   2
  24   0  11 -1.5193 3.51920  -1
 -24   0  19 -1.5193 3.51920   2
 -35   1  11 25.0953 14.6938  -1
 -35   1   1 25.0953 14.6938   2
 -33   1  11 25.5347 11.4388  -1
  33   1   0 25.5347 11.4388   2
 -31   1  11 6.88936 12.3434  -1
  31   1   1 6.88936 12.3434   2
 -29   1  11 20.0121 5.49045  -1
  29   1   1 20.0121 5.49045   2
 -27   1  11 67.9729 3.59779  -1
  27   1   2 67.9729 3.59779   2
 -25   1  11 76.6142 5.23087  -1
  25   1   3 76.6142 5.23087   2
 -23   1  11 120.432 3.95629  -1
  23   1   3 120.432 3.95629   2
 -21   1  11 122.983 2.85248  -1
  21   1   4 122.983 2.85248   2
 -19   1  11 312.182 6.89346  -1
  19   1   5 312.182 6.89346   2
 -17   1  11 538.079 7.96806  -1
  17   1   5 538.079 7.96806   2
 -15   1  11 232.425 2.73156  -1
  15   1   6 232.425 2.73156   2
 -13   1  11 304.887 4.93262  -1
  13   1   7 304.887 4.93262   2
 -11   1  11 342.147 5.23475  -1
  11   1   7 342.147 5.23475   2
  -9   1  11 86.1592 1.39102  -1
   9   1   8 86.1592 1.39102   2
  -7   1  11 256.114 3.73312  -1
   7   1   9 256.114 3.73312   2
  -5   1  11 40.6016 1.87339  -1
   5   1   9 40.6016 1.87339   2
  -3   1  11 443.167 4.46777  -1
   3   1  10 443.167 4.46777   2
  -1   1  11 167.250 2.68880  -1
   1   1  11 167.250 2.68880   2
   1   1  11 152.614 2.75851  -1
  -1   1  11 152.614 2.75851   2
   3   1  11 574.120 5.65553  -1
  -3   1  12 574.120 5.65553   2
   5   1  11 262.080 3.91520  -1
  -5   1  13 262.080 3.91520   2
   7   1  11 521.714 7.24370  -1
  -7   1  13 521.714 7.24370   2
   9   1  11 293.340 3.65905  -1
  -9   1  14 293.340 3.65905   2
  11   1  11 275.852 4.54768  -1
 -11   1  15 275.852 4.54768   2
  13   1  11 408.932 6.56391  -1
 -13   1  15 408.932 6.56391   2
  15   1  11 200.715 3.40437  -1
 -15   1  16 200.715 3.40437   2
  17   1  11 159.825 4.75161  -1
 -17   1  17 159.825 4.75161   2
  19   1  11 94.1662 4.05976  -1
 -19   1  17 94.1662 4.05976   2
  21   1  11 49.9847 2.83665  -1
 -21   1  18 49.9847 2.83665   2
  23   1  11 52.9365 7.64956  -1
 -23   1  19 52.9365 7.64956   2
  25   1  11 21.4313 11.1351  -1
 -25   1  19 21.4313 11.1351   2
  27   1  11 27.4950 9.35877  -1
 -27   1  20 27.4950 9.35877   2
 -36   2  11 9.84523 12.3973  -1
 -36   2   1 9.84523 12.3973   2
 -34   2  11 5.08003 13.3075  -1
  34   2   0 5.08003 13.3075   2
 -32   2  11 8.56246 8.82076  -1
  32   2   0 8.56246 8.82076   2
 -30   2  11 16.7722 4.16971  -1
  30   2   1 16.7722 4.16971   2
 -28   2  11 32.2131 5.81587  -1
  28   2   2 32.2131 5.81587   2
 -26   2  11 72.2580 4.75895  -1
  26   2   2 72.2580 4.75895   2
 -24   2  11 225.581 4.75925  -1
  24   2   3 225.581 4.75925   2
 -22   2  11 286.228 6.35903  -1
  22   2   4 286.228 6.35903   2
 -20   2  11 382.286 5.70275  -1
  20   2   4 382.286 5.70275   2
 -18   2  11 434.689 4.92210  -1
  18   2   5 434.689 4.92210   2
 -16   2  11 325.499 5.28266  -1
  16   2   6 325.499 5.28266   2
 -14   2  11 285.937 4.77547  -1
  14   2   6 285.937 4.77547   2
 -12   2  11 463.088 4.39086  -1
  12   2   7 463.088 4.39086   2
 -10   2  11 60.4949 2.08496  -1
  10   2   8 60.4949 2.08496   2
  -8   2  11 33.1241 1.66739  -1
   8   2   8 33.1241 1.66739   2
  -6   2  11 53.8382 1.07031  -1
   6   2   9 53.8382 1.07031   2
  -4   2  11 10.0418 1.18732  -1
   4   2  10 10.0418 1.18732   2
  -2   2  11 39.3193 1.68194  -1
   2   2  10 39.3193 1.68194   2
   0   2  11 306.515 3.20862  -1
   0   2  11 306.515 3.20862   2
   2   2  11 363.161 5.28661  -1
  -2   2  12 363.161 5.28661   2
   4   2  11 361.791 5.26231  -1
  -4   2  12 361.791 5.26231   2
   6   2  11 592.437 5.48828  -1
  -6   2  13 592.437 5.48828   2
   8   2  11 634.558 9.06028  -1
  -8   2  14 634.558 9.06028   2
  10   2  11 692.710 9.39894  -1
 -10   2  14 692.710 9.39894   2
  12   2  11 532.395 6.53188  -1
 -12   2  15 532.395 6.53188   2
  14   2  11 258.803 5.04811  -1
 -14   2  16 258.803 5.04811   2
  16   2  11 235.278 5.43838  -1
 -16   2  16 235.278 5.43838   2
  18   2  11 193.313 3.82011  -1
 -18   2  17 193.313 3.82011   2
  20   2  11 75.2553 5.30237  -1
 -20   2  18 75.2553 5.30237   2
  22   2  11 25.1590 7.44396  -1
 -22   2  18 25.1590 7.44396   2
  24   2  11 -1.9044 3.45492  -1
 -24   2  19 -1.9044 3.45492   2
  26   2  11 10.6508 11.2460  -1
 -26   2  20 10.6508 11.2460   2
  28   2  11 -7.5560 11.7579  -1
 -28   2  20 -7.5560 11.7579   2
  30   2  11 -2.4597 7.24626  -1
 -30   2  21 -2.4597 7.24626   2
 -35   3  11 3.05193 14.9349  -1
 -35   3   1 3.05193 14.9349   2
 -33   3  11 8.14796 7.44721  -1
  33   3   0 8.14796 7.44721   2
 -31   3  11 15.7394 11.8472  -1
  31   3   1 15.7394 11.8472   2
 -29   3  11 24.1726 6.38119  -1
  29   3   1 24.1726 6.38119   2
 -27   3  11 13.4206 2.90296  -1
  27   3   2 13.4206 2.90296   2
 -25   3  11 128.022 5.30187  -1
  25   3   3 128.022 5.30187   2
 -23   3  11 264.388 6.55775  -1
  23   3   3 264.388 6.55775   2
 -21   3  11 278.295 4.94942  -1
  21   3   4 278.295 4.94942   2
 -19   3  11 328.613 5.35931  -1
  19   3   5 328.613 5.35931   2
 -17   3  11 530.080 6.89189  -1
  17   3   5 530.080 6.89189   2
 -15   3  11 287.816 3.57060  -1
  15   3   6 287.816 3.57060   2
 -13   3  11 441.506 6.35695  -1
  13   3   7 441.506 6.35695   2
 -11   3  11 496.387 6.20444  -1
  11   3   7 496.387 6.20444   2
  -9   3  11 239.258 2.68738  -1
   9   3   8 239.258 2.68738   2
  -7   3  11 290.884 3.69018  -1
   7   3   9 290.884 3.69018   2
  -5   3  11 354.756 4.74699  -1
   5   3   9 354.756 4.74699   2
  -3   3  11 275.378 2.90324  -1
   3   3  10 275.378 2.90324   2
  -1   3  11 217.105 3.36533  -1
   1   3  11 217.105 3.36533   2
   1   3  11 217.155 3.13367  -1
  -1   3  11 217.155 3.13367   2
   3   3  11 27.1042 0.92840  -1
  -3   3  12 27.1042 0.92840   2
   5   3  11 139.739 2.66525  -1
  -5   3  13 139.739 2.66525   2
   7   3  11 313.967 4.69991  -1
  -7   3  13 313.967 4.69991   2
   9   3  11 279.033 3.30643  -1
  -9   3  14 279.033 3.30643   2
  11   3  11 336.677 5.95601  -1
 -11   3  15 336.677 5.95601   2
  13   3  11 405.600 7.53845  -1
 -13   3  15 405.600 7.53845   2
  15   3  11 106.055 2.63271  -1
 -15   3  16 106.055 2.63271   2
  17   3  11 174.658 4.79737  -1
 -17   3  17 174.658 4.79737   2
  19   3  11 127.993 6.49380  -1
 -19   3  17 127.993 6.49380   2
  21   3  11 28.3158 2.99780  -1
 -21   3  18 28.3158 2.99780   2
  23   3  11 19.2721 11.0505  -1
 -23   3  19 19.2721 11.0505   2
  25   3  11 23.4221 11.8737  -1
 -25   3  19 23.4221 11.8737   2
  27   3  11 2.33424 4.61629  -1
 -27   3  20 2.33424 4.61629   2
  29   3  11 38.5693 14.0946  -1
 -29   3  21 38.5693 14.0946   2
  31   3  11 1.22721 13.6070  -1
 -31   3  21 1.22721 13.6070   2
 -32   4  11 57.8618 13.4282  -1
  32   4   0 57.8618 13.4282   2
 -30   4  11 40.1943 6.25678  -1
  30   4   1 40.1943 6.25678   2
 -28   4  11 3.07120 7.07475  -1
  28   4   2 3.07120 7.07475   2
 -26   4  11 15.9565 4.70734  -1
  26   4   2 15.9565 4.70734   2
 -24   4  11 61.0459 3.16334  -1
  24   4   3 61.0459 3.16334   2
 -22   4  11 119.754 4.79219  -1
  22   4   4 119.754 4.79219   2
 -20   4  11 44.8903 3.33375  -1
  20   4   4 44.8903 3.33375   2
 -18   4  11 128.438 2.82486  -1
  18   4   5 128.438 2.82486   2
 -16   4  11 257.066 4.50325  -1
  16   4   6 257.066 4.50325   2
 -14   4  11 70.3068 2.63801  -1
  14   4   6 70.3068 2.63801   2
 -12   4  11 93.9784 1.79856  -1
  12   4   7 93.9784 1.79856   2
 -10   4  11 348.156 4.32821  -1
  10   4   8 348.156 4.32821   2
  -8   4  11 349.571 4.56720  -1
   8   4   8 349.571 4.56720   2
  -6   4  11 425.340 4.13159  -1
   6   4   9 425.340 4.13159   2
  -4   4  11 519.011 6.90047  -1
   4   4  10 519.011 6.90047   2
  -2   4  11 797.475 9.63520  -1
   2   4  10 797.475 9.63520   2
   0   4  11 221.586 2.52682  -1
   0   4  11 221.586 2.52682   2
   2   4  11 56.7541 2.04717  -1
  -2   4  12 56.7541 2.04717   2
   4   4  11 127.271 2.84637  -1
  -4   4  12 127.271 2.84637   2
   6   4  11 153.969 2.08157  -1
  -6   4  13 153.969 2.08157   2
   8   4  11 49.0949 2.32287  -1
  -8   4  14 49.0949 2.32287   2
  10   4  11 25.3508 2.49582  -1
 -10   4  14 25.3508 2.49582   2
  12   4  11 200.619 2.97396  -1
 -12   4  15 200.619 2.97396   2
  14   4  11 106.166 3.75921  -1
 -14   4  16 106.166 3.75921   2
  16   4  11 44.9894 4.68797  -1
 -16   4  16 44.9894 4.68797   2
  18   4  11 11.8404 2.43196  -1
 -18   4  17 11.8404 2.43196   2
  20   4  11 73.3456 8.06221  -1
 -20   4  18 73.3456 8.06221   2
  22   4  11 50.0365 7.91096  -1
 -22   4  18 50.0365 7.91096   2
  24   4  11 74.7579 5.00921  -1
 -24   4  19 74.7579 5.00921   2
  26   4  11 34.4741 12.3732  -1
 -26   4  20 34.4741 12.3732   2
  28   4  11 42.5270 13.1649  -1
 -28   4  20 42.5270 13.1649   2
  30   4  11 38.3433 11.8946  -1
 -30   4  21 38.3433 11.8946   2
 -33   5  11 35.1888 12.6800  -1
  33   5   0 35.1888 12.6800   2
 -31   5  11 60.9213 10.8570  -1
  31   5   1 60.9213 10.8570   2
 -29   5  11 52.9198 9.72171  -1
  29   5   1 52.9198 9.72171   2
 -27   5  11 15.4826 3.59489  -1
  27   5   2 15.4826 3.59489   2
 -25   5  11 3.45764 4.43271  -1
  25   5   3 3.45764 4.43271   2
 -23   5  11 13.7819 4.44225  -1
  23   5   3 13.7819 4.44225   2
 -21   5  11 1.45509 2.50472  -1
  21   5   4 1.45509 2.50472   2
 -19   5  11 -2.0797 2.83448  -1
  19   5   5 -2.0797 2.83448   2
 -17   5  11 9.03745 2.59393  -1
  17   5   5 9.03745 2.59393   2
 -15   5  11 18.9496 1.62549  -1
  15   5   6 18.9496 1.62549   2
 -13   5  11 15.9681 2.19822  -1
  13   5   7 15.9681 2.19822   2
 -11   5  11 184.173 3.33477  -1
  11   5   7 184.173 3.33477   2
  -9   5  11 410.388 4.24534  -1
   9   5   8 410.388 4.24534   2
  -7   5  11 570.782 6.36295  -1
   7   5   9 570.782 6.36295   2
  -5   5  11 868.281 10.1978  -1
   5   5   9 868.281 10.1978   2
  -3   5  11 637.607 5.87435  -1
   3   5  10 637.607 5.87435   2
  -1   5  11 955.242 11.2462  -1
   1   5  11 955.242 11.2462   2
   1   5  11 959.255 11.5261  -1
  -1   5  11 959.255 11.5261   2
   3   5  11 102.718 1.69475  -1
  -3   5  12 102.718 1.69475   2
   5   5  11 162.934 3.10440  -1
  -5   5  13 162.934 3.10440   2
   7   5  11 219.914 3.80611  -1
  -7   5  13 219.914 3.80611   2
   9   5  11 16.8401 1.33323  -1
  -9   5  14 16.8401 1.33323   2
  11   5  11 129.029 4.23335  -1
 -11   5  15 129.029 4.23335   2
  13   5  11 57.3493 4.12685  -1
 -13   5  15 57.3493 4.12685   2
  15   5  11 16.3562 2.24243  -1
 -15   5  16 16.3562 2.24243   2
  17   5  11 151.626 6.26760  -1
 -17   5  17 151.626 6.26760   2
  19   5  11 80.2930 6.64130  -1
 -19   5  17 80.2930 6.64130   2
  21   5  11 45.7694 3.17848  -1
 -21   5  18 45.7694 3.17848   2
  23   5  11 92.9408 9.22601  -1
 -23   5  19 92.9408 9.22601   2
  25   5  11 58.6015 8.79522  -1
 -25   5  19 58.6015 8.79522   2
  27   5  11 21.0095 5.73613  -1
 -27   5  20 21.0095 5.73613   2
  29   5  11 28.1919 14.1934  -1
 -29   5  21 28.1919 14.1934   2
  31   5  11 33.9862 14.9536  -1
 -31   5  21 33.9862 14.9536   2
 -30   6  11 53.6968 7.04752  -1
  30   6   1 53.6968 7.04752   2
 -28   6  11 32.2404 9.54453  -1
  28   6   2 32.2404 9.54453   2
 -26   6  11 24.5158 5.04976  -1
  26   6   2 24.5158 5.04976   2
 -24   6  11 30.6489 3.01698  -1
  24   6   3 30.6489 3.01698   2
 -22   6  11 81.9960 4.70753  -1
  22   6   4 81.9960 4.70753   2
 -20   6  11 157.430 5.42897  -1
  20   6   4 157.430 5.42897   2
 -18   6  11 35.5811 2.19029  -1
  18   6   5 35.5811 2.19029   2
 -16   6  11 207.248 4.65652  -1
  16   6   6 207.248 4.65652   2
 -14   6  11 320.200 5.61313  -1
  14   6   6 320.200 5.61313   2
 -12   6  11 82.8480 2.00284  -1
  12   6   7 82.8480 2.00284   2
 -10   6  11 356.572 5.05641  -1
  10   6   8 356.572 5.05641   2
  -8   6  11 398.566 5.03133  -1
   8   6   8 398.566 5.03133   2
  -6   6  11 376.378 3.93707  -1
   6   6   9 376.378 3.93707   2
  -4   6  11 466.499 5.88034  -1
   4   6  10 466.499 5.88034   2
  -2   6  11 235.025 4.35053  -1
   2   6  10 235.025 4.35053   2
   0   6  11 449.875 4.81713  -1
   0   6  11 449.875 4.81713   2
   2   6  11 263.121 4.92235  -1
  -2   6  12 263.121 4.92235   2
   4   6  11 114.062 2.82680  -1
  -4   6  12 114.062 2.82680   2
   6   6  11 144.102 2.26961  -1
  -6   6  13 144.102 2.26961   2
   8   6  11 136.765 3.26330  -1
  -8   6  14 136.765 3.26330   2
  10   6  11 114.375 4.31135  -1
 -10   6  14 114.375 4.31135   2
  12   6  11 13.9421 1.91457  -1
 -12   6  15 13.9421 1.91457   2
  14   6  11 107.597 5.58604  -1
 -14   6  16 107.597 5.58604   2
  16   6  11 142.134 6.29102  -1
 -16   6  16 142.134 6.29102   2
  18   6  11 58.9491 3.22930  -1
 -18   6  17 58.9491 3.22930   2
  20   6  11 46.8706 6.49580  -1
 -20   6  18 46.8706 6.49580   2
  22   6  11 43.7284 8.00757  -1
 -22   6  18 43.7284 8.00757   2
  24   6  11 52.5440 4.33291  -1
 -24   6  19 52.5440 4.33291   2
  26   6  11 20.8864 13.0742  -1
 -26   6  20 20.8864 13.0742   2
  28   6  11 34.8518 14.9433  -1
 -28   6  20 34.8518 14.9433   2
  30   6  11 8.88366 11.2477  -1
 -30   6  21 8.88366 11.2477   2
 -33   7  11 -7.6572 11.5991  -1
  33   7   0 -7.6572 11.5991   2
 -29   7  11 3.47799 9.42744  -1
  29   7   1 3.47799 9.42744   2
 -27   7  11 13.5389 5.24131  -1
  27   7   2 13.5389 5.24131   2
 -25   7  11 9.79163 4.84584  -1
  25   7   3 9.79163 4.84584   2
 -23   7  11 16.3229 4.92964  -1
  23   7   3 16.3229 4.92964   2
 -21   7  11 142.220 4.23829  -1
  21   7   4 142.220 4.23829   2
 -19   7  11 1.99564 3.44262  -1
  19   7   5 1.99564 3.44262   2
 -19   7  11 107.765 9.66652  -1
  19   7   4 107.765 9.66652   2
 -17   7  11 27.2059 3.17151  -1
  17   7   5 27.2059 3.17151   2
 -15   7  11 287.565 4.39628  -1
  15   7   6 287.565 4.39628   2
 -13   7  11 21.0819 2.77364  -1
  13   7   7 21.0819 2.77364   2
 -11   7  11 79.8883 3.16197  -1
  11   7   7 79.8883 3.16197   2
  -9   7  11 25.2224 1.47851  -1
   9   7   8 25.2224 1.47851   2
  -7   7  11 16.3035 2.17668  -1
   7   7   9 16.3035 2.17668   2
  -5   7  11 115.549 2.88275  -1
   5   7   9 115.549 2.88275   2
  -3   7  11 33.1386 1.46841  -1
   3   7  10 33.1386 1.46841   2
  -1   7  11 134.813 3.38720  -1
   1   7  11 134.813 3.38720   2
   1   7  11 140.271 3.11389  -1
  -1   7  11 140.271 3.11389   2
   3   7  11 60.5812 1.57497  -1
  -3   7  12 60.5812 1.57497   2
   5   7  11 38.1881 2.32662  -1
  -5   7  13 38.1881 2.32662   2
   7   7  11 34.4966 2.91586  -1
  -7   7  13 34.4966 2.91586   2
   9   7  11 15.5791 1.71524  -1
  -9   7  14 15.5791 1.71524   2
  11   7  11 -1.2591 2.71016  -1
 -11   7  15 -1.2591 2.71016   2
  13   7  11 34.7237 4.83997  -1
 -13   7  15 34.7237 4.83997   2
  15   7  11 89.7496 3.31733  -1
 -15   7  16 89.7496 3.31733   2
  17   7  11 3.05368 4.54496  -1
 -17   7  17 3.05368 4.54496   2
  19   7  11 3.87258 5.86306  -1
 -19   7  17 3.87258 5.86306   2
  21   7  11 62.5716 3.66864  -1
 -21   7  18 62.5716 3.66864   2
  23   7  11 7.85974 12.5114  -1
 -23   7  19 7.85974 12.5114   2
  25   7  11 10.8255 13.2383  -1
 -25   7  19 10.8255 13.2383   2
  27   7  11 6.91527 7.60513  -1
 -27   7  20 6.91527 7.60513   2
  29   7  11 -9.5952 13.7770  -1
 -29   7  21 -9.5952 13.7770   2
 -30   8  11 10.4893 8.48616  -1
  30   8   1 10.4893 8.48616   2
 -28   8  11 20.3113 17.1929  -1
  28   8   2 20.3113 17.1929   2
 -26   8  11 12.1610 9.01358  -1
  26   8   2 12.1610 9.01358   2
 -24   8  11 4.01011 3.54957  -1
  24   8   3 4.01011 3.54957   2
 -22   8  11 53.8434 4.83782  -1
  22   8   4 53.8434 4.83782   2
 -20   8  11 89.4067 4.22387  -1
  20   8   4 89.4067 4.22387   2
 -18   8  11 25.4147 2.71357  -1
  18   8   5 25.4147 2.71357   2
 -16   8  11 148.717 4.55417  -1
  16   8   6 148.717 4.55417   2
 -14   8  11 180.273 4.66112  -1
  14   8   6 180.273 4.66112   2
 -12   8  11 21.8193 2.28129  -1
  12   8   7 21.8193 2.28129   2
 -10   8  11 108.485 4.06481  -1
  10   8   8 108.485 4.06481   2
  -8   8  11 294.184 5.35530  -1
   8   8   8 294.184 5.35530   2
  -6   8  11 194.515 3.77499  -1
   6   8   9 194.515 3.77499   2
  -4   8  11 64.9891 2.97802  -1
   4   8  10 64.9891 2.97802   2
  -2   8  11 196.184 4.16208  -1
   2   8  10 196.184 4.16208   2
   0   8  11 185.652 3.06975  -1
   0   8  11 185.652 3.06975   2
   2   8  11 40.1637 2.76496  -1
  -2   8  12 40.1637 2.76496   2
   4   8  11 45.0517 2.86871  -1
  -4   8  12 45.0517 2.86871   2
   6   8  11 114.847 2.25157  -1
  -6   8  13 114.847 2.25157   2
   8   8  11 20.1288 2.87844  -1
  -8   8  14 20.1288 2.87844   2
  10   8  11 76.8050 3.70801  -1
 -10   8  14 76.8050 3.70801   2
  12   8  11 3.20098 2.30204  -1
 -12   8  15 3.20098 2.30204   2
  14   8  11 22.3762 4.62396  -1
 -14   8  16 22.3762 4.62396   2
  16   8  11 41.7238 5.60279  -1
 -16   8  16 41.7238 5.60279   2
  18   8  11 32.2547 3.16001  -1
 -18   8  17 32.2547 3.16001   2
  20   8  11 2.79291 7.34802  -1
 -20   8  18 2.79291 7.34802   2
  22   8  11 44.9930 13.8370  -1
 -22   8  18 44.9930 13.8370   2
  24   8  11 27.9498 6.30639  -1
 -24   8  19 27.9498 6.30639   2
  26   8  11 25.0669 14.6014  -1
 -26   8  20 25.0669 14.6014   2
  28   8  11 8.35563 14.2879  -1
 -28   8  20 8.35563 14.2879   2
 -27   9  11 34.9785 7.09604  -1
  27   9   2 34.9785 7.09604   2
 -25   9  11 34.2543 16.4270  -1
  25   9   3 34.2543 16.4270   2
 -23   9  11 19.7254 9.07679  -1
  23   9   3 19.7254 9.07679   2
 -21   9  11 43.5567 3.48842  -1
  21   9   4 43.5567 3.48842   2
 -19   9  11 17.8117 4.79488  -1
  19   9   5 17.8117 4.79488   2
 -17   9  11 14.8185 5.52013  -1
  17   9   5 14.8185 5.52013   2
 -15   9  11 57.3699 3.06983  -1
  15   9   6 57.3699 3.06983   2
 -13   9  11 82.0931 4.75726  -1
  13   9   7 82.0931 4.75726   2
 -11   9  11 191.684 5.49942  -1
  11   9   7 191.684 5.49942   2
  -9   9  11 302.361 5.07773  -1
   9   9   8 302.361 5.07773   2
  -7   9  11 371.856 7.34198  -1
   7   9   9 371.856 7.34198   2
  -5   9  11 473.776 7.72410  -1
   5   9   9 473.776 7.72410   2
  -3   9  11 335.290 4.25667  -1
   3   9  10 335.290 4.25667   2
  -1   9  11 777.632 10.8305  -1
   1   9  11 777.632 10.8305   2
   1   9  11 785.622 10.7164  -1
  -1   9  11 785.622 10.7164   2
   3   9  11 125.355 2.87504  -1
  -3   9  12 125.355 2.87504   2
   5   9  11 216.293 5.93673  -1
  -5   9  13 216.293 5.93673   2
   7   9  11 293.741 7.25789  -1
  -7   9  13 293.741 7.25789   2
   9   9  11 43.8986 2.61334  -1
  -9   9  14 43.8986 2.61334   2
  11   9  11 49.6397 4.56969  -1
 -11   9  15 49.6397 4.56969   2
  13   9  11 2.95811 5.79462  -1
 -13   9  15 2.95811 5.79462   2
  15   9  11 25.4307 3.38592  -1
 -15   9  16 25.4307 3.38592   2
  17   9  11 62.0676 6.19541  -1
 -17   9  17 62.0676 6.19541   2
  19   9  11 45.2452 6.20445  -1
 -19   9  17 45.2452 6.20445   2
  21   9  11 42.5318 4.78695  -1
 -21   9  18 42.5318 4.78695   2
  23   9  11 67.4945 11.0306  -1
 -23   9  19 67.4945 11.0306   2
  25   9  11 50.9390 15.6066  -1
 -25   9  19 50.9390 15.6066   2
 -24  10  11 20.6997 6.76772  -1
  24  10   3 20.6997 6.76772   2
 -22  10  11 13.7543 10.4194  -1
  22  10   4 13.7543 10.4194   2
 -20  10  11 16.3709 6.70096  -1
  20  10   4 16.3709 6.70096   2
 -18  10  11 -1.8124 2.88567  -1
  18  10   5 -1.8124 2.88567   2
 -16  10  11 -0.8228 5.00020  -1
  16  10   6 -0.8228 5.00020   2
 -14  10  11 20.5449 4.65794  -1
  14  10   6 20.5449 4.65794   2
 -12  10  11 76.9474 3.40721  -1
  12  10   7 76.9474 3.40721   2
 -10  10  11 106.265 5.78572  -1
  10  10   8 106.265 5.78572   2
  -8  10  11 183.975 6.45851  -1
   8  10   8 183.975 6.45851   2
  -6  10  11 221.202 4.22722  -1
   6  10   9 221.202 4.22722   2
  -4  10  11 356.148 6.45250  -1
   4  10  10 356.148 6.45250   2
  -2  10  11 318.288 6.27136  -1
   2  10  10 318.288 6.27136   2
   0  10  11 289.637 4.36266  -1
   0  10  11 289.637 4.36266   2
   2  10  11 191.187 5.29135  -1
  -2  10  12 191.187 5.29135   2
   4  10  11 104.755 4.38761  -1
  -4  10  12 104.755 4.38761   2
   6  10  11 60.6421 2.58515  -1
  -6  10  13 60.6421 2.58515   2
   8  10  11 8.41851 5.28250  -1
  -8  10  14 8.41851 5.28250   2
  10  10  11 15.1173 5.62114  -1
 -10  10  14 15.1173 5.62114   2
  12  10  11 18.1575 2.81102  -1
 -12  10  15 18.1575 2.81102   2
  14  10  11 14.1844 6.29325  -1
 -14  10  16 14.1844 6.29325   2
  16  10  11 10.0178 5.60804  -1
 -16  10  16 10.0178 5.60804   2
  18  10  11 10.5955 3.58494  -1
 -18  10  17 10.5955 3.58494   2
  20  10  11 13.7003 12.4872  -1
 -20  10  18 13.7003 12.4872   2
  22  10  11 13.4312 13.8596  -1
 -22  10  18 13.4312 13.8596   2
  24  10  11 28.0230 11.6343  -1
 -24  10  19 28.0230 11.6343   2
 -27  11  11 8.91082 12.9928  -1
  27  11   2 8.91082 12.9928   2
 -23  11  11 39.6893 11.7688  -1
  23  11   3 39.6893 11.7688   2
 -21  11  11 62.4931 7.13621  -1
  21  11   4 62.4931 7.13621   2
 -19  11  11 75.3818 11.4471  -1
  19  11   5 75.3818 11.4471   2
 -17  11  11 52.5238 6.81041  -1
  17  11   5 52.5238 6.81041   2
 -15  11  11 31.3566 3.44891  -1
  15  11   6 31.3566 3.44891   2
 -13  11  11 36.0426 6.51464  -1
  13  11   7 36.0426 6.51464   2
 -11  11  11 55.5362 7.36354  -1
  11  11   7 55.5362 7.36354   2
  -9  11  11 24.3609 3.04726  -1
   9  11   8 24.3609 3.04726   2
  -7  11  11 37.6486 5.31825  -1
   7  11   9 37.6486 5.31825   2
  -5  11  11 83.3146 4.79526  -1
   5  11   9 83.3146 4.79526   2
  -3  11  11 98.2614 3.02292  -1
   3  11  10 98.2614 3.02292   2
  -1  11  11 7.90361 4.41275  -1
   1  11  11 7.90361 4.41275   2
   1  11  11 12.2804 3.97489  -1
  -1  11  11 12.2804 3.97489   2
   3  11  11 34.9630 2.30513  -1
  -3  11  12 34.9630 2.30513   2
   5  11  11 31.1585 4.36973  -1
  -5  11  13 31.1585 4.36973   2
   7  11  11 90.5978 6.42407  -1
  -7  11  13 90.5978 6.42407   2
   9  11  11 96.8170 3.97818  -1
  -9  11  14 96.8170 3.97818   2
  11  11  11 73.1602 6.62828  -1
 -11  11  15 73.1602 6.62828   2
  13  11  11 70.1072 6.26548  -1
 -13  11  15 70.1072 6.26548   2
  15  11  11 42.6494 3.59178  -1
 -15  11  16 42.6494 3.59178   2
  17  11  11 23.5466 7.29892  -1
 -17  11  17 23.5466 7.29892   2
  19  11  11 -5.1936 15.2661  -1
 -19  11  17 -5.1936 15.2661   2
  21  11  11 15.5328 7.37275  -1
 -21  11  18 15.5328 7.37275   2
  23  11  11 0.70033 13.4433  -1
 -23  11  19 0.70033 13.4433   2
 -20  12  11 73.1431 15.2556  -1
  20  12   4 73.1431 15.2556   2
 -18  12  11 143.910 6.69627  -1
  18  12   5 143.910 6.69627   2
 -16  12  11 86.7968 9.08411  -1
  16  12   6 86.7968 9.08411   2
 -14  12  11 72.6606 8.54787  -1
  14  12   6 72.6606 8.54787   2
 -12  12  11 102.909 5.32492  -1
  12  12   7 102.909 5.32492   2
 -10  12  11 32.5972 6.43240  -1
  10  12   8 32.5972 6.43240   2
  -8  12  11 8.30372 6.86952  -1
   8  12   8 8.30372 6.86952   2
  -6  12  11 3.79104 2.57186  -1
   6  12   9 3.79104 2.57186   2
  -4  12  11 7.15976 4.65633  -1
   4  12  10 7.15976 4.65633   2
  -2  12  11 6.81033 4.32755  -1
   2  12  10 6.81033 4.32755   2
   0  12  11 11.0135 2.22483  -1
   0  12  11 11.0135 2.22483   2
   2  12  11 37.7208 4.38242  -1
  -2  12  12 37.7208 4.38242   2
   4  12  11 58.2918 4.87436  -1
  -4  12  12 58.2918 4.87436   2
   6  12  11 115.993 3.73814  -1
  -6  12  13 115.993 3.73814   2
   8  12  11 142.612 7.62857  -1
  -8  12  14 142.612 7.62857   2
  10  12  11 131.439 8.93355  -1
 -10  12  14 131.439 8.93355   2
  12  12  11 82.2370 5.14327  -1
 -12  12  15 82.2370 5.14327   2
  14  12  11 65.9747 8.17922  -1
 -14  12  16 65.9747 8.17922   2
  16  12  11 85.6149 11.1826  -1
 -16  12  16 85.6149 11.1826   2
  18  12  11 58.6244 12.7782  -1
 -18  12  17 58.6244 12.7782   2
 -15  13  11 2.88785 6.53785  -1
  15  13   6 2.88785 6.53785   2
 -13  13  11 27.2427 14.9886  -1
  13  13   7 27.2427 14.9886   2
 -11  13  11 28.6200 15.4905  -1
  11  13   7 28.6200 15.4905   2
  -9  13  11 9.62992 3.49973  -1
   9  13   8 9.62992 3.49973   2
  -7  13  11 3.51819 6.88439  -1
   7  13   9 3.51819 6.88439   2
  -5  13  11 -1.1412 6.97615  -1
   5  13   9 -1.1412 6.97615   2
  -3  13  11 52.2241 3.31992  -1
   3  13  10 52.2241 3.31992   2
  -1  13  11 23.2509 4.96508  -1
   1  13  11 23.2509 4.96508   2
   1  13  11 19.4740 4.77629  -1
  -1  13  11 19.4740 4.77629   2
   3  13  11 38.3405 2.92426  -1
  -3  13  12 38.3405 2.92426   2
   5  13  11 57.7089 5.98725  -1
  -5  13  13 57.7089 5.98725   2
   7  13  11 81.9457 8.62426  -1
  -7  13  13 81.9457 8.62426   2
   9  13  11 44.7837 4.75343  -1
  -9  13  14 44.7837 4.75343   2
  11  13  11 46.9337 8.97288  -1
 -11  13  15 46.9337 8.97288   2
  13  13  11 68.2211 15.5417  -1
 -13  13  15 68.2211 15.5417   2
  15  13  11 29.8780 6.83035  -1
 -15  13  16 29.8780 6.83035   2
 -14  14  11 -18.333 14.4351  -1
  14  14   6 -18.333 14.4351   2
 -12  14  11 3.79411 8.90043  -1
  12  14   7 3.79411 8.90043   2
 -10  14  11 24.2820 11.3368  -1
  10  14   8 24.2820 11.3368   2
  -8  14  11 34.5476 8.55173  -1
   8  14   8 34.5476 8.55173   2
  -6  14  11 2.08430 3.83630  -1
   6  14   9 2.08430 3.83630   2
  -4  14  11 53.7176 7.53465  -1
   4  14  10 53.7176 7.53465   2
  -2  14  11 72.7199 6.96379  -1
   2  14  10 72.7199 6.96379   2
   0  14  11 0.78874 2.96837  -1
   0  14  11 0.78874 2.96837   2
   2  14  11 8.55686 5.20370  -1
  -2  14  12 8.55686 5.20370   2
   4  14  11 51.9608 6.17846  -1
  -4  14  12 51.9608 6.17846   2
   6  14  11 3.47325 3.34183  -1
  -6  14  13 3.47325 3.34183   2
   8  14  11 7.25886 11.0369  -1
  -8  14  14 7.25886 11.0369   2
  10  14  11 -7.2430 14.4741  -1
 -10  14  14 -7.2430 14.4741   2
  12  14  11 1.63807 11.1518  -1
 -12  14  15 1.63807 11.1518   2
  -9  15  11 -6.6688 9.50369  -1
   9  15   8 -6.6688 9.50369   2
  -7  15  11 23.3319 16.6603  -1
   7  15   9 23.3319 16.6603   2
  -5  15  11 -9.4730 16.2630  -1
   5  15   9 -9.4730 16.2630   2
  -3  15  11 35.5096 6.73230  -1
   3  15  10 35.5096 6.73230   2
  -1  15  11 27.5339 9.91685  -1
   1  15  11 27.5339 9.91685   2
   1  15  11 26.9248 9.65384  -1
  -1  15  11 26.9248 9.65384   2
   3  15  11 28.5263 7.01132  -1
  -3  15  12 28.5263 7.01132   2
   5  15  11 -11.716 14.6749  -1
  -5  15  13 -11.716 14.6749   2
   7  15  11 25.7665 14.1565  -1
  -7  15  13 25.7665 14.1565   2
 -34   0  12 9.47476 15.0258  -1
  34   0   1 9.47476 15.0258   2
 -32   0  12 10.8165 13.3728  -1
  32   0   1 10.8165 13.3728   2
 -30   0  12 2.15043 8.88825  -1
  30   0   2 2.15043 8.88825   2
 -28   0  12 -7.5123 5.68553  -1
  28   0   3 -7.5123 5.68553   2
 -26   0  12 2.99441 6.22467  -1
  26   0   3 2.99441 6.22467   2
 -24   0  12 8.11649 3.29951  -1
  24   0   4 8.11649 3.29951   2
 -22   0  12 13.8263 5.46362  -1
  22   0   5 13.8263 5.46362   2
 -20   0  12 -6.1851 3.48152  -1
  20   0   5 -6.1851 3.48152   2
 -18   0  12 252.283 4.45076  -1
  18   0   6 252.283 4.45076   2
 -16   0  12 238.655 7.80723  -1
  16   0   7 238.655 7.80723   2
 -14   0  12 495.923 10.1114  -1
  14   0   7 495.923 10.1114   2
 -12   0  12 1214.34 14.7659  -1
  12   0   8 1214.34 14.7659   2
 -10   0  12 768.155 11.4848  -1
  10   0   9 768.155 11.4848   2
  -8   0  12 1631.98 24.8404  -1
   8   0   9 1631.98 24.8404   2
  -6   0  12 2039.18 26.9632  -1
   6   0  10 2039.18 26.9632   2
  -4   0  12 513.241 8.55627  -1
   4   0  11 513.241 8.55627   2
  -2   0  12 383.689 6.34541  -1
   2   0  11 383.689 6.34541   2
   0   0  12 436.248 6.18571  -1
   0   0  12 436.248 6.18571   2
   2   0  12 439.427 8.37640  -1
  -2   0  13 439.427 8.37640   2
   4   0  12 17.0634 2.20210  -1
  -4   0  13 17.0634 2.20210   2
   6   0  12 58.0859 1.97466  -1
  -6   0  14 58.0859 1.97466   2
   8   0  12 5.67270 2.56484  -1
  -8   0  15 5.67270 2.56484   2
  10   0  12 11.4821 3.66746  -1
 -10   0  15 11.4821 3.66746   2
  12   0  12 144.349 4.79513  -1
 -12   0  16 144.349 4.79513   2
  14   0  12 38.3343 4.47438  -1
 -14   0  17 38.3343 4.47438   2
  16   0  12 30.9060 4.33234  -1
 -16   0  17 30.9060 4.33234   2
  18   0  12 93.8597 3.88719  -1
 -18   0  18 93.8597 3.88719   2
  20   0  12 198.291 9.70500  -1
 -20   0  19 198.291 9.70500   2
  22   0  12 237.771 14.6265  -1
 -22   0  19 237.771 14.6265   2
  24   0  12 110.794 6.14404  -1
 -24   0  20 110.794 6.14404   2
 -35   1  12 16.0909 14.5983  -1
  35   1   0 16.0909 14.5983   2
 -33   1  12 1.05330 10.4752  -1
  33   1   1 1.05330 10.4752   2
 -31   1  12 29.9154 12.9672  -1
  31   1   2 29.9154 12.9672   2
 -29   1  12 19.2695 4.88637  -1
  29   1   2 19.2695 4.88637   2
 -27   1  12 9.30552 3.30003  -1
  27   1   3 9.30552 3.30003   2
 -25   1  12 5.68503 4.52383  -1
  25   1   4 5.68503 4.52383   2
 -23   1  12 8.27060 3.12262  -1
  23   1   4 8.27060 3.12262   2
 -21   1  12 16.0814 1.73889  -1
  21   1   5 16.0814 1.73889   2
 -19   1  12 7.94245 3.13845  -1
  19   1   6 7.94245 3.13845   2
 -17   1  12 24.8347 2.67297  -1
  17   1   6 24.8347 2.67297   2
 -15   1  12 126.467 2.04714  -1
  15   1   7 126.467 2.04714   2
 -13   1  12 384.526 6.19924  -1
  13   1   8 384.526 6.19924   2
 -11   1  12 509.540 6.31632  -1
  11   1   8 509.540 6.31632   2
  -9   1  12 611.052 6.09005  -1
   9   1   9 611.052 6.09005   2
  -7   1  12 1225.46 13.5195  -1
   7   1  10 1225.46 13.5195   2
  -5   1  12 371.468 4.42918  -1
   5   1  10 371.468 4.42918   2
  -3   1  12 606.355 5.77435  -1
   3   1  11 606.355 5.77435   2
  -1   1  12 267.362 3.45284  -1
   1   1  12 267.362 3.45284   2
   1   1  12 287.175 4.18277  -1
  -1   1  12 287.175 4.18277   2
   3   1  12 152.202 2.04243  -1
  -3   1  13 152.202 2.04243   2
   5   1  12 64.5018 2.14935  -1
  -5   1  14 64.5018 2.14935   2
   7   1  12 82.0402 2.55346  -1
  -7   1  14 82.0402 2.55346   2
   9   1  12 66.4428 1.69101  -1
  -9   1  15 66.4428 1.69101   2
  11   1  12 216.794 4.03193  -1
 -11   1  16 216.794 4.03193   2
  13   1  12 87.2271 3.33810  -1
 -13   1  16 87.2271 3.33810   2
  15   1  12 20.7097 1.78522  -1
 -15   1  17 20.7097 1.78522   2
  17   1  12 156.223 6.61814  -1
 -17   1  18 156.223 6.61814   2
  19   1  12 137.687 5.73656  -1
 -19   1  18 137.687 5.73656   2
  21   1  12 125.499 3.95835  -1
 -21   1  19 125.499 3.95835   2
  23   1  12 82.9645 5.99004  -1
 -23   1  20 82.9645 5.99004   2
  25   1  12 84.2954 13.1073  -1
 -25   1  20 84.2954 13.1073   2
  27   1  12 37.8787 9.14628  -1
 -27   1  21 37.8787 9.14628   2
 -36   2  12 0.85129 12.0201  -1
  36   2   0 0.85129 12.0201   2
 -32   2  12 -7.9620 8.76599  -1
  32   2   1 -7.9620 8.76599   2
 -30   2  12 0.79969 4.44070  -1
  30   2   2 0.79969 4.44070   2
 -28   2  12 66.1074 7.31139  -1
  28   2   3 66.1074 7.31139   2
 -26   2  12 68.7309 4.49664  -1
  26   2   3 68.7309 4.49664   2
 -24   2  12 69.5541 3.18076  -1
  24   2   4 69.5541 3.18076   2
 -22   2  12 161.085 5.26106  -1
  22   2   5 161.085 5.26106   2
 -20   2  12 210.138 4.12314  -1
  20   2   5 210.138 4.12314   2
 -18   2  12 64.5539 1.85467  -1
  18   2   6 64.5539 1.85467   2
 -16   2  12 77.3283 3.04306  -1
  16   2   7 77.3283 3.04306   2
 -14   2  12 117.258 2.95276  -1
  14   2   7 117.258 2.95276   2
 -12   2  12 39.1052 1.17770  -1
  12   2   8 39.1052 1.17770   2
 -10   2  12 199.245 3.41769  -1
  10   2   9 199.245 3.41769   2
  -8   2  12 222.177 3.28789  -1
   8   2   9 222.177 3.28789   2
  -6   2  12 110.057 1.61489  -1
   6   2  10 110.057 1.61489   2
  -4   2  12 388.897 4.64924  -1
   4   2  11 388.897 4.64924   2
  -2   2  12 406.581 4.74350  -1
   2   2  11 406.581 4.74350   2
   0   2  12 396.235 4.12682  -1
   0   2  12 396.235 4.12682   2
   2   2  12 555.698 7.25329  -1
  -2   2  13 555.698 7.25329   2
   4   2  12 121.081 2.50095  -1
  -4   2  13 121.081 2.50095   2
   6   2  12 209.052 2.35556  -1
  -6   2  14 209.052 2.35556   2
   8   2  12 306.435 5.14312  -1
  -8   2  15 306.435 5.14312   2
  10   2  12 260.776 4.70460  -1
 -10   2  15 260.776 4.70460   2
  12   2  12 76.1030 1.91378  -1
 -12   2  16 76.1030 1.91378   2
  14   2  12 115.500 3.48312  -1
 -14   2  17 115.500 3.48312   2
  16   2  12 35.0285 3.13795  -1
 -16   2  17 35.0285 3.13795   2
  18   2  12 41.7594 2.34793  -1
 -18   2  18 41.7594 2.34793   2
  20   2  12 0.09867 4.06464  -1
 -20   2  19 0.09867 4.06464   2
  22   2  12 -1.0066 6.97814  -1
 -22   2  19 -1.0066 6.97814   2
  24   2  12 11.8731 3.53883  -1
 -24   2  20 11.8731 3.53883   2
  26   2  12 35.3949 8.37525  -1
 -26   2  21 35.3949 8.37525   2
  28   2  12 22.1612 12.8262  -1
 -28   2  21 22.1612 12.8262   2
  30   2  12 25.6437 11.7643  -1
 -30   2  22 25.6437 11.7643   2
 -35   3  12 14.4534 15.2862  -1
  35   3   0 14.4534 15.2862   2
 -33   3  12 14.6889 7.50874  -1
  33   3   1 14.6889 7.50874   2
 -31   3  12 40.4381 12.4310  -1
  31   3   2 40.4381 12.4310   2
 -29   3  12 24.7522 6.55666  -1
  29   3   2 24.7522 6.55666   2
 -27   3  12 41.4483 3.47014  -1
  27   3   3 41.4483 3.47014   2
 -25   3  12 86.8036 4.87734  -1
  25   3   4 86.8036 4.87734   2
 -23   3  12 159.372 5.71527  -1
  23   3   4 159.372 5.71527   2
 -21   3  12 257.000 4.53878  -1
  21   3   5 257.000 4.53878   2
 -19   3  12 112.669 3.25287  -1
  19   3   6 112.669 3.25287   2
 -17   3  12 230.650 4.01911  -1
  17   3   6 230.650 4.01911   2
 -15   3  12 260.714 3.49997  -1
  15   3   7 260.714 3.49997   2
 -13   3  12 80.9605 2.94271  -1
  13   3   8 80.9605 2.94271   2
 -11   3  12 217.272 3.60826  -1
  11   3   8 217.272 3.60826   2
  -9   3  12 24.6993 1.03701  -1
   9   3   9 24.6993 1.03701   2
  -7   3  12 184.307 2.85388  -1
   7   3  10 184.307 2.85388   2
  -5   3  12 297.070 3.87835  -1
   5   3  10 297.070 3.87835   2
  -3   3  12 29.0259 0.97813  -1
   3   3  11 29.0259 0.97813   2
  -1   3  12 198.921 3.64556  -1
   1   3  12 198.921 3.64556   2
   1   3  12 186.211 3.29903  -1
  -1   3  12 186.211 3.29903   2
   3   3  12 246.284 2.63444  -1
  -3   3  13 246.284 2.63444   2
   5   3  12 233.738 4.27637  -1
  -5   3  14 233.738 4.27637   2
   7   3  12 252.014 4.92269  -1
  -7   3  14 252.014 4.92269   2
   9   3  12 311.244 3.77673  -1
  -9   3  15 311.244 3.77673   2
  11   3  12 222.650 4.66280  -1
 -11   3  16 222.650 4.66280   2
  13   3  12 131.613 3.72669  -1
 -13   3  16 131.613 3.72669   2
  15   3  12 75.1687 2.27656  -1
 -15   3  17 75.1687 2.27656   2
  17   3  12 32.0688 3.89417  -1
 -17   3  18 32.0688 3.89417   2
  19   3  12 52.0805 7.23496  -1
 -19   3  18 52.0805 7.23496   2
  21   3  12 5.00146 2.79756  -1
 -21   3  19 5.00146 2.79756   2
  23   3  12 23.2050 10.9503  -1
 -23   3  20 23.2050 10.9503   2
  25   3  12 18.9701 8.44657  -1
 -25   3  20 18.9701 8.44657   2
  27   3  12 -0.0684 4.49330  -1
 -27   3  21 -0.0684 4.49330   2
  29   3  12 5.87561 13.5252  -1
 -29   3  22 5.87561 13.5252   2
  31   3  12 11.2852 14.1516  -1
 -31   3  22 11.2852 14.1516   2
 -32   4  12 61.0343 13.8437  -1
  32   4   1 61.0343 13.8437   2
 -30   4  12 11.4839 5.92883  -1
  30   4   2 11.4839 5.92883   2
 -28   4  12 9.84901 6.62235  -1
  28   4   3 9.84901 6.62235   2
 -26   4  12 19.5310 4.97667  -1
  26   4   3 19.5310 4.97667   2
 -24   4  12 105.249 3.96870  -1
  24   4   4 105.249 3.96870   2
 -22   4  12 37.7756 4.36343  -1
  22   4   5 37.7756 4.36343   2
 -20   4  12 8.11066 3.11058  -1
  20   4   5 8.11066 3.11058   2
 -18   4  12 80.7399 2.43427  -1
  18   4   6 80.7399 2.43427   2
 -16   4  12 73.9093 2.98981  -1
  16   4   7 73.9093 2.98981   2
 -14   4  12 154.113 3.54602  -1
  14   4   7 154.113 3.54602   2
 -12   4  12 90.8451 1.72189  -1
  12   4   8 90.8451 1.72189   2
 -10   4  12 169.620 2.78853  -1
  10   4   9 169.620 2.78853   2
  -8   4  12 359.116 4.41224  -1
   8   4   9 359.116 4.41224   2
  -6   4  12 376.405 3.88900  -1
   6   4  10 376.405 3.88900   2
  -4   4  12 119.318 2.29338  -1
   4   4  11 119.318 2.29338   2
  -2   4  12 53.4107 2.07486  -1
   2   4  11 53.4107 2.07486   2
   0   4  12 184.318 2.25982  -1
   0   4  12 184.318 2.25982   2
   2   4  12 110.246 2.33968  -1
  -2   4  13 110.246 2.33968   2
   4   4  12 45.7933 2.22215  -1
  -4   4  13 45.7933 2.22215   2
   6   4  12 78.0030 1.54885  -1
  -6   4  14 78.0030 1.54885   2
   8   4  12 73.7381 2.95493  -1
  -8   4  15 73.7381 2.95493   2
  10   4  12 34.3223 2.87843  -1
 -10   4  15 34.3223 2.87843   2
  12   4  12 209.396 3.23164  -1
 -12   4  16 209.396 3.23164   2
  14   4  12 46.4978 3.51765  -1
 -14   4  17 46.4978 3.51765   2
  16   4  12 35.8613 6.66473  -1
 -16   4  17 35.8613 6.66473   2
  18   4  12 177.431 4.44850  -1
 -18   4  18 177.431 4.44850   2
  20   4  12 42.6574 7.56907  -1
 -20   4  19 42.6574 7.56907   2
  22   4  12 10.3887 7.44124  -1
 -22   4  19 10.3887 7.44124   2
  24   4  12 18.9236 4.10777  -1
 -24   4  20 18.9236 4.10777   2
  26   4  12 18.7903 12.3401  -1
 -26   4  21 18.7903 12.3401   2
  28   4  12 3.11034 13.0788  -1
 -28   4  21 3.11034 13.0788   2
  30   4  12 3.07560 10.4691  -1
 -30   4  22 3.07560 10.4691   2
 -33   5  12 19.1100 12.1058  -1
  33   5   1 19.1100 12.1058   2
 -31   5  12 -5.5161 10.1007  -1
  31   5   2 -5.5161 10.1007   2
 -29   5  12 12.3806 8.54112  -1
  29   5   2 12.3806 8.54112   2
 -27   5  12 1.21012 3.47451  -1
  27   5   3 1.21012 3.47451   2
 -25   5  12 14.5982 4.59457  -1
  25   5   4 14.5982 4.59457   2
 -23   5  12 6.41739 4.39127  -1
  23   5   4 6.41739 4.39127   2
 -21   5  12 52.4973 2.81336  -1
  21   5   5 52.4973 2.81336   2
 -19   5  12 5.29628 2.95196  -1
  19   5   6 5.29628 2.95196   2
 -17   5  12 7.05314 2.82670  -1
  17   5   6 7.05314 2.82670   2
 -15   5  12 27.6408 1.50231  -1
  15   5   7 27.6408 1.50231   2
 -13   5  12 69.8150 2.58670  -1
  13   5   8 69.8150 2.58670   2
 -11   5  12 126.009 2.77069  -1
  11   5   8 126.009 2.77069   2
  -9   5  12 234.336 2.79243  -1
   9   5   9 234.336 2.79243   2
  -7   5  12 163.392 2.87628  -1
   7   5  10 163.392 2.87628   2
  -5   5  12 111.104 2.37061  -1
   5   5  10 111.104 2.37061   2
  -3   5  12 96.7890 1.61026  -1
   3   5  11 96.7890 1.61026   2
  -1   5  12 31.8259 2.10516  -1
   1   5  12 31.8259 2.10516   2
   1   5  12 30.7975 2.22861  -1
  -1   5  12 30.7975 2.22861   2
   3   5  12 10.5773 0.99776  -1
  -3   5  13 10.5773 0.99776   2
   5   5  12 21.0098 2.27763  -1
  -5   5  14 21.0098 2.27763   2
   7   5  12 25.3218 2.51315  -1
  -7   5  14 25.3218 2.51315   2
   9   5  12 285.108 3.67006  -1
  -9   5  15 285.108 3.67006   2
  11   5  12 94.9776 3.70726  -1
 -11   5  16 94.9776 3.70726   2
  13   5  12 27.5025 3.32975  -1
 -13   5  16 27.5025 3.32975   2
  15   5  12 127.909 3.74006  -1
 -15   5  17 127.909 3.74006   2
  17   5  12 66.8920 6.58969  -1
 -17   5  18 66.8920 6.58969   2
  19   5  12 9.98658 7.19021  -1
 -19   5  18 9.98658 7.19021   2
  21   5  12 40.2912 3.16586  -1
 -21   5  19 40.2912 3.16586   2
  23   5  12 52.8852 8.58078  -1
 -23   5  20 52.8852 8.58078   2
  25   5  12 7.56826 11.9959  -1
 -25   5  20 7.56826 11.9959   2
  27   5  12 -0.0077 4.85192  -1
 -27   5  21 -0.0077 4.85192   2
  29   5  12 16.0362 14.0795  -1
 -29   5  22 16.0362 14.0795   2
 -30   6  12 17.2824 6.14348  -1
  30   6   2 17.2824 6.14348   2
 -28   6  12 42.7046 9.95530  -1
  28   6   3 42.7046 9.95530   2
 -26   6  12 23.8016 6.17108  -1
  26   6   3 23.8016 6.17108   2
 -24   6  12 129.151 4.14757  -1
  24   6   4 129.151 4.14757   2
 -22   6  12 102.486 5.11548  -1
  22   6   5 102.486 5.11548   2
 -20   6  12 138.739 5.18331  -1
  20   6   5 138.739 5.18331   2
 -18   6  12 124.601 3.16123  -1
  18   6   6 124.601 3.16123   2
 -16   6  12 59.2239 3.28134  -1
  16   6   7 59.2239 3.28134   2
 -14   6  12 15.4270 2.45223  -1
  14   6   7 15.4270 2.45223   2
 -12   6  12 168.357 2.71097  -1
  12   6   8 168.357 2.71097   2
 -10   6  12 14.1147 1.95973  -1
  10   6   9 14.1147 1.95973   2
  -8   6  12 172.531 3.10184  -1
   8   6   9 172.531 3.10184   2
  -6   6  12 82.0716 1.67870  -1
   6   6  10 82.0716 1.67870   2
  -4   6  12 125.122 2.91618  -1
   4   6  11 125.122 2.91618   2
  -2   6  12 273.577 4.36437  -1
   2   6  11 273.577 4.36437   2
   0   6  12 15.1135 1.06761  -1
   0   6  12 15.1135 1.06761   2
   2   6  12 59.8612 2.85124  -1
  -2   6  13 59.8612 2.85124   2
   4   6  12 241.890 4.35571  -1
  -4   6  13 241.890 4.35571   2
   6   6  12 103.430 2.12886  -1
  -6   6  14 103.430 2.12886   2
   8   6  12 301.966 5.30301  -1
  -8   6  15 301.966 5.30301   2
  10   6  12 333.226 6.13777  -1
 -10   6  15 333.226 6.13777   2
  12   6  12 71.8295 2.36999  -1
 -12   6  16 71.8295 2.36999   2
  14   6  12 84.2411 6.63183  -1
 -14   6  17 84.2411 6.63183   2
  16   6  12 76.1683 6.47499  -1
 -16   6  17 76.1683 6.47499   2
  18   6  12 1.05442 2.68374  -1
 -18   6  18 1.05442 2.68374   2
  20   6  12 23.9331 7.87473  -1
 -20   6  19 23.9331 7.87473   2
  22   6  12 62.2242 8.63757  -1
 -22   6  19 62.2242 8.63757   2
  24   6  12 21.8866 4.37598  -1
 -24   6  20 21.8866 4.37598   2
  26   6  12 25.2917 12.8667  -1
 -26   6  21 25.2917 12.8667   2
  28   6  12 -4.1706 14.1652  -1
 -28   6  21 -4.1706 14.1652   2
 -29   7  12 74.7098 10.7681  -1
  29   7   2 74.7098 10.7681   2
 -27   7  12 73.4880 6.19840  -1
  27   7   3 73.4880 6.19840   2
 -25   7  12 169.197 8.63300  -1
  25   7   4 169.197 8.63300   2
 -23   7  12 233.004 8.07861  -1
  23   7   4 233.004 8.07861   2
 -21   7  12 120.489 4.03530  -1
  21   7   5 120.489 4.03530   2
 -19   7  12 214.197 5.96061  -1
  19   7   6 214.197 5.96061   2
 -17   7  12 234.406 5.17706  -1
  17   7   6 234.406 5.17706   2
 -15   7  12 30.9349 2.17341  -1
  15   7   7 30.9349 2.17341   2
 -13   7  12 5.52159 2.87827  -1
  13   7   8 5.52159 2.87827   2
 -11   7  12 55.4084 3.02154  -1
  11   7   8 55.4084 3.02154   2
  -9   7  12 35.2559 1.77827  -1
   9   7   9 35.2559 1.77827   2
  -7   7  12 195.312 3.98019  -1
   7   7  10 195.312 3.98019   2
  -5   7  12 102.673 2.87401  -1
   5   7  10 102.673 2.87401   2
  -3   7  12 60.9010 1.72116  -1
   3   7  11 60.9010 1.72116   2
  -1   7  12 240.001 4.25513  -1
   1   7  12 240.001 4.25513   2
   1   7  12 225.940 4.35212  -1
  -1   7  12 225.940 4.35212   2
   3   7  12 344.077 4.11496  -1
  -3   7  13 344.077 4.11496   2
   5   7  12 461.232 6.72225  -1
  -5   7  14 461.232 6.72225   2
   7   7  12 291.124 5.44172  -1
  -7   7  14 291.124 5.44172   2
   9   7  12 311.378 4.49600  -1
  -9   7  15 311.378 4.49600   2
  11   7  12 226.248 5.72624  -1
 -11   7  16 226.248 5.72624   2
  13   7  12 153.845 6.58132  -1
 -13   7  16 153.845 6.58132   2
  15   7  12 36.0654 3.04879  -1
 -15   7  17 36.0654 3.04879   2
  17   7  12 -4.1106 5.94967  -1
 -17   7  18 -4.1106 5.94967   2
  19   7  12 29.6190 6.41342  -1
 -19   7  18 29.6190 6.41342   2
  21   7  12 1.57756 3.01385  -1
 -21   7  19 1.57756 3.01385   2
  23   7  12 37.4756 13.3228  -1
 -23   7  20 37.4756 13.3228   2
  25   7  12 7.07869 13.6005  -1
 -25   7  20 7.07869 13.6005   2
  27   7  12 -1.0798 11.0483  -1
 -27   7  21 -1.0798 11.0483   2
 -30   8  12 14.1601 11.8395  -1
  30   8   2 14.1601 11.8395   2
 -28   8  12 20.3607 16.3204  -1
  28   8   3 20.3607 16.3204   2
 -26   8  12 119.602 10.8562  -1
  26   8   3 119.602 10.8562   2
 -24   8  12 142.782 5.27535  -1
  24   8   4 142.782 5.27535   2
 -22   8  12 111.892 5.65260  -1
  22   8   5 111.892 5.65260   2
 -20   8  12 126.034 6.21147  -1
  20   8   5 126.034 6.21147   2
 -18   8  12 121.578 3.66713  -1
  18   8   6 121.578 3.66713   2
 -16   8  12 101.187 4.44179  -1
  16   8   7 101.187 4.44179   2
 -14   8  12 37.8426 3.44589  -1
  14   8   7 37.8426 3.44589   2
 -12   8  12 12.3689 2.23073  -1
  12   8   8 12.3689 2.23073   2
 -10   8  12 4.40302 3.53612  -1
  10   8   9 4.40302 3.53612   2
  -8   8  12 53.7183 3.05758  -1
   8   8   9 53.7183 3.05758   2
  -6   8  12 40.2141 2.04282  -1
   6   8  10 40.2141 2.04282   2
  -4   8  12 47.6050 3.17488  -1
   4   8  11 47.6050 3.17488   2
  -2   8  12 38.9778 2.70259  -1
   2   8  11 38.9778 2.70259   2
   0   8  12 271.053 4.04132  -1
   0   8  12 271.053 4.04132   2
   2   8  12 172.067 3.85416  -1
  -2   8  13 172.067 3.85416   2
   4   8  12 346.040 7.10842  -1
  -4   8  13 346.040 7.10842   2
   6   8  12 298.556 4.52967  -1
  -6   8  14 298.556 4.52967   2
   8   8  12 462.635 8.06241  -1
  -8   8  15 462.635 8.06241   2
  10   8  12 364.136 7.53364  -1
 -10   8  15 364.136 7.53364   2
  12   8  12 112.034 3.42978  -1
 -12   8  16 112.034 3.42978   2
  14   8  12 84.9682 5.30847  -1
 -14   8  17 84.9682 5.30847   2
  16   8  12 29.6262 6.37632  -1
 -16   8  17 29.6262 6.37632   2
  18   8  12 8.14686 3.18645  -1
 -18   8  18 8.14686 3.18645   2
  20   8  12 15.0818 7.84348  -1
 -20   8  19 15.0818 7.84348   2
  22   8  12 -6.1524 12.6383  -1
 -22   8  19 -6.1524 12.6383   2
  24   8  12 12.5859 4.63294  -1
 -24   8  20 12.5859 4.63294   2
  26   8  12 11.7165 13.8470  -1
 -26   8  21 11.7165 13.8470   2
 -27   9  12 0.44349 6.69148  -1
  27   9   3 0.44349 6.69148   2
 -25   9  12 13.4141 16.0715  -1
  25   9   4 13.4141 16.0715   2
 -23   9  12 14.4312 8.96911  -1
  23   9   4 14.4312 8.96911   2
 -21   9  12 9.21821 3.51903  -1
  21   9   5 9.21821 3.51903   2
 -19   9  12 23.5706 5.24195  -1
  19   9   6 23.5706 5.24195   2
 -17   9  12 0.42087 5.64229  -1
  17   9   6 0.42087 5.64229   2
 -15   9  12 1.28645 2.66892  -1
  15   9   7 1.28645 2.66892   2
 -13   9  12 1.68334 3.89476  -1
  13   9   8 1.68334 3.89476   2
 -11   9  12 25.8897 4.15461  -1
  11   9   8 25.8897 4.15461   2
  -9   9  12 56.9773 2.87050  -1
   9   9   9 56.9773 2.87050   2
  -7   9  12 77.5550 4.08878  -1
   7   9  10 77.5550 4.08878   2
  -5   9  12 37.4610 3.71469  -1
   5   9  10 37.4610 3.71469   2
  -3   9  12 124.710 2.72716  -1
   3   9  11 124.710 2.72716   2
  -1   9  12 22.1436 3.41588  -1
   1   9  12 22.1436 3.41588   2
   1   9  12 18.2172 3.18661  -1
  -1   9  12 18.2172 3.18661   2
   3   9  12 76.8457 2.54238  -1
  -3   9  13 76.8457 2.54238   2
   5   9  12 90.2251 4.45939  -1
  -5   9  14 90.2251 4.45939   2
   7   9  12 82.0455 5.01310  -1
  -7   9  14 82.0455 5.01310   2
   9   9  12 68.3185 2.99513  -1
  -9   9  15 68.3185 2.99513   2
  11   9  12 24.4197 4.39407  -1
 -11   9  16 24.4197 4.39407   2
  13   9  12 -2.5267 4.67551  -1
 -13   9  16 -2.5267 4.67551   2
  15   9  12 41.7180 3.52606  -1
 -15   9  17 41.7180 3.52606   2
  17   9  12 16.5249 5.77507  -1
 -17   9  18 16.5249 5.77507   2
  19   9  12 -2.2112 8.63305  -1
 -19   9  18 -2.2112 8.63305   2
  21   9  12 9.33636 4.27848  -1
 -21   9  19 9.33636 4.27848   2
  23   9  12 7.81907 12.6985  -1
 -23   9  20 7.81907 12.6985   2
  25   9  12 3.83444 13.7539  -1
 -25   9  20 3.83444 13.7539   2
 -24  10  12 6.86414 6.63590  -1
  24  10   4 6.86414 6.63590   2
 -22  10  12 20.1350 10.8983  -1
  22  10   5 20.1350 10.8983   2
 -20  10  12 9.24479 7.01587  -1
  20  10   5 9.24479 7.01587   2
 -18  10  12 10.3204 3.50361  -1
  18  10   6 10.3204 3.50361   2
 -16  10  12 32.3119 6.44662  -1
  16  10   7 32.3119 6.44662   2
 -14  10  12 74.7796 5.59667  -1
  14  10   7 74.7796 5.59667   2
 -12  10  12 96.8470 3.99783  -1
  12  10   8 96.8470 3.99783   2
 -10  10  12 72.8968 6.09056  -1
  10  10   9 72.8968 6.09056   2
  -8  10  12 180.800 7.34828  -1
   8  10   9 180.800 7.34828   2
  -6  10  12 200.061 4.53938  -1
   6  10  10 200.061 4.53938   2
  -4  10  12 111.718 4.75241  -1
   4  10  11 111.718 4.75241   2
  -2  10  12 192.655 5.26146  -1
   2  10  11 192.655 5.26146   2
   0  10  12 108.737 2.73908  -1
   0  10  12 108.737 2.73908   2
   2  10  12 42.8949 3.58536  -1
  -2  10  13 42.8949 3.58536   2
   4  10  12 11.7061 3.90953  -1
  -4  10  13 11.7061 3.90953   2
   6  10  12 32.8545 2.31223  -1
  -6  10  14 32.8545 2.31223   2
   8  10  12 34.8008 5.60227  -1
  -8  10  15 34.8008 5.60227   2
  10  10  12 18.8262 7.59159  -1
 -10  10  15 18.8262 7.59159   2
  12  10  12 18.6244 2.98427  -1
 -12  10  16 18.6244 2.98427   2
  14  10  12 40.2635 6.97638  -1
 -14  10  17 40.2635 6.97638   2
  16  10  12 11.2403 5.92790  -1
 -16  10  17 11.2403 5.92790   2
  18  10  12 28.5778 4.11137  -1
 -18  10  18 28.5778 4.11137   2
  20  10  12 45.0481 13.6470  -1
 -20  10  19 45.0481 13.6470   2
[truncated: 321,661 more chars]
